# Supplementary material for: A system for functional studies of the major virulence factor of malaria parasites
Source: bioRxiv preprint, doi:10.1101/2024.04.30.591946, version 4 (2025-11-11)
Supplement: Table S4 [file 591946_file06.xlsx]

## Sheet: SDS Samples
Majority protein IDs	Gene product	iBAQ PfEMP1_SDS_control_1	iBAQ PfEMP1_SDS_control_2	iBAQ PfEMP1_SDS_control_3	iBAQ PfEMP1_SDS_X_1	iBAQ PfEMP1_SDS_Y_1	iBAQ PfEMP1_SDS_Z_1	iBAQ PfEMP1_SDS_X_2	iBAQ PfEMP1_SDS_Y_2	iBAQ PfEMP1_SDS_Z_2	iBAQ PfEMP1_SDS_X_3	iBAQ PfEMP1_SDS_Y_3	iBAQ PfEMP1_SDS_Z_3	Student's T-test Significant pos1_control	Student's T-test significant	Student's T-test Significant pos2_control	Student's T-test significant_	Student's T-test Significant pos3_control	Student's T-test significant__	Peptides	Razor + unique peptides	Unique peptides	Sequence coverage [%]	Unique + razor sequence coverage [%]	Unique sequence coverage [%]	Mol. weight [kDa]	Q-value	Score	Intensity	MS/MS count	Intensity PfEMP1_SDS_control_1	Intensity PfEMP1_SDS_control_2	Intensity PfEMP1_SDS_control_3	Intensity PfEMP1_SDS_X_1	Intensity PfEMP1_SDS_X_2	Intensity PfEMP1_SDS_X_3	Intensity PfEMP1_SDS_Y_1	Intensity PfEMP1_SDS_Y_2	Intensity PfEMP1_SDS_Y_3	Intensity PfEMP1_SDS_Z_1	Intensity PfEMP1_SDS_Z_2	Intensity PfEMP1_SDS_Z_3	iBAQ	-Log Student's T-test p-value pos1_control	Student's T-test q-value pos1_control	Student's T-test Difference pos1_control	Student's T-test Test statistic pos1_control	-Log Student's T-test p-value pos2_control	Student's T-test q-value pos2_control
PfIT_110005700;PfIT_080005100	rifin	12.96	16.7091	11.4852	25.2356	26.538	24.9523	19.8328	20.8375	13.5466	17.2302	19.2863	17.1865							17	17	13	46.2	46.2	36.8	41.395	0	323.31	3465300000	51	0	2142800	0	790130000	18677000	3075000	1948800000	37477000	12788000	649260000	0	2983300	173270000	2.72207	0.0616667	11.8572	7.27534	0.721468	0.91507
PfIT_080005300	stevor	14.5405	14.4925	13.5946	25.358	26.5046	24.6679	16.3429	19.1048	15.0562	14.2551	13.6724	13.2843	+	pos1_control					15	15	13	41.2	41.2	41.2	34.413	0	132.76	2151200000	38	0	0	0	559050000	0	0	1237700000	7329200	169730	346510000	442900	0	165480000	4.27988	0	11.3009	18.2961	0.998502	0.936246
PfIT_130076400	antigen 332, DBL-like protein	12.7182	12.8083	11.1386	23.0184	24.4601	23.0641	21.6332	23.2032	19.8911	21.0693	22.6662	20.5154	+	pos1_control					94	94	94	22.1	22.1	22.1	663.64	0	323.31	13760000000	292	1435300	1527800	480220	1809700000	692800000	468690000	4916100000	2057100000	1417700000	1867900000	207100000	319240000	64600000	4.01628	0	11.2925	15.6924	2.97999	0.1272
PfIT_060021400	erythrocyte membrane protein 1, PfEMP1	18.0708	16.6227	17.4254	28.0479	29.1069	27.7219	27.5575	28.5992	25.9611	26.488	27.5128	26.8577	+	pos1_control	+	pos2_control			262	262	242	70.7	70.7	66.7	319.58	0	323.31	323150000000	1765	41299000	15136000	26403000	41624000000	29629000000	14117000000	86725000000	60998000000	28726000000	33206000000	9798600000	18242000000	2154300000	4.29439	0	10.9193	18.451	3.47746	0.0426667
PfIT_130058600	membrane associated histidine-rich protein	13.9775	21.2816	18.1335	27.7299	29.0739	28.5372	27.7497	28.533	25.5921	26.2812	26.7414	27.8437							5	5	5	32.1	32.1	32.1	15.849	0	142.29	11397000000	59	0	12746000	1437700	1113100000	1128400000	407740000	2825400000	1942000000	560950000	1947700000	252920000	1204400000	2279400000	2.1104	0.0896	10.6495	4.95106	1.84399	0.499059
PfIT_130075600	membrane associated histidine-rich protein	16.3935	19.3299	17.3095	27.8173	27.8734	27.0336	27.5748	28.3921	24.0239	25.8475	27.351	26.1014	+	pos1_control					14	14	14	42.2	42.2	42.2	31.865	0	274.7	11948000000	104	688710	5271800	1299500	1892000000	1599300000	483020000	1967000000	2818200000	1369500000	1099100000	136460000	575940000	1493500000	3.3941	0.0112727	9.89711	10.8907	2.30934	0.404444
PfIT_090040600	ring-exported protein 1	13.2272	17.1822	15.0373	25.2973	25.1815	23.5259	24.909	25.3098	21.2924	23.661	23.5173	22.3967							29	29	29	49.2	49.2	49.2	78.626	0	323.31	6336000000	122	0	4759100	1076000	1319400000	1008100000	424460000	1217700000	1330900000	384200000	386490000	82190000	176700000	198000000	2.76027	0.0527619	9.51928	7.44703	2.1463	0.376667
PfIT_130039800	MSP7-like protein	11.7895	19.7109	14.8636	24.05	26.0686	24.5352	23.5761	25.872	21.7811	23.2812	24.674	22.8111							26	26	26	36	36	36	71.501	0	323.31	6574100000	128	0	24029000	834730	486340000	350170000	285420000	1970600000	1719500000	749480000	680730000	100910000	206050000	234790000	1.77584	0.125357	9.42992	3.95443	1.48187	0.79824
PfIT_050006600	parasite-infected erythrocyte surface protein	16.8902	18.1095	16.9533	27.1726	27.2391	25.5874	25.3829	26.4194	22.785	24.9774	25.6549	23.5054	+	pos1_control					19	19	19	51.4	51.4	51.4	49.318	0	323.31	10784000000	97	2186500	5090700	2284300	2722900000	787570000	594610000	2851400000	1615500000	951000000	907530000	130090000	214340000	599140000	3.8161	0	9.34866	13.96	2.5522	0.302857
PfIT_010017100;PfIT_060035200	Pfmc-2TM Maurers cleft two transmembrane protein	11.928	12.6783	11.9354	21.7683	20.8761	21.0931	16.9257	13.9001	15.0195	14.13	12.892	14.7966	+	pos1_control					2	2	1	10.8	10.8	5.6	27.196	0	12.952	54134000	6	0	0	0	25004000	0	0	13472000	0	0	15659000	0	0	7733500	4.80118	0	9.06526	24.7545	NaN	1
PfIT_050006700	skeleton-binding protein 1	18.3847	21.238	20.7893	29.4986	28.8632	27.7583	28.5793	28.6499	26.0912	28.2508	29.0678	27.1216	+	pos1_control					10	10	10	32.5	32.5	32.5	36.613	0	242.47	27203000000	63	2738100	19787000	14497000	6068200000	3208600000	2555200000	3906500000	3369500000	4501500000	1816200000	571910000	1168100000	3400400000	2.95695	0.038	8.56936	8.39003	2.47615	0.3125
PfIT_080035300	Plasmodium exported protein (PHISTc), unknown function	12.2079	12.5971	10.9174	20.0566	20.662	20.6591	19.3428	18.9842	20.2511	21.1069	18.3984	19.7585	+	pos1_control	+	pos2_control			3	3	3	6.8	6.8	6.8	54.516	0	3.1464	113610000	5	0	0	0	11996000	7314200	24843000	18250000	5704100	3800700	18214000	13727000	9756700	10328000	4.01272	0	8.55172	15.6599	3.56527	0.064
PfIT_100005600	alpha/beta hydrolase, putative	12.0626	12.8211	12.6273	19.1146	21.6122	21.8899	19.1397	20.6202	20.2253	17.9043	18.0566	21.5396	+	pos1_control	+	pos2_control			19	19	19	26.1	26.1	26.1	107.66	0	76.976	702760000	53	0	0	0	27247000	27725000	11775000	153870000	77362000	13086000	186530000	58839000	146320000	14641000	3.10737	0.0193846	8.36858	9.18305	3.94511	0
PfIT_080037300	rifin	12.9059	13.1423	10.9811	19.7778	21.7054	19.8957	17.0172	13.9709	12.2432	15.4177	13.4008	13.3242	+	pos1_control					3	3	3	14.2	14.2	14.2	38.206	0	123.32	63526000	5	0	0	0	10787000	0	0	41034000	0	0	11705000	0	0	5293800	3.02958	0.0434286	8.11653	8.7647	NaN	1
PfIT_040005500	rifin	13.1947	15.8052	13.8498	21.9341	23.4043	21.4156	17.4685	17.4254	12.6452	15.3688	13.7206	14.3092	+	pos1_control					6	6	5	21.6	21.6	19.4	36.361	0	26.504	235820000	13	0	744360	0	52092000	0	0	144330000	2288300	0	36364000	0	0	18140000	2.89704	0.0357647	7.96811	8.09199	0.366518	0.701655
PfIT_130076800	Plasmodium exported protein, unknown function	14.3211	16.822	12.4885	24.4536	22.3908	20.1048	24.2272	24.3633	18.6245	19.0589	19.6788	19.7153							3	3	3	19.1	19.1	19.1	25.406	0	17.613	956640000	14	0	1506100	0	298670000	255310000	7099800	71488000	280550000	10910000	14658000	5253700	11191000	73587000	1.92403	0.102462	7.7725	4.37605	1.58941	0.664182
PfIT_070007300	small exported membrane protein 1	13.8149	17.1871	15.9683	23.1598	23.957	23.1144	23.562	23.787	19.1333	20.092	22.9496	21.3061	+	pos1_control					4	4	4	29.3	29.3	29.3	14.195	0	103.99	593560000	19	0	1193700	512890	74970000	99076000	8941000	130280000	115790000	64804000	72647000	4600200	20742000	74195000	2.789	0.0517895	7.75365	7.57857	1.64212	0.655
PfIT_070035300	acyl-CoA synthetase	12.6335	18.8973	10.9145	21.1	22.9738	21.0657	20.9362	21.6957	18.9423	20.0709	20.6402	19.3692							16	16	16	25.3	25.3	25.3	93.239	0	93.966	832060000	57	0	18066000	0	83160000	74242000	40753000	304790000	125680000	60466000	81209000	18638000	25056000	22488000	1.40637	0.223619	7.56467	3.01824	1.17072	0.855304
PfIT_100005800	alpha/beta hydrolase, putative	13.8489	19.6807	12.0509	20.4995	23.9164	23.1303	20.0556	22.8367	21.5938	20.5937	21.6089	22.3237							19	19	19	28.4	28.4	28.4	86.671	0	71.925	1915500000	106	0	32774000	0	57815000	42500000	61715000	617500000	292150000	124740000	358090000	123440000	204730000	49114000	1.35579	0.219174	7.32195	2.90093	1.21396	0.854
PfIT_100006100	Plasmodium exported protein (hyp16), unknown function	13.7791	15.3947	12.287	22.1074	21.0667	20.2292	22.0834	21.397	18.9561	20.6686	20.596	19.6981							2	2	2	7.2	7.2	7.2	32.138	0	3.4357	335920000	13	0	0	0	76812000	75545000	28335000	37339000	46945000	26943000	20894000	8645600	14460000	19760000	2.65276	0.0528571	7.31414	6.97263	2.23122	0.4016
PfIT_020007000	EMP1-trafficking protein	13.0745	13.6611	10.8257	20.4955	19.2256	19.7158	21.8046	20.2657	13.9766	20.771	18.0985	14.8766	+	pos1_control					3	3	3	13.1	13.1	13.1	33.727	0	12.237	139240000	4	0	0	0	20696000	51282000	25051000	8582400	17649000	3929400	12055000	0	0	9946000	2.82747	0.0546667	7.29186	7.75791	1.13838	0.8925
PfIT_090007100	serine/threonine protein kinase, FIKK family	13.1557	14.2144	10.401	19.3666	20.9351	19.1826	18.0694	21.3919	14.9119	17.126	19.0443	17.1014							5	5	5	10.2	10.2	10.2	72.458	0	9.721	270830000	12	0	0	0	25686000	10453000	5435100	76187000	104560000	20545000	22611000	0	5343700	7127000	2.33518	0.0581176	7.23774	5.72021	1.18846	0.850578
PfIT_120006300	acyl-CoA synthetase	12.6913	13.231	12.8253	19.998	20.1758	20.0768	17.2636	15.0725	12.3893	14.3781	15.1257	14.9302	+	pos1_control					6	6	6	7.6	7.6	7.6	104.72	0	8.1499	137130000	10	0	0	0	40838000	6136600	830410	46196000	0	0	43132000	0	0	3516200	5.72103	0	7.16762	42.1102	0.632853	0.793582
PfIT_100006300	EMP1-trafficking protein	11.9757	14.6092	14.2416	21.3784	20.7366	19.8747	21.3227	21.1046	18.2001	19.885	19.237	19.0701	+	pos1_control					3	3	3	18.3	18.3	18.3	65.813	0	41.155	420750000	17	0	0	0	89962000	86557000	31952000	57656000	74413000	20391000	31725000	9937500	18162000	12750000	2.78775	0.0492	7.05442	7.57282	2.14858	0.399636
PfIT_060005700	conserved Plasmodium protein, unknown function	13.7579	17.0536	15.9141	22.5085	22.8273	22.1203	21.5968	22.6307	19.6144	21.6547	22.0779	21.0477							1	1	1	6.2	6.2	6.2	14.725	0.0080367	1.6729	154120000	7	0	544110	246980	23866000	12686000	13206000	29768000	25977000	17708000	18236000	3210500	8670400	38530000	2.6582	0.0569231	6.91016	6.99599	1.91658	0.43675
PfIT_100020500	serine/threonine protein kinase, FIKK family	13.0115	19.066	15.14	21.2757	23.8145	22.7018	20.6321	23.06	20.4277	20.5818	21.3695	20.8145							14	14	14	23.6	23.6	23.6	72.491	0	113.7	1363300000	59	0	17563000	1155400	81240000	52003000	50220000	472100000	279830000	86696000	218310000	45132000	59011000	42602000	1.63239	0.149882	6.85818	3.57296	1.34139	0.857161
PfIT_130058500	Plasmodium exported protein, unknown function	13.8657	17.1821	12.525	21.6789	21.637	20.8066	21.2745	21.5987	18.9272	19.9548	20.402	20.8338							2	2	2	8.4	8.4	8.4	32.774	0	19.241	343500000	16	0	2676800	0	60433000	45661000	18292000	58701000	57164000	24940000	33013000	8973000	33641000	19083000	2.07819	0.09	6.84986	4.84786	1.70036	0.589895
PfIT_080035200	tryptophan/threonine-rich antigen	11.9761	16.3804	14.6172	21.6466	20.9864	19.4139	21.0776	20.3134	17.3838	20.0014	19.5821	18.8916							14	14	14	23.4	23.4	23.4	80.452	0	18.597	560160000	34	0	3924200	1156000	151020000	101800000	48284000	95565000	59937000	36105000	32131000	7866900	22372000	12177000	1.93622	0.102039	6.35775	4.41208	1.4369	0.756286
PfIT_070007200	sporozoite threonine and asparagine-rich protein	11.9592	12.9028	13.1167	19.005	19.8451	17.9808	17.6729	18.1536	14.4271	15.0419	16.1937	13.6503	+	pos1_control					3	3	3	8.6	8.6	8.6	62.211	0	3.5512	67400000	7	0	0	0	15257000	6060200	0	27312000	8456100	2173600	7501700	638850	0	2324100	3.20453	0.021	6.28405	9.73143	1.54218	0.715652
PfIT_090006600	Plasmodium exported protein, unknown function	12.6865	14.1563	10.8801	18.0263	20.2857	18.253	17.4614	19.9482	12.887	17.1093	18.058	14.8293							1	1	1	4.5	4.5	4.5	32.88	0.0094837	1.4108	55422000	4	0	0	0	4271600	2887400	2262200	20450000	16186000	4366200	4998300	0	0	3463900	2.21047	0.0682105	6.2807	5.28261	0.856456	1
PfIT_100006200	Plasmodium exported protein (hyp2), unknown function	12.7651	13.0829	13.3408	18.6536	19.9539	19.2707	18.9067	19.9349	17.7318	18.3229	19.438	19.7586	+	pos1_control					5	5	5	13.1	13.1	13.1	53.113	0	9.0193	159520000	11	0	0	0	11547000	13761000	9180800	28438000	28065000	19888000	17710000	6094900	24836000	5697100	3.9578	0	6.2298	15.1658	3.03789	0.159
PfIT_070007400	Plasmodium exported protein, unknown function	12.9233	18.9133	17.1344	22.2846	23.2213	21.8571	22.4062	23.8002	20.6105	21.7251	22.6802	21.2735							8	8	8	43.5	43.5	43.5	27.731	0	27.248	699570000	40	0	6418400	1870300	66417000	72258000	45067000	127130000	189890000	87374000	49384000	20813000	32954000	53813000	1.55069	0.180055	6.13065	3.36633	1.38648	0.8232
PfIT_140083600	Plasmodium exported protein (PHISTb), unknown function	12.9639	19.9303	16.3669	21.8306	23.3943	22.4096	16.7484	13.3689	13.7478	19.9685	20.829	20.3505							10	10	10	25.1	25.1	25.1	59.807	0	62.593	666510000	32	0	25978000	2197400	96972000	0	26675000	286640000	0	48431000	144860000	0	34759000	25635000	1.38553	0.228329	6.12446	2.96963	0.324334	0.703569
PfIT_050006400	Plasmodium exported protein, unknown function	19.0072	21.1424	18.7058	26.135	25.9281	25.1488	25.7618	25.9955	22.2051	24.8237	25.1743	23.6586							7	7	7	21.9	21.9	21.9	30.715	0	156.35	5424200000	39	7376900	32406000	5986100	1031700000	796560000	415720000	893870000	936590000	530100000	520780000	67688000	185390000	387440000	2.75638	0.0503636	6.11883	7.42941	1.59654	0.67181
PfIT_120006700	RESA-like protein with PHIST and DnaJ domains	12.5277	17.7818	13.6445	19.8551	21.8238	20.5312	19.276	21.8467	18.5489	17.8368	18.7467	19.3171							13	13	13	16.9	16.9	16.9	107.63	0	28.672	488710000	35	0	8788700	499430	36988000	24757000	9129800	144780000	147090000	17154000	59097000	14957000	25474000	12531000	1.63559	0.150269	6.08536	3.58123	1.30211	0.871394
PfIT_100037100	early transcribed membrane protein 10.2	12.7775	12.5247	14.878	19.1004	20.3717	18.9476	21.0994	20.6821	15.0563	18.125	19.5012	18.3348							4	4	4	13.5	13.5	13.5	38.925	0	21.309	123390000	8	0	0	0	8993000	35950000	4574000	21707000	26918000	11873000	8089600	0	5289900	7712100	2.65301	0.0548148	6.07983	6.97369	1.24937	0.928889
PfIT_010016900	Plasmodium exported protein (hyp8), unknown function	14.2602	15.3858	11.3095	19.535	20.0858	19.5626	18.6578	19.6881	15.9242	13.1507	17.0375	19.131							3	3	3	15.2	15.2	15.2	28.233	0	4.6102	51906000	6	0	470950	0	8356500	4549500	0	12241000	9291600	1479700	8517700	683990	6315400	4718700	2.10876	0.0874146	6.07598	4.94575	1.25875	0.938286
PfIT_070034700	Plasmodium exported protein, unknown function	12.7596	14.4508	11.1473	19.176	18.7747	18.6348	21.6249	11.2936	14.192	18.6366	16.9423	18.4327							3	3	3	17.6	17.6	17.6	31.783	0	4.7731	77968000	4	0	0	0	8292200	45275000	5705600	6278900	0	1763000	5698700	0	4953800	5569100	2.48387	0.0597419	6.07595	6.28047	0.380617	0.700798
PfIT_060005100;PfIT_000007900	Pfmc-2TM Maurers cleft two transmembrane protein	13.8135	13.3115	11.5295	19.7965	19.179	17.8909	21.103	12.3248	14.3497	13.2242	19.2735	14.0408							2	2	1	10.2	10.2	5.5	27.579	0.0012804	2.2947	41699000	3	0	0	0	8195700	20271000	0	5341700	0	5703500	2187400	0	0	4633200	2.61369	0.0510345	6.07062	6.8069	0.481865	0.705722
PfIT_140067700	40S ribosomal protein S28e, putative	13.5203	13.1664	19.4443	23.0346	19.6535	21.5851	25.0213	11.8127	20.2855	22.7803	20.004	21.9129							2	2	2	35.8	35.8	35.8	7.4937	0	20.917	182440000	8	0	0	2140200	25778000	102160000	21611000	2474100	0	3154600	9438000	3834000	11846000	60813000	1.25623	0.243358	6.04741	2.67643	0.347912	0.712574
PfIT_030006500	Plasmodium exported protein, unknown function	13.3202	14.2625	12.1821	18.6529	21.1067	17.4584	18.6505	18.8885	12.7181	18.8247	18.4226	18.1476							2	2	2	6.9	6.9	6.9	37.389	0.0012136	1.9827	63092000	5	0	0	0	5358200	5349600	6035800	29356000	6308600	4567800	2341300	0	3775100	4853300	2.0397	0.0914783	5.81774	4.72669	0.764195	0.897128
PfIT_110021000	dipeptidyl aminopeptidase 1	10.5965	12.8421	14.5132	16.5361	19.4637	18.3558	19.0566	16.3313	12.9981	10.973	15.1667	16.2793							5	5	5	7.3	7.3	7.3	80.367	0	5.9076	59544000	6	0	0	0	3040900	17448000	0	23136000	2638500	0	10735000	0	2545200	1860700	1.73792	0.132933	5.46791	3.85118	0.76707	0.930107
PfIT_120008500	high mobility group protein B1	12.736	22.4677	23.4315	24.6145	24.6243	25.4138	27.8815	23.8557	24.0747	25.1598	24.8952	25.5902							6	6	6	59.8	59.8	59.8	11.331	0	10.06	2050700000	32	0	23202000	45253000	102750000	989040000	149940000	103450000	60720000	124820000	178800000	70675000	202060000	512670000	0.711864	0.467724	5.33914	1.55836	0.715512	0.916862
PfIT_120058000	Plasmodium exported protein (PHISTb), unknown function	13.6459	14.2905	12.175	18.1941	19.5012	17.9904	18.1832	18.19	12.9913	17.4615	18.4465	14.8846							2	2	2	4	4	4	51.998	0.0079186	1.6272	51172000	2	0	0	0	6297700	6250400	3790100	15583000	6280100	7501700	5468500	0	0	2436700	2.56732	0.0534667	5.19142	6.61466	0.771479	0.940545
PfIT_040006800	Plasmodium exported protein, unknown function	13.6232	14.7665	12.1996	17.7416	20.2847	17.8889	17.9289	20.3132	16.1118	13.1134	15.7186	18.4007							4	4	4	15	15	15	30.963	0	5.793	45148000	8	0	0	0	2629900	2994400	0	15328000	15633000	647050	2912700	849780	4153000	3762300	2.00034	0.100085	5.10862	4.60512	1.49077	0.806167
PfIT_070010600	40S ribosomal protein S29, putative	13.3762	25.3118	24.1762	24.7205	27.3405	25.8743	26.2254	26.1181	23.5369	24.2926	26.2335	24.5776							4	4	4	48.1	48.1	48.1	6.4156	0	46.471	1823000000	19	0	124950000	56871000	82932000	235370000	61648000	509850000	218500000	236700000	184530000	36512000	75112000	607660000	0.576916	0.503949	5.02369	1.29535	0.483236	0.710205
PfIT_120006500	Plasmodium exported protein (PHISTc), unknown function	13.4973	13.9145	13.3309	17.7408	19.5155	18.1519	16.5897	18.2319	15.8382	16.2743	17.2557	13.2734	+	pos1_control					1	1	1	3.1	3.1	3.1	46.247	0.0077778	1.573	35290000	2	0	0	0	3942600	1775300	1426600	13490000	5541400	2816900	5242700	1054500	0	1960600	3.01181	0.0405333	4.8885	8.67165	1.97964	0.489538
PfIT_080036400	heat shock protein 70	16.999	19.4748	16.419	21.6987	23.3362	22.3124	22.4924	22.3273	19.9625	21.2412	20.523	21.0015							22	18	18	38	31.4	31.4	75.052	0	42.76	1421500000	65	4846100	26959000	3241900	125940000	218310000	91711000	391850000	194710000	55747000	192710000	37801000	77673000	38419000	1.9925	0.098	4.81819	4.5812	1.47767	0.772462
PfIT_110024700	alpha/beta hydrolase fold domain containing protein, putative	12.8238	16.3509	11.675	17.929	18.854	18.2254	18.399	17.0219	15.6771	17.3984	17.6833	17.6534							2	2	2	4.8	4.8	4.8	45.849	0.0069124	1.6865	46913000	8	0	1755200	0	5240500	7259100	3628000	9950600	2794700	4419800	6435900	1100300	4329300	2234000	1.52119	0.19328	4.71957	3.29348	0.994209	0.938848
PfIT_020022000	calcium-dependent protein kinase 1	12.4035	19.9613	16.484	21.0056	21.0447	20.6741	23.6607	19.341	19.0509	21.7034	20.4067	20.872							16	16	16	30	30	30	60.799	0	28.529	932130000	53	0	33688000	3024700	69474000	437630000	112690000	71385000	21915000	45870000	55211000	17923000	63330000	28247000	0.991597	0.354701	4.62524	2.11466	0.766123	0.899103
PfIT_020006400	PHISTb domain-containing RESA-like protein 1	13.0792	19.0933	18.2359	21.1972	21.9748	21.0695	15.8944	14.2455	14.0345	14.0916	13.3063	15.1819							6	6	6	14.5	14.5	14.5	59.101	0	17.011	222080000	19	0	12864000	7100300	55302000	1400900	0	94802000	0	0	50616000	0	0	9655900	1.1417	0.292921	4.61108	2.4277	0.455204	0.698557
PfIT_030011700	40S ribosomal protein S23, putative	12.6214	27.3185	25.5801	24.688	28.3316	26.2788	26.8152	28.1525	24.1414	24.1639	27.7866	26.7082							4	4	4	33.1	33.1	33.1	16.13	0	268.33	5834800000	57	0	669480000	200650000	108120000	472330000	75186000	1351200000	1193500000	926080000	325660000	74021000	438550000	1458700000	0.410284	0.600119	4.59282	0.965901	0.400836	0.699511
PfIT_070030000	Plasmodium exported protein, unknown function	13.253	15.3554	11.8927	16.6584	18.817	18.67	15.5071	17.3964	13.0805	14.4395	14.8107	15.2029							3	3	3	4.3	4.3	4.3	94.146	0.001355	2.652	36769000	3	0	0	0	2999800	1350500	0	13393000	5003000	833410	12096000	0	1093700	1267900	1.68663	0.144063	4.54814	3.71432	0.497186	0.706901
PfIT_050023200	conserved protein, unknown function	11.8072	13.6954	16.4493	16.6043	20.198	18.7648	20.9849	19.3195	13.3247	18.0086	19.5833	17.8317							4	4	4	18.1	18.1	18.1	31.471	0	2.9203	76042000	5	0	0	1163300	1295200	26979000	3428400	15636000	8505300	10212000	5790600	0	3032700	5849400	1.24951	0.24237	4.53836	2.66157	0.655181	0.837268
PfIT_100037200	conserved Plasmodium protein, unknown function	14.0456	14.0741	19.0954	20.0983	19.8277	20.8655	23.1501	19.7552	18.5598	20.8347	21.7567	14.0034							2	2	2	14.8	14.8	14.8	14.43	0.0047059	1.7974	82068000	2	0	0	2240500	4490000	37234000	7480400	3722200	3539600	14174000	7641800	1545700	0	20517000	1.24472	0.240143	4.52548	2.651	1.0279	0.924393
PfIT_130050900	inner membrane complex protein	12.265	18.5592	12.4337	18.6112	20.2501	17.8384	22.2977	18.2531	18.6317	20.2751	19.2368	16.8482							5	5	5	13.2	13.2	13.2	43.186	0	4.8429	172500000	9	0	6566500	0	6807500	87644000	21571000	21200000	5310900	10503000	3984300	6904600	2005700	10147000	0.9582	0.354471	4.48065	2.04669	1.02152	0.910667
PfIT_110039700	protein phosphatase PPM8, putative	13.2954	17.351	11.365	17.6589	20.3428	17.2527	20.6011	15.9612	16.8826	17.8908	18.1487	17.4238							6	6	6	9	9	9	79.87	0	6.7871	152070000	13	0	5851300	0	7243100	55670000	8506300	46543000	2232900	10171000	5465600	4229200	6154000	4344800	1.02981	0.345616	4.41429	2.19312	0.775983	0.940917
PfIT_040029300	Plasmodium exported protein (PHISTa), unknown function	12.6915	17.2759	17.3376	20.7752	19.4069	20.3079	16.0044	13.4997	13.5533	20.1789	19.5446	20.3673							6	6	6	19.8	19.8	19.8	33.221	0	7.1713	134680000	17	0	2856700	2981400	32300000	1183200	21366000	12513000	0	13765000	23363000	0	24347000	7482000	1.2955	0.227683	4.39498	2.76402	0.334453	0.707923
PfIT_140026400	conserved Plasmodium protein, unknown function	16.5172	12.9173	11.866	18.9249	18.6533	16.8485	22.1231	13.9291	11.6117	19.2279	17.75	18.7881							5	5	5	14	14	14	59.564	0	4.9043	118600000	11	1594500	0	0	8461000	77652000	10438000	7008800	0	3747300	2006300	0	7695200	6976700	1.3202	0.230085	4.37541	2.81973	0.239804	0.772689
PfIT_050031400	ADP-ribosylation factor GTPase-activating protein, putative	12.8648	14.0573	12.2138	18.3205	15.9519	17.9489	20.5596	14.1796	15.5586	17.9243	15.9004	18.1492							4	4	4	8.1	8.1	8.1	58.489	0	7.6238	82306000	5	0	0	0	9493100	44820000	7213400	1838300	0	1773800	7337700	1399600	8430700	2838100	2.05712	0.0907556	4.3618	4.78123	0.859804	1
PfIT_130034400	myosin C	11.7026	16.9463	11.2961	17.5276	17.7711	17.694	20.6435	16.2232	16.6758	17.7078	15.7997	17.0229							16	16	16	7.4	7.4	7.4	249.98	0	90.879	318260000	20	0	13512000	0	20218000	175260000	22906000	23933000	8185800	6103400	22688000	11202000	14250000	2974400	1.1233	0.301984	4.34926	2.38859	0.921292	0.988378
PfIT_130013400	40S ribosomal protein S27	12.4274	22.1213	21.3487	22.7832	23.1791	22.9537	26.1851	22.0565	22.336	23.0732	22.8416	23.7191							4	4	4	45.1	45.1	45.1	9.1418	0	36.98	444530000	26	0	13687000	8011800	21655000	228890000	26477000	28492000	13086000	22550000	24371000	15883000	41427000	148180000	0.6276	0.475075	4.33953	1.39416	0.654291	0.832752
PfIT_070020600	conserved Plasmodium protein, unknown function	13.3229	16.0385	11.6561	15.9549	19.1502	18.5302	16.3314	17.8851	16.2688	15.6964	17.1004	18.3273							4	4	4	7.5	7.5	7.5	60.557	0	3.7563	47042000	6	0	1682700	0	1588000	0	0	14545000	6052000	3512900	9464300	1974000	8222700	1881700	1.22809	0.244526	4.20592	2.61444	1.07325	0.900214
PfIT_140049500	conserved Plasmodium protein, unknown function	12.4932	12.2808	11.8008	17.6934	16.3215	15.1547	19.5543	15.3459	13.6247	16.6898	14.3969	17.4456							3	3	3	6.6	6.6	6.6	67.545	0	2.9232	44303000	4	0	0	0	6782200	24637000	3382800	2620600	0	0	1167300	0	5712500	1384500	2.27677	0.0584444	4.19827	5.51173	1.05565	0.900966
PfIT_010016300	Plasmodium exported protein, unknown function	17.1775	21.5726	17.4725	22.3143	23.8985	22.5043	22.2156	23.4704	20.4363	21.5324	22.1806	21.8969							16	16	16	32.4	32.4	32.4	70.208	0	142.4	1436500000	94	3557600	74850000	4364700	125170000	116890000	72796000	375300000	278920000	114090000	142780000	34055000	93721000	59854000	1.29799	0.23103	4.16485	2.76961	0.923585	0.99737
PfIT_130057100	conserved Plasmodium protein, unknown function	11.5312	19.5593	19.8695	20.8645	20.71	21.3443	22.8708	19.5469	19.2711	20.4086	20.7794	20.7956							3	3	3	14.3	14.3	14.3	23.875	0	4.0551	176780000	16	0	6180600	7663200	15272000	61358000	11135000	13722000	6127900	14398000	21299000	5061500	14561000	22097000	0.659881	0.465964	3.98624	1.45703	0.531503	0.712523
PfIT_040029200	Plasmodium exported protein (PHISTb), unknown function	14.4922	13.2804	12.3678	16.0954	17.8457	17.9587	15.7824	14.5846	11.6217	15.0588	12.9384	17.9814							1	1	1	3.8	3.8	3.8	36.684	0.0079818	1.6485	12287000	3	0	0	0	1050200	0	0	3533300	0	0	3821300	0	3881900	819120	1.98207	0.096	3.91981	4.54952	NaN	1
PfIT_110036600	ubiquitin-like protein, putative	14.1782	13.6804	12.8011	17.7365	18.259	16.1725	18.0799	19.7287	12.1061	16.883	16.3384	17.8911							1	1	1	2.6	2.6	2.6	100.9	0.0078212	1.5821	90145000	3	0	0	0	8953700	11360000	4955100	12861000	35623000	3397400	3028300	0	9966400	2198700	2.17086	0.0728205	3.83608	5.14935	0.585774	0.766648
PfIT_100018900	conserved Plasmodium protein, unknown function	12.8812	19.0873	13.8135	19.0326	19.9148	18.2205	21.5976	18.0575	18.3776	19.4417	18.4665	19.648							39	39	39	18.2	18.2	18.2	267.39	0	83.748	1238000000	108	1154300	85217000	2202800	82049000	485520000	108950000	151230000	41739000	55422000	46731000	52109000	125690000	8091600	0.887362	0.388212	3.79532	1.9042	0.84716	1
PfIT_030010400	AP endonuclease (DNA-[apurinic or apyrimidinic site] lyase), putative	11.7305	16.1635	12.6519	17.4807	18.3198	16.1046	20.7193	16.2266	17.3485	17.9565	17.1909	18.2251							6	6	6	11.1	11.1	11.1	73.226	0	8.4681	106700000	13	0	2348700	0	5852900	55245000	8139300	10470000	2453900	4787800	2254900	5340100	9804700	3334300	1.18906	0.270508	3.78639	2.52941	1.12865	0.856863
PfIT_100028900	conserved Plasmodium protein, unknown function	12.3321	17.9437	17.7718	18.2788	20.183	20.8812	19.9059	17.0616	17.8321	17.0699	17.9493	19.8528							13	13	13	9.5	9.5	9.5	170.58	0	21.265	535070000	44	0	20421000	18127000	25761000	79573000	11144000	96421000	11080000	20501000	156450000	18901000	76695000	6605800	0.876553	0.378355	3.76515	1.88263	0.482161	0.708122
PfIT_110032700	multiprotein bridging factor type 1, putative	14.3038	19.0166	19.9233	21.9643	21.3846	21.1898	24.4062	19.5397	18.4275	21.062	21.4142	20.9844							7	7	7	46.3	46.3	46.3	15.525	0	9.068	370370000	13	0	4773300	8948700	36826000	200100000	19703000	24640000	6859300	25151000	21529000	3173200	18672000	41152000	1.00519	0.359126	3.76502	2.14249	0.529495	0.706935
PfIT_120042400	conserved Plasmodium protein, unknown function	11.4498	15.5077	12.1069	17.3674	16.5786	16.4084	18.5905	13.2963	15.781	15.2061	16.3267	15.5785							4	4	4	2.4	2.4	2.4	193.48	0	3.6736	71435000	6	0	3261200	0	11836000	27632000	2646100	6851200	0	5753200	6088400	3941300	3425200	1020500	1.36121	0.225169	3.76333	2.91339	0.655486	0.842405
PfIT_100030000	conserved Plasmodium protein, unknown function	12.8385	21.3298	16.0736	19.7417	20.9014	20.7259	22.9779	19.3965	19.4722	20.6473	20.2482	19.8746							25	25	25	17.8	17.8	17.8	156.46	0	64.77	1310500000	73	0	166050000	4345000	55231000	520460000	103460000	123390000	43479000	78459000	109260000	45821000	60562000	20802000	0.673399	0.470627	3.70903	1.48336	0.636162	0.795111
PfIT_120050100	cytoplasmic translation machinery associated protein, putative	12.7328	18.1048	19.2657	19.7273	20.6793	20.7891	22.2551	19.4208	18.484	19.0681	20.247	20.2667							5	5	5	12.2	12.2	12.2	39.692	0	6.893	216010000	14	0	4228500	9454600	13020000	75082000	8244400	25188000	10528000	18665000	27178000	5499600	18922000	14401000	0.841111	0.402743	3.69749	1.81222	0.656997	0.844
PfIT_100005900	Plasmodium exported protein (PHISTc), unknown function	12.8117	18.3677	19.1216	19.8836	20.6563	20.8438	22.8919	19.025	18.0058	20.2442	20.5014	20.4289							6	6	6	17.7	17.7	17.7	32.209	0	8.5186	290050000	21	0	5412100	9126200	15477000	124530000	19871000	26441000	8535200	23751000	30110000	4211100	22586000	18128000	0.853531	0.39561	3.69422	1.83685	0.574608	0.743063
PfIT_020019200	conserved Plasmodium protein, unknown function	13.8034	16.8924	10.3974	17.0059	17.0494	18.1017	20.7482	17.8073	16.9987	19.0951	16.3517	18.8244							3	3	3	12.6	12.6	12.6	35.697	0	4.8008	74093000	7	0	2311300	0	2500500	33465000	10640000	2577100	4358000	1588900	5344500	2488100	8819700	3899700	0.900906	0.381146	3.68793	1.93128	1.03144	0.935667
PfIT_050014100	conserved Plasmodium protein, unknown function	13.1624	17.8739	12.4176	18.4713	18.5828	17.4023	20.9893	16.618	17.6519	18.8689	16.7471	17.3743							25	25	25	8.6	8.6	8.6	369.85	0	62.573	622330000	39	0	34589000	787860	52333000	299750000	68936000	56537000	14484000	15841000	24945000	29657000	24466000	4321700	0.982809	0.346352	3.66749	2.09672	0.846728	1
PfIT_100030100	conserved Plasmodium protein, unknown function	13.1274	17.5819	13.5077	17.8747	18.2458	18.8411	20.5876	17.749	18.0544	17.7132	18.0642	18.9042							2	2	2	4.6	4.6	4.6	43.497	0.0012484	2.1155	55442000	2	0	2550400	0	3124400	20484000	2793400	4041000	2863600	3563100	6104900	3538700	6378100	4264800	1.15896	0.287802	3.58158	2.46459	1.13205	0.86424
PfIT_070010400	inositol-phosphate phosphatase, putative	16.6161	17.9774	14.3511	19.6964	20.3552	19.4799	18.4978	19.1338	17.0543	17.4161	17.7433	18.5703							16	16	16	6.5	6.5	6.5	330.42	0	25.5	738820000	43	14364000	36904000	2988400	121490000	52931000	25009000	191810000	82257000	31378000	104560000	19462000	55661000	5166600	1.49847	0.198564	3.52899	3.23799	0.714819	0.912794
PfIT_130048600	conserved Plasmodium protein, unknown function	13.3012	12.1733	13.2329	15.5475	17.1288	16.564	18.2109	15.0722	13.5634	15.7032	15.8999	17.4958							3	3	3	3.4	3.4	3.4	114.13	0	7.6378	49244000	6	0	0	500620	2490300	15778000	2774200	7452100	1791300	3179400	5038000	629490	9611300	947000	2.39947	0.0561212	3.51096	5.9571	0.892798	1
PfIT_050018700	deoxyribodipyrimidine photo-lyase, putative	13.2762	14.814	10.788	16.1302	17.5812	15.6346	18.8826	16.358	13.7599	16.4873	15.7562	15.001							5	5	5	5.6	5.6	5.6	125.83	0	5.5649	67631000	8	0	1757000	0	4375200	29483000	5604000	11962000	5123800	3376000	3103200	846170	2000200	1108700	1.25011	0.244636	3.48927	2.66291	0.828659	1
PfIT_140016200	conserved Plasmodium protein, unknown function	17.109	14.019	13.2622	17.5815	18.9488	18.3071	17.6985	18.9373	15.8332	16.8824	16.9376	19.0343							5	5	5	9.1	9.1	9.1	91.878	0	6.0871	95346000	11	4947500	0	0	6864900	7444500	4228300	17711000	17570000	4393400	11352000	2043400	18792000	2724200	1.31408	0.2305	3.48242	2.80588	0.843167	1
PfIT_060015600	conserved Plasmodium protein, unknown function	12.0771	19.374	13.0577	18.6287	18.642	17.6288	21.1518	18.3537	17.2974	18.8247	16.8483	19.2226							5	5	5	7.5	7.5	7.5	76.663	0	24.486	148630000	9	0	17666000	0	10538000	60576000	12071000	10636000	8709200	3067700	5269800	4188000	15906000	5716400	0.681304	0.471053	3.46358	1.49877	0.733802	0.908381
PfIT_040015400	conserved Plasmodium protein, unknown function	17.0472	13.1775	13.9346	19.1747	18.0666	17.2975	21.4883	16.1283	16.7867	19.3044	17.2486	16.9648							10	10	10	7.3	7.3	7.3	149.99	0	47.628	267050000	16	6906900	0	798570	30181000	150040000	33019000	14001000	3653200	7941500	8215700	5766300	6523400	5236200	1.24629	0.241153	3.45981	2.65447	0.761959	0.8805
PfIT_140056400	serine/threonine protein kinase, putative	12.5817	17.69	12.7569	17.7039	18.5649	17.1258	20.1929	15.5761	13.6156	17.8689	18.0003	13.8816							4	4	4	12	12	12	43.776	0	5.104	62211000	5	0	4863300	0	4910400	27569000	5505800	8919100	1123600	6030600	3289100	0	0	2704800	0.936216	0.359773	3.45535	2.00224	0.341018	0.705201
PfIT_120033700	merozoite surface protein 9	13.4491	15.3249	14.1838	17.2039	18.1552	17.9428	20.1243	18.3112	17.3946	17.8616	17.5875	18.2565							3	3	3	3	3	3	86.157	0	3.1032	106870000	6	0	1395500	632740	5132800	38860000	8097800	9924800	11059000	6696200	8566200	5858100	10647000	3143200	2.29797	0.0601143	3.44804	5.58668	1.93992	0.449067
PfIT_120012400	conserved Plasmodium protein, unknown function	16.1581	14.2156	11.8168	18.3899	17.7908	16.2967	20.8244	15.5159	15.4449	18.5021	17.0457	15.8368							20	20	20	7.9	7.9	7.9	313.74	0	24.572	453110000	24	10165000	2644400	501460	47745000	258090000	51606000	31520000	6512600	18806000	11190000	6199800	8135300	3259800	1.15072	0.291871	3.42897	2.44694	0.665225	0.860513
PfIT_120035800	conserved Plasmodium protein, unknown function	11.0811	15.8068	14.7524	17.7638	16.6426	17.4923	19.6015	11.3862	15.4245	15.879	17.1308	13.1643							4	4	4	6.9	6.9	6.9	71.194	0	4.831	47403000	5	0	0	828010	6676500	23866000	1807900	3069200	0	4305200	5531300	1319400	0	1580100	1.0926	0.31313	3.41946	2.32382	0.224303	0.780967
PfIT_120048900	translation initiation factor SUI1, putative	14.0737	19.8587	18.2945	20.9795	19.8969	21.5853	24.6652	18.688	20.3415	22.086	21.4391	20.2013							3	3	3	26.1	26.1	26.1	12.891	0	4.169	221590000	9	0	4753700	1607600	10338000	133020000	22260000	4881500	2111700	14216000	15732000	6643000	6027800	44319000	0.884572	0.383854	3.41161	1.89863	0.702525	0.908029
PfIT_060019700	RNA and export factor binding protein, putative	11.5111	17.9743	17.2406	18.3109	20.004	18.5814	20.5185	18.268	14.9711	13.7163	19.4154	18.3296							2	2	2	14.7	14.7	14.7	18.853	0.007874	1.6072	35194000	2	0	1802500	1084000	2276300	10515000	0	7360400	2209600	4894500	2745700	0	2306000	5027700	0.736791	0.451983	3.3901	1.60705	0.378212	0.698646
PfIT_120056400	coronin	12.2655	19.1036	12.9018	18.4093	18.0566	17.9614	21.8307	19.0217	18.324	19.4625	17.66	19.4881							9	9	9	19.6	19.6	19.6	69.014	0	10.262	223140000	18	0	16336000	0	10096000	108170000	20951000	7906200	15435000	6006000	7401400	9516200	21325000	7694600	0.707166	0.465052	3.38544	1.54919	0.957134	0.943268
PfIT_130074200	conserved Plasmodium protein, unknown function	13.3471	19.9036	19.8724	21.1087	21.0399	20.9782	21.7929	19.6833	19.3584	19.3931	20.8219	20.6966							2	2	2	5.8	5.8	5.8	51.451	0	57.462	213750000	14	0	11769000	11518000	27134000	43601000	8262300	25870000	10103000	22243000	24788000	8065600	20393000	17812000	0.696895	0.463225	3.33455	1.52916	0.483894	0.714234
PfIT_020007200	gamete antigen 27/25, putative	15.6357	21.2366	17.6617	20.6768	22.2015	21.6274	24.4529	20.8646	20.1437	20.7585	20.9391	22.2514							28	28	28	28.8	28.8	28.8	141.22	0	280.03	2647500000	80	2851100	138370000	11612000	93866000	1286000000	99340000	270090000	106920000	112590000	181420000	64872000	279600000	47277000	0.914796	0.369508	3.32388	1.95913	0.797123	0.968317
PfIT_080026400	conserved Plasmodium protein, unknown function	14.3868	17.4344	17.4842	20.0881	19.0407	20.1471	22.8917	16.1849	18.6335	20.2113	18.3976	20.8477							3	3	3	17.7	17.7	17.7	14.014	0	12.081	119080000	6	0	1416900	1466700	8917100	62254000	9711900	4314300	595980	2762700	9288800	3253400	15097000	14885000	1.42491	0.216145	3.32351	3.06183	0.562468	0.738701
PfIT_090014100	exoribonuclease, putative	13.7476	17.3178	17.0048	19.1605	19.3276	19.4972	21.4778	18.0626	16.8809	18.3068	18.4657	19.213							13	13	13	12.4	12.4	12.4	155.07	0	32.707	441710000	40	880230	10456000	8416800	37502000	186920000	20752000	42110000	17521000	23169000	47360000	7724400	38892000	6901600	1.34882	0.220817	3.30505	2.88493	0.71042	0.909624
PfIT_130028400	60S ribosomal protein L6, putative	12.6473	21.4735	19.8992	20.9166	22.0526	20.9548	23.0907	20.7549	20.7997	21.5225	21.1887	21.2822							2	2	2	14.2	14.2	14.2	21.601	0.0013405	2.5763	327320000	3	0	29118000	9777800	19794000	89330000	30124000	43499000	17695000	23902000	20325000	18253000	25502000	32732000	0.529931	0.533795	3.30135	1.20341	0.555566	0.745573
PfIT_100014100	conserved Plasmodium protein, unknown function	12.5742	17.5007	12.6684	16.9656	17.9737	17.679	21.0602	16.9029	12.0533	17.2892	17.3255	17.4343							2	2	2	7.4	7.4	7.4	35.603	0	3.6485	57460000	4	0	2967300	0	2047700	34984000	2562700	4118400	1960600	2628000	3357700	0	2833800	3591300	0.930188	0.357676	3.29163	1.99009	0.324427	0.704995
PfIT_030010300	conserved Plasmodium protein, unknown function	13.3161	16.9896	11.1559	18.2173	16.706	16.3871	20.7571	16.8728	15.1294	18.0194	16.1592	16.1096							14	14	14	4	4	4	464.37	0	27.677	506200000	29	1733900	22121000	387890	51809000	301280000	45170000	18174000	20402000	12441000	14570000	6093500	12021000	2977700	0.850083	0.39734	3.28293	1.83001	0.724006	0.920787
PfIT_080031800	conserved Plasmodium protein, unknown function	11.2854	16.5387	12.0149	16.62	17.888	15.17	19.1598	16.415	15.054	16.6948	16.053	16.5583							3	3	3	4.3	4.3	4.3	88.287	0	8.0767	56760000	6	0	3808100	0	4028700	23427000	4243200	9702700	3495100	2719600	1474700	0	3860000	1419000	0.835434	0.402887	3.27967	1.80098	0.81665	0.984632
PfIT_100005200	Plasmodium exported protein (hyp12), unknown function	11.8442	17.5125	18.4846	19.0223	19.9799	18.6577	22.6835	19.8093	17.0393	19.2025	18.5378	19.833							7	7	7	33.8	33.8	33.8	27.617	0	12.59	146900000	12	0	2243800	4401500	6389400	80834000	7239500	12410000	11025000	4566900	4962700	1616200	11208000	12241000	0.709004	0.466618	3.27287	1.55278	0.671167	0.866065
PfIT_090024400	regulator of chromosome condensation, putative	13.8793	17.6992	13.3403	18.3841	18.4461	17.8458	21.2895	16.5415	18.3476	18.7321	15.9686	19.5406							28	28	28	14	14	14	397.48	0	59.093	875130000	49	0	34475000	0	55423000	415240000	70543000	57855000	15452000	10388000	38162000	54037000	123550000	5402000	1.10411	0.3105	3.2524	2.34803	0.898357	1
PfIT_010016400	Plasmodium exported protein (hyp1), unknown function	13.0726	17.3713	14.7551	17.703	19.1042	18.1372	17.3851	17.8715	14.6717	15.2075	16.9056	17.7543							5	5	5	9.4	9.4	9.4	69.809	0	17.65	60354000	5	0	4916700	801950	6187600	4964000	1097300	16343000	6954300	3560400	8360300	756880	6411700	2081200	1.15951	0.2902	3.24844	2.46577	0.420374	0.691919
PfIT_070009300	phosphoinositide-binding protein, putative	11.734	18.703	13.5048	18.5682	17.953	17.1209	18.9008	17.0275	17.6241	16.5456	17.0933	18.9397							7	7	7	9	9	9	118.76	0	93.438	141530000	15	0	21764000	0	19823000	24963000	4878600	12941000	6813100	7131200	7268900	10303000	25645000	2775100	0.690127	0.468556	3.23343	1.51596	0.672187	0.88256
PfIT_100022300	serine/threonine protein phosphatase 8, putative	12.9813	19.4854	13.2252	18.9228	18.797	17.6663	21.4164	15.7069	16.9403	19.5084	17.6208	17.6083							19	19	19	9.2	9.2	9.2	255.74	0	65.015	698280000	45	0	85144000	0	57649000	324660000	86513000	52834000	6204500	23381000	24130000	14588000	23180000	6019700	0.677863	0.471134	3.23138	1.49206	0.435383	0.687717
PfIT_120026400	conserved Plasmodium protein, unknown function	14.6405	17.4884	13.1585	18.8062	17.3198	18.8386	19.9982	16.4721	19.0492	19.851	16.2838	15.7889							5	5	5	5.1	5.1	5.1	84.208	0	5.0768	146600000	8	919480	6619800	329150	16501000	37702000	34045000	5889500	3272700	2872300	16877000	19529000	2038200	4072100	1.11072	0.306726	3.22574	2.36197	0.96799	0.949739
PfIT_070034900	EMP1-trafficking protein	11.9208	11.992	14.0151	15.9408	15.3426	16.3164	20.0006	12.0963	14.6138	16.1203	14.5355	16.6323							5	5	5	10.1	10.1	10.1	103.07	0	9.7617	77203000	4	0	0	0	3333900	55595000	3775400	2202200	0	1258600	4325200	1328900	5383800	1456700	1.91187	0.102868	3.22396	4.34032	0.530535	0.708153
PfIT_130039500	chaperone binding protein, putative	12.5999	17.6367	15.9764	17.6281	19.1859	19.0138	21.6988	14.9595	18.5481	19.04	16.9117	18.846							5	5	5	10.9	10.9	10.9	62.673	0	8.3215	124440000	9	0	3871700	1225000	3848900	64676000	10241000	11332000	605380	2342600	10057000	7282500	8953200	6549300	0.96091	0.355834	3.20496	2.05219	0.541086	0.737551
PfIT_110038400	RNA (uracil-5-)methyltransferase, putative	13.4414	18.1462	14.7324	17.8849	19.752	18.2868	20.9076	17.9093	18.0894	18.6371	19.0928	19.2234							9	9	9	12.1	12.1	12.1	101.56	0	10.588	215830000	15	0	10734000	1007200	8956000	72778000	15085000	32671000	9108300	20688000	11832000	10319000	22648000	5833100	0.991591	0.352456	3.20123	2.11465	0.968592	0.960941
PfIT_060026900	nuclear polyadenylated RNA-binding protein NAB2, putative	16.8051	16.8925	11.6844	19.0162	17.7437	18.1963	21.6365	17.5212	17.4731	18.5212	17.8136	19.4629							6	6	6	11.7	11.7	11.7	90.023	0	44.293	193610000	10	3549800	3771600	0	16437000	101060000	11663000	6804000	5831500	7141500	9310800	5640100	22402000	6245600	0.84089	0.400834	3.19143	1.81178	0.783933	0.956952
PfIT_100032300	rRNA-processing protein EBP2, putative	12.2401	13.8155	16.8861	18.2288	15.3581	18.8789	20.5433	17.6336	17.0056	18.1584	16.8172	20.0797							3	3	3	7	7	7	37.727	0	4.2563	51475000	6	0	0	1453500	3686400	18337000	3510700	0	2440200	1385600	5784700	1579000	13298000	4289600	0.846844	0.398558	3.17471	1.82358	1.09885	0.883926
PfIT_130046600	60S ribosomal protein L18-2, putative	19.6851	23.7357	22.3005	23.8983	25.9495	25.3809	25.5972	25.7493	22.6278	23.7101	24.0224	24.5327							7	7	7	34.8	34.8	34.8	21.453	0	44.338	1563900000	34	4214700	69843000	25828000	78175000	253800000	68617000	324010000	282030000	85199000	218460000	32405000	121350000	312790000	1.11711	0.297194	3.16914	2.37548	0.815552	0.97775
PfIT_030009000	EH domain-containing protein	12.8525	17.2872	13.1752	18.4186	16.7968	17.6015	22.5133	14.4718	15.5647	19.037	15.8588	17.4401							7	7	7	15.8	15.8	15.8	62.312	0	11.366	274800000	8	0	5757700	0	12614000	215520000	19365000	4098500	0	2139400	7159800	1744800	6401800	7633300	0.988497	0.349425	3.16733	2.10833	0.45902	0.696204
PfIT_130030700	conserved Plasmodium protein, unknown function	13.2811	16.4741	11.6082	17.8949	16.6655	16.2963	20.1873	15.0529	16.5527	18.029	14.7467	17.6745							14	14	14	5.2	5.2	5.2	431.69	0	19.965	407820000	23	1722100	15749000	0	42166000	206550000	46272000	17984000	5880700	4756200	13923000	16631000	36190000	2357300	0.984384	0.349654	3.16442	2.09993	0.766293	0.906922
PfIT_130046800	inner membrane complex suture component, putative	12.8404	18.2349	11.9239	17.0657	18.3558	17.0017	21.1123	14.5058	13.81	18.0455	16.6986	16.8927							5	5	5	10.6	10.6	10.6	58.043	0	5.5379	77235000	8	0	6478500	0	2880800	47605000	5681400	7044600	0	2233600	2755800	0	2555200	3677900	0.711156	0.46583	3.14132	1.55698	0.28335	0.734543
PfIT_030023500	trophozoite stage antigen	13.8545	21.6281	17.0628	20.0351	21.1646	20.7477	22.0925	19.4686	18.7572	20.9734	20.8289	11.9107							3	3	3	24.4	24.4	24.4	13.796	0.0012739	2.2682	108750000	5	0	19447000	821420	6446300	26832000	12353000	14104000	4353000	11176000	10564000	2658400	0	18126000	0.61773	0.480862	3.134	1.37494	0.451123	0.69705
PfIT_100030800	40S ribosomal protein S2	11.8076	18.4486	18.2399	18.9007	19.224	19.6579	22.3387	17.7161	19.7615	19.4114	19.0438	14.7706							2	2	2	9.5	9.5	9.5	29.856	0	17.176	122910000	11	0	4293000	3714800	5872800	63652000	8367300	7348200	2583800	6485300	9926600	10666000	0	10242000	0.63727	0.47775	3.09549	1.413	0.669386	0.864909
PfIT_110020100	conserved Plasmodium protein, unknown function	17.8929	22.6635	21.8667	23.7032	23.6441	24.3262	25.0503	22.5594	20.8117	22.9889	22.8047	23.8952							15	15	15	43.4	43.4	43.4	33.908	0	262.23	2650600000	99	4867500	132870000	76483000	273170000	694890000	166480000	262180000	123620000	146530000	420660000	36811000	312040000	132530000	0.968371	0.354458	3.08345	2.06733	0.44771	0.68622
PfIT_030015100	phosphoglycerate mutase, putative	12.7837	13.6128	11.0961	14.9875	17.0374	14.6582	19.4703	15.0022	14.5733	16.7487	15.9238	15.5813							4	4	4	3.7	3.7	3.7	137.92	0	5.45	64085000	6	0	0	0	1851700	41402000	6277100	7666900	1870600	3543300	1473700	0	0	1124300	1.36319	0.227727	3.06345	2.91795	1.04449	0.914305
PfIT_130018200	eukaryotic translation initation factor 4 gamma	13.0511	17.5879	18.012	19.1798	18.919	19.7335	24.5068	17.7417	18.3171	19.84	19.2746	20.2595							17	17	17	14.2	14.2	14.2	146.28	0	204.22	1808200000	35	517710	12018000	16125000	36226000	1454100000	57248000	30236000	13369000	38688000	53176000	19921000	76567000	29643000	0.888224	0.388298	3.06045	1.90592	0.671183	0.871763
PfIT_030009200	60S ribosomal protein L44	20.8458	26.9124	23.4134	25.6871	27.4644	27.1803	27.6508	27.2799	24.0997	24.5243	26.6697	27.1507							5	5	5	31.7	31.7	31.7	12.157	0	12.693	2404400000	43	3769200	252620000	22344000	108050000	421430000	48260000	370380000	325910000	213490000	304150000	35956000	297990000	1202200000	0.762402	0.440567	3.0534	1.65719	0.555965	0.747279
PfIT_120043400	conserved Plasmodium protein, unknown function	18.228	13.9216	10.9699	19.074	21.7143	11.4842	19.923	19.4509	20.6015	19.1984	13.8087	15.2897							3	3	3	6	6	6	202.39	0	3.677	680850000	4	25482000	0	0	45807000	82508000	49932000	285590000	59480000	0	0	132060000	0	8203000	0.338904	0.645172	3.05104	0.820045	1.2367	0.899895
PfIT_130014600	H/ACA ribonucleoprotein complex subunit 1, putative	12.7478	18.7953	19.7076	19.3867	20.5702	20.4174	21.1616	20.1614	19.0469	18.5821	19.646	21.2596							1	1	1	5.4	5.4	5.4	26.482	0.0013986	2.8039	114640000	14	0	4094300	7706100	6169100	21112000	3532000	14012000	10555000	7383800	12603000	4874700	22595000	12737000	0.616671	0.481611	3.0412	1.37287	0.600063	0.775323
PfIT_110033400	conserved Plasmodium protein, unknown function	12.1248	19.3795	14.8737	17.5394	19.3208	18.625	21.3255	18.2668	17.4461	19.0143	18.4307	17.2516							5	5	5	7.4	7.4	7.4	73.825	0	4.5619	171430000	7	0	19097000	840620	5333700	73583000	14826000	18336000	8830900	9893600	11320000	5000000	4369000	6122500	0.627671	0.476696	3.03572	1.3943	0.665158	0.855032
PfIT_110047600	translation initiation factor eIF-1A, putative	17.3742	13.1147	17.4194	19.798	17.5617	19.5967	23.612	17.6479	18.4212	20.3564	19.0258	21.9195							3	3	3	25.8	25.8	25.8	17.867	0	37.436	128780000	9	1019300	0	1051700	5469300	76924000	8054200	1160800	1232200	3202500	4757100	2106100	23799000	21463000	0.880016	0.380964	3.01601	1.88954	0.767238	0.937658
PfIT_110045500	conserved Plasmodium protein, unknown function	13.7401	18.2831	12.2143	18.0367	18.0426	17.1868	21.2007	16.0178	16.1443	18.958	17.4969	18.4963							12	12	12	10.8	10.8	10.8	120.54	0	28.378	249740000	19	0	17225000	256600	14521000	130150000	27499000	14580000	3582800	9987600	8056400	3911100	19969000	4624700	0.749264	0.448204	3.00955	1.63146	0.537418	0.726486
PfIT_070018800	transcription elongation factor s-II, putative	12.8672	16.345	15.7492	18.2415	17.5139	18.224	21.303	15.0454	15.8305	18.9183	16.5847	18.7036							5	5	5	13	13	13	46.895	0	8.7363	96764000	12	0	1748000	1156600	6508400	54334000	10404000	3930300	0	2064000	6429600	1223700	8965100	4607800	1.28127	0.232699	3.00601	2.73214	0.463874	0.697698
PfIT_030026200	protein kinase, putative	12.6572	18.2592	16.4136	19.5458	19.1244	17.6497	21.0412	13.5767	17.366	19.1074	19.0304	18.06							2	2	2	6.6	6.6	6.6	38.016	0.0013889	2.7778	67726000	3	0	3764900	1047500	9184300	25895000	6777400	6857900	0	6425400	2467500	2027000	3279300	5643900	0.792703	0.426224	2.99663	1.71668	0.223263	0.781104
PfIT_070009200	conserved Plasmodium membrane protein, unknown function	14.3035	18.4443	14.1963	19.1795	17.9368	18.7825	22.3021	16.4007	18.4738	19.5697	17.892	19.873							30	30	30	23.2	23.2	23.2	221.74	0	169.87	799350000	47	1738900	30675000	1614400	51064000	444740000	66920000	21578000	7440600	20919000	38779000	31309000	82579000	9294800	0.967082	0.353078	2.98492	2.06471	0.699416	0.905362
PfIT_110026800	conserved Plasmodium protein, unknown function	12.8669	14.923	11.9481	16.5726	17.0987	15.0203	18.7687	12.7514	14.5141	16.5592	15.1475	13.7461							8	8	8	4.7	4.7	4.7	230.86	0	7.8508	95959000	9	0	3230800	410940	10136000	46449000	10043000	14596000	0	3774700	3456300	2433400	1429000	922690	1.29722	0.22872	2.98448	2.76787	0.454376	0.695799
PfIT_100020000	conserved Plasmodium protein, unknown function	13.2703	21.5314	16.5551	19.214	20.7362	20.3428	22.6688	19.8525	19.1886	20.63	20.4538	20.6249							9	9	9	19.4	19.4	19.4	53.92	0	33.856	413690000	34	0	63652000	2022100	12770000	140020000	34077000	36682000	19880000	30160000	27925000	12547000	33957000	19700000	0.537685	0.527538	2.97869	1.21862	0.586132	0.768689
PfIT_130026000	conserved Plasmodium protein, unknown function	12.2369	16.8064	10.9141	17.7241	16.1391	14.975	20.1069	13.5137	13.7266	17.1198	16.1439	14.4274							8	8	8	6.3	6.3	6.3	170.81	0	10.948	136130000	13	0	8595600	0	16239000	84689000	10682000	5412600	0	5430800	2415400	1016700	1652500	1815100	0.689356	0.467188	2.9603	1.51446	0.367184	0.70344
PfIT_110024300	conserved Plasmodium protein, unknown function	13.937	17.9442	18.2487	19.4576	19.4433	20.079	22.5943	19.0246	19.0035	19.4253	18.8155	21.0092							12	12	12	22.5	22.5	22.5	136.35	0	18.549	702330000	30	0	12862000	15885000	36720000	322940000	35906000	36358000	27198000	23529000	56489000	26804000	107640000	13771000	0.984264	0.347509	2.95003	2.09969	0.890088	1
PfIT_050012100	rhomboid protease ROM4	12.6379	19.2873	15.0604	18.8058	18.559	18.416	21.6699	17.4984	16.3483	19.4849	18.1347	19.5086							13	13	13	20.6	20.6	20.6	86.825	0	17.084	273850000	26	0	24313000	0	17414000	126780000	27882000	14676000	7036000	10936000	13291000	3170400	28343000	7206500	0.685198	0.469627	2.93174	1.50636	0.490126	0.713762
PfIT_070009000	conserved Plasmodium membrane protein, unknown function	13.1893	18.9742	12.2716	17.6922	18.4475	17.0473	20.6339	16.1209	15.8031	18.5216	16.2994	17.4131							24	24	24	7.4	7.4	7.4	426.43	0	72.173	621950000	49	1606600	88577000	0	36426000	279850000	64725000	61487000	12258000	13872000	23295000	9834200	30020000	3616000	0.612808	0.48152	2.91733	1.36535	0.445062	0.686115
PfIT_060010700	coatomer alpha subunit, putative	14.5097	18.1629	14.8766	20.1658	18.9585	17.1708	21.2007	20.2229	17.4336	19.8309	18.4407	18.4711							17	17	17	12.7	12.7	12.7	176.49	0	29.587	573220000	44	1749500	22010000	2256100	88223000	180760000	69945000	38206000	91784000	26685000	11066000	13277000	27253000	7642900	0.939587	0.361126	2.91536	2.00904	1.09439	0.876291
PfIT_100030700	conserved Plasmodium protein, unknown function	13.2024	19.7435	15.2922	17.654	19.9555	19.3495	21.7877	17.4686	16.8832	19.3433	19.2723	19.2835							20	20	20	13.4	13.4	13.4	193.79	0	40.741	806120000	55	0	81632000	3731700	19181000	336700000	61856000	94558000	16867000	58888000	62125000	11242000	59345000	8668000	0.640528	0.479846	2.90695	1.41934	0.459971	0.697738
PfIT_050034900	conserved Plasmodium protein, unknown function	14.6614	13.127	11.2017	17.3069	15.8156	14.5773	19.8677	15.2115	13.0417	17.5071	13.4556	15.3752							12	12	12	6.7	6.7	6.7	222.35	0	16.195	138540000	13	0	849850	0	15403000	90888000	17696000	5478800	0	1067200	2322400	801070	4037500	1458400	1.07068	0.32895	2.90323	2.27794	0.606758	0.779635
PfIT_120032700	cyclin related protein, putative	17.2124	17.367	11.1356	18.9998	18.4847	16.918	21.2395	16.0452	14.7976	18.6338	17.6614	17.98							13	13	13	12.1	12.1	12.1	128.4	0	71.132	296380000	27	9415300	10481000	0	32501000	153510000	25218000	22743000	4192400	12853000	7677800	1765700	16030000	4780400	0.604883	0.482658	2.89583	1.3499	0.303397	0.706724
PfIT_130045000	conserved Plasmodium protein, unknown function	12.1955	14.4165	12.0103	16.138	16.2631	14.8978	18.5307	14.761	15.3029	15.9089	14.1955	16.1682							4	4	4	3.2	3.2	3.2	233.69	0	5.0136	80396000	5	0	2186700	0	7211600	37869000	6152400	7864700	2776500	1876200	3052800	4042400	7364100	803960	1.50721	0.197922	2.89224	3.25927	1.11028	0.870792
PfIT_140013900	pre-mRNA-splicing factor 38B, putative	11.6491	17.5204	16.7892	17.3017	19.0974	18.181	19.7981	18.0674	15.5095	17.5467	18.462	17.2663							4	4	4	5.4	5.4	5.4	81.762	0	4.0789	94657000	13	0	5451900	3284400	4685200	26437000	5552500	16266000	7965800	10472000	8618300	1352700	4571500	3264000	0.680814	0.470217	2.87382	1.49781	0.482261	0.710539
PfIT_120026000	heterochromatin protein 1	12.1008	20.3868	12.4306	16.3703	19.688	17.4633	20.7539	13.9164	18.1059	19.0657	12.2766	18.5832							3	3	3	13.2	13.2	13.2	31.018	0	5.6211	76619000	9	0	19193000	0	1186000	24754000	7682100	11825000	0	0	2530000	3949700	5498300	5472800	0.425264	0.596366	2.8678	0.99603	0.319334	0.706766
PfIT_070034800	EMP1-trafficking protein	18.0386	21.6231	20.7958	23.4381	22.8559	22.7638	25.6064	22.3497	21.8633	23.0131	22.0407	23.2788							14	14	14	24.7	24.7	24.7	232.08	0	252.09	13064000000	60	30695000	368210000	207520000	1295600000	5823700000	965030000	865380000	609310000	491840000	811900000	434900000	1160200000	114600000	1.22004	0.247791	2.86677	2.5968	0.911404	0.982105
PfIT_050029600	ribosome-interacting GTPase 1, putative	11.9523	18.2557	18.0571	18.4099	19.0775	19.3773	20.7125	16.8543	17.2599	18.2349	18.9415	19.0033							3	3	3	9	9	9	40.684	0	3.7565	120980000	15	0	6885200	5999900	7662400	37800000	6786900	12171000	2606700	11076000	14982000	3453000	11561000	5499300	0.61651	0.48	2.86655	1.37256	0.382636	0.70191
PfIT_130076100	Plasmodium exported protein (PHISTc), unknown function	13.7217	13.4536	13.0323	15.6938	17.053	16.0225	15.491	13.0899	13.7497	13.9734	13.2905	14.5892							2	2	2	6.2	6.2	6.2	43.746	0.0046458	1.7394	4344400	2	0	0	0	901050	0	0	2311700	0	0	1131700	0	0	255550	2.47846	0.057875	2.85393	6.25929	NaN	1
PfIT_110049400	serine/threonine protein kinase, putative	13.9307	15.472	15.1125	18.2557	17.7688	17.042	20.4327	15.5623	16.0144	17.6261	17.5379	15.7726							6	6	6	2.7	2.7	2.7	237.25	0	5.492	259400000	12	0	4317600	3365400	29732000	134460000	19218000	21216000	4596600	18078000	12819000	6288500	5317900	2730600	2.08846	0.0892093	2.85043	4.8806	0.702587	0.914756
PfIT_050010100	conserved Plasmodium protein, unknown function	13.3331	14.1135	11.8546	15.8536	17.7329	13.9983	20.1186	15.126	14.3197	16.7681	13.9334	15.1404							19	19	19	3.7	3.7	3.7	671.57	0	34.92	460670000	23	0	4892100	0	16342000	314190000	30804000	60125000	9869100	4317900	4516700	5643800	9968000	1669100	1.02452	0.350667	2.7612	2.18221	0.820692	1
PfIT_120034800	myosin D	12.673	12.398	11.4143	15.2395	13.6311	15.72	19.2054	14.898	13.5777	16.66	13.3836	13.728							9	9	9	4.7	4.7	4.7	270.07	0	10.393	101170000	9	0	647690	0	4642200	72540000	12426000	1522400	0	1282400	6477100	0	1628300	843050	1.66586	0.151077	2.70173	3.65978	1.00537	0.929938
PfIT_070010000	conserved Plasmodium protein, unknown function	11.4208	16.8963	11.7161	16.5817	16.4943	15.0418	19.0549	15.7696	15.0461	17.2232	15.5781	15.8995							4	4	4	4.7	4.7	4.7	110.49	0	4.5018	54712000	4	0	5366900	0	4315700	23963000	6732100	4062000	2457900	2152400	1484200	1488600	2689600	1243500	0.661006	0.468502	2.69487	1.45922	0.689799	0.916115
PfIT_040006700	reticulocyte binding protein homologue 1	15.5042	17.7687	14.7967	19.1807	18.4562	18.5081	22.222	17.8147	16.3479	20.2714	18.2693	18.2874							44	44	44	18.3	18.3	18.3	358.53	0	198	1397200000	78	7436100	35729000	4554000	95077000	782720000	202500000	57542000	36887000	50550000	59650000	13345000	51188000	8732400	1.35813	0.224044	2.69178	2.90631	0.630633	0.789609
PfIT_100023100	eukaryotic translation initiation factor subunit eIF2A, putative	13.3608	17.6882	13.6207	17.1679	18.1624	17.4079	19.993	16.8976	14.6057	17.8545	16.745	18.3297							14	14	14	7.1	7.1	7.1	275.43	0	36.508	289440000	18	0	22598000	1347700	15755000	111650000	25357000	31391000	13063000	11753000	18607000	2667700	35250000	2705100	0.873752	0.378271	2.68949	1.87705	0.469793	0.700984
PfIT_140032500	basic transcription factor 3b, putative	11.7979	19.164	19.1222	19.25	19.0018	19.8993	22.2617	18.2037	19.4205	20.0884	19.2766	20.2246							3	3	3	15.8	15.8	15.8	19.393	0.001292	2.3646	98331000	6	0	4699200	4565200	4987800	40227000	8918400	4199600	2415100	5080600	7822900	5613600	9801500	12291000	0.473275	0.5525	2.68897	1.09174	0.527064	0.705208
PfIT_130038600	transmembrane protein Tmp21 homologue, putative	12.8772	21.3266	13.2064	17.2439	19.8392	18.3781	17.4636	12.7207	18.3962	18.0118	17.776	18.7874							4	4	4	16.6	16.6	16.6	24.995	0	4.9405	58849000	4	0	28929000	0	1707300	0	2907300	10318000	0	2468800	3747700	3795000	4976800	5350000	0.396078	0.609772	2.68365	0.937193	0.0405236	0.950043
PfIT_070012800	ribosomal protein S8e, putative	11.7459	19.404	20.1873	18.1181	21.3036	19.9542	20.6261	21.2446	17.2051	17.4664	20.3552	19.4185							4	4	4	15.8	15.8	15.8	30.268	0	4.0681	134790000	5	0	7631000	13132000	3129600	17802000	1992100	28472000	27332000	14754000	11174000	1662100	7707900	12254000	0.398118	0.608136	2.67957	0.941326	0.362217	0.708962
PfIT_060006500	conserved Plasmodium protein, unknown function	12.0491	13.4524	10.1268	14.7093	14.2145	14.6938	17.4137	11.7862	11.7162	14.7372	13.9182	15.8621							2	2	2	2.3	2.3	2.3	154.52	0.0012547	2.1711	16512000	2	0	0	0	1526900	9952000	1556800	1083600	0	882430	1510600	0	0	289690	1.27778	0.234923	2.66308	2.72435	0.344481	0.706787
PfIT_080022900	high mobility group protein B2	20.0692	21.8125	21.7046	24.0557	22.9553	24.5314	27.858	22.5813	23.6809	24.7734	23.8686	25.247							5	5	5	48.5	48.5	48.5	11.534	0	94.213	1214500000	27	3300400	11049000	10253000	52314000	729840000	86032000	24398000	18826000	45952000	72745000	40345000	119460000	404840000	1.65162	0.152545	2.65203	3.62269	0.965432	0.942857
PfIT_020024600	DnaJ protein, putative	13.9155	13.7513	15.2834	16.1942	18.2327	16.4484	16.2815	17.3527	15.0015	14.3124	15.5406	14.1019							4	4	4	4.9	4.9	4.9	117.26	0	4.3069	42829000	6	0	0	2033900	3823800	4062600	0	15709000	8535600	2430900	4560600	1672900	0	839790	1.51719	0.192368	2.64165	3.28368	1.06631	0.896842
PfIT_110046300	conserved Plasmodium protein, unknown function	14.7567	17.6406	13.9217	18.6827	18.0664	17.4935	21.9281	15.2451	16.1889	18.6313	17.2224	17.2775							31	31	31	13.4	13.4	13.4	324.78	0	154.89	844790000	46	3931000	29017000	2203600	59751000	566650000	57660000	38978000	5514900	21714000	26204000	10608000	22559000	5949300	1.05372	0.334845	2.64121	2.24261	0.421992	0.693642
PfIT_040029000	Plasmodium exported protein (PHISTb), unknown function	13.4102	18.741	17.1062	18.7419	19.7124	18.6553	21.314	17.958	18.4578	19.6971	19.1725	18.9407							2	2	2	6.8	6.8	6.8	36.029	0	3.6838	111830000	10	0	6572000	2116200	6576100	39107000	12750000	12886000	3819200	8863000	6193000	5400800	7547500	7455400	0.744919	0.451	2.61741	1.62295	0.678257	0.897589
PfIT_100031300	peroxiredoxin	20.4206	24.375	23.0585	24.4989	26.2864	24.8679	26.4922	25.0403	23.5315	24.0791	23.9662	25.1675							18	18	18	32.7	32.7	32.7	43.674	0	323.31	4951600000	97	18245000	282850000	113560000	308210000	1227100000	230400000	1064000000	448550000	213060000	398050000	157630000	489910000	380890000	0.947378	0.355815	2.5997	2.02478	0.766634	0.913789
PfIT_020007300	early transcribed membrane protein 2	13.6149	20.2959	19.244	19.6252	20.0911	21.1536	22.1599	19.6873	19.4486	21.0427	19.9435	14.3941							1	1	1	11.3	11.3	11.3	11.516	0.0046838	1.766	62321000	1	0	5149200	2483500	3234800	18743000	8640300	4467500	3377000	4033200	9330800	2861900	0	15580000	0.534046	0.529015	2.57171	1.21148	0.531876	0.71478
PfIT_140065800	conserved Plasmodium protein, unknown function	13.2366	12.7684	14.4092	15.5949	17.7689	14.749	19.2891	14.8224	16.9909	19.5839	18.8349	18.3103							2	2	2	7.4	7.4	7.4	40.068	0	2.8625	51456000	2	0	0	0	0	12813000	15717000	4467000	0	9352100	0	2605100	6501300	2572800	1.17906	0.274353	2.56623	2.50779	1.21411	0.871707
PfIT_140042000	conserved Plasmodium protein, unknown function	13.1147	16.621	11.8647	16.7431	16.7273	15.773	20.8938	15.268	16.8758	19.4981	15.6311	17.8159							14	14	14	8.2	8.2	8.2	209.31	0	22.134	351380000	19	886990	10079000	0	10969000	194830000	74049000	10850000	3945700	5074800	5599600	12026000	23074000	3513800	0.807519	0.417096	2.54769	1.74585	0.802275	0.98
PfIT_070026400	rhoptry-associated leucine zipper-like protein 1	17.6794	20.6068	16.6119	20.5093	20.5247	21.4891	24.7484	20.0865	18.8964	21.556	20.1885	21.7365							17	17	17	21.8	21.8	21.8	87.878	0	34.133	1680200000	45	7766600	59082000	3705900	55222000	1042800000	114080000	55814000	41196000	44213000	108910000	18054000	129290000	45409000	0.961878	0.357381	2.54166	2.05415	0.615536	0.777854
PfIT_070023900	40S ribosomal protein S10, putative	19.693	23.0688	22.5457	23.1835	24.8979	24.8396	25.744	23.642	21.6634	23.0868	23.8832	23.4717							6	6	6	49.6	49.6	49.6	16.478	0	54.243	1366400000	37	5932900	61588000	42859000	66683000	393380000	62362000	218830000	91627000	108310000	210170000	23249000	81428000	195200000	1.0003	0.357699	2.53783	2.13247	0.53496	0.720282
PfIT_060021100	conserved Plasmodium protein, unknown function	19.4786	20.4945	22.0346	23.2205	23.0759	23.3105	26.0381	22.2191	21.7002	23.1362	23.1424	23.8458							25	25	25	38.8	38.8	38.8	52.98	0	193.35	3218000000	115	16072000	32501000	94513000	215020000	1515900000	202830000	194520000	107410000	203700000	228870000	74959000	331690000	146270000	1.56215	0.177389	2.53304	3.39489	0.785457	0.964077
PfIT_030029400	stevor	18.2468	17.9781	17.2119	20.0188	21.6992	19.2785	16.8235	15.1537	13.6811	13.0903	12.2586	14.7388							5	5	5	25.7	25.7	25.7	34.418	0	7.2317	69891000	6	3732600	3098400	1821800	12747000	0	0	40860000	0	0	7631000	0	0	5824200	1.49477	0.19762	2.51988	3.229	1.26823	0.954706
PfIT_080013100	conserved Plasmodium protein, unknown function	13.4422	16.4303	12.8418	15.9728	17.4414	16.8483	17.46	16.4801	15.1715	15.4764	16.8333	16.5591							1	1	1	0.6	0.6	0.6	162.79	0.009544	1.4513	76017000	8	823650	6535100	0	4759100	13341000	3373700	13171000	6764600	8641200	8731300	2730900	7145400	1027300	0.992415	0.356974	2.51609	2.11633	0.758557	0.874623
PfIT_140072700	transcription factor with AP2 domain(s)	10.9256	19.142	16.5482	17.631	18.6531	17.8721	19.8622	17.0519	16.3457	17.6563	16.888	18.8638							4	4	4	7	7	7	92.093	0	9.8878	105200000	15	0	17356000	2874900	6089700	28591000	6197100	12367000	4076200	3638400	7197400	2498400	14312000	3506600	0.441337	0.579938	2.5135	1.02821	0.346134	0.708885
PfIT_090017100	conserved Plasmodium protein, unknown function	16.6458	20.3997	20.6128	20.408	22.6311	22.1578	23.4625	21.4258	19.8389	20.3987	21.7698	22.3294							6	6	6	30.9	30.9	30.9	33.184	0	29.572	576780000	30	1435500	19366000	22449000	19478000	161830000	19353000	90946000	39440000	50060000	65509000	13129000	73781000	41198000	0.798036	0.420649	2.51289	1.72717	0.640078	0.814713
PfIT_140075500	shewanella-like protein phosphatase 1, putative	12.9	19.139	11.9178	16.651	17.9592	16.868	19.8959	13.4845	13.2326	17.7477	12.3372	18.0449							2	2	2	7	7	7	42.266	0.0012438	2.0988	35290000	3	0	8082400	0	1440700	13658000	3081300	3567600	0	0	1674500	0	3786000	2520700	0.473108	0.549514	2.50712	1.09141	0.101259	0.88528
PfIT_110049600	dynamin-like protein	14.3831	17.2917	17.977	18.9169	19.2189	19.0168	22.689	14.7357	19.0996	19.3079	17.7246	18.5326							15	15	15	19.6	19.6	19.6	96.487	0	36.888	480200000	25	961500	7219700	11610000	22272000	304290000	29206000	27458000	1227800	9746600	23869000	25279000	17064000	10671000	1.06313	0.328709	2.50024	2.26219	0.377014	0.700114
PfIT_080015200	protein phosphatase PPM5, putative	16.1983	16.4974	11.7733	18.2907	15.5867	18.076	22.6733	11.6588	16.3965	19.0953	16.4009	18.8197							5	5	5	9.8	9.8	9.8	63.619	0	19.021	173970000	12	1503800	1850300	0	6413100	133780000	11202000	984240	0	1730600	5526500	1725300	9253900	8698300	0.641	0.481193	2.49483	1.42026	0.231412	0.777154
PfIT_130044000	conserved Plasmodium protein, unknown function	13.7195	12.989	15.1494	15.1907	18.3982	15.7298	18.5811	15.7119	11.6395	16.2494	16.441	16.2036							3	3	3	4.8	4.8	4.8	73.206	0	3.4927	37175000	5	0	0	1163000	1196700	12549000	2493000	11055000	1717500	2846900	1739000	0	2415000	1161700	0.990559	0.350239	2.48692	2.11254	0.255641	0.752945
PfIT_110019700	cysteine proteinase falcipain 3	12.7146	21.1865	18.3448	19.0853	19.599	20.9318	23.4825	19.2937	19.485	20.365	19.6196	21.1423							6	6	6	12.6	12.6	12.6	56.665	0	8.5676	520010000	15	0	52505000	7324300	12237000	257830000	29709000	17471000	14139000	17721000	44007000	16144000	50921000	23637000	0.40915	0.599557	2.45671	0.963616	0.515866	0.707897
PfIT_010005700	ring-infected erythrocyte surface antigen	15.5185	19.1489	19.1934	19.5707	20.9403	20.6852	22.7298	19.8099	19.3224	18.0454	18.2943	16.8441							10	10	10	9.5	9.5	9.5	124.94	0	14.651	493180000	28	1549000	19183000	19783000	25697000	229540000	8927400	66403000	30331000	10608000	55637000	21635000	3882300	14945000	0.884333	0.381865	2.44515	1.89815	0.758475	0.867512
PfIT_030017600	60S ribosomal protein L26, putative	20.1833	25.0842	23.6483	23.0349	26.9507	26.2642	26.4053	25.7575	23.04	23.6035	24.8101	26.7432							7	7	7	36.5	36.5	36.5	14.812	0	323.31	1732600000	34	3571800	106710000	39445000	25783000	266620000	38237000	389120000	170180000	88251000	241780000	25873000	336980000	577520000	0.575843	0.504267	2.44468	1.29325	0.515672	0.705758
PfIT_040012400	conserved Plasmodium protein, unknown function	17.6365	22.0611	16.2767	20.7915	21.2419	21.2612	23.6215	20.1807	19.2728	21.6474	20.4009	21.1587							37	37	37	22.1	22.1	22.1	226.88	0	224.4	2888900000	131	17727000	380700000	6907100	157910000	1122800000	285780000	215760000	103400000	120450000	218660000	55108000	203670000	33206000	0.626496	0.474522	2.44009	1.39201	0.467339	0.696751
PfIT_140024100	H/ACA ribonucleoprotein complex subunit 4, putative	11.9339	18.9877	19.3782	18.8859	19.5924	19.1368	20.965	18.4327	17.0141	19.6171	18.7105	19.1417							6	6	6	17	17	17	52.941	0	10.912	199730000	8	0	14036000	18398000	13079000	55267000	21713000	21343000	9553600	11582000	15564000	3573700	15617000	7397300	0.42943	0.595345	2.43843	1.00438	0.310164	0.704727
PfIT_130028700	60S ribosomal protein L23	21.6504	25.1373	22.8948	25.2417	25.7972	25.9218	27.4159	25.6025	24.3279	23.7636	25.1888	26.168							10	10	10	40	40	40	22.092	0	196.53	3531000000	88	19750000	221420000	46794000	238040000	1074400000	85454000	349860000	305690000	229480000	381400000	126350000	452390000	588510000	1.09533	0.311766	2.42608	2.32956	0.875954	1
PfIT_050022600	FACT complex subunit SPT16, putative	13.4589	17.1285	11.5191	15.9948	16.6351	16.7228	19.3115	14.9058	16.6306	17.8429	13.5369	16.1546							6	6	6	5.7	5.7	5.7	132.52	0	7.7414	79997000	9	0	7593800	0	3460900	34484000	12460000	5394400	1626900	0	5732400	5377400	3866400	1509400	0.658571	0.465986	2.41542	1.45448	0.629245	0.78271
PfIT_070014600	lysophospholipase, putative	15.5005	19.3874	13.5809	18.8903	18.5506	18.2337	21.704	18.0471	18.8599	19.5689	19.1443	19.8191							4	4	4	10.9	10.9	10.9	42.339	0	160.53	150400000	8	834440	12345000	0	8746300	61495000	13999000	6911400	4875300	10430000	5548600	8563800	16650000	8355400	0.629428	0.476781	2.40192	1.39772	0.763986	0.889525
PfIT_070012600	E3 ubiquitin-protein ligase, putative	14.2673	17.9009	15.6564	18.488	19.0112	17.5286	20.5553	15.5846	15.5552	18.2645	17.9471	17.1118							8	8	8	8.5	8.5	8.5	107.46	0	10.77	160340000	14	0	10524000	2220800	15809000	66257000	13540000	22720000	2113000	10867000	8129800	2070400	6089900	3728900	0.983726	0.346146	2.40104	2.09859	0.260953	0.750506
PfIT_130037100	60S ribosomal protein L23, putative	21.306	24.6762	23.2547	24.9777	26.3873	25.0746	26.3326	25.3464	22.9532	24.2215	25.8424	24.1587							7	7	7	56.8	56.8	56.8	14.993	0	191.6	3434400000	39	20742000	214460000	80067000	264310000	676050000	156500000	702180000	341280000	481300000	282680000	64965000	149830000	429290000	1.04685	0.330317	2.40089	2.22837	0.571255	0.738946
PfIT_100026000	conserved Plasmodium protein (10b antigen), unknown function	14.9018	16.5487	16.3175	17.8772	19.0948	17.9924	21.0676	17.4718	16.6351	17.7699	17.7126	18.6155							21	21	21	11	11	11	264.56	0	83.142	495810000	33	3306100	10354000	8820400	26002000	237360000	24138000	60468000	19632000	23198000	28162000	10992000	43376000	4590800	1.6891	0.144656	2.39876	3.72083	0.783251	0.951057
PfIT_030013500	conserved Plasmodium protein, unknown function	14.5988	20.4575	14.7202	18.0205	19.7892	19.1594	22.1156	18.3396	17.875	20.0477	19.5992	18.3886							8	8	8	18.3	18.3	18.3	57.958	0	9.843	295730000	15	0	40316000	755760	7445000	127240000	30348000	25369000	9288400	22239000	16395000	6730800	9609300	10562000	0.52722	0.533653	2.39748	1.19809	0.534015	0.717844
PfIT_060010600	conserved Plasmodium protein, unknown function	12.7575	16.1476	12.5881	17.8115	15.5039	15.3637	20.3161	13.6204	14.3193	17.494	16.0161	15.0913							13	13	13	4.9	4.9	4.9	279.48	0	18.097	235810000	15	0	8493900	0	26915000	152730000	21597000	5436500	1473500	7753900	4933100	2391900	4084400	2015400	0.786711	0.42446	2.39525	1.7049	0.393133	0.702322
PfIT_090032100	conserved Plasmodium protein, unknown function	13.6882	15.7993	11.8853	13.4674	17.4515	17.6309	20.3735	14.5208	15.5099	15.0346	12.0878	18.4406							4	4	4	8.7	8.7	8.7	69.762	0	3.979	63802000	4	0	0	0	0	39393000	973360	5197700	681700	0	5886100	1353100	10317000	2200100	0.606544	0.483842	2.39236	1.35314	0.636364	0.799017
PfIT_060007000	conserved Plasmodium protein, unknown function	12.8011	20.3065	13.6578	18.0485	17.1204	18.7734	22.1442	15.4533	19.6475	18.7039	19.1043	21.303							5	5	5	14.1	14.1	14.1	54.654	0	9.1237	212660000	10	0	24639000	0	5150900	88066000	8113300	2707100	0	10708000	8513400	15604000	49159000	11193000	0.421592	0.598141	2.39226	0.988657	0.496229	0.707312
PfIT_020022300	40S ribosomal protein S26	22.0466	26.868	24.7356	25.5334	28.1334	27.1277	27.6442	27.3495	24.8253	25.6246	27.2224	26.5647							5	5	5	38.3	38.3	38.3	12.508	0	20.473	6812400000	43	21660000	612400000	139680000	242820000	1048800000	258670000	1472200000	855070000	782930000	733210000	148640000	496300000	1362500000	0.682221	0.470551	2.38145	1.50055	0.549045	0.733942
PfIT_060011600	spindle assembly abnormal protein 6, putative	16.3238	16.2573	12.4582	18.445	17.3582	16.3637	20.4351	15.774	16.8933	18.5213	15.3761	17.3702							7	7	7	9.4	9.4	9.4	100.89	0	23.73	115170000	9	3199100	3054900	0	13918000	55289000	14674000	6552400	2185300	1658500	3288800	4747300	6607400	2953200	0.775431	0.429714	2.37589	1.68274	0.638516	0.807523
PfIT_040026900	40S ribosomal protein S19	22.4891	25.2505	23.6467	25.4234	27.3198	25.7489	27.1952	26.2217	23.8059	25.4545	26.0982	25.4958							14	14	14	62.4	62.4	62.4	19.722	0	323.31	6656000000	127	52983000	359250000	118200000	405000000	1382900000	413810000	1507700000	704300000	646510000	507480000	131980000	425840000	739550000	1.12306	0.301569	2.36858	2.38808	0.687985	0.914114
PfIT_060013750	conserved Plasmodium protein, unknown function	13.8482	15.7242	12.2526	17.2556	15.5718	16.0677	20.0216	18.8055	13.1058	16.0978	18.5585	14.2495							11	11	11	5.5	5.5	5.5	224.68	0	16.674	216840000	12	0	5088400	0	14709000	100060000	6592500	4578200	43066000	36292000	6456600	0	0	2306800	0.98578	0.351056	2.35672	2.10278	0.646054	0.818292
PfIT_130042500	1-deoxy-D-xylulose 5-phosphate synthase	12.7593	14.4842	13.0959	15.2098	16.1395	16.0403	18.1073	14.911	14.0769	16.5434	16.3437	16.4702							3	3	3	2.7	2.7	2.7	140.17	0.0013441	2.5938	49884000	3	0	1443900	551560	2387600	17791000	6017200	4548000	1940900	5239300	4245600	0	5719400	791810	1.75116	0.13531	2.35007	3.88702	0.776284	0.948481
PfIT_130066400	protein transport protein Sec24A	10.7191	18.5154	14.4529	16.9113	16.9015	16.8214	20.937	15.7365	17.8553	17.1919	15.6848	18.178							6	6	6	8.1	8.1	8.1	106.82	0	6.2022	103150000	6	0	10866000	650370	3574700	58219000	4341900	3550100	1583200	1527500	3358500	6876600	8600500	3556900	0.441484	0.580829	2.31562	1.0285	0.596299	0.773222
PfIT_140055500	conserved Plasmodium protein, unknown function	15.3818	16.8424	12.6999	17.099	17.9311	16.8363	20.9413	14.822	17.5096	18.6604	16.5373	19.0819							10	10	10	10.4	10.4	10.4	121.04	0	15.948	211590000	14	0	6345500	0	7580500	108730000	22373000	13496000	1564100	5136000	6318600	10076000	29964000	3918300	0.855498	0.396333	2.31406	1.84075	0.577503	0.745145
PfIT_080010000	GTPase-activating protein, putative	14.6183	17.5856	17.7164	18.5014	18.5974	19.7528	21.5306	13.9264	18.0691	17.9084	19.1955	19.3631							6	6	6	16.1	16.1	16.1	56.394	0	126.46	151540000	5	0	4327300	4737900	8164000	66644000	5412300	8725500	0	13208000	19436000	6050000	14835000	6888200	0.995379	0.359299	2.31041	2.12239	0.190143	0.814122
PfIT_140068700	conserved Plasmodium protein, unknown function	14.6977	16.0688	13.2418	17.5999	17.0634	16.2367	19.7346	16.2648	14.8057	18.5842	18.3831	17.6241							6	6	6	4.7	4.7	4.7	161.19	0	4.9214	143060000	7	1567800	4055400	0	11721000	51471000	23187000	8080600	4645500	20170000	4555900	1689700	11919000	2424800	1.19009	0.269607	2.29721	2.53164	0.606589	0.775697
PfIT_010013900	transcription initiation factor TFIIB, putative	12.5474	17.3161	15.6985	13.0706	19.8564	19.5162	21.5233	14.0925	12.9417	19.3283	19.2089	19.3115							3	3	3	9.8	9.8	9.8	42.002	0	3.7529	143730000	4	0	3426700	1116700	0	63298000	13824000	19934000	0	12725000	15747000	0	13663000	6844500	0.366763	0.624699	2.29376	0.877477	0.120086	0.866989
PfIT_050006300	serine/threonine protein kinase, FIKK family	13.1603	15.7846	9.91768	17.5307	17.2301	10.9256	19.5277	16.7878	17.4907	15.6164	17.4705	16.8742							3	3	3	5.8	5.8	5.8	70.449	0	3.9999	50877000	5	0	1637000	0	5491100	21919000	0	4458400	3280900	5266600	0	5341000	3483700	1754400	0.343555	0.64343	2.2746	0.829685	1.24073	0.917405
PfIT_100025900	schizont egress antigen-1	13.3609	13.7706	12.6586	16.4749	14.6901	15.4359	19.9012	12.3917	13.4916	17.2873	12.6981	14.6604							11	11	11	6.6	6.6	6.6	244.2	0	15.811	141870000	11	0	0	0	9654700	103790000	16955000	2802000	0	0	4698800	1220900	2744900	1338400	1.68728	0.146387	2.27028	3.71601	0.351102	0.711562
PfIT_050033900	nucleolar preribosomal GTPase, putative	13.699	14.6801	15.9713	17.855	16.4336	16.8618	20.4803	14.3579	13.4775	17.8617	16.6371	13.5506							6	6	6	12.3	12.3	12.3	63.933	0	23.351	74820000	6	0	840070	2055900	7586700	46811000	7621700	2832500	0	3261300	3811200	0	0	2338100	1.35613	0.221582	2.26666	2.90171	0.224724	0.782094
PfIT_130072200	conserved Plasmodium protein, unknown function	18.1934	20.7352	21.0781	21.5684	22.1552	23.0714	24.4989	21.1108	20.8182	21.8831	21.8358	23.0578							20	20	20	26.8	26.8	26.8	77.81	0	323.31	1950500000	86	8992100	52364000	66415000	93296000	711230000	116040000	140120000	67935000	112290000	264420000	55468000	261950000	65018000	1.0532	0.332503	2.26279	2.24153	0.648881	0.820805
PfIT_140042600	conserved Plasmodium protein, unknown function	14.6977	18.9438	14.1841	17.4007	19.2354	17.9716	20.6058	18.4218	16.75	18.6697	17.8893	18.5044							20	20	20	9.4	9.4	9.4	271.76	0	25.893	566950000	40	3215400	61017000	2252300	20937000	193090000	50456000	74685000	42491000	29378000	31101000	13336000	44996000	4685600	0.635991	0.47654	2.26067	1.4105	0.637059	0.808045
PfIT_030012300	conserved protein, unknown function	15.4278	12.6615	14.7222	17.3033	16.3586	15.8671	19.3345	14.2935	12.6138	16.9895	14.053	16.7253							2	2	2	4.9	4.9	4.9	45.97	0.0013736	2.7193	24983000	2	881560	0	0	3234900	13222000	2602400	1680600	0	0	1195300	0	2166900	1249200	1.13139	0.299213	2.23918	2.40576	0.201951	0.801179
PfIT_110012600	IWS1-like protein, putative	13.5713	16.1544	16.2771	17.335	18.0066	17.3532	19.444	12.0879	12.7038	16.8045	16.7949	17.2065							2	2	2	3.7	3.7	3.7	66.152	0	3.1506	38662000	3	0	1531800	1667600	3471900	14977000	2403700	5530100	0	2387800	3516100	0	3176100	1841100	1.15346	0.29122	2.23066	2.4528	0.0828229	0.901212
PfIT_120050000	conserved Plasmodium protein, unknown function	11.9305	18.3194	18.5609	18.6011	17.5803	19.2821	21.0186	18.3519	18.2263	18.6609	19.3704	19.3022							2	2	2	10.8	10.8	10.8	26.302	0.0013699	2.7112	64491000	11	0	3271000	3867100	3976400	21243000	4144600	1959700	3345500	6777500	6375100	3066700	6464600	6449100	0.425219	0.594853	2.21756	0.995939	0.550651	0.743004
PfIT_020024100	replication factor C subunit 1, putative	15.1814	16.742	15.3588	18.0001	18.0835	17.8435	20.7939	16.718	16.4178	18.5119	17.8228	17.0378							9	9	9	10.6	10.6	10.6	104.13	0	41.069	182160000	13	1820800	5371000	2058900	12846000	89083000	18316000	13610000	5282300	11361000	11524000	4289800	6592800	3717500	1.9473	0.09904	2.21498	4.44501	0.672748	0.893757
PfIT_050032200	DNA replication licensing factor MCM3, putative	12.4099	13.3595	11.9656	15.5126	14.3939	14.4481	17.6729	13.078	14.1489	14.5923	13.6717	14.5776							3	3	3	3.2	3.2	3.2	109.02	0.0014104	2.8242	19766000	3	0	588540	0	2618000	11701000	1383300	1205500	0	0	1251700	1017300	0	352960	1.79866	0.125382	2.20652	4.01745	0.758628	0.881851
PfIT_100029100	formin 2, putative	17.8727	20.8124	17.3841	21.6541	20.6701	20.363	23.6461	19.5786	18.183	21.4642	20.8516	20.1886							20	20	20	19.7	19.7	19.7	113.43	0	32.541	1179100000	34	9840100	75496000	7013500	135310000	538250000	118620000	68406000	32102000	77579000	55292000	12201000	48995000	28759000	0.903441	0.377326	2.20603	1.93636	0.382235	0.701259
PfIT_140027850	40S ribosomal protein S25, putative	21.4554	25.3555	25.1039	24.8924	27.1823	26.458	27.0798	25.629	23.836	25.0668	26.416	25.6357							9	9	9	61.9	61.9	61.9	11.664	0	163.28	4458100000	76	17253000	257580000	216370000	186850000	851080000	210870000	913780000	311340000	537220000	553090000	89847000	312800000	743010000	0.703825	0.464711	2.20596	1.54268	0.418446	0.691232
PfIT_060010000	conserved Plasmodium protein, unknown function	14.8183	16.2767	15.1768	18.5163	17.5049	16.8381	21.0477	14.5406	15.7423	18.919	16.5553	16.6725							14	14	14	14.6	14.6	14.6	123.43	0	19.414	195840000	17	1502300	4128400	1926100	19496000	112720000	25774000	9671700	1239200	5007700	6092300	2850300	5431300	3766100	1.54276	0.180811	2.19581	3.34665	0.340755	0.703498
PfIT_090035700	elongation factor Tu, putative	12.8438	14.2409	13.0053	15.2942	15.1151	16.2657	18.8775	14.3859	12.3805	12.6632	16.7805	15.5088							3	3	3	3.2	3.2	3.2	107.45	0	3.944	39200000	6	0	0	0	1928600	23118000	0	1703400	1027600	5403200	3781900	0	2238000	816670	1.74317	0.135186	2.19498	3.86536	0.39715	0.70065
PfIT_020014700	60S ribosomal protein L37ae, putative	22.378	26.3056	24.5441	25.5848	27.6705	26.5535	28.0791	26.4347	24.7878	25.4064	26.664	26.2755							5	5	5	43.8	43.8	43.8	10.799	0	29.264	4442300000	49	21803000	331760000	97853000	201300000	1134300000	177890000	854480000	362830000	425320000	393980000	115860000	324910000	1110600000	0.787355	0.425369	2.19369	1.70617	0.613786	0.777072
PfIT_070016400	regulator of chromosome condensation, putative	15.4674	16.6817	17.6212	17.7741	19.4635	19.0936	21.6065	17.1808	16.5884	18.7022	18.6517	19.2383							10	10	10	17.6	17.6	17.6	78.866	0	15.881	195910000	13	1313800	3048500	5846600	6500400	92598000	12369000	20965000	4308500	11943000	16224000	2857700	17934000	6755500	1.27105	0.23741	2.18701	2.70935	0.476492	0.706448
PfIT_120009300	nucleosome assembly protein	12.4337	18.2679	11.3541	16.9429	18.2426	13.4002	20.3565	17.1232	17.2516	18.4302	11.798	18.3481							1	1	1	3.5	3.5	3.5	40.487	0	9.2848	49279000	1	0	5050200	0	2015800	21479000	5651700	4962500	2284100	0	0	2496800	5338800	3079900	0.348835	0.643688	2.17669	0.840602	0.817392	0.993149
PfIT_110022200	conserved Plasmodium protein, unknown function	13.5253	16.399	11.292	14.9171	17.1795	15.6409	19.7228	13.0682	15.6879	16.8806	16.6345	14.4734							7	7	7	5.4	5.4	5.4	174.23	0	20.771	119890000	11	0	6999700	0	2506000	70087000	9773200	12024000	0	8240900	4138700	4275600	1842500	1480100	0.600023	0.481368	2.17375	1.34043	0.424283	0.69171
PfIT_120051000	epsin, putative	12.7485	20.9753	18.2647	19.0669	20.4078	19.024	22.2769	18.6222	14.8283	19.9756	19.5426	18.4543							5	5	5	13.2	13.2	13.2	49.699	0	12.197	199820000	18	0	32985000	5039100	8786600	81309000	16496000	22258000	6456000	12219000	8529600	0	5746700	12489000	0.368565	0.62428	2.17007	0.881169	0.142744	0.859024
PfIT_140020900	60S ribosomal protein L10, putative	22.3415	26.126	26.1898	25.7098	28.6254	26.8251	26.0492	28.9126	24.3301	23.9481	27.695	27.1297							15	15	15	55.3	55.3	55.3	25.216	0	323.31	17191000000	64	53145000	732340000	765430000	548800000	694390000	161840000	4141000000	5053000000	2172900000	1188900000	210910000	1468400000	1719100000	0.639331	0.478174	2.16765	1.41701	0.347201	0.711388
PfIT_110038300	conserved Plasmodium protein, unknown function	12.2629	14.5178	12.3114	14.8495	14.5798	16.1535	16.1345	14.3672	13.8151	13.9366	13.9781	14.222							1	1	1	1.1	1.1	1.1	119.89	0	6.4533	7556100	2	0	0	0	1121800	2733700	0	930550	0	0	2770000	0	0	198840	1.14536	0.29328	2.16359	2.4355	0.787172	0.97134
PfIT_130037500	conserved Plasmodium protein, unknown function	18.4162	21.3431	16.5212	21.6549	20.8137	20.2959	23.8562	19.7355	19.7154	20.7187	19.883	20.9166							16	16	16	18.2	18.2	18.2	113.55	0	137.31	1525300000	74	17141000	130350000	4608500	161800000	744110000	84554000	90312000	42773000	47379000	63080000	42182000	96988000	31128000	0.673242	0.468897	2.16137	1.48306	0.523958	0.701373
PfIT_140044900	metacaspase-like protein	13.7929	17.8373	13.5731	17.4007	17.8861	16.3444	20.2771	16.1241	15.7309	17.7052	17.1961	16.7103							12	12	12	6.6	6.6	6.6	236.28	0	18.488	273160000	18	1476100	24356000	1267500	17996000	132140000	22223000	25193000	7427800	15617000	8653300	5655800	11152000	2626500	0.665789	0.467362	2.14265	1.46854	0.502528	0.713749
PfIT_080006400	Plasmodium exported protein (PHISTc), unknown function	17.3889	21.4249	19.0957	21.1901	22.3539	20.7913	22.3846	21.8116	18.1635	20.0525	20.9569	21.9288							22	22	22	25.1	25.1	25.1	142.71	0	134.67	2166600000	112	12528000	205530000	40898000	174650000	399720000	79380000	391300000	268700000	148590000	132480000	21432000	291450000	29680000	0.784091	0.420978	2.14193	1.69975	0.348732	0.713261
PfIT_100020400	glycophorin binding protein	17.7027	18.4708	19.1671	19.866	21.3776	20.5209	22.9559	19.4002	18.5375	20.4865	19.9105	21.5139							13	13	13	65.3	65.3	65.3	95.843	0	70.987	1260500000	61	12799000	21798000	35321000	57335000	488170000	88144000	163470000	41515000	59131000	90273000	22830000	179680000	21008000	1.61106	0.156057	2.14126	3.51831	0.582645	0.763005
PfIT_030021600	40S ribosomal protein S15A, putative	22.0431	24.5336	24.4043	25.2286	26.4996	25.6369	27.3465	25.4028	23.9546	25.0488	25.8	25.4799							11	11	11	72.3	72.3	72.3	14.873	0	28.945	4867100000	81	34573000	194280000	177630000	314530000	1365200000	277680000	759060000	354890000	467370000	417420000	130060000	374360000	608380000	1.122	0.299267	2.12806	2.38583	0.681106	0.903917
PfIT_120050400	kinesin-13, putative	12.479	16.3222	14.4531	14.9785	18.0028	16.6565	19.202	16.8253	14.1508	14.2614	16.3149	17.9472							5	5	5	3.8	3.8	3.8	152.95	0	5.889	97226000	11	0	4997900	1368200	1969300	36787000	1197900	16022000	7083000	4972900	6301300	1109600	15417000	1593900	0.685011	0.467848	2.12785	1.50599	0.558371	0.74519
PfIT_080010800	serine/threonine protein kinase, FIKK family	12.9893	16.3319	12.2344	14.0185	18.5071	15.4053	18.5856	12.2621	16.0102	16.2721	17.3523	15.1551							7	7	7	4.8	4.8	4.8	170.44	0	6.4074	93046000	8	0	6104200	0	1228100	29110000	5856300	27569000	0	12383000	3211300	4884100	2700100	1257400	0.508754	0.534874	2.12509	1.1618	0.326366	0.706311
PfIT_090008600	60S ribosomal protein L32	22.6128	26.6783	25.5175	25.5425	28.0576	27.5594	28.0276	26.8108	25.1485	25.4497	26.8284	26.5823							9	9	9	46.6	46.6	46.6	15.526	0	19.086	6909300000	58	32070000	536940000	240160000	244360000	1368100000	229130000	1396800000	588600000	595850000	988930000	185960000	502400000	1381900000	0.67037	0.470652	2.11695	1.47746	0.515446	0.700625
PfIT_120033400	NIMA related kinase 1	13.1885	15.6577	14.419	15.8214	18.2959	15.4671	18.5932	13.3496	14.4236	12.9925	15.1816	14.6362							2	2	2	1.6	1.6	1.6	124.93	0.0012077	1.9564	38182000	3	0	2119400	898100	2374100	16214000	0	13195000	0	1523700	1857100	0	0	931260	0.858937	0.391586	2.10641	1.84758	0.231623	0.778769
PfIT_040022700	conserved Plasmodium protein, unknown function	13.6816	17.521	16.4362	18.5859	17.8668	17.4895	19.8209	15.4017	14.7163	16.8851	18.1829	14.3287							1	1	1	1.3	1.3	1.3	116.98	0.0013587	2.6799	97521000	1	0	7523100	3546800	15739000	37045000	4841700	9560800	0	11903000	7360900	0	0	2438000	0.819733	0.415665	2.10115	1.76995	0.144845	0.856201
PfIT_120032000	conserved Plasmodium protein, unknown function	11.0622	19.2694	16.2849	16.4394	17.7397	18.6583	21.1892	16.6594	17.2766	17.0092	19.2059	17.4844							2	2	2	3	3	3	57.333	0.0094937	1.412	125170000	2	0	15798000	1996100	2221700	59779000	3297700	5471800	2587700	15118000	10343000	3969300	4584400	5006600	0.346139	0.642382	2.07362	0.83503	0.436178	0.69206
PfIT_120041000	clustered-asparagine-rich protein	19.6516	21.768	21.4218	22.5145	23.3106	23.2327	25.1955	22.1171	21.4934	22.9362	23.0822	23.4012							10	10	10	28.5	28.5	28.5	51.19	0	105.76	1395800000	59	10707000	46427000	36522000	77889000	499520000	104340000	135250000	59136000	115440000	128140000	38380000	144010000	107370000	1.37652	0.230345	2.07212	2.94872	0.685848	0.913645
PfIT_050024900	conserved Plasmodium protein, unknown function	19.5912	23.0803	21.9218	22.1924	24.8324	23.7465	24.5863	24.1971	21.5767	22.1062	23.6512	23.4672							7	7	7	35.4	35.4	35.4	22.734	0	39.338	1252900000	46	7108400	79819000	35756000	43135000	226700000	40632000	268870000	173100000	118560000	126660000	28149000	104370000	139210000	0.737445	0.453356	2.05938	1.60833	0.619335	0.786497
PfIT_120051500	conserved Plasmodium protein, unknown function	12.9021	15.2529	11.9288	15.9575	15.0559	15.2052	19.1416	13.3879	13.913	16.4351	12.8936	14.4661							3	3	3	3.7	3.7	3.7	104.01	0	5.2541	31976000	5	0	1483800	0	2418000	21978000	3366900	1294400	0	0	1435500	0	0	841480	0.932298	0.360294	2.04493	1.99434	0.435548	0.689751
PfIT_070028100	conserved Plasmodium protein, unknown function	12.8979	15.8805	14.3164	15.6517	18.0203	15.5435	19.0788	12.3016	14.121	15.7863	15.4351	15.8363							3	3	3	3	3	3	143.7	0.0013532	2.6508	69424000	4	0	3559200	1203600	3037300	32669000	3334200	15686000	0	2613800	2817700	1051300	3451900	1176700	0.798144	0.422552	2.04026	1.72739	0.134362	0.861647
PfIT_100036000	mRNA-decapping enzyme subunit 1, putative	15.4423	17.3158	15.7332	18.6861	17.8223	18.097	20.9217	15.9281	16.9407	17.7621	17.7567	18.1157							6	6	6	7.2	7.2	7.2	137.58	0	12.876	200820000	10	2181600	7993800	2669000	20666000	97332000	10892000	11356000	3055100	10851000	13738000	6163600	13918000	4098300	1.48584	0.1967	2.03804	3.20737	0.468731	0.702523
PfIT_030007300	cytoadherence linked asexual protein 3.1	16.047	19.715	12.5197	17.7537	18.7748	17.8645	19.3897	17.0701	17.3421	18.5739	16.8593	18.205							12	12	4	9.7	9.7	3.7	167.26	0	14.206	265600000	25	4942700	62823000	0	16133000	50141000	28485000	32743000	10045000	8679200	17421000	12129000	22059000	3638400	0.411824	0.600723	2.0371	0.969006	0.346351	0.710365
PfIT_090026600	ubiquitin-like protein, putative	15.7721	18.7452	14.9681	19.1534	18.387	18.0399	20.9235	16.624	14.8154	18.1471	18.4548	16.8241							9	9	9	6.7	6.7	6.7	181.92	0	31.962	239570000	19	2910000	22850000	1666600	30322000	103420000	15094000	17825000	5251900	18683000	14014000	1499300	6033600	4607000	0.784322	0.422825	2.0316	1.70021	0.168831	0.830061
PfIT_040021200	small GTP-binding protein sar1	13.2509	20.0535	16.6436	17.7339	19.5938	18.6855	22.1409	17.9583	18.9263	18.8698	18.6335	19.9135							3	3	3	21.4	21.4	21.4	22.02	0	5.5206	128340000	11	0	14146000	1330900	2833900	60121000	6227500	10286000	3310800	5286600	5480600	6476400	12838000	9872200	0.42379	0.594704	2.02173	0.993072	0.577048	0.742842
PfIT_140066700	60S ribosomal protein L29, putative	22.4248	24.0845	23.8308	24.993	25.7138	25.6708	27.1133	25.1087	23.878	24.1941	25.2504	25.4125							2	2	2	13.4	13.4	13.4	8.0144	0	2.8684	961460000	14	11261000	35579000	29843000	66784000	290370000	38387000	110060000	72362000	79827000	106830000	30835000	89320000	480730000	1.62441	0.149275	2.01249	3.55246	0.827992	1
PfIT_140007700	Plasmodium exported protein, unknown function	16.5672	16.2471	15.8822	16.715	21.4677	16.518	16.8856	13.2021	16.2419	15.9913	16.5381	17.2864							2	2	2	7.6	7.6	7.6	31.38	0.001297	2.3846	50123000	1	1262300	1011200	785150	1398600	1574000	846850	37702000	0	1237100	1220000	1007500	2078000	3855600	0.542365	0.525707	2.00142	1.22779	0.274586	0.737255
PfIT_100028000	chromodomain-helicase-DNA-binding protein 1 homolog, putative	13.7628	17.4251	15.77	17.9153	18.1828	16.8607	20.4301	15.8849	15.6565	17.3927	16.6211	17.1361							20	20	20	7.1	7.1	7.1	379.91	0	35.378	404910000	38	1973900	24990000	7934800	35101000	200620000	24435000	42253000	8592700	14314000	16899000	7334500	20454000	2851500	0.817377	0.414815	2.00031	1.7653	0.372168	0.700062
PfIT_030008900	inner membrane complex protein 1e, putative	17.7323	22.7886	16.6	20.9411	21.3967	20.7634	23.7782	19.9409	19.0687	22.0134	20.9575	21.0825							10	10	10	24.2	24.2	24.2	61.73	0	67.747	1040800000	41	5879200	195620000	2681900	54360000	388410000	114300000	74543000	27176000	54981000	48061000	14846000	59957000	38549000	0.448619	0.572637	1.99346	1.04274	0.324658	0.7064
PfIT_130020600	conserved Plasmodium protein, unknown function	18.1042	20.7202	12.3746	18.7293	19.6661	18.7786	21.6559	18.9349	18.5491	19.2422	16.749	18.6882							3	3	3	7.3	7.3	7.3	56.342	0	17.169	208540000	8	6480800	39730000	0	9995700	75998000	14263000	19135000	11527000	2533300	10343000	8822200	9714700	9067100	0.330267	0.651814	1.9917	0.802088	0.426447	0.693353
PfIT_120011600	eukaryotic translation initiation factor 3 subunit C, putative	14.3315	17.0859	16.7185	18.933	17.9408	17.2183	21.16	13.4921	17.6441	19.7969	16.6852	19.1335							7	7	7	7.3	7.3	7.3	116.03	0	8.577	216930000	13	0	5703600	4421600	20520000	96072000	37347000	10316000	0	4320400	6251700	8397900	23580000	5291000	0.931542	0.358989	1.98539	1.99282	0.228316	0.78024
PfIT_080020800	vacuolar protein sorting-associated protein 9, putative	13.8645	16.5771	13.7676	17.3511	16.5392	16.2191	21.2038	14.0596	18.0757	18.5178	15.2571	18.9872							19	19	19	11.9	11.9	11.9	213.93	0	26.954	356200000	25	1297600	8506100	0	14545000	210140000	32655000	8285400	1485500	3406900	6636900	24036000	45211000	4094300	0.938029	0.361097	1.96676	2.0059	0.602147	0.779377
PfIT_090028400	RNA-binding protein, putative	19.315	22.968	21.6781	23.3262	23.9983	22.5334	25.3061	22.7169	21.0608	23.062	23.5076	23.0604							5	5	5	31.2	31.2	31.2	22.979	0	64.126	1381100000	42	7174200	90251000	36910000	115690000	456320000	96325000	184340000	75832000	131180000	66775000	24061000	96221000	125550000	0.788659	0.426357	1.96564	1.70873	0.44975	0.69216
PfIT_080022600	conserved Plasmodium protein, unknown function	15.7532	21.5204	17.4002	19.2542	20.7763	20.4857	22.3263	20.3707	19.4297	20.5416	19.9496	20.4752							9	9	9	11.4	11.4	11.4	113.13	0	18.517	811500000	37	2430200	132360000	7611200	27514000	231390000	67159000	79018000	59656000	44554000	64604000	31073000	64136000	18443000	0.475251	0.553486	1.94745	1.09565	0.577706	0.747616
PfIT_070011300	60S ribosomal protein L37	22.146	25.5512	24.0341	24.4749	26.8113	26.2512	26.8681	25.9286	24	24.2183	25.7474	25.4048							4	4	4	31.5	31.5	31.5	10.539	0	11.321	3076700000	25	23205000	245840000	85889000	116590000	612460000	97591000	588790000	319340000	281650000	399360000	83884000	222120000	615340000	0.732371	0.451391	1.93538	1.59841	0.580116	0.755333
PfIT_110014800	asparagine-rich antigen	18.266	21.0217	21.5829	21.2233	23.0767	22.3619	23.8399	21.5898	20.6351	20.9231	22.2263	22.478							37	37	37	30.2	30.2	30.2	172.2	0	266.17	3781700000	136	21751000	146900000	216740000	168930000	1036100000	137200000	610430000	217790000	338550000	371930000	112360000	403100000	54808000	0.767151	0.436483	1.93043	1.6665	0.548044	0.734777
PfIT_010007800	ubiquitin carboxyl-terminal hydrolase 1, putative	14.2897	18.6797	16.359	18.5955	18.2658	18.2506	20.8724	16.5963	15.0557	18.6187	17.8627	16.1245							29	29	29	9.9	9.9	9.9	410.31	0	43.317	746030000	46	3464800	72644000	14541000	68525000	332110000	69638000	54526000	17140000	41233000	53953000	5891800	12360000	4312300	0.689345	0.465405	1.92781	1.51444	0.189311	0.814871
PfIT_060008400	conserved Plasmodium protein, unknown function	16.6791	18.6464	19.0163	19.4588	20.3947	20.2541	22.693	18.956	18.2834	19.6072	19.6646	20.6228							40	40	40	15.7	15.7	15.7	334.09	0	150.82	1860200000	127	12801000	50057000	64691000	87913000	827230000	97435000	168170000	62042000	101390000	152570000	38924000	196990000	15248000	1.15626	0.286459	1.92194	2.45879	0.528747	0.705515
PfIT_110011900	polyadenylate-binding protein-interacting protein 1, putative	15.976	18.0852	17.5382	18.6927	19.6239	19.0315	21.5037	17.7479	17.0938	18.5099	18.6528	19.3997							24	24	24	8.7	8.7	8.7	379.58	0	73.108	938660000	59	8507900	36709000	25125000	55929000	392510000	49274000	106650000	29055000	54405000	70733000	18464000	91300000	7111000	1.30481	0.231959	1.91621	2.78496	0.450289	0.69446
PfIT_110038900	conserved Plasmodium protein, unknown function	11.9324	14.4229	12.9991	17.0951	14.2101	13.7939	17.8058	13.6273	13.239	16.2883	14.4448	15.2958							4	4	4	2	2	2	262.85	0	5.4271	70106000	2	0	2613900	0	16660000	27266000	9523700	2255400	1505900	2653700	1690200	1150500	4786800	589130	0.68957	0.468508	1.9149	1.51488	0.471066	0.701434
PfIT_010011500	conserved Plasmodium protein, unknown function	18.1897	19.565	17.2756	20.7511	19.8128	20.1971	23.048	19.126	18.441	20.6117	19.4432	20.5364							37	37	37	20.9	20.9	20.9	250.83	0	254.97	1651600000	84	26610000	69032000	14120000	157070000	771850000	142600000	81968000	50919000	63443000	106980000	31672000	135350000	18558000	1.24745	0.241091	1.91023	2.65704	0.51635	0.711985
PfIT_060016200	leucine-rich repeat protein	16.7538	17.4788	15.8773	18.5736	18.8536	18.3851	21.4637	18.3978	18.5935	19.4288	16.5429	19.7376							20	20	20	11.9	11.9	11.9	219.54	0	45.844	556310000	33	8951000	14795000	4875500	31600000	234270000	57165000	38369000	27976000	7733600	27730000	32040000	70810000	6868100	1.77007	0.125333	1.9008	3.93861	1.19541	0.864273
PfIT_010010100	ras-related protein Rab-5C	12.657	21.938	18.7027	19.3332	20.0356	19.5641	20.9666	19.6116	20.8141	19.6246	19.5464	21.831							3	3	3	20.6	20.6	20.6	24.3	0	6.6199	220390000	19	0	52231000	5546400	8586700	26638000	10508000	13973000	10414000	9954100	10077000	23967000	48497000	16953000	0.276628	0.712924	1.87845	0.688662	0.417266	0.692331
PfIT_120043000	calcyclin binding protein, putative	16.7564	21.6816	19.367	23.2991	19.8484	20.2884	23.7303	20.6752	21.0023	21.2809	19.7145	22.7276							7	7	7	31.1	31.1	31.1	26.643	0	14.09	536910000	15	1328600	40364000	8113900	123860000	167010000	30575000	11328000	20093000	10324000	15368000	25205000	83345000	44743000	0.451906	0.571076	1.87694	1.04929	0.667852	0.861548
PfIT_020018600	protein transport protein SEC31	16.978	20.0487	17.8676	20.5422	19.493	20.4849	23.0335	17.8645	19.888	21.3869	19.0307	21.0197							19	19	19	15	15	15	166.49	0	323.31	1243400000	57	7874600	66163000	14588000	93139000	523740000	167270000	45010000	14557000	32670000	89519000	59183000	129690000	20384000	0.898212	0.382968	1.87526	1.92589	0.485813	0.712706
PfIT_060033300	amino acid transporter, putative	12.4041	18.886	15.6616	16.8326	18.1455	17.5977	19.0039	17.3941	16.3494	17.184	16.6399	16.8197							2	2	2	3.5	3.5	3.5	68.797	0.0013793	2.7378	43500000	2	0	9204900	984800	2217400	9988700	2829100	5509500	3272500	1940200	3768600	1586400	2197700	2289500	0.41816	0.596872	1.87469	0.981759	0.404582	0.696223
PfIT_070015500	60S ribosomal protein L34	24.8609	27.2685	27.0298	27.0412	28.8267	28.882	29.0031	28.3333	26.9495	26.8467	28.475	28.4333							5	5	5	26.7	26.7	26.7	17.351	0	33.225	16501000000	49	152350000	808360000	685090000	690550000	2690100000	603450000	2380500000	1691000000	1865500000	2473600000	648000000	1812400000	3300200000	0.890241	0.389027	1.86358	1.90995	0.810298	0.976247
PfIT_130060300	conserved Plasmodium protein, unknown function	11.8486	13.3234	14.7137	14.875	16.0345	14.5559	18.7601	13.1205	13.2582	16.1368	14.7849	15.9519							3	3	3	5.2	5.2	5.2	76.676	0	4.617	20440000	3	0	0	0	871430	12876000	2089600	1946600	0	818640	0	0	1838200	704830	0.923152	0.359011	1.85993	1.97592	0.358842	0.712535
PfIT_070025800	40S ribosomal protein S5, putative	22.5175	25.1089	23.4984	24.6027	26.7142	25.3588	26.3388	25.8313	23.6493	24.6481	25.7329	24.9998							12	12	12	48.7	48.7	48.7	21.863	0	160.74	5059800000	69	60042000	361850000	118500000	254780000	848710000	262910000	1101000000	597050000	557660000	430290000	131570000	335490000	505980000	0.883398	0.381732	1.85033	1.89629	0.630065	0.785341
PfIT_090005300	rifin	12.8527	13.4893	11.6963	14.6535	16.0209	12.8489	22.6825	23.9755	19.882	14.9187	12.5147	12.6025							10	8	7	31.8	27.5	25.3	41.414	0	20.128	412410000	12	0	0	0	0	114430000	0	1130400	280420000	0	0	16426000	0	24259000	0.798595	0.424473	1.82835	1.72828	2.708	0.211333
PfIT_080019000	60S ribosomal protein L13-2, putative	22.7013	25.7901	24.5171	24.4654	27.2759	26.7469	26.8772	26.8092	24.5221	24.6644	25.711	26.2204							15	15	15	54.4	54.4	54.4	25.441	0	56.909	9741500000	106	81839000	696280000	288120000	277980000	1479200000	319100000	1950000000	1411100000	659130000	1351400000	289120000	938240000	811790000	0.665846	0.469062	1.82654	1.46865	0.663332	0.849333
PfIT_110030700	40S ribosomal protein S18, putative	21.9991	25.3091	24.0476	24.5856	26.8778	25.3631	26.6374	26.4716	24.1756	24.8791	26.2004	26.6231							8	8	8	51.9	51.9	51.9	17.891	0	323.31	5459900000	57	33535000	332580000	138720000	201410000	835130000	246860000	986580000	744450000	616890000	345250000	151590000	826880000	682480000	0.707854	0.466912	1.82355	1.55054	0.72378	0.913594
PfIT_130013000	tripartite motif protein, putative	12.0459	16.7528	12.3141	14.6653	16.0133	15.8912	19.9944	14.4528	14.252	17.3806	11.788	11.5204							8	8	8	10.5	10.5	10.5	105.26	0	9.9252	74499000	9	0	5411200	0	1273200	51180000	8361200	3240900	1098800	0	2978000	956060	0	1520400	0.50129	0.542655	1.81901	1.1471	0.449147	0.690412
PfIT_080028200	RNA-binding protein, putative	21.4631	22.6932	22.2506	23.8525	23.865	24.1378	26.3553	22.8629	22.5492	23.5857	23.9893	24.4928							12	12	12	49	49	49	32.441	0	323.31	2808200000	73	37581000	88163000	64867000	196910000	1116100000	163660000	198630000	99165000	216490000	239970000	79788000	306920000	216020000	2.09069	0.0913333	1.81617	4.8877	0.633194	0.797436
PfIT_130020700	zinc finger (CCCH type) protein, putative	17.0911	18.6622	18.4657	19.8795	19.8959	19.8815	22.7375	19.3467	18.4205	20.595	19.7183	20.6505							3	3	3	8.8	8.8	8.8	47.962	0	43.761	207030000	15	1815000	5393100	4706200	12540000	90911000	20591000	12683000	8667200	11214000	12556000	4561000	21398000	15926000	1.66881	0.153438	1.81261	3.6675	0.679002	0.90069
PfIT_100007700	40S ribosomal protein S20e, putative	21.7995	24.9461	24.5839	24.5705	26.3489	25.8254	27.2785	24.9396	24.2544	24.9146	25.7813	25.8238							7	7	7	40.7	40.7	40.7	13.513	0	12.979	2378600000	40	14600000	129300000	100590000	99659000	651200000	126510000	341880000	128710000	230670000	237840000	80049000	237570000	594640000	0.735201	0.451535	1.80509	1.60395	0.563203	0.744681
PfIT_100007800	inner membrane complex protein 1c, putative	17.1245	21.4721	11.6491	19.2582	19.1928	17.1775	22.4446	18.5526	17.3207	21.0177	16.9537	20.0908							6	6	6	29.5	29.5	29.5	32.653	0	9.2914	238840000	16	2429100	49455000	0	10659000	97041000	36091000	10188000	6536400	2157700	2519900	2782900	18983000	14050000	0.242231	0.751721	1.79424	0.613876	0.344638	0.708294
PfIT_100010300	DNA/RNA-binding protein Alba 3	13.5638	22.2997	12.4509	12.6905	21.9359	19.0092	21.8718	18.9382	13.0622	18.9414	19.6158	20.1653							4	4	4	59.8	59.8	59.8	11.977	0	16.072	132200000	11	0	41301000	0	0	30702000	4027300	32096000	4018400	6427300	4221100	0	9407400	16525000	0.160901	0.824863	1.77374	0.428435	0.173194	0.828862
PfIT_050037000	Plasmodium exported protein (PHISTb), unknown function	19.5659	21.8438	19.692	21.8203	22.7903	21.7583	23.3671	21.4581	19.9977	21.5158	21.7394	22.3748							10	10	10	22.2	22.2	22.2	60.118	0	32.078	1350700000	50	22508000	109150000	24562000	107390000	313750000	86953000	210360000	83546000	101540000	102880000	30361000	157720000	46576000	1.01588	0.356617	1.75576	2.16442	0.433952	0.687035
PfIT_140081100	trailer hitch homolog, putative	16.5212	21.2853	19.8752	19.6383	22.8258	20.4826	21.9538	21.1616	19.5372	20.3034	21.2689	21.8221							12	12	12	51.5	51.5	51.5	38.569	0	44.976	532460000	57	1787000	48559000	18272000	15505000	77178000	24585000	141250000	44568000	48010000	27837000	14456000	70445000	28024000	0.442026	0.581351	1.75496	1.02958	0.450993	0.694879
PfIT_020015500	conserved Plasmodium protein, unknown function	21.059	23.1185	22.6003	22.9849	24.796	24.2576	25.529	23.8159	21.9373	22.7953	23.8336	23.4975							7	7	7	16.9	16.9	16.9	32.541	0	81.059	1234900000	40	15293000	63745000	44509000	58110000	338910000	50952000	203910000	103370000	104650000	140400000	28112000	82902000	176410000	1.00449	0.356763	1.75361	2.14105	0.550328	0.741462
PfIT_040020300	60S ribosomal protein L15, putative	23.0381	26.153	24.3848	24.887	27.5196	26.4291	26.6713	26.7061	24.4774	24.6048	26.257	25.844							9	9	9	36.1	36.1	36.1	24.134	0	71.671	7421100000	84	77519000	671550000	197150000	279240000	961820000	229630000	1731700000	985310000	721750000	813160000	210230000	542070000	824570000	0.673477	0.47237	1.75325	1.48352	0.540661	0.734992
PfIT_140032400	60S ribosomal protein L21	23.1084	26.8184	24.6109	25.1602	27.6312	26.9822	27.3365	27.1871	24.9191	25.3523	26.7871	26.733							13	13	13	51.6	51.6	51.6	18.795	0	202.96	8085800000	105	63301000	828390000	179360000	262470000	1186300000	299840000	1455200000	1069600000	810600000	928010000	222070000	780760000	1155100000	0.597507	0.482757	1.74531	1.33552	0.542519	0.738541
PfIT_110014600	pre-mRNA-processing factor 6, putative	12.3991	13.7427	14.3257	15.1086	15.7046	14.8875	17.035	15.2566	14.6661	15.3439	13.4905	14.4606							2	2	2	1.7	1.7	1.7	152.17	0.0012469	2.1044	28804000	2	415910	1055500	0	2720500	10340000	3202400	4111900	0	886230	2333900	2001700	1736100	374080	1.31663	0.231621	1.74441	2.81165	1.1152	0.871
PfIT_120057300	rhoptry neck protein 3	15.7907	19.3993	14.5721	17.4205	17.8512	19.6742	19.6439	17.2164	17.9316	18.9383	17.2197	18.8342							12	12	12	5.6	5.6	5.6	263.19	0	15.283	580530000	35	7539100	91964000	3239600	23330000	108960000	66811000	31448000	20253000	20300000	111270000	33252000	62162000	4364900	0.465472	0.551628	1.72793	1.07626	0.445229	0.687588
PfIT_050034500	conserved Plasmodium protein, unknown function	17.7073	17.3165	15.6321	19.4532	18.527	17.8153	21.9535	15.574	17.4506	19.1486	17.65	19.2444							19	19	19	13.4	13.4	13.4	175.81	0	77.57	558840000	26	16050000	12242000	3808900	53833000	304590000	43587000	28331000	3658500	15426000	17298000	13434000	46580000	7451200	1.01281	0.357333	1.7132	2.15812	0.291942	0.724
PfIT_050020600	conserved Plasmodium protein, unknown function	12.0855	13.7792	12.0314	14.865	15.2033	12.9669	16.9604	11.7753	13.3633	15.3878	14.7621	15.1642							1	1	1	1.6	1.6	1.6	90.293	0.0012392	2.0807	11796000	1	0	0	0	1163800	4973200	1672100	1471300	0	1083700	0	0	1432000	302460	0.88481	0.385864	1.71302	1.8991	0.356054	0.71209
PfIT_140026100	conserved Plasmodium membrane protein, unknown function	14.6873	17.4127	15.2438	17.6135	17.5949	17.2688	20.1959	16.2364	15.0998	17	16.9712	17.0526							14	14	14	7.2	7.2	7.2	261.06	0	19.022	268040000	29	2822800	18669000	4151700	21457000	128520000	14024000	21183000	8260800	13748000	16897000	3757200	14545000	2505000	0.954785	0.35107	1.71115	2.03977	0.327306	0.706884
PfIT_080018900	40S ribosomal protein S16, putative	22.4084	25.2236	23.5035	24.8534	26.4535	24.9553	26.3697	24.9838	23.6665	24.3205	25.4785	24.7089							8	8	8	41.7	41.7	41.7	16.285	0	73.653	3078000000	77	38968000	274250000	83245000	212190000	606990000	146660000	643290000	232260000	327250000	227720000	93204000	191960000	439710000	0.816597	0.412903	1.70894	1.76376	0.499903	0.710861
PfIT_100018100	conserved Plasmodium protein, unknown function	12.6188	16.0169	11.9178	14.7169	15.6202	15.2877	18.3547	16.9284	13.4758	15.7482	16.3935	15.7476							3	3	3	1.9	1.9	1.9	173.33	0.0012225	2.0217	60459000	4	0	4774200	0	1938900	24136000	3962800	3626500	8980800	6198400	2879900	0	3961300	839700	0.583061	0.495527	1.69041	1.30734	0.641866	0.814497
PfIT_080019200	DNA/RNA-binding protein Alba 1	24.689	26.4773	25.6806	27.4142	27.9647	26.5258	27.3526	27.3176	25.4547	25.9419	26.9832	26.7094							15	15	15	48.4	48.4	48.4	27.258	0	210.41	16838000000	139	324560000	1121100000	645400000	2146100000	2056600000	773540000	3143200000	2007200000	1591900000	1159400000	551830000	1316800000	1403100000	1.19038	0.271931	1.68592	2.53226	0.60207	0.77548
PfIT_030027700	40S ribosomal protein S3A, putative	21.2874	23.8222	22.3532	23.8271	25.1753	23.5151	26.249	24.2016	22.2686	23.6577	24.0913	24.1707							22	22	22	69.5	69.5	69.5	30.047	0	87.787	3624000000	107	38391000	222490000	80367000	223240000	1196300000	198510000	568330000	289400000	268100000	179820000	75791000	283260000	241600000	0.877422	0.379653	1.68488	1.88437	0.571369	0.741256
PfIT_120018100	eukaryotic translation initiation factor 3 subunit A, putative	18.8631	20.1124	18.6667	20.7558	21.2131	20.7047	22.5786	19.9024	19.346	20.9785	20.1974	21.1439							15	15	15	12	12	12	166.06	0	42.051	1200200000	63	26702000	63476000	23303000	99151000	350760000	115700000	136130000	54881000	67331000	95706000	37319000	129760000	21432000	1.59953	0.157352	1.67716	3.48898	0.565548	0.740684
PfIT_050012900	nuclear protein localization protein 4, putative	13.3908	15.4085	13.9447	17.8345	13.1867	16.7247	22.0939	10.6103	13.021	17.9399	17.1704	17.4954							9	9	9	20.3	20.3	20.3	62.574	0	63.321	174760000	11	0	1391800	504570	7479400	143250000	8045900	0	0	4719900	3465500	0	5912700	5461400	0.474008	0.552796	1.6673	1.09319	0.100578	0.884684
PfIT_080017400	karyopherin alpha	19.4081	21.1656	19.3247	22.5692	21.2767	21.0317	24.1379	20.2934	20.5877	22.4915	21.016	21.4661							11	11	11	25	25	25	61.158	0	184	843260000	49	12523000	42341000	11819000	112020000	332290000	106140000	45728000	23132000	38168000	38587000	28365000	52146000	46848000	1.01609	0.359027	1.65973	2.16487	0.549999	0.738762
PfIT_040027200	eukaryotic initiation factor 4A-III, putative	13.3856	18.4643	16.923	18.0398	17.4866	18.2231	20.1001	18.5606	18.541	18.7747	18.101	19.4022							3	3	3	10.5	10.5	10.5	44.799	0	4.1035	100310000	12	0	7956800	2733700	5928400	24726000	9866500	4040400	8505600	6185400	6731800	8391100	15243000	4559500	0.473234	0.551003	1.65885	1.09165	0.818479	1
PfIT_110046700	60S ribosomal protein L28	22.6806	24.9979	24.5949	25.0992	26.7329	25.3733	26.8517	25.6056	24.7268	24.7547	26.2897	25.6953							7	7	7	46.5	46.5	46.5	14.38	0	298.84	4347800000	68	47059000	234540000	177380000	251590000	847780000	198150000	780730000	357410000	574230000	304230000	194360000	380310000	621110000	0.874378	0.378909	1.64398	1.8783	0.801629	0.97116
PfIT_080025500	C-13 antigen	14.8583	18.7334	16.5199	18.3808	18.2744	18.377	21.0851	15.9343	17.4834	18.4255	16.6929	18.7709							7	7	7	10.1	10.1	10.1	99.392	0	14.828	202300000	18	1217800	17869000	3852800	13994000	91210000	14435000	12999000	2567400	4343500	13957000	7512800	18340000	4934100	0.66169	0.469799	1.64014	1.46055	0.316243	0.703725
PfIT_030007800	N-ethylmaleimide-sensitive fusion protein	15.5723	18.1206	16.2421	17.8989	19.144	17.7796	22.0911	16.5711	18.087	19.4614	18.0042	17.3803							11	11	11	15.8	15.8	15.8	89.115	0	29.856	372950000	15	2436000	14250000	3875500	12220000	223390000	36094000	28966000	4868200	13145000	11250000	13922000	8530300	7459000	0.86223	0.39192	1.62918	1.85413	0.554595	0.7424
PfIT_130036100	conserved Plasmodium protein, unknown function	14.4195	19.994	18.0231	18.6718	20.6681	17.9423	20.4315	18.3932	16.4694	18.3848	18.8583	15.9293							4	4	4	5.5	5.5	5.5	69.022	0	4.0734	133880000	14	0	21929000	5593700	8769600	29696000	7187700	34990000	7229900	9980000	5289400	1905500	1310500	6375300	0.370677	0.625591	1.61523	0.88549	0.182005	0.823051
PfIT_090026400	conserved Plasmodium protein, unknown function	19.2489	16.9444	17.5844	19.8018	18.4733	20.3398	22.2977	13.6676	17.6901	17.4482	18.5696	19.3392							2	2	2	9.7	9.7	9.7	28.986	0	7.0535	111640000	11	6853200	1387300	2161800	10053000	56710000	1967100	4003200	0	4279500	14598000	2326100	7296000	10149000	0.848236	0.398164	1.61237	1.82634	0.00516929	0.992153
PfIT_110042500	conserved Plasmodium protein, unknown function	15.3684	18.5746	15.3543	17.7659	18.8801	17.4868	20.7225	16.6143	17.9786	19.3903	16.41	19.6792							23	23	23	8.7	8.7	8.7	336.23	0	105.64	678860000	37	5668200	52315000	5613300	29865000	231840000	92079000	64650000	13443000	11668000	24611000	34611000	112490000	5066100	0.6298	0.478419	1.6118	1.39845	0.549882	0.735683
PfIT_130039000	histone H3-like centromeric protein CSE4	16.7467	19.1909	17.7658	19.7457	20.3435	18.4011	22.7054	17.9214	18.9879	20.4647	18.4054	20.4454							4	4	4	27.1	27.1	27.1	19.627	0	5.6541	85898000	11	659850	3590700	1337100	5274600	41034000	8682500	7983100	1489400	2083200	2077000	3119500	8566800	14316000	0.809116	0.416239	1.59563	1.749	0.538835	0.730795
PfIT_060018500	60S ribosomal protein L19	21.7232	24.5703	23.4815	22.8092	26.3286	25.4112	25.2427	24.9222	22.7719	23.5413	24.707	24.1736							6	6	6	33	33	33	21.58	0	17.493	1881000000	36	20772000	149470000	70269000	44095000	238220000	73248000	505650000	190760000	164320000	267720000	42970000	113540000	313510000	0.521292	0.534419	1.59135	1.18645	0.391568	0.704576
PfIT_070013900	chloroquine resistance transporter	11.6026	20.0006	17.9796	17.6109	19.2657	17.4752	19.8325	17.419	13.3941	17.5296	11.888	15.1132							2	2	2	5.4	5.4	5.4	48.592	0.0012151	1.9923	65129000	5	0	18882000	4652500	3603000	16806000	3405900	11346000	3154400	0	3279600	0	0	3618300	0.241611	0.750623	1.58964	0.612511	0.0381457	0.949405
PfIT_060022100	60S ribosomal protein L27a, putative	22.9188	26.5941	25.3631	24.9703	27.6575	27.0119	27.3561	26.8588	24.9909	24.7937	26.5504	26.3751							13	13	13	52.7	52.7	52.7	16.722	0	84.849	9661700000	114	71366000	911690000	388420000	295840000	1546100000	261760000	1905400000	1095300000	884510000	1217900000	300090000	783300000	1073500000	0.516108	0.534367	1.58792	1.17626	0.483446	0.712646
PfIT_130023100	40S ribosomal protein S19	22.0423	23.5998	22.6213	23.4427	24.509	25.0755	25.5631	24.2627	22.9366	22.6803	24.497	23.9935							5	5	5	39.3	39.3	39.3	16.763	0	97.105	1532600000	45	30234000	88993000	45165000	79807000	347010000	47049000	167130000	140890000	165740000	247500000	56197000	116910000	218950000	1.13133	0.296875	1.5879	2.40563	0.782408	0.946879
PfIT_100035200	conserved Plasmodium protein, unknown function	14.138	20.1351	19.7108	19.4386	19.2903	20.0128	19.7949	20.3168	19.8154	19.7006	19.5547	20.8958							3	3	3	4	4	4	104.46	0	3.6969	523990000	3	847320	54119000	40332000	33396000	42751000	40048000	30133000	61388000	36196000	49720000	43364000	91696000	11149000	0.336708	0.643476	1.58591	0.815487	0.437887	0.691845
PfIT_140036200	coatamer beta subunit, putative	12.5346	14.3825	14.44	17.5468	15.2889	13.2779	18.6285	13.2339	12.5643	14.6966	14.0445	14.8029							3	3	3	2.9	2.9	2.9	164.48	0	5.896	49177000	5	0	1452300	0	13020000	27557000	1805600	2722300	0	0	675400	0	1943700	723190	0.501069	0.541375	1.58551	1.14666	0.194525	0.806814
PfIT_120053900	conserved Plasmodium protein, unknown function	17.7274	20.1169	16.5335	19.6938	19.9815	19.3766	22.5421	17.2983	18.2866	19.5765	19.0229	19.2063							18	18	18	10.8	10.8	10.8	230.44	0	92.191	813820000	39	14105000	73910000	6165900	55122000	396960000	50818000	67291000	10476000	34623000	44243000	20784000	39317000	12520000	0.660892	0.466829	1.55798	1.459	0.258691	0.751325
PfIT_130064200	40S ribosomal protein S15	23.2641	25.3151	24.2436	25.322	26.2522	25.9014	28.8957	25.8143	24.8553	27.0933	26.7566	26.5955							12	12	12	60.3	60.3	60.3	17.25	0	128.17	9623900000	67	80591000	333970000	158900000	335560000	3995500000	1145400000	639420000	472040000	907060000	501410000	242810000	811180000	1203000000	1.11964	0.300758	1.55091	2.38083	0.763086	0.882958
PfIT_110035000	26S protease regulatory subunit 6A, putative	16.4766	17.7991	12.4914	16.6804	18.3067	16.4251	20.0039	15.4648	18.085	17.9939	16.7695	18.6218							4	4	4	12.5	12.5	12.5	49.54	0	4.3687	86634000	7	2644600	6614100	0	3045800	30492000	7570200	9403000	1311500	3239800	2551700	8063300	11698000	2987400	0.382935	0.619598	1.54835	0.910504	0.474452	0.701854
PfIT_110029400	60S ribosomal protein L35, putative	23.0591	24.1102	22.9446	24.5637	25.7467	24.4166	26.6921	24.7475	22.7798	24.3187	25.5824	24.896							2	2	2	15.3	15.3	15.3	14.748	0	22.394	1153800000	20	26218000	54328000	24218000	74391000	325270000	62771000	168910000	84499000	150720000	67183000	21603000	93663000	384590000	1.28502	0.233765	1.53767	2.74052	0.50336	0.713957
PfIT_110019600;PfIT_110020000	cysteine proteinase falcipain 2a	13.774	18.9675	15.5889	17.4933	17.8479	17.6005	22.1125	17.3387	16.2638	19.4215	18.2089	18.9749							7	7	7	15.4	15.4	15.4	55.803	0	31.295	172050000	8	0	11790000	1133600	4243700	104290000	16150000	5425900	3812400	6968500	4570800	1809700	11851000	7480300	0.431088	0.593303	1.53708	1.00771	0.449861	0.693523
PfIT_110040800	tudor staphylococcal nuclease	16.4855	19.0129	17.8083	20.4097	17.8187	19.6686	23.1306	17.5643	19.7123	20.5438	18.73	20.9188							30	30	30	24.5	24.5	24.5	127.8	0	112.35	1136900000	60	5964200	34383000	14919000	90540000	596940000	99360000	15027000	12598000	28261000	54168000	55837000	128850000	17490000	0.652044	0.473145	1.53008	1.44177	0.595483	0.766127
PfIT_130071100;PfIT_120017200	ubiquitin-60S ribosomal protein L40	22.3161	22.4437	22.4767	23.9988	24.2597	23.5475	25.5127	24.1476	24.0088	23.77	24.563	23.6906							3	3	3	26.6	26.6	26.6	14.617	0	104.17	1009200000	26	26109000	28524000	29183000	83814000	239360000	71525000	100430000	92922000	123930000	61302000	84398000	67694000	201840000	2.68831	0.0592	1.52312	7.12648	1.94741	0.472286
PfIT_030012900	conserved Plasmodium protein, unknown function	12.8582	16.1041	12.6006	14.0476	16.0409	16.0382	18.0049	15.6315	15.1077	15.4725	15.3515	15.8436							6	6	6	4.2	4.2	4.2	198.49	0	7.2864	70292000	9	0	6902900	0	1659600	25777000	4455600	6607300	4974900	4097100	6594900	3460100	5762700	717260	0.509245	0.535389	1.52129	1.16276	0.7667	0.921876
PfIT_060011000	translation initiation factor IF-2, putative	16.527	18.3185	17.4543	18.9847	18.2853	19.5207	22.5052	17.6804	18.4559	19.4911	18.7387	20.0577							10	10	10	12.8	12.8	12.8	112.36	0	57.495	527030000	28	4532600	15691000	8620000	24901000	285750000	35372000	15334000	10083000	20996000	36105000	17259000	52386000	10980000	1.11944	0.298496	1.49701	2.38041	0.597541	0.776436
PfIT_110034600	60S ribosomal protein L38	20.8913	23.0947	21.9869	23.4185	23.8595	23.1719	26.0917	23.0439	22.689	23.8359	23.5643	23.5092							4	4	4	36.8	36.8	36.8	10.314	0	8.7785	531540000	19	5835100	26873000	12470000	33636000	214540000	44919000	45661000	25943000	37213000	28350000	20286000	35818000	177180000	1.051	0.330194	1.49229	2.23697	0.710786	0.915818
PfIT_140033700	conserved Plasmodium protein, unknown function	14.8438	12.0863	14.104	15.9142	15.3126	14.2501	17.2254	14.7228	16.0067	16.0316	14.8866	11.8629							2	2	2	1.4	1.4	1.4	175.42	0.0035885	1.8726	42525000	2	2440600	0	1461500	5125600	12719000	5559900	3377900	2244300	2514100	1617200	5464900	0	512350	0.706361	0.463587	1.48095	1.54762	0.986881	0.944776
PfIT_140013700	rRNA 2-O-methyltransferase fibrillarin, putative	20.0336	21.623	21.0709	22.3571	22.4783	22.3074	24.2756	21.8726	20.7458	21.9284	22.2057	22.5741							12	12	12	38.2	38.2	38.2	34.627	0	16.766	1405600000	57	23612000	71054000	48461000	118190000	446810000	87806000	128550000	84477000	106420000	114190000	38685000	137380000	63892000	1.45807	0.20479	1.47178	3.14059	0.537294	0.72446
PfIT_140055900	transcription factor with AP2 domain(s), putative	14.1617	17.428	15.3764	16.7746	17.6308	16.9677	19.2914	11.3333	16.0098	16.7575	15.2607	18.4186							4	4	4	7.2	7.2	7.2	84.989	0	6.06	64209000	7	623130	5995600	1446200	3811800	21816000	3766800	6900400	0	1334700	4357600	2243500	11914000	1888500	0.675328	0.471643	1.46898	1.48712	0.014647	0.979262
PfIT_070028000	conserved Plasmodium protein, unknown function	17.2952	16.8432	12.1886	19.3077	17.1937	14.2296	21.9499	15.1543	16.039	19.2674	15.3275	18.7378							21	21	21	11.7	11.7	11.7	266.08	0	49.015	681100000	43	17209000	12580000	499480	69438000	433480000	67521000	16040000	3901800	4399700	2055600	7204800	46775000	6365400	0.266953	0.722863	1.46807	0.667807	0.351427	0.713027
PfIT_050025200	40S ribosomal protein S9, putative	21.9717	23.6716	22.2101	23.8846	26.0868	22.2579	25.2351	24.3022	21.098	23.3758	23.8509	24.7646							9	9	9	36	36	36	22.123	0	77.153	1848300000	47	32902000	106900000	38816000	123900000	315950000	87081000	570160000	165490000	121040000	40123000	17956000	228020000	231040000	0.520934	0.531871	1.45863	1.18575	0.273236	0.738365
PfIT_080018400	conserved Plasmodium protein, unknown function	19.2646	21.2039	20.8648	21.5758	21.7731	22.3535	23.9266	21.0181	20.5484	21.2716	22.3126	22.2304							13	13	13	22.5	22.5	22.5	76.742	0	29.678	1133600000	58	14486000	55556000	43920000	71892000	366730000	58228000	82432000	48843000	119810000	123250000	35271000	113170000	49287000	1.06631	0.329286	1.45639	2.26882	0.498794	0.708297
PfIT_050022100	60S ribosomal protein L2	22.6672	25.7618	24.6337	24.3228	26.8688	26.2344	26.6468	26.0906	23.7537	24.4094	25.9086	26.3932							11	11	11	46.9	46.9	46.9	27.999	0	184.14	7437600000	99	73268000	625840000	286330000	230830000	1155700000	245110000	1348100000	786060000	692860000	868410000	155590000	969490000	676140000	0.542415	0.526985	1.45442	1.22788	0.379048	0.700188
PfIT_140030200	conserved Plasmodium protein, unknown function	17.0598	19.7973	18.6151	19.664	20.3397	19.8285	22.0704	19.7983	18.026	19.7285	19.1573	20.7579							18	18	18	13.8	13.8	13.8	183.05	0	62.898	800830000	52	8197200	54668000	24091000	49844000	264240000	52123000	79618000	54705000	35082000	55861000	16015000	106390000	13347000	0.822722	0.414318	1.45333	1.77585	0.448646	0.689362
PfIT_050020200	pre-mRNA-splicing factor CWC2, putative	15.5423	17.6048	17.2738	18.6516	18.8217	17.3002	21.3153	19.2554	11.9462	18.9512	19.1038	18.7433							3	3	3	4	4	4	98.698	0	35.407	179520000	12	1383900	5780500	4595700	11942000	75673000	14698000	13437000	18149000	16339000	4680200	114430	12726000	6190300	0.841314	0.40467	1.45084	1.81262	0.0849748	0.89954
PfIT_130014200	60S ribosomal protein L24, putative	23.1371	26.1209	25.202	25.6055	26.7015	26.4828	26.9507	26.1186	24.9028	24.5352	26.7793	26.4872							7	7	7	34	34	34	19.245	0	233.25	5053600000	49	55348000	437860000	231590000	306320000	778250000	145880000	654800000	437170000	691090000	562680000	188210000	564420000	842270000	0.696976	0.465027	1.44324	1.52932	0.477608	0.709199
PfIT_090010100	high molecular weight rhoptry protein 3	16.4424	20.5276	16.3342	19.0918	19.3064	19.2299	21.2125	17.6219	18.4006	19.7032	17.9856	18.1672							10	10	10	12.5	12.5	12.5	104.82	0	12.133	362960000	25	4096400	69534000	3800600	25703000	111780000	39264000	29824000	9278200	11939000	28283000	15919000	13540000	7890400	0.448865	0.573885	1.44128	1.04323	0.303013	0.705901
PfIT_030012500	conserved Plasmodium protein, unknown function	16.5401	18.0342	14.8608	18.6919	18.131	16.9239	20.9309	16.2477	17.6561	18.3955	15.861	18.7361							14	14	14	10.6	10.6	10.6	213.42	0	23.516	339520000	25	7433200	20938000	2320800	33030000	155930000	26897000	22392000	6069400	4642200	9698300	16111000	34058000	4352800	0.611485	0.480691	1.43722	1.36277	0.468608	0.700235
PfIT_050008700	serine/arginine-rich splicing factor 12	18.4658	22.0775	20.073	21.2795	22.483	21.1604	23.5948	21.6428	19.2466	20.0956	21.5741	21.1892							6	6	6	18.5	18.5	18.5	37.699	0	8.1122	557790000	23	5068600	61962000	15442000	35637000	177370000	15686000	82072000	45841000	43710000	32814000	8708200	33476000	39842000	0.565934	0.512101	1.43555	1.2739	0.323831	0.702439
PfIT_030025600	ATP-dependent RNA helicase DDX6	17.5868	20.8571	19.5999	19.333	21.8765	21.1204	22.5073	21.0881	19.2757	21.0654	20.6544	20.8477							15	15	15	36	36	36	49.413	0	21.851	581720000	58	4724700	45585000	19071000	15850000	143080000	52664000	92406000	53500000	39609000	54712000	15233000	45289000	24238000	0.516009	0.532814	1.4287	1.17607	0.530999	0.710146
PfIT_120035700	protein transport protein SEC13	16.2593	19.0259	14.2544	18.6624	16.0121	19.1442	21.4627	16.6334	18.6438	19.9343	17.2749	19.9938							5	5	5	8.9	8.9	8.9	90.566	0	13.455	153260000	16	1647200	11210000	410420	8712600	60691000	21039000	1387800	2134800	3330300	12168000	8601200	21927000	7298000	0.350088	0.644508	1.42634	0.843188	0.537995	0.729024
PfIT_060015700	60S ribosomal protein L39	20.7722	24.209	21.8112	22.5507	24.4733	24.0356	24.5404	24.8702	22.0854	21.5385	23.4478	25.2263							2	2	2	21.6	21.6	21.6	6.5187	0.0013333	2.5459	184750000	10	1790800	19393000	3679900	6143800	24400000	3046000	23292000	30667000	11442000	17196000	4450200	39252000	184750000	0.535027	0.529564	1.42239	1.21341	0.511016	0.706855
PfIT_130067100	conserved Plasmodium protein, unknown function	12.6303	15.4599	12.4816	16.0127	13.2309	15.5501	19.8025	13.0887	16.1792	17.7735	17.7275	15.4808							15	15	15	7.9	7.9	7.9	290.97	0	81.819	212100000	18	0	5814000	0	8529000	117960000	28902000	1240200	0	27996000	6189100	9571900	5899000	1644200	0.470356	0.548472	1.40731	1.08595	0.58252	0.759439
PfIT_100010900	RNA-binding protein, putative	23.1629	25.4602	24.6931	24.7713	26.578	26.1807	26.7225	24.7145	23.9904	24.2659	25.0029	25.2449							11	11	11	50.4	50.4	50.4	29.53	0	323.31	5896400000	56	103310000	507770000	298380000	314980000	1218000000	221910000	1101900000	302830000	369840000	836710000	183330000	437390000	536040000	0.740843	0.453765	1.4046	1.61498	0.265119	0.747525
PfIT_120022200	DNA-binding chaperone, putative	12.3182	14.0746	14.7715	14.9732	14.8924	15.4735	19.4667	11.618	14.3965	15.1778	13.9517	16.5645							6	6	6	7.5	7.5	7.5	111.85	0	5.3384	50607000	6	245130	828210	1342500	1543900	34777000	1779100	1459800	0	760550	2184000	1035200	4652000	1054300	0.860158	0.391069	1.39155	1.85001	0.234528	0.775775
PfIT_060014900	transcription elongation factor SPT5, putative	15.3929	16.8754	16.7562	17.9695	18.6489	16.5777	19.8675	16.9101	15.4389	17.758	17.3706	17.2585							7	7	7	6	6	6	149.18	0	19.572	189800000	18	3011800	8416100	7748300	17966000	66959000	15516000	28773000	8620500	11862000	6846900	3109300	10975000	2711500	0.834235	0.401446	1.39056	1.79861	0.313725	0.705245
PfIT_050037100	lysine-rich membrane-associated PHISTb protein	22.8025	25.2711	22.9518	24.6193	26.313	24.2597	25.9021	25.2455	22.5208	24.3828	24.85	24.1854							19	19	19	42.2	42.2	42.2	60.99	0	323.31	8391400000	152	168250000	931290000	186600000	592760000	1442200000	503140000	1917500000	914930000	695570000	461970000	138400000	438800000	364840000	0.611233	0.479921	1.38887	1.36228	0.269662	0.74459
PfIT_140084700	EMP1-trafficking protein	13.6825	12.8089	12.4231	16.4113	13.6116	13.0276	20.4524	11.5771	12.516	14.9905	12.935	17.8375							5	5	4	11.7	11.7	3.9	130.72	0	7.7256	85049000	5	0	0	0	4096200	67434000	1530000	588320	0	0	392470	0	11008000	1809600	0.550378	0.5216	1.37867	1.24348	0.263818	0.74634
PfIT_140054300	multidrug resistance protein 2	14.4657	17.2628	14.513	15.7082	16.9075	17.7511	20.028	15.0068	12.8218	18.162	16.0853	13.8001							7	7	7	9.8	9.8	9.8	114.62	0	49.683	106510000	7	0	8334700	1239100	2837400	56660000	15544000	6515600	0	3685000	11692000	0	0	2009600	0.554776	0.516235	1.37508	1.25208	0.081838	0.900403
PfIT_100031800	60S ribosomal protein L3	22.6731	25.8785	23.9037	23.9653	26.7376	25.8713	26.1054	26.1573	23.7304	23.9935	25.3485	25.3082							23	23	23	54.4	54.4	54.4	44.22	0	303.34	9641900000	175	120380000	1110400000	282490000	294830000	1299500000	300630000	2014200000	1347100000	769010000	1104900000	250530000	747810000	535660000	0.480288	0.552915	1.37298	1.10562	0.406832	0.695664
PfIT_130007900	40S ribosomal protein S7, putative	22.46	22.4768	22.8278	23.98	23.9048	23.9906	26.5233	23.7853	22.5954	25.4211	23.8236	24.3047	+	pos1_control					15	15	15	59.8	59.8	59.8	22.48	0	323.31	2657100000	52	57696000	58372000	74450000	165460000	964510000	449290000	157060000	144570000	148460000	166680000	63371000	207220000	265710000	3.43374	0	1.37021	11.1491	0.664162	0.851722
PfIT_050012300	60S ribosomal protein L4	23.0801	25.8638	24.8354	24.5893	27.0621	26.2252	26.1798	26.2944	24.1569	24.0913	25.8659	25.6762							25	25	25	55.2	55.2	55.2	46.211	0	278.49	13067000000	171	177350000	1221200000	598720000	504830000	1520300000	357450000	2802500000	1646000000	1223100000	1568900000	374100000	1072400000	653340000	0.555349	0.517833	1.36577	1.2532	0.372607	0.702742
PfIT_100008200	60S ribosomal protein L13, putative	23.2947	25.8697	24.7535	24.968	26.8064	26.2238	27.5712	26.1884	24.9294	25.3411	26.3048	26.057							16	16	16	58.9	58.9	58.9	23.754	0	184.51	9146400000	119	113190000	674440000	311130000	361000000	2193500000	467550000	1291000000	841190000	911870000	862090000	351480000	767930000	831490000	0.66921	0.469285	1.36008	1.4752	0.677307	0.89317
PfIT_080036100	Plasmodium exported protein, unknown function	18.497	22.3056	21.1176	21.4817	22.7547	21.7237	18.7084	16.0785	14.6661	14.3775	12.5522	14.5052							5	5	5	14.6	14.6	14.6	37.966	0	8.2244	283950000	16	4809700	67389000	29579000	38069000	5568200	276690	92001000	899630	0	45022000	337960	0	21842000	0.493036	0.539598	1.34661	1.13082	1.19577	0.884372
PfIT_110021100	heat shock protein 101	12.9129	14.9708	10.966	12.8004	16.9455	13.1399	16.3986	13.4347	11.1062	15.5157	21.5179	15.8677							3	3	3	3.9	3.9	3.9	102.79	0.0014006	2.8065	174420000	4	0	1669800	0	0	4492400	2436100	6563100	0	156150000	0	0	3109200	3354300	0.311985	0.671617	1.34535	0.763814	0.133729	0.860433
PfIT_070008400	erythrocyte membrane-associated antigen	18.4321	20.2745	19.4773	20.1378	20.7587	21.2975	22.7725	19.5145	20.0751	20.3764	19.8875	21.5972							39	39	39	20.8	20.8	20.8	264.22	0	158.99	2484100000	185	39260000	140780000	81018000	128060000	795310000	151090000	196940000	83132000	107660000	286090000	122610000	352160000	22379000	0.995191	0.356981	1.33672	2.12201	0.540131	0.733911
PfIT_060028400	SNF2 helicase, putative	15.8055	16.9521	16.5081	17.9051	18.1076	17.2368	19.9027	17.4392	15.7933	17.7516	17.0187	17.8036							15	15	15	6.3	6.3	6.3	317.38	0	25.484	355590000	28	7388100	16355000	12023000	31663000	126440000	28468000	36436000	22927000	17128000	19924000	7325900	29513000	2756500	1.45133	0.205122	1.32792	3.12449	0.447418	0.685739
PfIT_120036800	asparagine-rich protein, putative	11.6772	18.152	14.5865	16.046	15.7385	16.5918	18.6592	14.076	12.8202	15.9526	15.6485	13.9641							6	6	6	3.1	3.1	3.1	211.94	0	6.8911	79930000	8	0	21846000	1845200	5074500	31048000	4756300	4100300	0	3852300	7407600	0	0	1065700	0.281401	0.70755	1.32013	0.698903	0.0505818	0.938395
PfIT_140061700	conserved Plasmodium protein, unknown function	22.4408	26.8204	23.4711	24.2765	26.1264	26.2223	27.6431	24.8394	25.0504	25.6826	25.4895	25.9217							25	25	25	60.5	60.5	60.5	69.282	0	323.31	17918000000	203	136640000	2844200000	279080000	487720000	5030600000	1292500000	1758000000	720490000	1130600000	1879000000	833940000	1525500000	746590000	0.370548	0.624423	1.29762	0.885227	0.427265	0.693731
PfIT_080030000	conserved Plasmodium protein, unknown function	14.0936	13.6088	11.5005	16.0675	13.6385	13.3655	17.2733	10.8589	13.3925	15.2653	12.4338	14.759							2	2	2	1.3	1.3	1.3	197.05	0.0095949	1.4682	26369000	2	0	0	0	6249300	14415000	3584000	1160500	0	0	960380	0	0	289770	0.478118	0.553736	1.28956	1.10133	0.14138	0.858464
PfIT_050012700	subtilisin-like protease 1	15.6936	20.4839	16.6929	18.184	19.5034	19.0076	22.7509	18.5392	19.3206	20.6456	19.3021	20.4584							8	8	8	13.4	13.4	13.4	77.7	0	17.25	495500000	41	1748900	48394000	3496100	9827700	232920000	54132000	24527000	12571000	21332000	17393000	21607000	47547000	15015000	0.350916	0.644565	1.27488	0.844897	0.591209	0.761231
PfIT_110049100	ras-related protein Rab-6	18.7417	20.6985	18.1693	20.3914	20.9561	20.0834	21.272	19.9428	20.2393	19.8946	20.4711	21.0453							1	1	1	5.3	5.3	5.3	23.609	0.0079909	1.6491	228560000	9	6136900	23824000	4127000	19256000	35451000	13646000	28480000	14109000	20349000	15553000	17329000	30297000	16326000	0.721912	0.463787	1.27378	1.57798	0.672254	0.888483
PfIT_120043800	protein kinase 2	14.0552	14.7791	11.9512	13.606	16.1052	14.8915	18.9212	13.8897	14.5026	17.6872	15.7887	15.8945							2	2	2	5.5	5.5	5.5	59.005	0	3.294	26850000	2	0	0	0	0	14396000	6120100	2044400	0	1641700	881430	0	1766600	925860	0.499059	0.540249	1.27243	1.1427	0.533567	0.715907
PfIT_110013300	heat shock protein DnaJ homologue Pfj2	18.2286	18.9499	18.2075	21.807	18.5889	18.8008	21.182	17.642	18.9084	19.575	20.3907	20.8454							9	9	9	23	23	23	62.376	0	30.045	382550000	24	9214600	15191000	9080900	110070000	71374000	23431000	11829000	6135900	41241000	13700000	14761000	56522000	12752000	0.523087	0.533964	1.27022	1.18998	0.298379	0.712973
PfIT_080027900	conserved Plasmodium protein, unknown function	15.1159	17.7429	13.0245	15.2292	17.2368	17.2248	20.343	16.0969	16.8253	19.0122	14.1282	18.2138							7	7	7	6.1	6.1	6.1	131.34	0	10.489	157290000	14	1881900	11626000	0	2035700	70488000	28023000	8186000	3714600	949080	8117800	6154400	16113000	2967700	0.346276	0.643626	1.26915	0.835313	0.579366	0.748899
PfIT_110014300	60S ribosomal protein L36	22.5925	22.9746	22.8821	24.5957	24.3711	23.2674	27.4296	23.4003	23.4625	24.9925	24.1837	24.8373							4	4	4	35.7	35.7	35.7	12.787	0	10.016	1095800000	16	18973000	24726000	23191000	76062000	542310000	100140000	65098000	33212000	57169000	30291000	34678000	89927000	365260000	1.38121	0.228651	1.26172	2.95961	0.659318	0.846634
PfIT_130047300	40S ribosomal protein S6	25.0545	25.7155	25.6251	25.9359	26.9793	27.2612	27.8753	26.9054	26.157	25.2584	26.5708	27.5122							20	20	20	40.2	40.2	40.2	35.384	0	323.31	12770000000	161	348460000	550980000	517520000	641940000	2462000000	401350000	1323100000	1257000000	996820000	1608600000	748240000	1914300000	1277000000	1.30347	0.232122	1.26047	2.78193	1.31623	0.861875
PfIT_110023600	splicing factor U2AF small subunit, putative	13.0851	15.9318	16.5504	17.8548	15.6812	15.7894	20.3284	12.63	14.8517	18.6878	16.4885	19.0092							3	3	3	11.2	11.2	11.2	35.325	0	3.0941	46284000	3	0	1000200	1535600	3792600	21066000	6756200	840650	0	1471100	906170	473080	8442500	2892800	0.41658	0.596479	1.25269	0.978582	0.106888	0.88079
PfIT_100008600	RNA-binding protein, putative	18.3564	19.4358	18.5198	20.2272	21.3114	18.5211	20.95	19.7606	16.74	19.2081	19.5591	18.5497							9	9	9	11.5	11.5	11.5	106.25	0	14.616	458120000	44	14766000	31203000	16538000	54004000	89132000	26649000	114500000	39083000	33989000	16552000	4816400	16884000	10412000	0.641589	0.482056	1.2492	1.42141	0.105466	0.880569
PfIT_140052100	conserved Plasmodium protein, unknown function	20.6432	22.7635	22.0673	21.9337	24.1052	23.1786	24.3281	22.9203	20.7922	21.5894	23.2582	23.0132							20	20	20	39.6	39.6	39.6	41.934	0	121.58	2137700000	120	36029000	156650000	96678000	88131000	463360000	69422000	397010000	174630000	220720000	208870000	39948000	186250000	97168000	0.634845	0.476028	1.24782	1.40827	0.287311	0.732257
PfIT_070029600	conserved Plasmodium protein, unknown function	18.1972	18.1828	18.0956	19.2072	19.517	19.4801	23.3399	15.1422	18.6524	20.2038	12.1549	15.2103	+	pos1_control					2	2	2	22	22	22	13	0	5.0715	91209000	3	1803200	1785400	1680600	3631600	63700000	7246100	4501600	0	0	4387800	2472100	0	15201000	3.57234	0	1.24292	12.0988	0.137909	0.85955
PfIT_070028800	protein kinase, putative	15.1747	17.3855	14.1108	16.631	17.6298	16.0958	19.003	16.0622	13.602	17.0597	16.2332	16.2725							7	7	7	3.7	3.7	3.7	242.87	0	8.8622	148160000	11	3698600	17122000	0	10149000	52539000	13661000	20281000	6842100	7703600	7003500	1243400	7916000	1481600	0.505074	0.541043	1.22851	1.15455	0.133564	0.859282
PfIT_140044400	eukaryotic translation initiation factor eIF2A, putative	16.1988	17.9804	17.4592	18.968	17.8617	18.4746	21.2126	16.7153	17.7463	18.3332	17.7396	19.1217							7	7	7	12.3	12.3	12.3	76.832	0	45.497	203740000	18	2783200	9568500	6667500	18973000	89915000	12220000	8812800	3981300	8097500	13478000	8135300	21106000	5506400	0.923616	0.360398	1.22192	1.97686	0.388472	0.700785
PfIT_120034500	T-complex protein 1 subunit gamma	12.8733	16.0307	15.6519	16.6301	15.5775	16.0079	19.9642	14.5188	18.5573	18.278	15.3122	18.0333							4	4	4	7.9	7.9	7.9	60.662	0	5.119	85326000	7	0	2410100	1853500	3651500	36826000	11443000	1760400	0	1464700	2372200	13887000	9657800	2370200	0.51374	0.53311	1.21989	1.17161	0.671411	0.877536
PfIT_050031000	inner membrane complex protein 1g, putative	21.0154	23.6993	20.1598	22.6855	23.2346	22.5642	25.2158	21.8933	21.9049	23.9299	22.6598	22.2435							6	6	6	14.7	14.7	14.7	34.328	0	6.8399	1597300000	32	29674000	190700000	16399000	94435000	545560000	223740000	138180000	54534000	92771000	86823000	54973000	69517000	114090000	0.48147	0.553193	1.20326	1.10796	0.376973	0.698301
PfIT_060021800	conserved Plasmodium membrane protein, unknown function	19.1119	21.4095	17.8783	21.2025	20.185	20.6164	24.5403	19.9233	18.8782	21.9748	20.5945	20.3738							18	18	18	28.4	28.4	28.4	92.526	0	323.31	1795000000	64	24363000	119780000	10360000	103770000	1049100000	177240000	51254000	42755000	68082000	69121000	20719000	58425000	41744000	0.485864	0.549019	1.20139	1.11665	0.33595	0.70961
PfIT_060017300	rhoptry protein ROP14	16.2369	16.5932	13.4338	15.5139	17.4255	16.9139	19.6707	14.9949	16.3445	17.8609	15.3197	17.8223							7	7	7	5.4	5.4	5.4	171.98	0	8.1843	111080000	5	4325000	5536500	0	2620200	46737000	13331000	9857500	1828500	2290300	6914800	4659800	12979000	1983600	0.447043	0.573958	1.19645	1.03959	0.389806	0.704618
PfIT_130021900	choline-phosphate cytidylyltransferase	12.853	18.1894	15.5012	17.0058	16.7253	16.395	19.3471	12.4268	16.2893	17.7206	14.0221	18.0992							2	2	2	5.6	5.6	5.6	105.11	0	3.0513	78524000	6	0	12256000	1901600	5395700	27343000	8855500	4442400	0	0	3533300	3283500	11513000	1915200	0.314989	0.671079	1.19415	0.770129	0.0701308	0.913831
PfIT_110012400	transcription factor with AP2 domain(s)	15.6339	16.273	16.3422	17.1247	17.6115	17.0882	19.5239	15.356	16.7418	17.2138	17.7046	17.393							3	3	3	2.1	2.1	2.1	206.76	0	4.9937	158270000	7	3762700	5859900	6147800	10576000	55786000	11249000	14819000	3103500	15807000	10311000	8109800	12736000	2138700	1.87489	0.119037	1.19182	4.23296	0.378871	0.699467
PfIT_090033800	RNA-binding protein, putative	18.7417	21.0868	20.6599	21.3146	21.1292	21.6068	23.7567	20.849	20.7574	21.1314	21.412	22.4807							9	9	9	39.4	39.4	39.4	33.583	0	40.427	494310000	32	5260000	26727000	19880000	31299000	170080000	27566000	27524000	22665000	33484000	38324000	21270000	70232000	41193000	0.741757	0.453654	1.18741	1.61677	0.595259	0.762408
PfIT_020006600	knob associated heat shock protein 40	18.4848	22.0419	20.5827	21.1752	21.821	21.6596	23.4929	21.1208	19.9491	21.2096	21.9041	20.9498							11	11	11	29	29	29	48.281	0	78.543	1016900000	51	9537600	112270000	40830000	61566000	306920000	63051000	96326000	59287000	102040000	86131000	26317000	52663000	39113000	0.490266	0.544334	1.18212	1.12535	0.321904	0.705259
PfIT_130061500	conserved Plasmodium protein, unknown function	11.363	14.4258	13.2368	14.0632	14.4249	14.0715	18.5754	12.8292	15.3831	16.6229	15.0087	17.5994							4	4	4	4.9	4.9	4.9	113.53	0	6.5972	40286000	4	0	1078500	0	838790	19140000	4945300	0	0	1615300	843650	2093900	9730400	822160	0.584302	0.496808	1.17803	1.30976	0.616102	0.784253
PfIT_050011100	small ubiquitin-related modifier	18.5913	18.8449	18.0827	22.6234	16.5582	19.8697	23.5234	17.4588	21.8106	21.9391	18.2648	20.3796							3	3	3	21	21	21	11.06	0	5.0535	181650000	8	2369700	2825100	1665700	38769000	72344000	24125000	578990	1080900	1889800	5748300	22069000	8185200	30275000	0.266185	0.723008	1.17749	0.666146	0.596207	0.769431
PfIT_140053400	40S ribosomal protein S5	22.1904	25.1855	23.2355	24.1017	25.8008	24.2294	25.8204	24.4553	23.8236	23.9731	24.4798	24.4946							13	13	13	47.1	47.1	47.1	29.957	0	124.31	4643300000	95	71792000	572380000	148140000	270040000	888830000	247000000	876850000	345040000	350960000	295030000	222690000	354570000	309560000	0.4952	0.540157	1.17348	1.13509	0.477337	0.707557
PfIT_090034900	merozoite surface protein 1	13.6399	16.647	12.7047	15.4456	17.3277	13.7015	18.1809	16.0943	15.1406	16.538	15.3307	16.4754							4	4	4	2.9	2.9	2.9	187.62	0	4.582	68817000	4	0	7388400	0	3213100	21397000	6851000	11844000	5037400	2967100	959210	2600900	6560200	955800	0.2973	0.689202	1.16112	0.732793	0.649673	0.824595
PfIT_100012400	26S protease regulatory subunit 4, putative	15.6172	16.3891	9.93968	15.9788	16.1815	13.2469	20.3484	15.2818	18.5663	19.2361	18.4794	16.6673							3	3	3	7.6	7.6	7.6	49.824	0.0013514	2.6297	78126000	4	1256600	2145600	0	1614500	33375000	15438000	1858000	995930	9137100	0	9704000	2602100	3125100	0.197855	0.80299	1.15371	0.514411	0.744533	0.89552
PfIT_130037000	glutamine--tRNA ligase, putative	14.0192	14.869	13.9537	16.8692	13.6034	15.8095	18.203	12.5863	15.9273	16.8113	14.1994	16.7066							3	3	3	4	4	4	107.25	0.0012516	2.1319	37534000	2	0	0	0	5746200	14484000	5520100	0	0	903020	2756600	2991100	5133400	781970	0.497608	0.537865	1.14676	1.13984	0.31932	0.70513
PfIT_090008100	DEAD/DEAH box helicase, putative	11.8753	16.6891	13.5835	17.6949	12.6875	15.1703	19.1108	14.0297	16.4352	17.6754	12.2895	15.3082							9	9	9	3.5	3.5	3.5	300.94	0	11.262	160570000	11	0	13419000	0	26947000	71899000	26584000	0	0	635790	4682900	11254000	5152800	1264400	0.218991	0.783189	1.13496	0.562249	0.536883	0.722877
PfIT_140058400	rhoptry neck protein 2	13.4521	15.2631	11.6364	15.6254	13.8808	14.2122	19.1938	13.9098	14.5127	15.9805	13.2643	17.4286							8	8	8	4.3	4.3	4.3	254.65	0	8.7309	90434000	9	986230	3460600	280160	4448300	52771000	5689600	1327500	1354400	865810	1670300	2057100	15524000	1027700	0.404659	0.603951	1.12224	0.954552	0.542782	0.74158
PfIT_050022500	serine/arginine-rich splicing factor 1	21.4477	23.6549	22.7254	23.4501	23.7508	23.9904	25.8073	22.7633	24.0427	23.3822	22.0686	25.2303							8	8	8	24.8	24.8	24.8	34.561	0	67.024	2842800000	36	40043000	184920000	97085000	160440000	822070000	153070000	197620000	99671000	61578000	233320000	241940000	551060000	203060000	0.785339	0.424123	1.12111	1.7022	0.663167	0.844025
PfIT_130057700	conserved Plasmodium protein, unknown function	16.4321	18.3801	17.0275	18.74	18.8514	17.6073	20.2599	17.4734	16.052	19.0345	18.1708	17.6522							9	9	9	5.9	5.9	5.9	190.62	0	12.501	320510000	23	6719900	25929000	10153000	33274000	95423000	40810000	35947000	13831000	22427000	15175000	5163500	15655000	4217200	0.732854	0.453256	1.11969	1.59936	0.181011	0.823107
PfIT_110043200	conserved Plasmodium protein, unknown function	16.6051	20.5911	17.74	19.4981	19.6094	19.1823	22.0951	18.8687	16.6475	20.8125	20.892	18.3261							24	24	24	14.8	14.8	14.8	222.96	0	59.816	1228600000	53	9270700	146900000	20360000	68867000	416660000	171270000	74387000	44518000	180970000	55327000	9546900	30561000	13211000	0.396159	0.611252	1.11786	0.937358	0.170522	0.830973
PfIT_080017500	RNA-binding protein, putative	17.1142	19.6734	18.2091	18.296	20.7425	19.3098	20.1831	19.0372	16.2992	17.3505	19.331	19.7173							9	9	9	9.7	9.7	9.7	117.08	0	10.77	352730000	16	6668100	39298000	14243000	15127000	55955000	7854800	82456000	25286000	30996000	30544000	3790100	40512000	7504900	0.471689	0.548419	1.1172	1.08859	0.0433918	0.9469
PfIT_130051600	DNA/RNA-binding protein Alba 2	19.1163	20.7029	19.5488	20.7331	20.486	21.4845	24.4128	19.8016	21.3487	22.0576	21.2809	22.995							7	7	7	31.3	31.3	31.3	24.984	0	14.592	503800000	33	5683000	17069000	7669700	17429000	223350000	43651000	14686000	9138600	25480000	29342000	26706000	83598000	50380000	0.926613	0.360511	1.11185	1.98289	0.65049	0.83453
PfIT_100006600	RNA-binding protein, putative	22.6978	26.4943	24.2476	24.6549	26.5746	25.5314	27.3919	25.3823	23.9523	24.9316	25.9203	25.4839							12	12	12	41.1	41.1	41.1	29.749	0	305.58	5396900000	69	54425000	756280000	159340000	211320000	1408900000	256010000	799530000	349890000	508030000	387970000	129860000	375420000	674620000	0.3764	0.625733	1.10705	0.897185	0.299296	0.711311
PfIT_080018000	conserved Plasmodium protein, unknown function	18.9127	21.7861	20.2399	20.9872	21.9259	21.3312	23.7693	20.5002	18.625	20.8977	20.9087	21.038							15	15	15	28.4	28.4	28.4	70.536	0	97.427	907750000	85	12338000	90408000	30958000	51965000	357450000	48839000	99604000	37077000	49215000	65961000	10107000	53828000	36310000	0.558908	0.516112	1.10184	1.26016	0.140558	0.856606
PfIT_110026000	protein GCN20	14.9868	16.0939	13.4199	16.2201	16.7654	14.7857	20.6437	12.9727	13.1859	17.2131	17.0661	15.3912							9	9	9	12.6	12.6	12.6	95.374	0	24.733	85738000	10	0	2657900	0	2900800	62252000	5773800	4233300	0	5214400	1073300	0	1633000	2256300	0.486713	0.548533	1.09018	1.11833	0.104742	0.8804
PfIT_060031600	acetyl-CoA synthetase, putative	14.5418	16.8745	14.7213	17.7391	15.1019	16.5083	20.1297	11.7029	17.4131	18.2685	14.4134	18.9884							5	5	5	5.4	5.4	5.4	113.82	0	6.7505	121390000	9	1073300	5406600	1215500	9844600	51626000	14210000	1582500	0	981960	4194800	7854100	23404000	2697600	0.428136	0.595255	1.0706	1.00179	0.148753	0.852525
PfIT_110009600	histone H2B	22.6747	24.4471	21.9507	24.4385	24.3246	23.5189	26.8894	23.4793	23.341	24.909	23.3679	24.7281							5	5	5	39.3	39.3	39.3	13.125	0	23.563	2449100000	23	53560000	182980000	32427000	181890000	994490000	252020000	168090000	93556000	86597000	96159000	84997000	222320000	306140000	0.601855	0.480327	1.06985	1.344	0.488773	0.710264
PfIT_050009100	60S ribosomal protein L31	22.1269	23.0593	22.0674	23.1739	23.9474	23.294	25.2942	24.6574	22.3709	23.49	23.0461	23.7059							3	3	3	26.7	26.7	26.7	14.065	0	3.4186	643200000	6	18320000	34963000	17580000	37854000	164580000	47125000	64709000	105850000	34644000	41141000	21695000	54734000	160800000	1.23393	0.24446	1.05391	2.62726	0.829911	1
PfIT_110013000	casein kinase 2, alpha subunit	18.6766	20.631	18.7094	20.4694	20.6968	20.0088	22.9964	20.3177	19.9359	21.0297	19.8562	21.8954							8	8	8	30.7	30.7	30.7	39.89	0	72.189	438240000	30	7542100	29231000	7715800	26133000	150610000	38535000	30595000	23523000	17084000	18991000	18054000	70217000	24346000	0.710053	0.465726	1.05266	1.55483	0.684155	0.905566
PfIT_110049300	coatomer subunit gamma, putative	13.0723	14.6205	13.6971	16.4195	14.2142	13.8834	15.1328	15.8349	15.2069	16.307	15.0557	15.5257							2	2	2	1.9	1.9	1.9	124.25	0.007617	1.5206	22717000	3	0	1360200	717160	4733300	1940100	4378200	1026400	3156400	0	816060	2042300	2547400	420690	0.497811	0.53938	1.04245	1.14024	1.47372	0.748444
PfIT_050036000	formin 1	15.2725	19.4103	16.0354	17.1523	18.9236	17.7437	18.921	18.8191	18.4194	19.2367	18.151	18.6128							11	11	11	3.9	3.9	3.9	316.92	0	16.67	557060000	36	5145600	90581000	8731600	18937000	64526000	80309000	64644000	60127000	37838000	28532000	45576000	52114000	4285100	0.306615	0.676492	1.0338	0.752501	0.639017	0.810057
PfIT_110008700	chromatin remodeling protein	17.2282	16.5947	15.0145	19.1595	15.5017	17.2695	21.7112	16.9304	16.343	18.9394	17.3797	17.9616							18	18	18	13.2	13.2	13.2	167.32	0	29.527	412120000	26	11207000	7224700	2416300	42746000	250630000	36698000	3386800	9118100	12449000	11534000	6068100	18634000	5645400	0.343009	0.643549	1.03107	0.828554	0.489604	0.712418
PfIT_030012000	60S ribosomal protein L7, putative	21.8029	24.4944	23.1834	23.7623	24.9349	23.869	26.5483	24.0195	23.5662	24.6943	24.5677	24.9799							13	13	13	46.3	46.3	46.3	30.523	0	91.138	3111100000	79	36588000	236350000	95256000	142290000	981350000	271470000	320730000	170060000	248660000	153210000	124200000	330900000	311110000	0.524335	0.53406	1.02849	1.19243	0.569925	0.73623
PfIT_130064800	CUGBP Elav-like family member 1	16.3502	18.2558	15.9428	18.1645	17.9774	17.4918	21.3327	16.6066	17.4032	18.4486	16.6802	17.74							4	4	4	9.2	9.2	9.2	57.114	0	40.247	100620000	15	1754400	6573000	1322700	6169900	55461000	7512600	5419500	2095600	2205200	3870600	3640200	4597200	4791500	0.624741	0.474757	1.02828	1.38859	0.418804	0.692632
PfIT_130053900	conserved Plasmodium protein, unknown function	13.3891	21.4092	15.806	16.9465	17.7318	19.0087	19.6502	16.8267	18.6676	19.109	16.9434	19.9774							8	8	8	20.5	20.5	20.5	44.37	0	8.3217	156240000	12	0	64053000	1317700	2905000	18925000	13005000	5006600	2673500	2898700	12132000	9577300	23743000	6792900	0.157097	0.826466	1.02759	0.419396	0.236702	0.776881
PfIT_120027400	endoplasmin, putative	17.3076	21.1171	17.4263	17.9323	20.8323	20.1508	21.2747	20.108	21.3698	20.5479	21.0626	21.9554							14	14	14	23.1	23.1	23.1	95.017	0	220.1	942860000	71	7624300	106900000	8277900	11756000	119240000	72052000	87751000	53114000	102940000	54712000	127370000	191130000	20061000	0.267565	0.723738	1.02145	0.66913	0.80955	0.970286
PfIT_140074400	conserved Plasmodium protein, unknown function	16.7893	17.739	16.8568	19.0292	18.231	17.1824	20.2788	17.0944	17.3604	18.5294	17.7835	17.4551							15	15	15	6.5	6.5	6.5	295.75	0	29.109	452920000	26	13478000	26033000	14124000	63664000	151380000	45026000	36611000	16653000	26848000	17700000	20025000	21382000	3806100	0.760928	0.440838	1.01915	1.6543	0.451338	0.698834
PfIT_130056700	60S ribosomal protein L17, putative	23.1829	25.3837	23.7076	23.7718	25.8593	25.6475	26.1073	25.3899	23.558	23.662	24.9293	24.7585							7	7	7	32	32	32	23.414	0	323.31	3969700000	42	95226000	437780000	136990000	143230000	722900000	132730000	608740000	439670000	319500000	525630000	123500000	283830000	396970000	0.460963	0.557915	1.0015	1.0673	0.387329	0.698118
PfIT_030022100	conserved Plasmodium protein, unknown function	12.2455	13.9044	12.3577	15.845	13.3298	12.2674	17.5445	21.0145	13.8809	15.2027	13.2571	14.1382							8	8	8	2.3	2.3	2.3	405.77	0	8.8761	362080000	7	0	2269300	0	8711200	28293000	5581300	1523900	313520000	1448900	729680	0	0	2446500	0.340487	0.643426	0.97823	0.823328	1.02462	0.91929
PfIT_140015200	40S ribosomal protein S8e, putative	24.7588	26.7897	25.8971	25.8171	27.5338	27.0269	27.8099	26.3625	25.5369	25.928	27.2549	27.2403							11	11	11	50.9	50.9	50.9	25.051	0	323.31	9449000000	110	198720000	812040000	437430000	413840000	1647100000	446910000	1360200000	603960000	1121100000	957210000	340790000	1109800000	1349900000	0.557254	0.517059	0.977404	1.25693	0.353769	0.71163
PfIT_130046500	60S ribosomal protein L18, putative	25.1229	27.6872	26.3028	26.3647	28.1201	27.5582	28.538	27.602	26.1302	26.3085	27.3553	27.3813							14	14	14	58.7	58.7	58.7	21.746	0	222.33	16062000000	146	292320000	1728900000	662260000	691300000	3118200000	664870000	2333800000	1629800000	1373600000	1581000000	587560000	1398600000	2007800000	0.467649	0.551112	0.976692	1.08058	0.443176	0.685429
PfIT_110048800	transcription initiation factor IIF subunit beta, putative	13.6316	13.5719	18.1176	17.856	13.6942	16.6846	21.4809	10.5832	15.832	18.6572	19.017	17.5161							4	4	4	15.4	15.4	15.4	36.8	0	3.2179	84334000	4	0	0	5119300	4270300	52684000	7441500	0	0	9549400	1896000	0	3374000	4685200	0.19076	0.805135	0.971244	0.498147	0.0873882	0.895718
PfIT_020017000	conserved Plasmodium protein, unknown function	12.7106	13.5907	12.2277	14.8471	12.4556	14.1368	16.2293	14.2262	12.6798	14.2881	13.4453	14.5525							2	2	2	0.5	0.5	0.5	475.69	0.0046243	1.718	36449000	2	0	2344100	0	5599800	14597000	3801000	0	0	2119300	3422600	0	4565600	191840	0.524315	0.532843	0.970162	1.19239	0.627013	0.780342
PfIT_080012700	conserved Plasmodium protein, unknown function	13.7935	15.6321	15.0281	15.6053	16.419	15.3372	16.7056	15.1993	14.229	14.919	15.4287	15.5603							1	1	1	0.9	0.9	0.9	161.29	0.00783	1.5848	31605000	7	795170	2844000	1871100	2791700	5985400	1734900	4906900	2106800	2469900	2318200	1075300	2705900	564380	0.70005	0.464578	0.969265	1.53531	0.245717	0.766726
PfIT_060009100	RNA-binding protein, putative	15.5372	18.0386	16.7289	19.2783	16.199	17.7165	21.1439	15.0354	18.5846	19.6162	16.0934	19.6691							6	6	6	8.6	8.6	8.6	85.63	0	10.058	201930000	19	1664300	9423700	3801600	22254000	81099000	28127000	2633100	0	2447200	7538400	13759000	29179000	5769300	0.348918	0.645168	0.963039	0.840773	0.318323	0.703899
PfIT_140067800	conserved Plasmodium protein, unknown function	18.216	20.329	18.4574	19.2691	20.5493	20.0642	22.1807	20.5074	20.8844	20.4096	19.2883	21.364							7	7	7	26.7	26.7	26.7	36.959	0	24.445	363130000	21	6089600	26343000	7198600	12636000	95080000	27856000	30689000	29811000	12805000	21926000	38714000	53980000	18156000	0.556318	0.517652	0.960097	1.2551	1.22721	0.891179
PfIT_130057000	inner membrane complex protein 1f, putative	20.1879	24.9936	19.6213	21.945	23.1476	22.5738	24.5353	22.787	21.8719	22.7999	22.5372	23.2643							49	49	49	40.1	40.1	40.1	151.57	0	323.31	7285300000	234	76442000	2137900000	51614000	258390000	1556200000	467330000	594720000	463180000	389530000	399540000	245630000	644820000	113830000	0.213031	0.789665	0.954571	0.548848	0.320085	0.707581
PfIT_040019900	nuclear cap-binding protein, putative	19.5028	19.6413	19.8681	20.4767	20.708	20.6623	23.8338	19.7511	19.5156	20.5295	20.3105	21.5146							11	11	11	39.3	39.3	39.3	28.004	0	15.419	327170000	20	8172000	8995000	10527000	16051000	164470000	16648000	18842000	9706800	14304000	18254000	8244800	32956000	29743000	2.74829	0.0535652	0.944949	7.39279	0.41201	0.694527
PfIT_100016900	autophagy-related protein 18, putative	18.752	21.0225	18.1682	19.2366	21.6687	19.8456	23.3577	19.1616	16.9686	20.1287	19.8816	19.8841							7	7	7	22.6	22.6	22.6	43.531	0	39.466	468370000	19	9270900	44732000	6185500	12972000	225730000	24074000	70009000	12316000	20285000	19785000	2693200	20320000	22304000	0.340623	0.644872	0.936115	0.823611	0.0886059	0.89571
PfIT_130061400	conserved Plasmodium protein, unknown function	17.8039	13.6547	16.8307	17.1159	17.1897	16.7624	17.4269	17.591	16.9355	17.1481	16.8846	17.6224							2	2	2	1.6	1.6	1.6	166.23	0.0013351	2.5476	123490000	6	16475000	0	8392300	10227000	12686000	10457000	10763000	14215000	8712200	8004400	9024700	14527000	1715100	0.298485	0.689092	0.926248	0.735305	0.408894	0.696676
PfIT_140070200	conserved Plasmodium membrane protein, unknown function	13.729	14.3849	12.1527	14.8963	14.5381	13.5571	18.1979	13.8736	13.885	15.2902	13.6246	15.3962							3	3	3	3.2	3.2	3.2	126.13	0.0012903	2.3605	23424000	3	0	1091100	0	1555300	15335000	0	1213300	0	644110	614690	771600	2199300	459300	0.514759	0.53222	0.908329	1.17361	0.526612	0.702556
PfIT_020016800	peptide chain release factor subunit 1, putative	15.3385	18.8985	19.9037	21.3061	17.8783	17.6787	21.8539	16.8327	17.5662	19.5297	16.622	19.7191							9	9	9	25.1	25.1	25.1	48.063	0	31.026	280160000	25	1118700	13194000	26483000	70005000	102340000	20436000	6505400	3151400	2723200	5664800	5240000	23303000	10376000	0.191237	0.80588	0.907468	0.499244	0.123085	0.865531
PfIT_070009700	conserved Plasmodium protein, unknown function	13.2914	18.0506	14.1637	16.185	17.3956	14.6361	19.5858	13.1596	16.6368	18.2667	14.4955	16.9498							6	6	6	5.6	5.6	5.6	152.7	0	14.429	125250000	7	0	17920000	0	4917100	51935000	20814000	11380000	0	1524500	1680600	6725600	8355200	1897800	0.210081	0.79097	0.903639	0.54219	0.212018	0.793972
PfIT_130076500	Plasmodium exported protein, unknown function	12.1635	13.7661	14.8947	15.4351	16.4814	11.493	19.5801	16.0932	13.3034	15.1579	15.9954	16.5649							5	5	5	32.4	32.4	32.4	58.694	0	17.206	40220000	9	0	0	1005300	1462000	25865000	1206400	3019300	2307000	2155800	0	0	3199100	1218800	0.192889	0.807479	0.861709	0.503038	0.616092	0.780147
PfIT_140022700	protein SEY1, putative	13.1669	18.4446	16.4113	17.1481	16.4224	17.0334	19.6245	14.6982	15.7901	18.1305	17.2791	17.6521							6	6	6	7.3	7.3	7.3	109.91	0	6.7758	115380000	15	0	17482000	4270600	7116800	39605000	14062000	4303700	1302600	7793700	6572700	2776500	10093000	2354600	0.21527	0.786651	0.860335	0.553889	0.11837	0.8681
PfIT_100034100	conserved Plasmodium protein, unknown function	13.1122	20.5963	12.7424	14.0082	17.0167	17.9829	18.9614	13.629	19.0569	17.5656	17.7234	20.0454							4	4	4	10.8	10.8	10.8	51.83	0	4.216	76931000	5	0	26951000	0	0	8677800	3297800	2254300	0	3678900	4403900	9271300	18396000	4525300	0.10908	0.87158	0.852294	0.301733	0.215475	0.791675
PfIT_130057800	thioredoxin-related protein, putative	18.7448	21.2218	18.6586	20.8439	21.1404	19.1811	22.4315	21.0099	19.1286	21.6148	20.7297	21.0093							4	4	4	19.7	19.7	19.7	23.988	0	3.5122	187910000	11	3514300	19565000	3310400	15056000	45252000	25692000	18492000	16893000	13911000	4755100	4585500	16886000	23489000	0.336711	0.644909	0.84673	0.815493	0.443602	0.687108
PfIT_050017700	ras-related protein Rab-1B	19.6151	22.5357	19.4157	20.7884	22.2836	21.0228	21.8729	20.3925	22.048	21.8595	20.5947	22.2131							3	3	3	14.5	14.5	14.5	22.886	0	4.0987	582930000	27	12848000	97281000	11190000	28976000	61451000	60884000	81686000	22022000	25337000	34087000	69378000	77789000	36433000	0.309762	0.675339	0.842764	0.759136	0.331844	0.708535
PfIT_110010000	40S ribosomal protein S4, putative	23.4462	25.6976	23.55	25.0055	25.5394	24.6635	26.5955	24.829	24.1061	25.0762	24.9904	24.7785							18	18	18	64.4	64.4	64.4	29.772	0	74.226	6942300000	95	182870000	870660000	196510000	538910000	1622400000	565990000	780250000	476860000	533300000	425190000	288920000	460440000	433890000	0.466897	0.551253	0.838188	1.07909	0.381602	0.701256
PfIT_120024400	clathrin heavy chain, putative	13.193	15.4894	11.939	16.2096	14.1334	12.7638	17.5285	14.5337	13.9743	13.8945	16.9624	13.5754							2	2	2	1.1	1.1	1.1	233.22	0	4.9631	45359000	2	0	0	0	8184900	20419000	1644800	0	0	13792000	0	0	1318300	419990	0.224204	0.780016	0.828487	0.573913	0.523465	0.699465
PfIT_130073500	ABC transporter E family member 1, putative	13.0137	17.2205	14.7625	16.3612	15.1194	15.9653	18.954	11.8315	16.5551	16.1057	12.8167	18.0305							2	2	2	3.9	3.9	3.9	70.283	0.0012107	1.9679	41813000	2	0	4886900	889440	2693800	16251000	2256600	1139000	0	0	2047400	3081300	8567600	1306600	0.254537	0.737214	0.816379	0.640841	0.117373	0.868307
PfIT_120023600	AP-2 complex subunit mu, putative	17.7415	20.9026	19.1214	20.1195	20.6474	19.4337	21.4818	19.106	18.4258	20.3933	20.3099	20.0625							8	8	8	16.6	16.6	16.6	72.786	0	46.599	401840000	22	6354900	56850000	16539000	33033000	84930000	39939000	47630000	16364000	37694000	20536000	10212000	31755000	13856000	0.342793	0.642658	0.811653	0.828107	0.116145	0.870071
PfIT_140030600	60S ribosomal protein L5, putative	24.1459	26.0593	25.0243	25.2515	26.2446	26.1639	28.4335	26.1072	25.1025	25.6439	26.0336	26.8827							20	20	20	56.8	56.8	56.8	33.998	0	236.48	14461000000	154	259880000	978920000	477730000	559240000	5075200000	734000000	1113100000	1012000000	961690000	1052500000	504350000	1732400000	1032900000	0.563794	0.513384	0.810172	1.26971	0.579784	0.751853
PfIT_140077600	diacylglycerol kinase, putative	15.8539	18.6522	16.9926	18.2074	19.1884	16.5303	19.9998	15.3504	17.8421	18.7178	16.4225	18.8226							2	2	2	3.8	3.8	3.8	57.642	0.0097192	1.5025	104280000	2	1599000	11123000	3520700	8172100	28307000	11641000	16131000	0	2371500	2555600	6344300	12518000	3862400	0.291379	0.697987	0.809177	0.720209	0.13234	0.858365
PfIT_130066200	polyadenylate-binding protein, putative	19.0329	21.0033	18.992	20.2055	20.8256	20.3777	22.7195	20.2094	20.0815	20.7675	20.1953	21.5008							3	3	3	9.3	9.3	9.3	44.813	0	19.287	432650000	21	10192000	39937000	9906200	22973000	131220000	33916000	35307000	23035000	22811000	25885000	21081000	56382000	22771000	0.503637	0.540594	0.793505	1.15172	0.539895	0.732258
PfIT_100038800	methionine--tRNA ligase	16.033	18.187	16.0002	16.7248	18.1058	17.7493	20.2223	15.4058	18.1566	16.825	15.8286	19.0711							5	5	5	8	8	8	104.17	0	7.2298	162960000	10	3285600	14622000	3211700	5307000	59941000	5689000	13822000	2127200	2851500	10796000	14318000	26987000	3325700	0.399257	0.607863	0.786557	0.943629	0.308304	0.702528
PfIT_140052300	ATP-dependent RNA helicase DDX5, putative	21.8574	22.8713	23.2671	22.9392	23.9499	23.4621	25.4316	23.1422	21.7995	23.3242	24.0324	23.5674							28	28	28	61.1	61.1	61.1	60.035	0	148.85	5446900000	136	132990000	268550000	353310000	281490000	1584000000	367580000	567180000	324010000	600520000	404460000	127750000	435080000	155630000	0.700266	0.4664	0.785149	1.53573	0.279536	0.731729
PfIT_120028500	phospholipid-transporting ATPase, putative	13.1707	15.961	14.0458	15.029	15.6652	14.8328	17.793	13.9658	13.7896	15.5955	14.7371	14.8757							2	2	2	1.5	1.5	1.5	190.46	0.009636	1.48	40754000	2	0	4911600	1302300	2574400	17488000	3812400	4001200	0	2102800	2247000	0	2315000	529280	0.382309	0.619427	0.78319	0.909229	0.196699	0.806563
PfIT_120048000	40S ribosomal protein S17, putative	21.8311	23.6299	22.3279	22.9319	24.0885	23.0949	25.3753	22.9755	22.7462	23.5931	23.4112	24.1029							9	9	9	56.9	56.9	56.9	16.067	0	26.077	1101900000	57	26117000	90870000	36853000	56014000	304670000	88575000	124870000	57733000	78086000	62715000	49249000	126130000	157410000	0.527711	0.534883	0.775483	1.19905	0.480352	0.706
PfIT_070018500	conserved Plasmodium protein, unknown function	16.3387	20.295	16.866	18.7489	18.3163	18.735	20.8885	17.8287	18.4144	18.9037	18.5694	18.5991							13	13	13	10.3	10.3	10.3	159.73	0	51.071	383020000	30	4889700	75901000	7047700	25991000	114530000	28936000	19258000	13734000	22950000	25743000	20613000	23429000	6491900	0.242402	0.75307	0.766808	0.614251	0.319032	0.704767
PfIT_140030900	60S ribosomal protein L7-3, putative	23.0939	24.057	22.6189	24.1975	24.1624	23.7021	26.8252	23.211	23.8563	24.8239	23.3956	24.7068							10	10	10	36.7	36.7	36.7	32.681	0	40.195	2964200000	57	89528000	174530000	64412000	192390000	1189000000	296990000	187760000	97100000	110350000	136470000	151870000	273840000	296420000	0.779074	0.425235	0.764072	1.6899	0.504946	0.713819
PfIT_110009500	histone H4	22.9589	24.596	23.454	23.8814	25.5533	23.8571	26.4296	23.9922	23.894	24.6369	24.056	25.1063							7	7	7	58.3	58.3	58.3	11.455	0	19.843	1963200000	47	48918000	152150000	68943000	92718000	542310000	156540000	295430000	100120000	104640000	91168000	93536000	216720000	327200000	0.440214	0.580773	0.760967	1.02596	0.501523	0.712243
PfIT_100012000	eukaryotic translation initiation factor 3 subunit D, putative	18.8611	20.5597	19.758	20.4418	20.5745	20.4331	22.4414	19.3748	19.9905	20.4705	19.8255	21.3032							10	10	10	20.6	20.6	20.6	63.123	0	25.225	649990000	43	15714000	51004000	29259000	47003000	187950000	47947000	51530000	22434000	30660000	46718000	34375000	85394000	19697000	0.700419	0.467748	0.756856	1.53603	0.342967	0.705635
PfIT_070033000	conserved Plasmodium protein, unknown function	17.325	17.5431	16.0213	17.8878	18.2807	16.9853	19.931	17.9868	16.1479	18.0377	17.391	17.3354							10	10	10	4.6	4.6	4.6	300.29	0	25.788	378290000	27	20360000	23683000	8247300	30074000	123950000	33368000	39487000	32211000	21311000	16088000	9003800	20508000	3050700	0.546646	0.525571	0.754767	1.23617	0.372349	0.700936
PfIT_140022000	conserved Plasmodium protein, unknown function	12.3319	19.2245	18.5322	15.0568	19.0864	18.1829	17.5445	17.3511	18.1108	16.9599	18.3019	17.9262							4	4	4	4.9	4.9	4.9	177.23	0	4.8065	233030000	10	376350	44718000	27674000	0	13955000	9305700	40634000	12205000	23591000	21722000	20664000	18182000	3192200	0.107335	0.872803	0.745795	0.297318	0.166413	0.83216
PfIT_130014000	mRNA-decapping enzyme 2, putative	12.9109	17.9418	13.7249	15.97	16.1921	14.6361	19.536	12.2715	13.7366	13.8965	15.7545	16.1713							7	7	7	7.2	7.2	7.2	137.77	0	9.8647	77481000	8	0	15358000	825910	0	46372000	930240	4567200	0	3372100	1553200	0	4501800	1270200	0.171428	0.816882	0.7402	0.453256	0.0404136	0.949043
PfIT_120028200	cAMP-dependent protein kinase regulatory subunit	18.589	20.4108	16.6659	20.2432	18.9699	18.6432	23.2522	18.39	19.1318	21.0311	19.1507	19.9902							13	13	13	28.3	28.3	28.3	50.836	0	20.995	487010000	31	10252000	36245000	2703400	32268000	259760000	55714000	13350000	8931200	15132000	10645000	14936000	27078000	18731000	0.242995	0.754893	0.730196	0.615556	0.385603	0.700373
PfIT_030008000	HAD superfamily protein, putative	14.3932	16.279	12.3704	16.1586	14.0577	15.0131	18.8536	11.719	15.6345	16.3899	14.2005	16.4192							4	4	4	3.7	3.7	3.7	136.51	0	5.8022	55182000	7	0	4771100	0	4389000	28422000	5152300	1023200	0	1129600	1984000	3052200	5258200	919700	0.221913	0.780169	0.728944	0.568792	0.169447	0.831021
PfIT_140023800	NOT family protein, putative	12.2386	20.5977	14.5226	16.1651	17.2183	16.1404	19.6911	16.0963	13.703	16.8542	16.2013	16.9185							26	26	26	6.7	6.7	6.7	519.41	0	55.52	584770000	37	894060	293550000	4354300	13595000	156600000	21917000	28208000	12961000	13940000	13364000	2467100	22916000	3160900	0.103041	0.876111	0.721633	0.286411	0.0826243	0.900609
PfIT_130031600	RNA-binding protein, putative	16.6556	18.2029	17.4436	17.8265	18.1225	18.4903	19.85	17.8084	16.4068	17.818	17.8022	18.6075							2	2	2	4.4	4.4	4.4	62.538	0	3.5181	78976000	11	2271200	6637800	3921700	5113600	20791000	5083500	6278400	5050100	5028100	8101400	1911400	8787100	3589800	0.66413	0.468116	0.712411	1.46531	0.207682	0.796737
PfIT_080012400	ras-related protein Rab-18	20.9246	23.314	20.8444	21.9912	23.0588	22.1638	23.6158	22.2723	22.4685	22.3551	21.6015	23.4153							7	7	7	38.3	38.3	38.3	23.162	0	17.989	753640000	44	19904000	104280000	18827000	41687000	128550000	53647000	87378000	50656000	31820000	46985000	58037000	111870000	75364000	0.33485	0.646235	0.710272	0.811627	0.526372	0.699925
PfIT_130059700	large subunit rRNA methyltransferase, putative	14.3263	16.921	15.6995	16.8129	15.8605	16.3933	19.2347	15.1924	15.1909	16.8915	11.3923	16.6785							4	4	4	3.8	3.8	3.8	119.67	0	3.0065	61610000	4	944930	5708300	2447800	5295900	28377000	5592800	2736700	1722400	0	3959300	0	4825000	1339400	0.37038	0.62296	0.706603	0.884882	0.225772	0.783085
PfIT_040027800	conserved Plasmodium protein, unknown function	13.0299	17.2033	12.1324	12.5439	17.217	14.7107	19.8967	16.5952	16.5235	17.7054	17.2237	17.9813							2	2	2	2.6	2.6	2.6	57.609	0	3.5839	48258000	7	0	3470900	0	0	22451000	4915800	3504100	2277100	3520300	0	2166600	5951400	2098200	0.124369	0.852383	0.702011	0.339966	0.860546	1
PfIT_020015200	conserved Plasmodium protein, unknown function	16.9002	18.3824	12.981	16.5781	16.5072	17.2732	18.6921	17.2318	17.7488	16.9313	16.313	18.9992							2	2	2	7.4	7.4	7.4	53.674	0.00358	1.8655	58538000	4	3057800	8542800	0	2446000	10588000	3124500	2328700	3848000	2035300	3960100	5506600	13100000	2341500	0.160925	0.826388	0.698314	0.428492	0.46816	0.698662
PfIT_140072200	40S ribosomal protein S3	23.8163	25.9682	24.1415	24.3806	26.5332	25.0999	27.2072	26.2272	24.7251	24.9571	25.7556	25.3486							17	17	17	57.5	57.5	57.5	24.668	0	323.31	9058400000	104	206800000	919020000	259080000	305790000	2169400000	456010000	1359600000	1099800000	793120000	503440000	388270000	598160000	647030000	0.30797	0.676243	0.695913	0.755359	0.647665	0.819929
PfIT_140019100	actin II	12.7986	19.3411	15.8541	16.5947	15.9706	17.5097	19.7575	13.1133	18.4066	16.5114	13.6529	18.7648							7	5	5	25	17.8	17.8	42.605	0	5.6856	59762000	7	0	13947000	1243900	2078300	18613000	1961800	1348500	0	0	3918900	7297300	9353800	2845800	0.131353	0.844756	0.693698	0.357179	0.146861	0.854079
PfIT_020012200	serine repeat antigen 6	12.8534	15.835	11.7438	14.4185	13.1185	14.956	17.4695	15.5283	13.4063	15.0242	14.3076	15.8834							3	3	3	3.5	3.5	3.5	118.84	0	3.0663	21603000	3	0	3273300	0	0	10163000	1866100	0	0	1135500	1779900	0	3385100	385780	0.197463	0.801875	0.686973	0.513515	0.515615	0.703182
PfIT_120044700	conserved Plasmodium protein, unknown function	16.1359	16.3865	14.7747	17.2456	16.6949	15.4012	18.9853	15.7643	15.5649	17.1161	15.4823	17.7134							24	24	24	4.3	4.3	4.3	692.26	0	32.298	497350000	32	23619000	28099000	9194200	50970000	170220000	46594000	34797000	18256000	15015000	14194000	15899000	70491000	1516300	0.387312	0.617798	0.68157	0.919407	0.342242	0.70532
PfIT_130065000	conserved Plasmodium protein, unknown function	14.4741	17.3717	12.9235	15.1912	16.5154	15.0939	16.9507	12.5706	14.4115	14.8136	14.5745	14.6076							4	4	4	2.3	2.3	2.3	233.93	0	10.4	57501000	12	2207600	16450000	753580	3628900	12287000	2793200	9086500	0	2366600	3392200	2113800	2421500	592790	0.187204	0.809067	0.677034	0.489953	0.0527416	0.93694
PfIT_090009800	nucleoporin NUP100/NSP100, putative	16.5534	18.6386	15.1423	18.2031	16.025	18.125	19.0799	15.6801	16.5438	18.182	16.0701	17.2151							7	7	7	6	6	6	234.97	0	15.741	178730000	22	7116900	30199000	2676200	22332000	41007000	22007000	4934600	3885200	5091000	21155000	7070100	11259000	2415300	0.210123	0.79254	0.672997	0.542284	0.0791724	0.903116
PfIT_090034000	high molecular weight rhoptry protein 2	17.0948	21.4866	16.2679	18.051	19.6215	19.1858	21.5303	17.62	19.8209	19.9555	18.7961	19.9792							23	23	23	21.7	21.7	21.7	162.59	0	37.413	919490000	67	11198000	235070000	6312600	21726000	242300000	81338000	64531000	16115000	36415000	47708000	74091000	82685000	11494000	0.147856	0.831593	0.669708	0.397278	0.279775	0.73333
PfIT_080032800	protein disulfide isomerase	18.3326	19.8126	18.0724	18.667	19.8677	19.6735	20.2262	19.2933	20.7998	20.472	20.2042	22.1814							6	6	6	14.5	14.5	14.5	55.491	0	8.2066	386070000	11	8582700	23942000	7166500	10822000	31892000	37814000	24874000	16705000	31409000	21741000	47460000	123660000	14849000	0.431903	0.593049	0.663534	1.00934	0.915449	0.978293
PfIT_050023700	ATP-dependent RNA helicase DDX23, putative	14.089	17.4494	16.9052	14.9344	18.3412	17.1446	19.7579	15.5455	15.1895	17.5886	16.5835	15.5953							7	7	7	7.3	7.3	7.3	129.87	0	9.2115	123340000	14	0	10380000	7118900	1816100	51423000	11432000	19261000	2773900	5695800	8403600	2167300	2871200	2126600	0.172954	0.817583	0.65887	0.456833	0.140577	0.858193
PfIT_060021700	histone H3 variant, putative	24.986	27.6804	25.7216	26.6803	27.094	26.5475	29.3703	26.6172	26.3354	27.6767	26.6323	27.244							6	6	4	50.7	50.7	39	15.441	0	189.53	8046500000	27	132920000	860360000	221320000	430170000	2775800000	858180000	573000000	411760000	416090000	392320000	338700000	635780000	2011600000	0.322265	0.662907	0.644587	0.785381	0.448394	0.687633
PfIT_120032800	conserved Plasmodium protein, unknown function	15.5862	18.0423	13.7107	16.9258	15.5644	16.7681	21.0679	11.8812	14.4662	18.7711	16.4272	16.7276							8	8	8	11.5	11.5	11.5	91.294	0	13.009	141280000	8	2016900	11068000	0	5104300	90126000	18342000	1986700	0	3613100	4576100	0	4449200	3445900	0.183974	0.810748	0.63969	0.482487	0.00275218	0.994025
PfIT_030022400	40S ribosomal protein S11, putative	25.3288	27.882	26.521	25.9678	28.0778	27.5946	27.7506	27.1683	25.8733	25.8447	27.167	26.8899							18	18	18	70.8	70.8	70.8	18.76	0	283.89	18819000000	116	463560000	2720900000	1059300000	721920000	2484000000	662850000	3116300000	1659200000	1657600000	2229500000	676120000	1367900000	1710800000	0.259759	0.731423	0.636149	0.652212	0.141937	0.85948
PfIT_140021400	small nuclear ribonucleoprotein-associated protein B, putative	16.8417	18.6937	17.2814	17.5456	19.0493	18.1246	19.9538	17.3067	12.7591	18.6336	17.9538	18.3968							2	2	2	13.9	13.9	13.9	22.332	0.0013089	2.4364	46844000	4	1409400	5088000	1911600	2295700	12186000	4880500	6510400	1945400	3046600	3429400	0	4141700	3903700	0.374591	0.624407	0.634238	0.893491	0.161098	0.837548
PfIT_120010900	zinc finger protein, putative	14.3876	14.7923	11.8165	13.5777	14.2621	15.0518	17.2504	13.4222	14.6969	15.1545	14.6133	15.4481							1	1	1	0.7	0.7	0.7	204.28	0.0068966	1.6799	18915000	1	1114500	0	0	0	8107200	1896600	1021700	0	1303300	1766200	1381000	2324500	363750	0.243456	0.754923	0.631698	0.616571	0.426063	0.691919
PfIT_030025700	histone H2A variant, putative	22.7406	24.9755	24.046	23.946	25.4138	24.2777	25.8795	25.9752	23.7296	24.4648	25.557	24.3363							4	4	3	25.3	25.3	19.6	16.453	0	11.531	2243000000	15	42048000	197940000	103930000	96968000	370400000	138930000	268200000	395800000	296200000	122030000	83457000	127090000	373830000	0.327057	0.655532	0.625125	0.795393	0.58031	0.7584
PfIT_060014300	histone H3	21.8533	25.9391	23.0664	23.8551	24.7693	24.1065	27.524	24.0743	22.6467	25.1091	24.0137	25.5296							5	3	3	50.7	39	39	15.446	0	323.31	1830100000	12	15155000	257330000	35134000	60695000	771970000	144760000	114380000	70655000	67750000	72247000	26267000	193740000	457520000	0.192678	0.806361	0.624057	0.502554	0.235018	0.7761
PfIT_080022700	rhoptry neck protein 5	15.524	19.6313	14.2587	16.8085	17.2873	17.1609	20.0929	16.459	19.3098	18.7119	17.9763	19.0161							10	10	10	9.8	9.8	9.8	133.63	0	20.403	226520000	19	2450100	42228000	0	5968400	58154000	22327000	8317500	4684300	13409000	7620200	33794000	27569000	4356200	0.139604	0.839964	0.614274	0.377326	0.475181	0.705813
PfIT_130011500	26S protease regulatory subunit 10B, putative	15.8798	20.5041	16.7571	18.1848	18.0614	18.7144	20.9096	19.1395	20.0628	18.7841	17.9485	21.4195							8	8	7	26	26	22.9	44.677	0	69.278	206040000	14	1266200	31228000	2326100	6257200	41366000	9479600	5744400	12128000	5312000	9032900	22999000	58904000	9811600	0.158842	0.825176	0.606558	0.423547	0.703265	0.919134
PfIT_110021700	conserved Plasmodium protein, unknown function	12.3622	17.1648	12.4288	12.2209	11.8507	19.6991	22.2302	16.73	16.5021	19.5651	19.4264	21.0641							2	2	2	4.8	4.8	4.8	44.596	0	4.5981	107710000	2	0	1616200	0	0	54120000	8532700	0	1195700	7750500	9362600	1021000	24116000	9792200	0.0703012	0.911377	0.60497	0.200942	0.851491	1
PfIT_140038100	60S ribosomal protein L14, putative	20.4314	22.522	19.3153	22.2358	22.0051	19.8409	24.7097	21.3286	22.1132	23.0093	20.9555	22.9348							6	6	6	35.8	35.8	35.8	19.297	0	9.399	498960000	34	9898300	42160000	4566600	34574000	192070000	59098000	29465000	18435000	14234000	6573400	31756000	56125000	71280000	0.191267	0.807233	0.604378	0.499311	0.637035	0.803506
PfIT_050021400	40S ribosomal protein S11	23.6	25.8391	25.0128	24.1324	26.694	25.4189	26.983	25.8191	24.3309	24.8897	25.8608	25.5824							9	9	9	39.1	39.1	39.1	16.076	0	84.957	3801700000	68	76289000	360160000	203130000	110340000	795870000	186500000	651390000	355210000	365610000	269150000	126620000	301440000	633620000	0.238514	0.756605	0.597808	0.605682	0.371164	0.700235
PfIT_090018700	conserved Plasmodium protein, unknown function	18.8335	20.5744	18.1494	19.2362	20.0943	20.008	22.1155	21.4183	18.7852	21.511	22.2172	20.3391							11	11	11	10.4	10.4	10.4	137.79	0	29.897	1215500000	45	25693000	85879000	15991000	33966000	249910000	164370000	61568000	154140000	268170000	57990000	24847000	72952000	22100000	0.314647	0.670048	0.593743	0.76941	0.566573	0.740793
PfIT_050022200	60S ribosomal protein L12, putative	20.7906	23.0932	21.4709	22.1837	22.6027	22.3054	24.8504	21.6433	23.0622	23.0337	22.4415	23.4768							3	3	3	18.8	18.8	18.8	18.112	0	5.7898	884020000	23	16324000	80536000	26159000	42876000	272250000	77279000	57323000	29480000	51262000	46650000	78821000	105060000	98225000	0.345689	0.642231	0.57907	0.8341	0.536096	0.720819
PfIT_100040600	conserved Plasmodium protein, unknown function	21.2793	23.5619	21.8783	22.2411	23.1181	23.0685	24.6037	22.2319	21.3401	21.8653	22.3318	23.3122							40	40	40	28.4	28.4	28.4	193.17	0	323.31	6501800000	248	175610000	854390000	265990000	342050000	1759100000	263600000	628170000	339880000	364240000	606950000	183170000	718630000	94229000	0.314625	0.668585	0.569407	0.769365	0.152343	0.846983
PfIT_020006800	knob-associated histidine-rich protein	24.9352	28.6315	25.7206	25.9549	28.2962	26.7442	27.5956	26.9836	24.4719	26.4124	27.5429	26.8592							28	28	28	34.1	34.1	34.1	69.148	0	323.31	31962000000	153	577450000	7485100000	995290000	1170800000	3650800000	1607600000	5932900000	2388700000	3519700000	2023400000	418840000	2191300000	1775700000	0.162396	0.825811	0.569321	0.431977	0.0177232	0.975357
PfIT_110033600	parasitophorous vacuolar protein 1	19.0742	21.8366	20.2299	20.0891	20.9402	21.8122	23.1223	20.1216	20.8162	20.419	20.427	21.9841							7	7	7	14.5	14.5	14.5	52.493	0	20.223	565460000	31	9935200	67411000	22135000	20077000	164350000	25234000	36216000	20535000	25374000	66283000	33234000	74669000	31414000	0.236543	0.757206	0.566964	0.601329	0.331321	0.707362
PfIT_130062500;PfIT_130062400	elongation factor 1-alpha	24.8807	26.5326	25.3017	26.3304	25.8001	26.2716	28.7022	25.7293	26.3377	26.8742	26.2235	27.2836							34	34	34	78.3	78.3	78.3	48.958	0	282.45	36047000000	329	834080000	2621000000	1116700000	2278300000	11792000000	3321400000	1577500000	1501900000	2115500000	2187300000	2289800000	4411000000	1335100000	0.464741	0.551406	0.562383	1.07481	0.583284	0.769213
PfIT_120040200	CCR4-NOT transcription complex subunit 4, putative	14.2487	14.0588	12.4312	13.8932	14.1612	14.3387	17.7064	13.9155	13.9837	15.1612	14.8333	16.3205							2	2	2	1.3	1.3	1.3	193.42	0.0014065	2.8146	32041000	2	1323700	1160400	375550	1034600	14544000	2491700	0	1050700	1985100	1409000	1101600	5564900	471200	0.393991	0.611884	0.551517	0.932965	0.516271	0.709358
PfIT_120043700	acyl-CoA synthetase	15.3585	20.088	16.3352	18.1528	17.4886	17.7851	21.6892	12.5286	18.5545	19.5073	18.1919	20.0662							8	8	8	11.4	11.4	11.4	91.863	0	32.731	274720000	24	1470400	39008000	2893600	10200000	118350000	26083000	6436800	0	10480000	7905100	13475000	38424000	7849300	0.139473	0.838787	0.54828	0.377009	0.0366866	0.951152
PfIT_010016100	glutamic acid-rich protein	18.0651	20.8	19.5983	20.3236	21.2433	18.5151	22.2138	19.6446	17.5699	19.4635	19.3443	19.4184							3	3	3	5.2	5.2	5.2	80.199	0	21.533	300610000	19	5484800	36513000	15875000	26243000	97283000	14458000	49649000	16393000	13312000	7492900	3891500	14013000	15030000	0.182481	0.80981	0.539528	0.479027	0.0723108	0.911777
PfIT_100012200	conserved Plasmodium protein, unknown function	11.8563	15.2373	11.4024	14.1753	14.1331	11.7986	17.4071	11.7826	12.2772	14.4621	13.0263	13.0336							7	7	7	2	2	2	453.57	0	9.7566	58527000	9	719320	7493600	525120	3589200	33716000	4378300	3485700	683470	1618400	691100	0	1626700	301690	0.137551	0.842393	0.537017	0.372333	0.173002	0.827931
PfIT_080023200	14-3-3 protein	20.5728	21.2461	19.2105	21.2156	20.674	20.727	23.3596	22.5613	21.8094	22.2227	23.4989	22.567							8	8	8	40.1	40.1	40.1	30.192	0	23.461	919480000	32	26515000	42285000	10313000	41399000	182970000	83205000	28441000	105220000	201510000	29505000	62479000	105630000	54087000	0.352946	0.642534	0.52905	0.849084	1.39339	0.823724
PfIT_080023900	heat shock protein 70	23.9725	25.6898	23.4803	24.915	25.0633	24.7386	27.2473	24.4692	24.9255	26.7161	24.2616	26.0842							36	36	32	50.8	50.8	44.2	74.256	0	323.31	20157000000	354	559630000	1840300000	397870000	1075500000	5416400000	3748000000	1192000000	789650000	683850000	951790000	1083500000	2418900000	592870000	0.317776	0.668158	0.524783	0.775978	0.462336	0.696167
PfIT_140022800	metacaspase-like protein	13.0605	15.5913	12.3311	14.4228	14.8796	13.2525	18.8301	12.4023	13.9052	16.2507	13.1694	15.4538							9	9	9	4.2	4.2	4.2	265.7	0	8.4816	78267000	9	0	5331700	0	2372000	50334000	8421000	3255600	0	994940	1054000	1656900	4847100	724690	0.18128	0.807486	0.523999	0.476241	0.252234	0.757551
PfIT_140067100	60S ribosomal protein L27	23.7513	24.9861	23.8052	24.7713	24.9512	24.3859	27.1024	24.4363	24.2461	25.2365	24.5546	25.6867							11	11	11	63.7	63.7	63.7	16.745	0	42.284	3599100000	73	112960000	265860000	117260000	229090000	1152800000	316250000	259500000	181620000	197140000	175380000	159190000	432060000	449880000	0.52661	0.532704	0.521915	1.19689	0.464359	0.69929
PfIT_100018600	transcriptional coactivator ADA2	15.4183	19.0427	13.1879	16.2466	17.3364	15.6247	18.4885	14.7746	16.4749	17.0935	14.4868	17.6565							5	5	5	2.5	2.5	2.5	299.35	0	54.694	184070000	10	4685500	57784000	998460	8319500	39352000	14964000	17708000	2999000	0	5406100	9746200	22106000	1720300	0.105342	0.874857	0.519604	0.292265	0.126605	0.864348
PfIT_100014600	eukaryotic translation initiation factor 2 beta subunit, putative	18.231	19.5803	18.3976	19.4434	19.1949	19.121	22.2389	18.6402	19.7021	19.8548	19.2119	20.3027							4	4	4	19.4	19.4	19.4	25.322	0	3.98	185700000	9	4614900	11758000	5179900	10694000	74243000	14222000	9002100	6128600	9108300	8552400	12795000	19401000	12380000	0.52103	0.532847	0.516815	1.18594	0.563191	0.741443
PfIT_140018900	nuclear transport factor 2, putative	13.134	22.6853	18.8661	17.6413	19.4706	19.1229	19.3656	12.8919	20.7518	17.8202	18.5275	21.7123							3	3	3	26.4	26.4	26.4	14.438	0	3.1681	121690000	4	0	53957000	3822600	1635500	5403900	1851400	5812100	0	3022800	4567300	14126000	27488000	15211000	0.0634137	0.91956	0.516485	0.182394	0.0521782	0.937903
PfIT_070011400	conserved Plasmodium protein, unknown function	17.5328	19.8545	18.1284	19.0074	19.2657	18.7599	21.8196	17.3986	16.9028	19.0433	18.8324	19.9769							17	17	17	10.6	10.6	10.6	195.16	0	24.473	598020000	38	12515000	62565000	18912000	34782000	244290000	35657000	41600000	11403000	30807000	29298000	8087100	68105000	9060900	0.287085	0.700768	0.505809	0.711056	0.0401023	0.94802
PfIT_020016600	conserved Plasmodium protein, unknown function	15.4849	22.156	15.4411	17.6869	18.5602	18.2875	20.0936	16.1286	17.026	17.5176	17.7249	18.1408							15	15	15	11	11	11	215.46	0	33.027	508090000	28	3026600	308430000	2936200	13926000	73847000	12384000	25510000	4728700	14297000	21117000	8808200	19075000	7698400	0.0757974	0.904707	0.484203	0.215594	0.00718549	0.990912
PfIT_130043500	60S ribosomal protein L6-2, putative	22.0024	22.8645	21.5131	23.1627	22.757	21.9111	25.3941	21.7998	22.2708	23.472	21.9004	22.9198							5	5	5	38	38	38	25.532	0	74.535	1115400000	35	42013000	76364000	29929000	93899000	440960000	116350000	70883000	36509000	39146000	39436000	50602000	79349000	111540000	0.375325	0.624853	0.483596	0.894989	0.358466	0.711244
PfIT_110010200	translocon component PTEX88	17.3057	20.736	17.2733	18.8337	18.849	19.0373	17.4831	18.1944	15.2862	18.699	18.7184	16.321							6	6	6	8.4	8.4	8.4	90.828	0	11.654	210260000	9	6804600	73348000	6653300	19622000	7694500	17873000	19833000	12598000	18116000	22597000	1678200	3438500	5006100	0.151908	0.82846	0.468346	0.407004	0.429375	0.693021
PfIT_120029400	polyadenylate-binding protein, putative	23.5199	24.7141	22.9642	23.9	24.5384	24.1628	26.3165	23.6797	23.8632	24.3598	23.87	24.9047							36	36	36	45.1	45.1	45.1	97.213	0	323.31	9473400000	220	396940000	908260000	270030000	516580000	2757800000	710440000	804120000	443420000	505970000	619810000	503550000	1036500000	287070000	0.354707	0.639572	0.467704	0.852712	0.373841	0.703266
PfIT_140038500	voltage-dependent anion-selective channel protein, putative	17.963	20.0519	17.9041	18.5844	20.3671	18.3575	18.0108	19.7764	17.9227	19.2346	18.9372	18.6097							3	3	3	10.4	10.4	10.4	33.266	0	3.1785	118770000	5	4598900	19566000	4415100	7075200	4754000	11104000	24342000	16164000	9035400	6045700	4472400	7200300	6598500	0.186233	0.809785	0.463369	0.487711	0.025117	0.969627
PfIT_040006200	Plasmodium exported protein (PHISTb), unknown function	21.7966	25.3846	22.6026	22.8896	25.185	23.0938	24.3489	23.3042	22.6936	22.8201	23.7724	24.2669							30	30	30	37.1	37.1	37.1	61.202	0	206.29	5106100000	157	98355000	1182700000	171960000	209800000	576920000	199950000	1029900000	279650000	386880000	241720000	183160000	545020000	189110000	0.129247	0.846669	0.461547	0.352005	0.0543923	0.935573
PfIT_100015800	PRE-binding protein	20.1545	21.443	19.7844	21.5976	20.0209	21.1338	24.0212	19.8046	21.3251	21.7409	19.9216	22.8032							33	33	33	31.5	31.5	31.5	130.16	0	133.34	2499100000	109	66526000	162500000	51472000	180880000	970430000	199780000	60640000	52199000	56607000	131150000	149750000	417170000	43844000	0.265761	0.722189	0.456795	0.665229	0.399251	0.70092
PfIT_140014500	plasmepsin II	19.4793	20.6847	21.1418	19.7552	21.332	21.5888	23.2816	20.3619	21.1135	20.4365	21.3757	22.3885							7	7	7	19.9	19.9	19.9	51.46	0	71.027	766750000	43	16079000	37079000	50901000	19468000	224340000	31220000	58075000	29644000	59859000	69388000	49913000	120790000	34852000	0.237123	0.757657	0.456739	0.602611	0.4995	0.708723
PfIT_070023800	60S ribosomal protein L11a, putative	23.9547	27.0838	25.5025	25.0288	26.8637	26.0065	26.8373	26.3549	25.4417	25.5966	26.1098	26.3764							5	5	5	28.9	28.9	28.9	20.227	0	25.67	6239500000	30	113810000	995670000	332740000	239630000	839270000	355170000	854860000	600790000	506910000	471880000	319010000	609810000	891360000	0.162509	0.826625	0.452702	0.432244	0.283552	0.736168
PfIT_020016300	asparagine--tRNA ligase	12.0366	18.0899	13.7043	17.0139	12.4743	15.6868	19.7863	15.8853	16.3388	17.7248	16.4501	17.1999							3	3	3	6.1	6.1	6.1	70.497	0.0014025	2.8075	57084000	4	0	8091000	0	3837800	26222000	6282100	0	1755300	2596500	1529600	2403700	4366000	1968400	0.0695346	0.912147	0.448043	0.198888	0.552498	0.743915
PfIT_040009400	dipeptidyl aminopeptidase 3	13.0006	14.2803	11.1024	11.9942	12.9556	14.7771	17.281	14.3898	15.8576	16.2527	11.476	16.0047							2	2	2	2.4	2.4	2.4	107.34	0.0080183	1.6686	19365000	2	0	0	0	0	7485100	3669800	0	1009000	0	1319600	2790700	3090300	412010	0.133924	0.843492	0.44786	0.363481	1.15187	0.88383
PfIT_130034800	conserved Plasmodium protein, unknown function	17.8408	18.1296	15.4853	17.9154	17.4064	17.4761	19.2673	14.8992	13.0387	16.6991	15.9608	16.3513							6	6	6	3.5	3.5	3.5	218.8	0	6.2859	152890000	7	17136000	20936000	3348500	18047000	46064000	7766900	12681000	2230600	4656000	13310000	614260	6103200	2094400	0.202432	0.801594	0.44743	0.524846	0.281424	0.732772
PfIT_140014600	plasmepsin II	19.0194	21.9325	20.5668	20.1899	20.9464	21.6744	24.5667	19.4775	22.1646	19.3724	21.8255	24.8114							8	8	8	22.5	22.5	22.5	51.489	0	68.809	1612100000	54	11159000	84055000	32617000	25118000	521820000	14252000	42435000	15330000	78047000	70288000	98722000	618290000	76768000	0.172627	0.816225	0.430679	0.456066	0.389099	0.701704
PfIT_130017000	M1-family alanyl aminopeptidase	16.5732	17.7671	15.5713	16.4253	18.0624	16.6902	18.3254	15.9677	14.4105	16.8187	16.7969	14.2137							4	4	4	4.4	4.4	4.4	126.06	0	5.253	100490000	9	6630200	15168000	3310900	5984600	22335000	7860300	18614000	4357800	7742400	7190500	0	1292000	1477700	0.200095	0.8024	0.422129	0.519524	0.111975	0.872623
PfIT_050033300	AP-1 complex subunit beta, putative	14.9641	17.0811	14.051	16.0852	16.5366	14.714	19.8335	15.0366	16.3746	17.3055	16.5931	17.1576							5	5	5	6.6	6.6	6.6	106.15	0	7.0947	86980000	7	1534200	6655000	814700	3337100	44846000	7774900	4562900	1613300	4745400	0	4078300	7017400	1812100	0.146062	0.83261	0.413207	0.392956	0.435713	0.69111
PfIT_140014400	plasmepsin IV	20.5354	22.6999	22.543	20.108	23.3454	23.5563	24.0424	22.4012	22.9843	22.4249	21.5686	23.1324							9	9	9	27.2	27.2	27.2	51.046	0	323.31	1664700000	48	28874000	129450000	116120000	21472000	328290000	106980000	202500000	105240000	59093000	234370000	157660000	174700000	87618000	0.113157	0.868875	0.410482	0.312003	0.649808	0.829533
PfIT_140074200	rab GTPase activator, putative	14.3306	15.1146	11.7387	13.6903	14.9597	13.7565	17.3225	14.0217	13.0938	15.4462	14.4381	15.6805							2	2	2	1.4	1.4	1.4	197.14	0.00125	2.1224	32647000	2	0	2873700	0	1070700	13277000	3616200	2581100	1347200	1798000	1121000	708140	4253800	403050	0.136739	0.841662	0.407507	0.370355	0.264137	0.747741
PfIT_110022800	box C/D snoRNP rRNA 2-O-methylation factor, putative	16.0863	16.873	15.5575	17.4983	16.0073	16.1841	19.9425	13.0282	16.2976	18.4055	15.9875	16.969							3	3	3	5.2	5.2	5.2	69.389	0	3.383	56989000	6	1809000	3120900	1253800	4813700	26196000	9028000	1712600	0	1689300	1935900	2094300	3335500	2191900	0.256487	0.734692	0.390931	0.645093	0.0419586	0.948513
PfIT_100041000	ADP/ATP transporter on adenylate translocase	12.9747	19.27	15.7636	14.4764	17.8956	16.8031	17.7352	16.1559	15.9176	16.3298	16.7169	16.2181							2	2	2	7.3	7.3	7.3	33.712	0.001328	2.5347	33309000	6	0	12644000	1112600	0	4363600	1647400	4876900	1460300	2154400	2287100	1237900	1524700	1665400	0.0650536	0.918037	0.388922	0.18683	0.114135	0.870461
PfIT_050030300	acyl-CoA synthetase	19.5777	21.2088	19.9179	20.6799	20.7424	20.4277	24.5226	19.7634	20.5413	21.9747	20.7064	22.0599							19	19	19	30.2	30.2	30.2	76.952	0	92.22	1418700000	58	24257000	75134000	30707000	52078000	747180000	127770000	54380000	27589000	53040000	43721000	47305000	135530000	45764000	0.307643	0.675965	0.381883	0.754669	0.369735	0.702418
PfIT_090007900	ras-related protein RAB7	19.5688	21.2899	19.017	19.8368	20.9426	20.2041	21.295	20.7695	20.7634	19.866	20.7007	21.5279							4	4	4	23.3	23.3	23.3	23.788	0	7.7678	238270000	11	9331800	30766000	6366000	11237000	30874000	11467000	24184000	21449000	20452000	14495000	21360000	36285000	19856000	0.186063	0.808421	0.369269	0.487319	0.626706	0.776681
PfIT_090023500	nucleosome assembly protein	17.0013	20.362	18.1992	19.3467	18.9459	18.3702	21.5	18.4702	19.3285	20.2279	18.9788	21.3534							5	5	5	20.1	20.1	20.1	31.826	0	7.8557	175520000	12	1967900	20214000	4514200	10000000	44488000	18420000	7574700	5447200	7749600	5082600	9875500	40190000	11702000	0.131849	0.845657	0.366782	0.358398	0.394268	0.700514
PfIT_140017000	rhoptry-associated protein 1	18.1367	22.3203	17.6934	19.2118	20.7591	19.2766	21.6531	19.5145	18.3398	20.6389	19.9392	20.2788							12	12	12	20.8	20.8	20.8	90.023	0	20.926	698760000	42	11816000	214720000	8690500	24895000	135210000	66947000	72758000	30707000	41217000	26039000	13603000	52158000	17043000	0.0830281	0.902769	0.365667	0.234675	0.0913421	0.893266
PfIT_100026500	serine/arginine-rich splicing factor 4	18.6614	19.815	18.8619	19.5158	19.2896	19.6203	22.7258	18.6547	19.8385	20.306	18.3622	21.6981							6	6	6	12.3	12.3	12.3	62.116	0	9.7066	415970000	21	9950400	22137000	11434000	17991000	166470000	31111000	15380000	9904300	8086800	19342000	22500000	81654000	17332000	0.418481	0.598131	0.362501	0.982405	0.440422	0.689545
PfIT_080016200	CCR4-associated factor 1	18.3104	21.6211	17.462	19.0748	19.4325	19.9647	20.503	19.1219	19.1079	18.9181	18.5938	20.6819							15	15	15	10.4	10.4	10.4	199.91	0	103.66	694940000	35	20155000	199980000	11194000	34235000	92135000	30711000	43868000	35372000	24529000	63437000	35032000	104300000	11209000	0.0995856	0.878784	0.359441	0.277586	0.120578	0.868547
PfIT_100012800	nucleolar protein 5, putative	15.8103	17.2168	17.1532	18.3947	16.0288	16.8047	21.3184	11.73	16.0128	18.842	16.6985	18.3607							8	8	8	19.6	19.6	19.6	53.409	0	11.207	116360000	11	1494000	3960500	3789900	8960600	67989000	12217000	1738300	0	2765100	2976400	1719100	8751600	4475500	0.156896	0.82515	0.349287	0.418917	0.0453629	0.945117
PfIT_140050700	1-acyl-sn-glycerol-3-phosphate acyltransferase, putative	19.3294	21.5115	12.1783	19.0568	20.6714	14.3376	20.3276	19.6306	13.7573	20.0645	18.7068	19.7883							1	1	1	3.4	3.4	3.4	33.747	0.0046784	1.7646	104210000	4	6587600	29896000	0	5453400	13159000	10965000	16700000	8117300	4278800	0	0	9054800	10421000	0.0347074	0.955162	0.348891	0.102634	0.0221026	0.971884
PfIT_130008600	sodium/hydrogen exchanger, Na+, H+ antiporter	13.1403	15.5197	13.2046	15.4778	15.0033	12.3984	17.1228	11.7467	14.0032	14.5767	13.3868	15.951							1	1	1	0.5	0.5	0.5	225.96	0.0047506	1.8332	21624000	3	758420	3946100	793000	0	11989000	0	2758900	0	0	0	1379300	0	257430	0.0980295	0.878575	0.338291	0.273597	0.0672191	0.915422
PfIT_020016900	conserved Plasmodium membrane protein, unknown function	12.8064	15.5122	12.5428	14.8549	13.5486	13.4219	16.6898	13.2809	14.0739	14.81	13.2945	12.0042							4	4	4	1.1	1.1	1.1	490.86	0	3.7268	50367000	7	0	9534000	0	6045000	21566000	5859900	2444300	2030300	2049700	0	0	837990	246900	0.110352	0.871318	0.321311	0.304941	0.309065	0.705034
PfIT_050011400	60S ribosomal subunit protein L24-2, putative	18.1419	19.6199	17.8506	18.6567	19.2189	18.698	20.3543	19.0155	17.6841	18.796	13.8676	15.3535							2	2	2	10.8	10.8	10.8	24.871	0.0077864	1.5761	42529000	2	2313900	6445700	1890900	3306100	10724000	3641300	4881600	4239500	0	3402100	1684700	0	5316200	0.215971	0.786968	0.3204	0.555467	0.195106	0.807406
PfIT_080015500	RNA helicase, putative	20.479	22.3895	21.4477	21.1469	22.4167	21.6996	23.4941	21.198	20.8379	21.3372	21.8761	22.2856							22	22	22	26.2	26.2	26.2	108.34	0	62.53	2393600000	91	71616000	269220000	140150000	113780000	578910000	129820000	274350000	117880000	188610000	166890000	91841000	250510000	48849000	0.181305	0.809015	0.31569	0.4763	0.15123	0.84891
PfIT_140075100	splicing factor U2AF large subunit, putative	15.3189	15.9485	14.3847	15.8573	14.9489	15.7692	18.7841	14.0339	15.1194	15.5565	15.0574	16.3663							2	2	2	2.6	2.6	2.6	97.355	0.0013966	2.8027	34888000	2	1512300	2339800	791450	2196400	16703000	1783100	1170200	620610	1261600	2066300	1317000	3125800	942910	0.223105	0.780267	0.307752	0.571459	0.19393	0.805142
PfIT_140063700	conserved Plasmodium protein, unknown function	16.095	17.6964	12.78	17.1361	13.8258	16.4784	19.3133	13.295	16.8124	17.9158	15.4809	18.1258							2	2	2	3.3	3.3	3.3	76	0	11.319	52775000	4	1959800	5947200	196930	4033000	18240000	6923900	406570	0	1280500	2556600	3222500	8008600	1884800	0.0566572	0.92363	0.289642	0.163988	0.156849	0.841346
PfIT_090039600	cAMP-dependent protein kinase catalytic subunit	17.4813	16.3674	16.2864	18.1179	15.1555	17.7217	20.4506	13.0316	17.8937	18.6767	16.0854	17.5887							2	2	2	7.3	7.3	7.3	40.196	0.0080092	1.6669	64205000	2	3659700	1690800	1598600	5689100	28660000	8380700	0	0	1390600	4323200	4870500	3942400	3210300	0.102537	0.875875	0.286654	0.285126	0.0651741	0.91647
PfIT_090021300	RNA-binding protein musashi, putative	21.2493	22.7313	21.2325	22.4675	21.7694	21.8137	25.3589	21.8144	22.1113	23.1915	22.6694	23.1551							18	18	18	47.7	47.7	47.7	45.176	0	102.65	2240100000	86	54840000	153190000	54203000	127590000	946690000	210750000	78640000	81139000	146750000	81094000	99678000	205500000	101820000	0.196631	0.801442	0.279184	0.511612	0.475044	0.703827
PfIT_050024600	40S ribosomal protein S24	25.7474	26.2247	25.9927	26.1994	26.3307	26.2513	27.0096	26.0756	26.2429	26.1762	26.274	25.832							8	8	8	41.4	41.4	41.4	15.391	0	25.23	5668700000	36	337970000	470510000	400610000	462350000	810650000	454950000	506380000	424310000	486860000	479260000	476470000	358380000	944790000	0.887088	0.386168	0.272214	1.90365	0.643532	0.818488
PfIT_140014700	plasmepsin III	14.9911	21.1057	18.0714	17.1474	17.8231	19.9386	22.4849	19.4275	21.3677	19.5516	19.1332	22.2875							8	8	8	19.5	19.5	19.5	51.792	0	30.671	511100000	20	0	58672000	7161700	3774500	152620000	19980000	6029300	18333000	14949000	26127000	70353000	133100000	19658000	0.0430744	0.941044	0.246964	0.126315	0.700057	0.90946
PfIT_070018300	histone H2B variant	22.5569	24.2413	23.3294	22.4183	24.6418	23.8007	24.721	24.104	22.5687	23.691	23.6994	23.9843							5	5	5	25.2	25.2	25.2	13.763	0	7.2807	1250200000	38	43192000	138830000	73778000	39236000	193590000	94800000	183240000	126220000	95357000	102290000	43548000	116170000	178610000	0.108999	0.870273	0.244424	0.301527	0.202468	0.801469
PfIT_060023200	cell division cycle protein 48 homologue, putative	17.4247	17.3271	15.8403	18.9077	16.062	16.3418	20.778	15.0767	18.6864	19.4897	17.1457	18.8069							9	9	9	14.4	14.4	14.4	92.386	0	62.022	236460000	20	8972700	8385800	2992000	25082000	91701000	37545000	3489000	1762400	7394800	4235800	21514000	23388000	4636500	0.0814148	0.899635	0.239794	0.230436	0.308044	0.700946
PfIT_030023000	DNA-directed RNA polymerase II subunit RPB1	12.6749	15.0713	10.8551	12.3629	12.6021	14.2642	16.9421	14.1701	15.0314	13.4666	13.1177	15.1435							4	4	4	1.6	1.6	1.6	280.97	0	5.578	34652000	4	804350	4234600	0	647890	15488000	1392400	0	0	1093300	2420300	4119200	4452000	281730	0.0530107	0.927474	0.209305	0.153964	0.789327	0.974431
PfIT_110041000	casein kinase 1	20.2901	22.5658	20.3805	21.4422	21.1152	21.3008	23.7847	20.7054	21.1129	21.9858	20.6448	22.7418							14	14	14	40.1	40.1	40.1	37.788	0	43.569	860310000	67	23078000	111750000	24570000	51289000	260120000	74755000	40887000	30777000	29511000	46499000	40823000	126250000	47795000	0.0991201	0.878317	0.207287	0.276394	0.257423	0.752222
PfIT_130062200	serine/threonine protein kinase, putative	10.9267	14.4955	12.4097	12.4124	13.9741	12.0651	18.3293	13.2795	13.8206	15.6275	13.5299	14.232							11	11	11	3.2	3.2	3.2	475.61	0	96.089	109100000	11	445740	5289300	0	1248400	75425000	11593000	3685400	0	2708700	981280	3313300	4406500	476400	0.0601759	0.921937	0.206587	0.1736	0.593927	0.760251
PfIT_140039700	chromatin assembly factor 1 P55 subunit, putative	16.3563	17.6192	13.1477	16.7095	13.2979	17.6911	15.3759	16.1366	18.6922	16.7978	13.3577	19.8921							1	1	1	2.1	2.1	2.1	50.227	0.0079455	1.6415	40123000	4	1510100	3623900	0	1929100	765380	2050700	0	1296800	0	3809100	7624200	17514000	2229100	0.0344396	0.954697	0.191767	0.101869	0.24335	0.767587
PfIT_050016600	RNA pseudouridylate synthase, putative	14.0614	14.9651	12.5372	13.4009	14.659	14.0475	16.4263	13.0542	12.701	13.8239	13.3838	13.0231							6	6	6	0.6	0.6	0.6	1183.1	0	6.7473	110040000	7	0	15417000	2865000	5213400	42449000	6989300	12470000	4099600	5151900	8161300	3209500	4012200	228290	0.0803537	0.899696	0.181238	0.227643	0.0511994	0.938339
PfIT_110046800	60S ribosomal protein L35ae, putative	24.2625	25.0868	24.3163	24.6749	24.6809	24.8203	26.0154	24.6432	23.5886	24.7523	24.2554	25.5374							6	6	6	21.4	21.4	21.4	16.265	0	11.663	2181500000	42	120750000	213820000	125340000	160700000	406980000	169560000	161380000	157210000	120160000	177750000	75692000	292190000	363590000	0.249187	0.74834	0.170165	0.629149	0.0919953	0.893158
PfIT_110033500	spermidine synthase	16.4216	20.9692	18.761	17.6615	19.5475	19.3439	21.0099	18.9287	19.7258	19.6402	18.1514	20.8279							3	3	3	11.2	11.2	11.2	36.596	0	5.5828	170740000	19	1404500	32845000	7108200	3317100	33786000	13074000	12260000	7984100	4658300	10647000	13873000	29781000	10671000	0.0312257	0.956193	0.133677	0.0926667	0.333887	0.707665
PfIT_050026100	S-adenosyl-L-homocysteine hydrolase	17.5016	20.2333	17.2978	18.0528	18.3095	19.0647	21.6809	17.7505	19.9339	20.0319	17.3009	21.3154							6	6	6	14	14	14	53.838	0	9.897	223030000	16	3711400	24653000	3222500	5438400	67241000	21441000	6497500	4410300	3229400	10967000	20031000	52191000	11152000	0.0452043	0.940491	0.131476	0.132284	0.415456	0.694313
PfIT_010006700	nucleoside transporter 4	17.4762	19.4154	16.3126	17.0272	19.103	17.4028	18.9041	17.99	13.7533	17.414	17.092	18.5258							1	1	1	2.5	2.5	2.5	50.024	0.004635	1.7335	49133000	5	2735000	10488000	1220900	2003600	7358700	2619500	8446200	3904900	2095400	2599300	0	5661300	3275600	0.0334235	0.954475	0.109615	0.0989661	0.177127	0.823784
PfIT_140072400	protein phosphatase containing kelch-like domains	22.9416	24.7552	22.4308	23.3902	24.4843	22.5601	23.4957	23.4381	22.0893	23.4791	23.8193	22.5574							6	6	6	7.3	7.3	7.3	100.77	0	4.7532	6005900000	12	338340000	1189400000	237470000	461750000	496770000	491110000	985750000	477340000	621670000	259730000	187410000	259240000	143000000	0.0386587	0.947558	0.102342	0.113864	0.164692	0.833521
PfIT_130015900	RNA-binding protein, putative	19.3256	23.5792	18.9079	19.8159	22.0547	20.2316	23.4483	19.2376	19.0249	23.0052	19.748	20.9847							4	4	4	32.9	32.9	32.9	16.526	0	11.405	264990000	19	3942300	75199000	2951100	5537800	68678000	50514000	26138000	3708900	5283200	7387500	3200600	12450000	44165000	0.0195504	0.96669	0.0965061	0.0587332	0.00536237	0.993233
PfIT_130069400	6-cysteine protein	13.4701	17.7884	16.0675	15.0197	15.9951	16.5947	16.2522	17.0748	16.2673	15.9096	15.3151	15.8893							2	2	2	2.3	2.3	2.3	95.21	0.0095137	1.4156	40874000	5	0	9734400	2953000	1428400	3356400	2647000	2808500	5936100	1753000	4255700	3391700	2609900	950560	0.0236413	0.967763	0.0945034	0.0707148	0.230892	0.776522
PfIT_100011800	transcription factor with AP2 domain(s)	16.8324	18.8485	16.8863	18.8127	18.6947	15.3074	20.0332	17.9899	16.5824	18.2196	18.3155	17.0001							7	7	7	4	4	4	186.47	0	11.721	168480000	17	5134900	20769000	5330300	20259000	47214000	13430000	18669000	11454000	14354000	1784200	4317600	5767600	3829200	0.0207229	0.967045	0.0825033	0.0621777	0.220445	0.784187
PfIT_140076400	conserved Plasmodium protein, unknown function	17.2732	19.4414	17.0709	16.6689	19.8406	17.5051	17.0088	16.6997	19.4615	16.8445	18.6728	17.4821							2	2	2	1	1	1	295	0.0014144	2.8412	489500000	12	19800000	88993000	17209000	13024000	16483000	14710000	117360000	13305000	52238000	23252000	90243000	22885000	3916000	0.0209523	0.968434	0.0763683	0.0628506	0.0615395	0.922854
PfIT_140044300	HSP40, subfamily A, putative	20.3497	22.0976	20.0292	20.4734	20.3318	21.8924	23.9267	21.2619	21.9295	21.2072	20.2292	23.308							15	15	15	44.8	44.8	44.8	48.469	0	112.09	951010000	60	25389000	85268000	20329000	27660000	302980000	46000000	25074000	47777000	23354000	73965000	75893000	197320000	50053000	0.0305165	0.956643	0.073705	0.090628	0.685574	0.908986
PfIT_090030400	conserved Plasmodium protein, unknown function	13.8366	21.5541	20.0965	13.442	21.1977	20.963	22.5229	19.2394	20.7689	19.6567	20.1164	21.4722							4	4	4	23.5	23.5	23.5	24.698	0	10.362	219540000	11	0	30792000	11211000	0	60265000	8265400	24052000	6189200	11367000	20440000	17868000	29093000	21954000	0.00362119	0.993308	0.0384986	0.0110715	0.387947	0.699399
PfIT_140069200	glyceraldehyde-3-phosphate dehydrogenase	22.5735	25.4565	23.027	22.8972	24.1495	24.1244	25.8805	23.478	25.3637	24.3342	23.3588	25.7371							18	18	18	61.7	61.7	61.7	36.635	0	323.31	6820300000	140	137320000	1013000000	188030000	171850000	1359100000	465300000	409410000	257060000	236660000	402350000	949820000	1230500000	310010000	0.0127498	0.977471	0.0380408	0.0385862	0.456163	0.69821
PfIT_090022500	heat shock protein 70	22.5312	25.2248	22.1715	22.6303	23.9292	23.3707	24.0871	23.3529	23.9358	23.3456	23.3429	25.0721							31	31	31	48.8	48.8	48.8	72.387	0	109.18	5533900000	182	181840000	1176300000	141720000	194770000	534640000	319760000	479230000	321380000	319180000	325380000	481400000	1058200000	184460000	0.000277605	0.998902	0.000881195	0.000852006	0.186386	0.817117
PfIT_140041200	mitochondrial acidic protein MAM33, putative	18.0565	20.2536	18.0519	19.5108	19.1899	17.58	19.7632	18.9103	17.7289	18.9773	19.4876	20.1518							2	2	2	7.5	7.5	7.5	28.872	0.004662	1.7512	88216000	3	3271500	15001000	3260900	8964200	10678000	6193100	7176500	5912100	8821100	2351200	2606700	13979000	7351300	0.00944368	0.982184	-0.0271269	-0.0286851	0.00467708	0.990633
PfIT_100012700	tubulin beta chain	17.1563	19.8803	17.0785	18.2702	17.0621	18.6161	22.245	19.7669	20.6108	19.6177	19.7939	21.5141							8	8	7	22.7	22.7	20.9	49.75	0	24.587	285530000	26	2921400	19302000	2768000	6322600	99412000	16089000	2736700	17842000	18180000	8035900	32026000	59897000	14277000	0.0178485	0.969048	-0.055582	-0.0537185	1.13619	0.876816
PfIT_050028200	multidrug resistance protein 1	20.555	23.5937	20.311	21.1108	21.6059	21.5256	23.5138	20.9126	20.9412	21.9038	20.4033	22.0822							32	32	32	26.3	26.3	26.3	161.96	0	205.14	2981500000	155	92428000	759550000	78046000	135870000	718650000	235420000	191500000	118430000	83211000	181130000	120800000	266400000	49691000	0.0226706	0.968006	-0.072429	-0.067881	0.0782191	0.90237
PfIT_040023000	regulator of chromosome condensation, putative	17.8705	17.5389	17.2603	17.3964	17.5145	17.5054	15.6804	17.6917	17.653	17.3792	17.5021	17.9609							2	2	2	1.3	1.3	1.3	236.6	0.001233	2.0621	219230000	3	23724000	18852000	15542000	17079000	5199000	16876000	18536000	20958000	18379000	18420000	20404000	25258000	2214400	0.177873	0.811819	-0.084486	-0.468318	0.328253	0.709492
PfIT_080026000	conserved Plasmodium protein, unknown function	17.0003	17.7532	15.2994	16.6269	17.2225	15.8846	18.8615	16.8556	16.5828	17.4552	16.0651	17.8644							1	1	1	2.7	2.7	2.7	60.542	0.005767	1.7037	45286000	4	3146500	5302100	967760	2428800	11431000	4312600	3670400	2846200	1645500	1451900	2355800	5726900	1886900	0.0441153	0.940575	-0.106296	-0.129235	0.297623	0.712508
PfIT_050007000	rhoptry-associated protein 2	18.4455	23.7147	18.4108	19.4781	20.9668	19.7606	21.628	19.9327	19.7396	20.9925	19.9699	21.0068							12	12	12	33.9	33.9	33.9	46.795	0	30.076	569570000	19	7139800	275350000	6970000	14606000	64817000	41727000	40990000	20016000	20538000	17765000	17508000	42141000	28478000	0.0223407	0.966901	-0.121813	-0.0669165	0.0445969	0.945472
PfIT_140057500	elongation factor 2	20.232	22.6832	21.8255	21.6812	21.1456	21.5172	23.976	20.9411	23.0031	22.4937	21.3632	23.4387							24	24	24	35.1	35.1	35.1	93.522	0	85.327	2959400000	121	54185000	296330000	163520000	147960000	726000000	259860000	102080000	88587000	118690000	132060000	369890000	500280000	67260000	0.0624567	0.91972	-0.132228	-0.1798	0.389475	0.702714
PfIT_130068000	conserved Plasmodium protein, unknown function	14.6448	15.8838	14.9459	14.5299	14.4034	16.1247	17.5436	16.3031	14.8043	14.146	14.3929	17.8778							4	4	4	2.1	2.1	2.1	245	0	5.0908	73390000	9	2305500	5441800	2840700	2129000	17195000	1631600	1950300	7277200	1936200	6430600	2575000	21678000	815450	0.0729129	0.90694	-0.138852	-0.207921	0.533057	0.714419
PfIT_110040400	3-oxo-5-alpha-steroid 4-dehydrogenase, putative	17.5505	20.3322	14.8124	17.3074	17.9401	17.0236	14.9681	16.7853	16.8576	17.5118	17.7879	18.6954							3	3	3	9.1	9.1	9.1	35.467	0.0014124	2.8401	50515000	9	3071600	21122000	460370	2595200	0	2990300	4023900	1807300	3620900	2131600	1900000	6792000	3157200	0.0294138	0.957676	-0.14135	-0.0874525	0.327602	0.708559
PfIT_030019900	eukaryotic translation initiation factor 4E	20.2997	21.5311	19.8662	20.1693	20.4872	20.6092	21.7725	20.1879	20.1728	20.5154	20.3067	21.5275							6	6	6	26	26	26	26.947	0	6.1285	276940000	15	16779000	39395000	12424000	15329000	46571000	19485000	19108000	15528000	16861000	20794000	15366000	39299000	21303000	0.100099	0.879502	-0.143803	-0.278901	0.0698057	0.913214
PfIT_090040500	cytoadherence linked asexual protein 9	17.3626	20.7401	17.5983	17.8799	18.6327	18.7169	21.1417	16.445	19.99	18.9225	18.065	20.6074							7	7	7	4.8	4.8	4.8	160.33	0	14.002	603640000	27	11291000	117340000	13295000	16161000	155010000	33290000	27231000	5977300	18373000	28868000	69770000	107030000	9009600	0.048053	0.936118	-0.157159	-0.140231	0.12862	0.861142
PfIT_100041200	dynamin-like protein	13.8774	17.6442	12.4927	14.8356	13.7349	14.9601	20.2354	14.4181	13.5638	18.2182	14.7514	16.3357							6	6	6	9.4	9.4	9.4	81.525	0	7.9153	74707000	7	0	7989100	0	1140300	48141000	11893000	0	0	1075700	1243100	0	3225500	1915600	0.0343322	0.953327	-0.161249	-0.101563	0.208553	0.79739
PfIT_110030000	small nuclear ribonucleoprotein Sm D1, putative	18.8265	19.9902	18.9883	19.2566	19.1209	18.9425	20.86	12.5502	19.4784	18.9839	15.2837	20.013							2	2	2	25.4	25.4	25.4	14.337	0	3.5607	47621000	2	2789300	6249200	3120200	3758100	11419000	3110800	3420600	0	0	3022700	4382600	6348500	7936900	0.16197	0.825711	-0.16168	-0.430969	0.250114	0.760507
PfIT_060012900	ornithine aminotransferase	21.0219	22.3489	20.8248	21.7249	20.2692	21.6933	24.8173	19.8971	23.7453	23.1465	20.7245	24.2266							17	17	17	41.8	41.8	41.8	46.055	0	117.36	2132100000	90	48971000	122860000	42719000	79720000	679970000	213560000	29064000	22457000	39849000	77993000	323430000	451520000	92701000	0.0888568	0.890969	-0.169397	-0.249902	0.380792	0.701989
PfIT_110022000	GTP-binding nuclear protein RAN/TC4	23.9113	26.2423	24.3729	24.231	24.849	24.9133	26.3884	24.5286	25.9265	24.8435	24.6572	26.793							18	18	18	63.6	63.6	63.6	24.875	0	118.04	8205900000	158	236660000	1190700000	325890000	295350000	1317600000	451580000	453300000	363010000	396880000	473970000	956620000	1744200000	547060000	0.0845144	0.901608	-0.177759	-0.23857	0.354666	0.712852
PfIT_100025000	ADP-ribosylation factor	19.6621	23.4339	20.1918	18.8801	22.6697	21.13	22.4735	21.7323	23.1824	21.2866	21.5546	24.0032							5	5	5	35.4	35.4	35.4	20.912	0	10.767	704960000	36	9125900	124650000	13175000	5307200	64058000	28138000	73393000	38323000	33882000	25244000	104710000	184950000	64087000	0.0428482	0.939889	-0.202679	-0.125679	0.473658	0.700911
PfIT_130011000	conserved Plasmodium protein, unknown function	14.145	15.205	13.4843	13.6431	14.1309	14.4297	17.2962	14.9182	13.8338	14.6138	12.9728	16.9024							1	1	1	2.7	2.7	2.7	57.924	0.0077348	1.5519	12788000	1	561610	1170900	355270	0	4989000	777220	0	0	0	684110	452650	3797400	412520	0.141301	0.836964	-0.210217	-0.381446	0.397856	0.701547
PfIT_060012800	T-complex protein 1 subunit zeta	17.0794	19.8588	18.8777	18.0433	17.0376	20.0889	20.5977	16.6559	19.9506	19.7752	19.1391	20.4024							6	6	6	13.4	13.4	13.4	61.533	0	7.6087	259640000	21	4154600	28524000	14450000	8104300	47603000	26918000	4035900	3097900	17321000	33456000	30399000	41578000	8654700	0.0616984	0.919302	-0.215367	-0.177741	0.114543	0.870664
PfIT_030025900	conserved Plasmodium protein, unknown function	14.7755	15.7894	14.3138	14.9654	14.7175	14.5409	16.6636	15.0583	14.8963	14.3482	11.9398	14.9301							3	3	3	1.8	1.8	1.8	223.09	0.0013459	2.5943	35931000	2	2467900	4984000	1792100	2815200	9135000	1835400	2370800	3002500	0	2097600	2683500	2747200	408310	0.183777	0.809615	-0.218294	-0.482031	0.335728	0.708202
PfIT_090030600	protein kinase, putative	17.3965	14.6114	16.8336	17.4027	16.9515	13.8307	15.051	12.9461	16.8054	16.7942	12.5313	13.898							2	2	2	0.7	0.7	0.7	362.91	0.0012121	1.9727	115840000	4	22429000	3254000	15183000	22526000	4413100	14775000	16476000	0	0	1894100	14889000	0	891070	0.0535163	0.928666	-0.218834	-0.155358	0.407284	0.697258
PfIT_020014500	ATP-dependent RNA helicase UAP56	19.7569	22.2358	20.2862	21.5317	19.529	20.5567	24.1531	17.3026	21.3102	22.2399	20.2006	22.0822							11	11	11	33.9	33.9	33.9	52.223	0	40.778	933450000	31	18606000	103720000	26852000	63668000	391760000	104010000	15887000	3394900	25305000	32391000	54604000	93247000	44450000	0.0820495	0.900583	-0.22049	-0.232105	0.0255815	0.969955
PfIT_110039400	coatomer subunit delta	19.5538	21.1875	20.3529	19.604	20.1469	20.633	20.7213	20.3511	21.8511	19.8082	20.4365	23.097							11	11	11	23	23	23	56.839	0	26.637	655980000	37	19241000	59704000	33479000	19922000	43220000	22950000	29026000	33437000	35479000	40652000	94573000	224300000	26239000	0.159342	0.826129	-0.236778	-0.424736	0.394636	0.701841
PfIT_110041300	DnaJ protein, putative	17.6025	18.6417	17.279	16.2782	19.1339	17.3857	18.976	13.3131	18.639	18.1033	17.4264	20.3001							4	4	4	14.4	14.4	14.4	44.553	0	7.6841	102370000	8	4776200	9815500	3816900	1907400	12375000	6758300	13806000	0	4227600	4110000	9797400	30984000	4265600	0.0930398	0.883966	-0.241796	-0.260747	0.174407	0.827769
PfIT_140067000	inner membrane complex sub-compartment protein 3	12.9537	19.9809	17.022	16.8606	13.723	18.6406	22.507	18.1058	19.2139	21.0536	20.0628	20.0166							5	5	5	40.5	40.5	40.5	17.117	0	22.563	102080000	16	0	8278000	1064700	0	47685000	17413000	0	2256800	8761800	3269300	4864500	8485500	12760000	0.0330611	0.95351	-0.244151	-0.0979294	0.607458	0.783612
PfIT_100023500	60S ribosomal protein L30e, putative	20.8679	23.0199	20.6064	20.851	22.0854	20.7967	23.4699	21.5418	21.0321	20.9589	20.616	22.9501							3	3	3	44.4	44.4	44.4	11.775	0	5.3988	243710000	22	9568500	42526000	7981800	9457000	58090000	10191000	22250000	15265000	8035700	9107700	10722000	40517000	48742000	0.104718	0.874268	-0.253704	-0.290679	0.18491	0.818503
PfIT_040010100	pre-mRNA-processing-splicing factor 8, putative	14.6765	14.1092	13.2451	14.0257	13.4863	13.7232	17.7131	14.5788	12.7136	15.1855	13.5293	14.1867							5	5	5	1.6	1.6	1.6	369.67	0	60.26	53980000	8	3770700	2544700	0	2401800	30942000	5365800	1652600	0	1702500	1947400	967250	2685200	374860	0.234365	0.76022	-0.265129	-0.596509	0.260454	0.749867
PfIT_130029000	glideosome associated protein with multiple membrane spans 1	18.7428	20.1162	17.9594	18.0437	19.2557	18.7216	19.1979	19.5384	20.0482	18.667	18.7396	21.2435							1	1	1	5.3	5.3	5.3	33.979	0.0079636	1.6457	71538000	13	3509500	9091900	2039000	2161700	4810900	3329700	5007600	6091800	3501800	3458200	8673700	19862000	8942200	0.135971	0.840961	-0.265787	-0.36848	0.411346	0.693356
PfIT_110024400	phosphoglycerate mutase, putative	16.9893	19.3445	17.8373	16.6914	18.3544	18.308	19.9692	13.7479	19.4265	18.9165	16.3111	19.6869							2	2	2	8.8	8.8	8.8	28.77	0	3.3987	84091000	12	2211800	11316000	3981000	1799100	17449000	8411500	5697100	0	1382200	5517000	11979000	14348000	4946600	0.112277	0.869415	-0.272416	-0.30979	0.0561801	0.932763
PfIT_140047600	60S ribosomal protein L1, putative	18.9982	20.6892	19.5861	18.2562	20.8564	19.2752	21.337	20.4731	19.1554	19.5671	19.9207	19.9837							3	3	3	16.1	16.1	16.1	24.805	0	3.496	133420000	10	5236400	16907000	7870300	3130800	26490000	7767800	18984000	14555000	9924900	6344800	5839100	10368000	13342000	0.118937	0.859647	-0.295242	-0.32647	0.282213	0.733055
PfIT_130048300	phosphoethanolamine N-methyltransferase	22.4273	23.9245	22.2157	22.5757	22.2804	22.7731	25.2756	22.1456	24.6082	23.4997	21.7882	26.0223							14	14	14	63.2	63.2	63.2	31.031	0	180.52	2791800000	92	78961000	222910000	68191000	87516000	568660000	166050000	71318000	64956000	50702000	100350000	358040000	954160000	199420000	0.218894	0.782253	-0.312793	-0.56203	0.455044	0.69706
PfIT_090022600	glideosome-associated protein 50	19.2952	23.3653	19.1191	18.9586	21.3884	20.445	20.9442	21.139	21.163	21.4762	21.5466	21.8998							10	10	10	31.1	31.1	31.1	44.604	0	39.909	665380000	26	12867000	216130000	11388000	10189000	40353000	58344000	54902000	46185000	61265000	28548000	46959000	78255000	33269000	0.0742435	0.906413	-0.329231	-0.211464	0.12925	0.86153
PfIT_030023600	triosephosphate isomerase, putative	23.6242	21.1016	21.846	22.6221	21.6609	21.2729	21.8876	23.2048	22.2286	20.904	21.8366	21.987							1	1	1	6.4	6.4	6.4	41.578	0.001224	2.0232	1132000000	4	245660000	42752000	71623000	122660000	73716000	37281000	62998000	183700000	71159000	48143000	93372000	78979000	59581000	0.148502	0.832087	-0.338619	-0.398832	0.106485	0.879852
PfIT_140054100	conserved Plasmodium protein, unknown function	17.0378	19.0576	16.1665	16.2071	19.0279	16.0035	19.3368	12.6211	14.317	17.9893	16.298	17.7346							3	3	3	9.4	9.4	9.4	40.695	0	2.8898	54074000	6	2825500	11459000	1544600	0	13905000	5464200	11225000	0	1692100	1379600	0	4580100	2575000	0.0938108	0.884775	-0.341126	-0.262739	0.3832	0.703106
PfIT_060030600	pyruvate kinase	17.3839	21.2464	14.7005	17.9033	18.5214	15.8594	21.0639	17.0997	18.7691	19.6855	18.5203	20.4907							7	7	7	19	19	19	55.66	0	21.792	247470000	23	4788700	69654000	745510	6864100	61381000	23610000	10536000	3932700	10527000	1664600	12509000	41257000	8838200	0.0585256	0.923689	-0.348867	-0.169099	0.209451	0.797718
PfIT_120051400	actin I	24.8893	26.0221	23.5658	24.5623	24.3569	24.4452	26.4407	24.2381	24.9768	24.9904	24.4046	25.9709							22	22	20	66	66	58.8	41.87	0	195.59	9810900000	189	683700000	1499200000	273180000	545040000	2003900000	733330000	472690000	435320000	488600000	502550000	726430000	1446900000	445950000	0.200648	0.802554	-0.370946	-0.520784	0.152685	0.848106
PfIT_090011300	zinc finger protein, putative	17.8809	23.2085	19.2973	19.384	19.4988	20.3873	21.1007	18.8026	17.6062	19.0463	19.3004	16.2613							11	11	11	14.6	14.6	14.6	96.679	0	51.714	438650000	23	6034200	242330000	16107000	17104000	56217000	13534000	18521000	11431000	16141000	34287000	4988200	1963700	17546000	0.0809235	0.899507	-0.372222	-0.229143	0.194279	0.805467
PfIT_120036100	ras-related protein Rab-2	20.3962	23.1986	20.0554	19.8443	21.6859	20.9657	22.6881	20.6241	21.12	21.1903	21.0457	22.4952							11	11	11	60.1	60.1	60.1	24.423	0	37.77	593720000	54	20700000	144400000	16344000	14119000	101360000	35894000	50605000	24241000	32470000	30718000	34185000	88681000	39581000	0.124495	0.853726	-0.384787	-0.340277	0.0782126	0.900841
PfIT_090009300	ubiquitin specific protease, putative	13.3705	13.2749	13.6991	12.8444	12.6435	13.6805	17.0068	14.6339	13.6451	13.1998	14.0152	14.5136							2	2	2	1.5	1.5	1.5	206.22	0.0086674	1.511	18857000	2	0	892050	0	0	11852000	0	0	2288200	1490200	1181600	1153000	0	209520	0.500015	0.540816	-0.392042	-1.14458	0.752478	0.878065
PfIT_010009600	calcium-transporting ATPase	16.6711	18.8685	16.2529	16.9412	17.2283	16.4092	18.8786	17.5668	16.5924	17.6129	15.9387	18.2895							4	4	4	3.3	3.3	3.3	139.4	0	4.4039	119300000	7	5217300	23931000	3904600	6291800	24098000	10022000	7677700	9707400	3140400	4351500	4940500	16020000	2386000	0.182132	0.808896	-0.404548	-0.478218	0.147481	0.853199
PfIT_140016000	conserved Plasmodium membrane protein, unknown function	19.1016	22.7809	18.7141	18.0007	20.9741	20.3789	20.6799	20.6735	21.0698	20.8856	20.2949	22.0783							7	7	7	29.8	29.8	29.8	30.538	0	39.786	276000000	26	6188200	79274000	4730600	2885100	18479000	21311000	22659000	18397000	14150000	14998000	24212000	48711000	25090000	0.0934509	0.884219	-0.414309	-0.261809	0.177504	0.824534
PfIT_110020700	guanine nucleotide-exchange factor SEC12	16.3363	18.4892	16.4256	16.4058	17.1022	16.4996	17.1916	16.9619	17.9512	17.1048	16.4613	19.068							1	1	1	2.5	2.5	2.5	56.516	0	3.6282	60772000	6	2316700	10303000	2464600	2431100	4191200	3946700	3939200	3574500	2526400	2594400	7096000	15388000	2170400	0.219315	0.783879	-0.414519	-0.562973	0.137578	0.858829
PfIT_070025600	conserved Plasmodium protein, unknown function	12.6196	21.0138	19.538	14.6739	17.7321	19.4852	20.1382	13.8769	21.5398	16.653	16.9561	23.0726							5	5	5	29.4	29.4	29.4	24.806	0	10.45	170850000	18	0	21173000	7612700	0	11540000	1030500	2177200	0	1271400	7338700	30487000	88217000	17085000	0.0497411	0.932585	-0.426743	-0.144921	0.0801266	0.902903
PfIT_080031700	receptor for activated c kinase	21.0385	24.0201	22.8173	21.2681	22.2653	22.9597	24.0805	21.6354	24.0899	22.5897	22.1486	25.1334							10	10	10	42.4	42.4	42.4	35.686	0	108.07	1804600000	51	30154000	238170000	103470000	35357000	248350000	88372000	70576000	45608000	65091000	114210000	249980000	515260000	128900000	0.175578	0.814855	-0.460887	-0.462966	0.209322	0.796113
PfIT_140051200	fructose-bisphosphate aldolase	14.1215	20.4954	12.6111	13.5489	18.6032	13.6117	16.2897	17.1292	15.7585	14.4629	17.0384	15.3798							4	4	4	13.8	13.8	13.8	40.105	0	6.3108	45799000	6	0	29565000	0	0	1602200	0	7964600	2867000	2692300	0	1108700	0	2290000	0.0574017	0.923233	-0.48804	-0.166026	0.0948234	0.89033
PfIT_090026700	S-adenosylmethionine synthetase	22.7583	26.1755	23.3901	23.0817	23.3367	24.4136	25.6562	22.6859	26.104	24.1088	23.2168	26.6374							23	23	23	56	56	56	44.843	0	176.87	7593800000	163	134800000	1440000000	208870000	168670000	1004700000	343750000	201290000	128200000	185230000	424600000	1370300000	1983400000	399670000	0.166427	0.822331	-0.497253	-0.4415	0.179178	0.823806
PfIT_070013300	heat shock protein 90	21.7969	23.3442	22.2018	22.0708	21.3707	22.3288	24.6111	21.2725	23.0352	23.8489	22.086	23.7151							22	22	22	36.4	36.4	36.4	86.165	0	94.45	3860300000	155	138450000	404640000	183320000	167400000	973770000	574140000	103040000	96259000	169170000	200180000	326630000	523310000	101590000	0.408658	0.599027	-0.524222	-0.962623	0.187662	0.816407
PfIT_140047800	FACT complex subunit SSRP1, putative	17.2348	20.5718	18.7665	17.4949	18.3778	19.1035	19.5613	18.5497	19.7951	18.8299	18.576	20.4193							5	5	5	11.5	11.5	11.5	58.786	0	4.735	242350000	12	4935700	49877000	14270000	5910800	24756000	14911000	10900000	12279000	12505000	18025000	29112000	44870000	7573500	0.190335	0.804185	-0.53231	-0.497168	0.160844	0.836167
PfIT_110034700	60S ribosomal protein P0	18.8421	21.5803	19.6453	19.3867	19.8035	19.2667	22.4811	18.5069	20.3357	21.7233	19.3063	21.3874							7	7	7	27.2	27.2	27.2	34.967	0	51.042	358030000	29	7988900	53306000	13940000	11652000	99524000	58857000	15556000	6332500	11021000	10723000	22496000	46634000	21061000	0.257763	0.732534	-0.536936	-0.647869	0.107435	0.881406
PfIT_110013200	endoplasmic reticulum-resident calcium binding protein	14.7016	17.8448	13.9479	13.4317	16.3806	15.0594	16.3023	15.9289	16.4331	14.9677	12.73	19.8128							2	2	2	7	7	7	39.404	0.0013316	2.5379	31990000	3	0	4943600	331860	0	1697100	0	1791700	1310100	0	717060	1858200	19341000	1523300	0.136091	0.841659	-0.5409	-0.368774	0.236545	0.775456
PfIT_020020200	DNA-directed RNA polymerase II subunit RPB2, putative	16.8959	15.8295	13.1011	14.2678	17.0342	12.8389	17.3829	17.6687	17.5633	16.0048	16.9315	19.2556							7	7	7	6.6	6.6	6.6	151.72	0	6.4677	113530000	9	8048900	3843200	579910	0	11280000	4339800	8858300	13752000	8249200	483530	12783000	41309000	1720100	0.122842	0.853742	-0.561861	-0.336181	0.933675	0.986278
PfIT_050006200	mature parasite-infected erythrocyte surface antigen	23.628	24.6708	23.5377	23.5001	24.5804	22.0191	23.7829	24.2405	21.5725	21.9567	22.9453	24.2993							46	46	46	40.1	40.1	40.1	202.11	0	159.22	10446000000	190	829690000	1709400000	779350000	759330000	923720000	260500000	1605600000	1268500000	516880000	272010000	199600000	1321300000	163220000	0.282081	0.707668	-0.578965	-0.700358	0.343471	0.706898
PfIT_020011200	conserved Plasmodium protein, unknown function	14.3569	16.1498	14.5998	15.7715	14.9835	12.5742	14.9268	12.8978	13.9533	14.9483	14.7563	13.5474							2	2	2	1.4	1.4	1.4	167.03	0.0096567	1.4877	13004000	2	1300900	4507900	1539500	0	1931100	0	2008600	0	1715900	0	0	0	209740	0.205566	0.797399	-0.592431	-0.531968	0.613755	0.773087
PfIT_140043600	ribonucleoside-diphosphate reductase, large subunit, putative	12.6185	17.5647	13.7208	14.6591	15.8981	11.5445	18.502	14.9383	18.5143	12.7436	13.8996	19.1945							5	5	5	7.2	7.2	7.2	96.903	0	5.9807	71297000	9	0	8724300	607560	0	16705000	0	0	1412900	0	0	16848000	26998000	1584400	0.109683	0.871881	-0.600778	-0.303254	0.631637	0.791454
PfIT_130052800	DNA/RNA-binding protein Alba 4	23.2207	25.2592	23.5874	23.0018	23.7201	23.5081	23.7859	23.0395	23.7192	23.8293	23.4307	23.8412							11	11	11	34.4	34.4	34.4	42.159	0	39.818	2622300000	81	146630000	602380000	189060000	125980000	216940000	223570000	207280000	129320000	169610000	178950000	207150000	225420000	174820000	0.389737	0.615441	-0.612448	-0.924332	0.308406	0.703873
PfIT_120011200	high mobility group protein B3, putative	20.5978	21.4389	19.3289	19.9909	19.5407	19.9669	20.6687	19.9056	20.1438	19.542	19.4307	21.2567							15	15	15	7.7	7.7	7.7	265.18	0	48.597	1334600000	32	134890000	241650000	55975000	88572000	141690000	64885000	64826000	83484000	60066000	87106000	98472000	212980000	15701000	0.420837	0.597118	-0.622363	-0.987141	0.120474	0.867684
PfIT_130049000	kelch protein K13	18.7119	21.0936	18.2971	18.8355	18.7659	18.6198	20.8276	18.7973	19.2437	19.8567	19.284	19.6647							7	7	7	10.2	10.2	10.2	83.892	0	12.107	328500000	30	14599000	76081000	10951000	15905000	63271000	32282000	15156000	15490000	21704000	13697000	21106000	28258000	9661700	0.290251	0.698402	-0.627088	-0.717808	0.0847965	0.897997
PfIT_100037300	haloacid dehalogenase-like hydrolase	12.4434	21.6512	16.4627	16.8598	15.136	16.6669	21.6399	14.2082	18.1374	19.6487	19.2599	21.0875							4	4	4	19.4	19.4	19.4	32.814	0	58.699	162610000	14	0	49403000	1354800	1783900	49018000	12329000	0	0	9416800	1560700	4325100	33424000	10841000	0.0820661	0.902112	-0.631536	-0.232148	0.121933	0.867741
PfIT_130016700	26S protease regulatory subunit 7, putative	13.046	16.5347	11.9217	12.825	13.0888	13.6774	17.9657	14.1466	16.2208	14.7432	14.504	17.2081							3	2	2	7.9	5	5	46.822	0.0046729	1.7592	18777000	2	0	2753200	0	0	7423400	795310	0	525930	673790	0	2214900	4390900	647500	0.170624	0.816627	-0.637069	-0.451371	0.570843	0.737262
PfIT_090025300	inosine-5-monophosphate dehydrogenase	18.3044	21.6992	18.8174	18.2633	18.6121	19.8148	20.5108	18.4006	20.9769	19.7835	18.9356	21.6276							4	4	4	9	9	9	56.164	0	15.57	359400000	17	8093300	85123000	11549000	7865500	37352000	22562000	10017000	8651300	12535000	23056000	51595000	80999000	14376000	0.242407	0.754623	-0.710287	-0.614264	0.0963809	0.889882
PfIT_110010300	tRNA-splicing ligase RtcB, putative	13.749	18.4547	15.4106	13.0475	16.0693	16.3349	19.0022	13.4989	18.9477	17.4611	15.8268	19.2315							3	3	3	6.1	6.1	6.1	56.32	0	3.2913	60976000	6	0	8981500	1088900	0	13127000	4510800	1719000	0	1453000	2066500	12640000	15389000	2439100	0.155457	0.826355	-0.720838	-0.415488	0.217493	0.79
PfIT_090019000	conserved Plasmodium protein, unknown function	14.8048	19.9272	14.7469	20.0266	14.3326	12.9134	24.0463	17.2748	16.4553	20.9043	17.5975	18.7702							9	9	9	45.4	45.4	45.4	28.412	0	26.124	311830000	12	0	13957000	384930	14954000	242540000	27476000	0	2220000	2776600	0	1258000	6259400	22273000	0.0948818	0.884955	-0.735437	-0.265502	0.395409	0.702396
PfIT_070021100	eukaryotic translation initiation factor 3 subunit I, putative	21.5788	23.3576	22.0174	20.7513	21.1235	22.8327	22.6812	21.2877	22.2879	22.2364	20.8944	23.1505							11	11	11	37	37	37	37.284	0	24.124	1144800000	47	59516000	204200000	80659000	33536000	127780000	93883000	43407000	48641000	37033000	141930000	97292000	176910000	60253000	0.376267	0.624247	-0.748753	-0.896912	0.12568	0.863203
PfIT_140075000	eukaryotic initiation factor 4A	22.2148	25.141	22.7811	22.0998	22.5476	23.1642	24.63	22.1474	24.042	23.4142	22.1168	24.8348							17	17	17	44.7	44.7	44.7	45.31	0	53.602	3577900000	138	107090000	813990000	158570000	98880000	571200000	245920000	134880000	102200000	100050000	206800000	380000000	658330000	162630000	0.337876	0.645205	-0.775119	-0.817913	0.0680033	0.915313
PfIT_130030200	L-lactate dehydrogenase	20.0493	22.5403	17.7315	19.0272	18.9962	19.9697	22.4682	19.9106	20.9557	21.4291	20.008	22.0154							5	5	5	20.9	20.9	20.9	34.107	0	15.965	317100000	16	13020000	73198000	2611600	6410900	69629000	33883000	6275100	11827000	12652000	12322000	24405000	50870000	26425000	0.211171	0.791793	-0.776	-0.544652	0.253218	0.75707
PfIT_130043600	elongation factor 1-gamma, putative	20.8382	22.7539	22.521	20.9487	20.6511	22.0647	23.7212	21.0459	23.4187	22.3104	20.5162	24.7848							19	19	19	46.7	46.7	46.7	47.777	0	58.318	1802500000	102	39367000	148530000	126390000	42502000	290420000	109230000	34580000	45465000	31495000	92123000	235470000	606980000	85836000	0.478023	0.55257	-0.816159	-1.10114	0.265618	0.749143
PfIT_060016900	nucleolar GTP-binding protein 1, putative	15.5209	16.6737	15.6202	13.0308	16.3434	15.9471	18.6402	12.307	15.0379	16.7526	16.0641	15.9262							2	2	2	3.4	3.4	3.4	79.519	0	4.3458	34045000	4	1551500	3449900	1662100	0	13483000	3643900	2743900	0	2260900	2084800	1110100	2054800	1031700	0.305615	0.677267	-0.831166	-0.75039	0.118757	0.868909
PfIT_090017800	elongation factor 1-beta	18.0289	19.5587	17.1749	19.2141	14.3218	18.7214	21.7249	13.2867	19.2451	20.3429	17.499	20.0575							4	4	4	13.5	13.5	13.5	31.911	0	4.8958	115990000	6	3476700	10039000	1923500	7906300	45061000	17289000	0	0	2408100	5619000	8077800	14185000	8921900	0.187206	0.810623	-0.835065	-0.489958	0.0216409	0.9708
PfIT_130006200	Plasmodium exported protein (hyp12), unknown function	12.2109	14.5578	16.2201	14.2808	14.5108	11.6618	23.3077	17.9858	18.063	18.3585	12.2599	14.0764							4	4	4	11.5	11.5	11.5	46.025	0	8.4697	147270000	6	0	0	992390	0	134970000	4369100	0	3374500	0	0	3560100	0	11328000	0.223085	0.778941	-0.845125	-0.571413	1.21466	0.8903
PfIT_120016800	heat shock protein DNAJ homologue Pfj4	25.076	26.3909	24.627	23.8265	24.7915	24.9359	25.6936	24.9952	25.2231	24.4088	24.4417	26.5594							14	14	14	42.6	42.6	42.6	28.062	0	54.74	3968900000	73	282960000	703950000	207280000	119010000	434140000	178180000	232320000	267550000	182290000	256770000	313320000	791170000	496120000	0.597962	0.483922	-0.846668	-1.33641	0.0361948	0.951003
PfIT_010006400	aspartate--tRNA ligase	16.0001	18.4182	17.5053	16.5711	16.1224	16.4745	19.8237	15.6674	18.6849	17.933	18.4969	18.3146							2	2	2	3.7	3.7	3.7	73.449	0	4.869	121950000	12	2490600	13311000	7069700	3699900	35263000	9509200	2710900	1977600	14057000	3460100	16014000	12389000	3209300	0.568663	0.508823	-0.918545	-1.27923	0.203095	0.801536
PfIT_060013100	conserved Plasmodium protein, unknown function	18.0712	17.4707	17.5294	18.0065	17.4115	14.8498	21.3208	18.0577	17.2841	17.4167	14.6745	17.8297							16	16	16	2.9	2.9	2.9	724.63	0	15.015	1260200000	22	75459000	49768000	51835000	72153000	717720000	47941000	47765000	74760000	7164700	8090900	43731000	63832000	4599400	0.400784	0.606787	-0.934491	-0.94672	0.405598	0.696034
PfIT_030011000	activator of Hsp90 ATPase	16.1648	18.887	18.3059	15.9986	16.8709	17.6675	18.9642	16.9852	19.9304	17.2631	17.0513	20.5037							2	2	2	5.7	5.7	5.7	41.59	0.0012594	2.1893	93919000	8	1469400	9695900	6481300	1309500	10229000	3145700	2397100	2594600	2716300	4163700	19983000	29733000	4696000	0.418137	0.59538	-0.940273	-0.981713	0.282566	0.733648
PfIT_060033000	DnaJ protein, putative	16.5909	21.3298	17.4707	15.3528	18.6188	18.5803	17.1214	16.6908	20.0235	19.3111	16.132	20.8615							5	5	5	15	15	15	44.669	0	6.0861	169270000	8	2171600	57986000	3996100	920620	3136800	14310000	8856300	2327500	1579900	8623200	23447000	41915000	7694000	0.201117	0.803512	-0.946463	-0.521853	0.104167	0.879762
PfIT_080007100	mannose-6-phosphate isomerase, putative	18.5292	16.0832	14.7531	15.1673	15.5123	15.7031	17.711	17.2397	15.4386	16.367	15.7371	16.6376							1	1	1	0.9	0.9	0.9	117.52	0.0095541	1.4514	74757000	2	22321000	4096200	1629200	2171000	12659000	4986600	2757500	9130900	3222400	3147400	2620200	6015600	1267100	0.372992	0.624047	-0.994295	-0.890225	0.0933519	0.892812
PfIT_090027000	phosphoglycerate kinase	21.817	24.6045	23.0204	21.2215	22.2705	22.9542	24.1151	21.8049	24.8411	23.032	21.8049	25.2146							24	24	24	60.3	60.3	60.3	45.426	0	75.748	4379400000	112	103450000	714260000	238230000	68462000	508760000	240150000	141660000	102590000	102580000	227540000	841530000	1090200000	156410000	0.451975	0.572579	-0.99858	-1.04942	0.13263	0.859305
PfIT_140046300	vesicle-associated membrane protein, putative	20.6131	21.1495	19.6018	18.7186	19.8744	19.5877	20.9326	17.695	20.7543	19.5345	19.2777	22.305							4	4	4	22.4	22.4	22.4	27.686	0	9.414	279440000	29	25661000	37219000	12731000	6902000	32024000	12151000	15379000	3395100	10169000	12606000	28299000	82908000	17465000	0.863653	0.38968	-1.06127	-1.85696	0.225766	0.781473
PfIT_130069500	conserved Plasmodium protein, unknown function	16.147	19.7288	14.818	16.2588	16.6632	14.521	18.6331	15.9336	16.0517	16.5169	16.1536	17.1835							6	6	6	4.1	4.1	4.1	207.12	0	5.3106	125780000	8	4499100	53871000	1790800	4861600	25206000	5814000	6434200	3880500	4519700	1457700	4211600	9228700	2028600	0.269959	0.721818	-1.0836	-0.674302	0.00481092	0.992013
PfIT_130054500	glutamate--tRNA ligase, putative	15.5625	19.9682	17.1398	16.3276	16.6471	16.4312	20.5395	14.6095	19.8579	18.5462	16.1647	19.162							8	8	8	10.8	10.8	10.8	103.12	0	9.7352	236590000	12	2274500	48206000	6787300	3865400	71631000	17991000	4823500	1174900	3452700	4153100	44660000	27570000	5033800	0.349578	0.64435	-1.08822	-0.842135	0.125389	0.862387
PfIT_140017200	eukaryotic translation initiation factor 2 gamma subunit, putative	19.8079	22.0842	20.8415	19.9637	18.7274	20.6316	22.4354	18.8299	21.57	20.2674	18.8811	22.2135							9	9	9	21.3	21.3	21.3	51.244	0	17.279	576040000	33	20193000	97819000	41336000	22496000	124780000	27766000	9548700	10251000	10622000	35738000	68493000	107000000	26184000	0.588528	0.49209	-1.13695	-1.31801	0.00878753	0.988083
PfIT_090009500	replication protein A1, small	17.6544	20.7707	18.5044	17.9884	15.459	19.6319	20.5488	17.3752	21.3993	19.2116	17.8429	21.9217							7	7	7	15.3	15.3	15.3	56.234	0	25.987	370320000	24	5982600	51882000	10784000	7541400	44484000	17607000	1306200	4930100	6817500	23560000	80212000	115210000	12770000	0.348229	0.643149	-1.28338	-0.839349	0.199833	0.804247
PfIT_110031200	autophagy-related protein 23, putative	17.0222	22.8706	13.4297	16.8908	17.5893	14.8825	23.9521	25.4173	17.963	19.119	19.2599	21.8901							9	9	9	11.3	11.3	11.3	110.13	0	51.555	3204800000	42	5723400	329770000	0	5225500	697840000	24482000	8479400	1926900000	26995000	1298800	10987000	167130000	74530000	0.174391	0.815571	-1.31997	-0.460193	0.582849	0.765585
PfIT_090008400	alpha tubulin 2	18.0538	20.1351	16.3106	16.7824	17.2554	16.459	20.9494	19.9017	19.8392	19.7668	20.425	21.2582							6	6	3	21.2	21.2	10.2	50.296	0	19.475	222910000	13	5714300	24182000	1706900	2367100	42523000	18733000	3285700	20570000	29564000	1891700	19698000	52670000	10615000	0.518713	0.532	-1.33425	-1.18138	0.822257	1
PfIT_040006400	Plasmodium exported protein (PHISTa), unknown function	19.3437	17.2446	17.0187	16.7512	15.6251	17.1362	24.6604	22.2777	21.2857	22.7851	22.0695	23.4548							7	7	7	14	14	14	49.754	0	32.025	995200000	30	11311000	2640000	2257200	1875300	450760000	122870000	859150	86436000	74822000	2448800	43460000	195450000	58541000	0.71901	0.463412	-1.36483	-1.57231	1.76057	0.551556
PfIT_110038600	heat shock protein 70	15.2775	19.5419	14.6055	13.9749	15.9863	15.2993	18.8371	11.6572	18.4149	17.9056	15.7835	19.2328							4	4	4	7.8	7.8	7.8	73.193	0	4.9606	93416000	5	1390100	26715000	872520	0	16391000	8593800	2272100	0	1974100	1411300	12232000	21563000	2669000	0.348059	0.64168	-1.38817	-0.838999	0.0205106	0.97258
PfIT_060031300	protein DJ-1	19.0695	18.892	18.0148	18.2468	14.2493	19.0312	21.0725	14.6082	19.7815	19.81	16.4147	20.9705							5	5	5	28	28	28	20.292	0	5.4964	91475000	7	6051700	5351400	2913200	3421500	24257000	10111000	0	0	960960	5893300	9913200	22601000	8315900	0.416368	0.595473	-1.483	-0.978156	0.0287771	0.964911
PfIT_050025600	conserved Plasmodium protein, unknown function	20.502	24.3255	22.1551	20.3701	23.1156	19.0052	22.0797	23.4166	20.407	21.0601	22.5333	21.5307							3	3	3	13.3	13.3	13.3	35.659	0	19.814	730990000	16	16335000	231250000	51375000	14907000	48756000	24051000	99971000	123160000	66773000	5787800	15293000	33326000	66453000	0.384398	0.61952	-1.49726	-0.913482	0.0909979	0.892269
PfIT_120054100	26S protease regulatory subunit 8, putative	17.606	18.4823	16.279	15.8552	15.8394	15.4529	19.1302	16.8688	18.5295	17.4401	15.6128	19.2015							4	3	3	11	8.3	8.3	49.545	0	7.3706	73188000	10	5386600	9887600	2147000	1600500	15493000	4801500	1583100	3231300	1353000	1211000	10217000	16278000	2710700	1.2493	0.241284	-1.73995	-2.66112	0.316565	0.705343
PfIT_070026600	GTP-binding protein, putative	16.859	20.2069	17.4928	17.9307	13.4598	17.8999	20.1362	16.8435	20.1541	19.7852	15.3636	21.1453							6	6	6	16.3	16.3	16.3	45.163	0	7.0634	177320000	8	2734000	27836000	4242100	5746500	26504000	20781000	0	2704800	969670	5625400	26836000	53344000	7709700	0.413609	0.599821	-1.7561	-0.972602	0.222581	0.780571
PfIT_080018300	conserved Plasmodium protein, unknown function	18.5199	21.3731	18.9861	17.5635	17.9882	17.853	22.0219	18.6427	18.8248	21.0069	19.5199	21.7687							3	3	3	11.1	11.1	11.1	36.255	0	5.4685	158660000	15	3758800	27161000	5192600	1937100	42585000	21072000	2600100	4092800	7517300	2367500	4643400	35731000	15866000	0.95715	0.352398	-1.82479	-2.04456	0.049555	0.938272
PfIT_030025100	T-complex protein 1 subunit epsilon	15.6698	18.2181	14.9275	15.8833	14.7556	12.2346	18.9084	13.1409	17.1897	17.6858	12.8359	17.5004							3	3	3	7.5	7.5	7.5	59.175	0	4.2863	46517000	5	1668100	9757500	997220	0	15745000	6746800	885150	0	0	0	4783600	5933300	1453700	0.604341	0.481075	-1.98066	-1.34884	0.023859	0.969754
PfIT_020010700	26S proteasome regulatory subunit RPN1, putative	16.0594	18.3094	16.5666	15.5724	12.2889	16.9278	18.8719	15.9816	18.7446	17.4677	14.0907	19.4734							4	4	4	5.9	5.9	5.9	108.36	0	4.5773	136420000	10	3619300	17217000	5144300	2582500	25426000	9606700	0	3429500	924680	6607400	23280000	38579000	2573900	0.596421	0.48311	-2.04876	-1.3334	0.311584	0.705534
PfIT_050028300	mitochondrial processing peptidase alpha subunit, putative	17.0053	22.214	17.6296	15.3199	19.2473	15.7806	17.8801	17.7025	18.534	15.0848	17.7532	19.1969							10	10	10	23.8	23.8	23.8	61.772	0	33.56	211930000	20	3683300	136220000	5677700	0	6754800	973020	17425000	5972400	6185900	1576100	10628000	16826000	7568800	0.453904	0.570037	-2.16701	-1.05326	0.212724	0.794607
PfIT_080020600	eukaryotic translation initiation factor 3 subunit G, putative	18.0772	17.2809	18.3362	17.5809	17.2015	12.1839	20.9498	16.6713	18.9883	17.7558	17.4228	17.9439							2	2	2	7.8	7.8	7.8	31.251	0.0013106	2.4398	52951000	4	3318700	1911000	3971200	2352600	24306000	2655900	1808600	1252500	2108500	0	6240600	3025700	4412600	0.563181	0.513643	-2.24269	-1.26852	0.310723	0.705558
PfIT_060033200	RNA-binding protein, putative	18.0746	21.8101	17.6895	13.8545	19.2072	17.7481	19.6255	13.1912	17.9671	18.6275	17.8953	18.9405							3	3	3	4.2	4.2	4.2	91.239	0	4.9582	158550000	10	6073300	80896000	4650300	0	17795000	8909400	13316000	0	5363300	4843300	5637300	11069000	7206900	0.472405	0.549348	-2.2548	-1.09001	0.41224	0.696136
PfIT_030013400	pre-mRNA-processing factor 19, putative	17.7915	19.6604	16.4881	12.841	13.3557	12.7148	14.6218	14.8369	18.2982	15.2312	12.8434	19.6522							2	2	2	5.6	5.6	5.6	60.753	0	46.131	52755000	5	5218100	19059000	2114100	0	0	0	0	0	0	0	7413900	18951000	2293700	2.22209	0.0665946	-5.00947	-5.32219	0.614668	0.778425
[truncated: 9 more columns]

## Sheet: Triton samples
Majority protein IDs	Gene product	iBAQ PfEMP1_control_1	iBAQ PfEMP1_control_2	iBAQ PfEMP1_control_3	iBAQ PfEMP1_X_1	iBAQ PfEMP1_Y_1	iBAQ PfEMP1_Z_1	iBAQ PfEMP1_X_2	iBAQ PfEMP1_Y_2	iBAQ PfEMP1_Z_2	iBAQ PfEMP1_X_3	iBAQ PfEMP1_Y_3	iBAQ PfEMP1_Z_3	Student's T-test Significant pos1_control	Student's T-test significant	Student's T-test Significant pos2_control	Student's T-test significant_	Student's T-test Significant pos3_control	Student's T-test significant__	Peptides	Razor + unique peptides	Unique peptides	Sequence coverage [%]	Unique + razor sequence coverage [%]	Unique sequence coverage [%]	Mol. weight [kDa]	Q-value	Score	Intensity	MS/MS count	iBAQ	Intensity PfEMP1_control_1	Intensity PfEMP1_control_2	Intensity PfEMP1_control_3	Intensity PfEMP1_X_1	Intensity PfEMP1_X_2	Intensity PfEMP1_X_3	Intensity PfEMP1_Y_1	Intensity PfEMP1_Y_2	Intensity PfEMP1_Y_3	Intensity PfEMP1_Z_1	Intensity PfEMP1_Z_2	Intensity PfEMP1_Z_3	-Log Student's T-test p-value pos1_control	Student's T-test q-value pos1_control	Student's T-test Difference pos1_control	Student's T-test Test statistic pos1_control	-Log Student's T-test p-value pos2_control	Student's T-test q-value pos2_control
PfIT_080005300	stevor	15.3718	19.2145	18.2998	23.4085	26.4401	25.1449	17.304	20.0341	13.9828	16.783	17.4595	18.0932							8	8	8	24	24	24	34.413	0	138.94	1814800000	20	139600000	0	0	4195000	144740000	0	0	1183600000	0	0	482300000	0	0	2.14621	1	7.36913	5.06777	0.088356	1
PfIT_060021400	erythrocyte membrane protein 1, PfEMP1	20.0423	20.1438	20.3248	27.1465	27.6342	27.5084	26.2269	27.4098	25.0056	23.6306	26.0696	25.0931	+	pos1_control					110	110	96	37.8	37.8	34.1	319.58	0	323.31	144160000000	573	961090000	161970000	173770000	196990000	22284000000	11781000000	1948000000	31248000000	26746000000	10564000000	28638000000	5052900000	5368700000	5.76661	0	7.25939	43.2319	3.00707	1
PfIT_100038600;PfIT_140048400	ADP-ribosylation factor, putative	13.7474	21.3873	14.8733	25.9082	25.4256	19.5902	24.6632	17.3805	18.9149	15.5294	21.6693	25.465							2	2	2	15.2	15.2	15.2	20.248	0	14.576	2071100000	5	188290000	0	30172000	0	692690000	292260000	0	495740000	0	36686000	8682000	5436800	509480000	1.04665	1	6.97199	2.22794	0.488586	1
PfIT_110005700;PfIT_080005100	rifin	18.6488	21.2173	19.3074	24.6078	28.4052	26.8771	15.6305	23.0038	20.7905	22.0476	22.3256	17.6536							13	13	12	28.9	28.9	26.5	41.395	0	52.507	10552000000	35	527620000	8220100	48762000	12976000	511360000	0	86698000	7109500000	168220000	105120000	2465300000	36274000	0	2.16582	1	6.90553	5.1326	0.0119376	1
PfIT_100005000;PfIT_090006400;PfIT_000007100	stevor	16.2407	22.6035	17.6646	27.8767	27.2936	18.8134	27.4667	23.7516	23.2181	28.7509	23.2013	27.5683							2	2	2	6.6	6.6	6.6	32.355	0.0099228	1.8215	18022000000	2	1287300000	0	89216000	2908600	3450300000	2596800000	6324500000	2303200000	197730000	135030000	0	136610000	2786200000	0.76448	1	5.82498	1.66126	1.19746	1
PfIT_010017100	Pfmc-2TM Maurers cleft two transmembrane protein	15.5699	17.787	17.7633	20.7342	24.1645	22.6303	14.864	19.6165	14.8384	21.2713	17.3705	16.3399							3	3	2	10.8	10.8	5.6	27.196	0	12.642	206990000	4	29570000	0	0	0	12210000	0	17717000	131620000	0	0	45445000	0	0	1.94216	1	5.46958	4.42971	NaN	1
PfIT_080035200	tryptophan/threonine-rich antigen	15.5393	19.8918	19.7252	23.697	23.0716	23.9405	24.1817	24.5201	22.7438	22.1666	23.5087	23.4748							17	17	17	25.8	25.8	25.8	80.452	0	56.572	5463200000	101	118770000	0	44748000	39868000	625540000	875340000	216550000	405510000	1106700000	549020000	740550000	323100000	536270000	1.63602	1	5.18426	3.58233	1.62807	1
PfIT_020026500	Pfmc-2TM Maurers cleft two transmembrane protein	16.4327	17.9125	17.675	21.8117	23.3406	22.1319	15.001	16.6638	15.8095	15.8322	17.6026	16.41							2	1	0	11.1	5.8	0	26.64	0.0079051	1.9989	170090000	2	18899000	0	0	0	33130000	0	0	95595000	0	0	41364000	0	0	2.83305	1	5.08798	7.78424	NaN	1
PfIT_070029600	conserved Plasmodium protein, unknown function	15.5755	16.579	21.7458	21.872	22.9343	23.341	23.8832	17.7056	19.8427	24.4585	23.1655	23.6167							2	2	2	20.2	20.2	20.2	13	0	16.25	526400000	7	87733000	0	0	21100000	23029000	92832000	138330000	48090000	0	56451000	63747000	5641500	77181000	1.13884	1	4.74901	2.42161	0.404029	1
PfIT_020015500	conserved Plasmodium protein, unknown function	15.3745	17.7468	23.9902	20.9288	23.1759	23.8452	22.858	23.154	21.0701	21.2328	22.3326	23.5333							4	4	4	14.1	14.1	14.1	32.541	0	37.245	575610000	19	82230000	0	0	116650000	13974000	53217000	17251000	66335000	65336000	36973000	105490000	15411000	84979000	0.594613	1	3.61278	1.32988	0.555688	1
PfIT_090040600	ring-exported protein 1	20.9773	22.392	22.9966	25.7339	25.3927	25.8905	25.9656	26.5656	23.1127	21.8189	24.4666	23.524							28	28	28	47.3	47.3	47.3	78.626	0	285.95	12508000000	136	390860000	66061000	176120000	267800000	1785800000	2096900000	118390000	1409600000	3178300000	741850000	1990500000	290240000	386000000	2.34677	1	3.55041	5.76234	1.18998	1
PfIT_140042000	conserved Plasmodium protein, unknown function	18.0051	20.8822	24.3517	24.8189	23.2446	25.2216	25.1689	21.5442	15.8844	19.268	20.3771	21.7799							12	12	12	8.4	8.4	8.4	209.31	0	33.037	14870000000	33	148700000	26308000	193270000	2140900000	2959600000	3772300000	63133000	993870000	305800000	136180000	3912500000	6049100	360080000	0.801426	1	3.34869	1.73385	0.0218495	1
PfIT_020008900	conserved Plasmodium protein, unknown function	15.4687	22.6423	16.0856	19.9926	22.9553	20.9324	20.9013	21.4894	18.0718	19.7145	21.012	21.1429							24	24	24	11	11	11	271.26	0	67.456	3391500000	55	28262000	0	785600000	8345100	125180000	235020000	103240000	975950000	353300000	253760000	240150000	33063000	277860000	0.586589	1	3.2279	1.31423	0.342167	1
PfIT_110040900	signal recognition particle subunit SRP72, putative	15.6447	22.4253	23.0679	24.4061	21.7763	24.562	19.0663	22.2157	18.2549	21.7615	21.5158	22.7051							15	15	15	18.3	18.3	18.3	106.88	0	37.737	3197300000	48	84140000	0	214030000	334120000	844810000	20860000	135100000	136490000	185090000	113940000	941170000	11886000	259840000	0.559003	1	3.20216	1.26035	0.0700687	1
PfIT_130046800	inner membrane complex suture component, putative	15.5053	19.0456	21.3086	20.9748	22.5022	21.8586	21.2349	21.0507	23.6004	15.2375	19.957	23.8706							12	12	12	31.5	31.5	31.5	58.043	0	34.918	1010400000	30	48115000	0	0	54545000	43277000	51827000	0	124750000	45615000	21375000	79854000	267080000	322100000	0.839627	1	3.15866	1.80928	0.824779	1
PfIT_110018500	rhomboid protease ROM1	15.5088	17.4586	20.7774	20.25	21.1248	21.485	15.7141	22.532	22.6468	15.5336	17.2424	22.8432							3	3	3	12.6	12.6	12.6	31.723	0	26.833	312650000	12	28422000	0	0	19771000	13717000	0	0	25154000	66711000	0	32287000	72236000	82769000	0.896143	1	3.03838	1.92175	0.359828	1
PfIT_020009500	hexose transporter	16.6231	16.1762	21.2441	20.3137	20.8713	21.8741	20.8739	21.2279	21.1234	15.1601	18.377	22.1481							4	4	4	8.1	8.1	8.1	56.416	0	11.593	375460000	12	20859000	0	0	44708000	23459000	34589000	0	34527000	44207000	0	69191000	41119000	83658000	0.827651	1	3.00524	1.78559	0.877902	1
PfIT_130020600	conserved Plasmodium protein, unknown function	15.6688	20.6473	20.8999	20.7698	23.3758	21.8556	14.5392	23.1347	22.1004	19.2548	20.9114	22.8452							4	4	4	10.5	10.5	10.5	56.342	0	9.9362	1009800000	12	43906000	0	37773000	45001000	41122000	0	14388000	250340000	211820000	45363000	87281000	103430000	173310000	0.718656	1	2.92841	1.57162	0.0952589	1
PfIT_110030300	kelch protein, putative	19.9143	20.1786	21.4372	22.301	23.3693	24.5132	19.4497	22.9683	19.6498	19.9429	21.9365	22.2386							2	2	2	4.2	4.2	4.2	67.605	0.005872	2.3164	1681600000	12	64676000	25691000	30857000	73827000	134360000	18618000	26206000	281730000	213360000	104360000	622530000	21387000	128670000	1.65747	1	2.88445	3.6379	0.0498583	1
PfIT_030022300	kinesin-5	16.6104	23.7769	23.3049	23.7568	24.6031	23.6745	24.3715	24.7079	20.7365	23.7564	23.5478	22.6648							9	9	9	6.8	6.8	6.8	189.5	0	24.768	13755000000	27	161820000	8504500	1221700000	880840000	1204800000	1844900000	1204500000	2166200000	2329400000	1042400000	1138000000	148500000	565200000	0.524046	1	2.78077	1.19186	0.31639	1
PfIT_110051400	conserved Plasmodium protein, unknown function	17.2785	21.8552	16.4649	20.7288	21.7393	21.4403	20.2232	18.9471	15.6031	19.9138	20.1975	21.8561							9	9	9	7.9	7.9	7.9	158.9	0	19.743	1264200000	15	19753000	10175000	242800000	0	111220000	78335000	63216000	224060000	32346000	76951000	182120000	0	242950000	0.746136	1	2.76996	1.62533	0.0432149	1
PfIT_120033400	NIMA related kinase 1	17.17	16.5199	15.8612	18.035	20.8786	18.8982	12.9913	20.4374	15.5412	17.0183	18.2282	16.2262							3	3	3	3	3	3	124.93	0	3.9221	168300000	4	4104900	0	0	0	11012000	0	0	79042000	58217000	0	20031000	0	0	1.39193	1	2.75358	2.9845	0.0293912	1
PfIT_130065400	conserved Plasmodium protein, unknown function	15.2193	23.7306	22.1277	23.099	22.8527	22.989	16.2203	22.5882	15.5668	16.9572	20.7339	17.0273							2	2	2	10.7	10.7	10.7	21.562	0.0036923	2.7668	462910000	4	51435000	0	125270000	41244000	80862000	0	0	68169000	56749000	15695000	74924000	0	0	0.428924	1	2.62103	1.00337	0.258486	1
PfIT_130049100	conserved Plasmodium protein, unknown function	25.6965	16.5825	23.8608	24.5333	25.4966	23.8269	25.5813	17.9118	15.3672	25.7267	17.8373	17.1942							5	5	5	0.7	0.7	0.7	908.6	0	5.1027	91653000000	7	262620000	18978000000	34250000	5316600000	8473900000	17522000000	19379000000	16522000000	86061000	81732000	5193000000	14751000	52335000	0.383	1	2.57231	0.910637	0.229456	1
PfIT_140047100	adaptor complexes medium subunit family	14.7258	18.3942	20.9213	19.3247	20.5085	21.8615	20.5587	20.673	16.9178	17.2867	18.8183	22.9166							5	5	5	8.6	8.6	8.6	87.151	0	6.0132	680290000	8	20009000	0	11714000	67516000	22324000	52514000	0	50718000	56841000	15716000	129550000	4209500	269190000	0.586249	1	2.55115	1.31356	0.248645	1
PfIT_070034700	Plasmodium exported protein, unknown function	14.6924	20.8902	20.219	19.1692	21.6043	22.6668	21.3799	22.7675	13.2671	22.3918	17.5532	21.7343							5	5	5	26.2	26.2	26.2	31.783	0	21.641	454450000	22	32461000	0	27208000	17087000	8253200	38207000	77040000	44633000	99957000	0	93221000	0	48843000	0.501247	1	2.54617	1.14701	0.0520266	1
PfIT_140063200	V-type H(+)-translocating pyrophosphatase, putative	18.5343	17.2559	22.5786	19.5163	23.3015	23.1125	22.3047	23.1864	23.4278	21.2962	21.3118	22.7242							8	8	8	14.1	14.1	14.1	76.416	0	21.853	1366600000	21	65074000	7972400	3286700	131530000	15748000	108800000	54076000	217100000	200450000	54666000	190440000	236970000	145500000	0.551841	1	2.52051	1.24634	1.00604	1
PfIT_090008400;PfIT_040026800	alpha tubulin 2	16.7012	25.0932	24.8884	24.3131	24.2863	25.6381	23.4735	23.3006	23.6824	20.9587	23.1106	25.1203							10	10	10	34.2	34.2	34.2	50.296	0	94.779	5111100000	56	243380000	0	751660000	652190000	437730000	244590000	42798000	429660000	216970000	190190000	1096700000	282700000	765910000	0.377535	1	2.51824	0.8995	0.17207	1
PfIT_050006700	skeleton-binding protein 1	24.4187	26.1204	26.2422	28.625	27.8364	27.8383	26.9964	28.9896	28.0267	25.8898	26.9853	27.1709							5	5	5	20.1	20.1	20.1	36.613	0	76.893	18838000000	54	2354800000	179410000	583600000	635010000	3311800000	1071000000	497380000	1917200000	4264000000	1062800000	1919900000	2187600000	1208800000	1.75172	1	2.50612	3.88853	1.36763	1
PfIT_140012800	conserved Plasmodium protein, unknown function	18.4313	24.2684	20.5453	26.547	22.6337	21.5612	27.2721	22.8382	19.1634	21.9399	22.6356	21.7089							27	27	27	11.5	11.5	11.5	339.3	0	114.14	37665000000	96	313870000	42418000	2424800000	183630000	11766000000	19450000000	482770000	780940000	899850000	781970000	371330000	70458000	411360000	0.475006	1	2.499	1.09517	0.278698	1
PfIT_100006300	EMP1-trafficking protein	21.1127	22.704	20.8565	24.253	23.3827	24.3213	24.8792	24.5168	22.5283	23.6431	23.3038	22.9682							5	5	5	20.8	20.8	20.8	65.813	0	17.805	5130400000	30	155470000	74826000	225480000	62655000	659770000	1018400000	432300000	360930000	792170000	341730000	691760000	199630000	270790000	1.69001	1	2.42793	3.72322	1.21894	1
PfIT_120038800	sentrin-specific protease 1	13.905	16.0226	19.0343	15.8999	19.2831	21.0074	16.7333	19.1849	15.5719	18.6704	15.8841	19.6068							6	6	6	6.1	6.1	6.1	122.77	0	10.949	271120000	20	4929500	843700	3661400	29531000	3362700	0	0	35088000	32778000	3326100	115940000	2679000	43913000	0.497828	1	2.40949	1.14027	0.174526	1
PfIT_120056400	coronin	15.239	24.038	17.8047	19.9569	20.7965	23.4099	23.0753	22.8238	20.6756	23.1728	20.5835	22.7087							10	10	10	22.4	22.4	22.4	69.014	0	30.699	1950500000	56	67257000	0	499540000	6639800	29512000	256300000	274230000	52814000	215300000	45568000	323190000	48573000	198800000	0.348292	1	2.36049	0.83948	0.509269	1
PfIT_060033500	SET domain protein, putative	16.3078	21.1418	16.3435	21.1456	21.1208	18.4546	15.9211	20.3788	12.2355	17.3748	19.7136	18.6654							25	25	25	4.4	4.4	4.4	795	0	52.82	3300900000	61	10251000	26121000	745050000	26777000	746970000	0	54724000	734260000	439030000	276850000	115680000	1552800	133870000	0.557326	1	2.30926	1.25707	0.242757	1
PfIT_140014100	multifunctional methyltransferase subunit TRM112, putative	15.4968	17.9898	20.9633	19.132	20.5531	21.5957	14.736	17.7826	15.3965	16.7329	18.9898	21.1341							2	2	2	18.4	18.4	18.4	14.234	0.0053349	2.4259	86655000	4	9628300	0	0	18400000	5170600	0	0	13846000	0	0	28524000	0	20714000	0.586059	1	2.27696	1.31319	0.522909	1
PfIT_080037300	rifin	15.1865	23.4302	23.2696	19.7243	24.9193	24.0396	14.62	18.3425	20.9452	17.2417	17.287	22.7943							6	6	6	18.7	18.7	18.7	38.206	0	19.04	966580000	17	80549000	0	135640000	121350000	10394000	0	0	380750000	0	0	206930000	24228000	87289000	0.289896	1	2.26565	0.71705	0.334151	1
PfIT_110052000	conserved Plasmodium protein, unknown function	14.998	22.677	21.7216	20.474	22.593	23.0199	22.1545	23.734	20.3725	16.7602	22.1535	23.438							3	3	3	18.9	18.9	18.9	24.916	0	5.4395	562130000	9	62459000	0	60355000	31123000	13107000	42017000	0	56937000	125560000	41987000	76548000	12217000	102270000	0.366802	1	2.23008	0.877557	0.367355	1
PfIT_100023800	conserved Plasmodium protein, unknown function	14.747	13.9766	16.8715	14.708	18.7825	18.7783	14.7982	17.5792	16.3	16.8837	16.2824	18.6415							2	2	2	8.7	8.7	8.7	127.81	0.0053318	2.4244	128340000	4	2005400	1759800	1031700	7673800	1712900	1823400	7739200	28860000	12532000	5101200	28774000	5163800	26172000	0.621234	1	2.2246	1.38176	0.36305	1
PfIT_130034700	AMP deaminase, putative	14.4027	19.9985	18.5839	19.2838	20.5395	19.8089	18.8169	19.9562	19.0996	18.7652	16.0104	20.5161							6	6	6	9.5	9.5	9.5	81.771	0	9.773	306260000	10	8507200	0	37710000	14145000	22977000	16625000	16040000	54869000	36619000	0	33066000	20224000	53985000	0.573676	1	2.21571	1.28902	0.402547	1
PfIT_030025900	conserved Plasmodium protein, unknown function	16.1873	21.9858	16.62	19.4631	22.0348	19.8294	16.7179	22.0033	14.7497	19.8698	21.3956	18.6717							7	7	7	4.5	4.5	4.5	223.09	0	13.297	1643700000	20	18679000	0	365480000	8863700	63602000	9485200	84313000	378110000	369940000	242770000	81986000	2424300	36746000	0.463682	1	2.17812	1.0727	0.0530976	1
PfIT_100030700	conserved Plasmodium protein, unknown function	13.7274	15.754	16.8706	14.4108	19.2105	19.2478	15.4943	19.8878	15.1141	20.0236	18.7973	19.3171							5	5	5	4.1	4.1	4.1	193.79	0	6.9127	417920000	10	4493800	0	0	11144000	0	0	99130000	56419000	90220000	42368000	57897000	0	60746000	0.514777	1	2.17237	1.17365	0.316404	1
PfIT_110042500	conserved Plasmodium protein, unknown function	16.1291	17.3631	14.3376	15.0028	19.7982	19.2902	16.2454	19.5174	17.4114	16.1295	17.4314	20.0501							10	10	10	4	4	4	336.23	0	23.712	553350000	15	4129500	9604100	22590000	0	0	10410000	9606600	122160000	100560000	23685000	85909000	23359000	145460000	0.52228	1	2.08713	1.18839	0.615763	1
PfIT_040010900	sexual stage-specific protein precursor	14.5144	25.1913	22.6525	20.6325	24.6539	23.3247	21.6046	25.4129	23.3008	16.7503	22.6734	25.3042							4	4	4	38.9	38.9	38.9	16.653	0	63.021	948740000	14	189750000	0	191560000	32966000	8127700	15944000	0	131990000	223360000	33445000	52531000	51665000	207150000	0.239355	1	2.08428	0.607537	0.319497	1
PfIT_010012900	phenylalanine--tRNA ligase alpha subunit	26.5841	19.7874	23.7616	25.6665	25.9655	24.7223	26.5774	20.2241	21.9065	27.438	18.7168	24.1174							3	3	3	5.9	5.9	5.9	67.72	0	4.8177	15890000000	5	567510000	2816900000	25338000	398220000	1491200000	2803800000	5091200000	1834700000	34293000	0	775020000	110070000	509590000	0.443949	1	2.07373	1.03342	0.0601289	1
PfIT_100006200	Plasmodium exported protein (hyp2), unknown function	16.4416	21.9039	20.4439	21.1062	21.5218	22.3585	22.0068	23.3329	20.3296	18.0814	21.342	21.8265							9	9	9	21	21	21	53.113	0	17.847	1077200000	33	38472000	0	109870000	39941000	63206000	117990000	0	84305000	295860000	74430000	150570000	36895000	104130000	0.54562	1	2.0657	1.23416	0.548548	1
PfIT_040028900	serine/threonine protein kinase, FIKK family	14.2017	23.1986	21.919	19.35	22.5066	23.6367	22.4638	23.27	19.381	20.0498	21.039	20.9521							10	10	10	15.3	15.3	15.3	74.503	0	29.693	1873800000	22	55111000	0	327300000	134820000	22720000	196670000	36904000	202600000	343900000	73255000	443410000	23214000	68977000	0.266229	1	2.05802	0.66624	0.251152	1
PfIT_130015700	conserved protein, unknown function	13.5831	17.5563	19.3348	14.8322	20.948	20.8461	19.8908	21.4392	19.3931	20.8224	18.15	22.0692							3	3	3	17.6	17.6	17.6	24.413	0	10.052	183940000	7	15328000	0	0	7934900	0	11666000	22252000	24275000	34122000	0	22620000	8262100	52806000	0.317919	1	2.05068	0.776279	0.879829	1
PfIT_030015200	parasite-infected erythrocyte surface protein	15.4485	20.4505	16.3862	17.7165	21.1401	19.5102	18.6425	18.3705	17.8211	18.7942	19.4155	19.9363							6	6	6	6.2	6.2	6.2	153.93	0	22.47	451940000	12	7928700	0	81675000	4882300	12276000	23325000	25912000	131740000	19318000	39859000	42563000	13199000	57190000	0.482605	1	2.02718	1.11021	0.212093	1
PfIT_130006900	EMP1-trafficking protein	16.9591	22.0162	20.698	21.0758	23.0279	21.6385	22.4091	24.508	20.6853	17.4035	22.4769	22.0107							2	2	2	10.7	10.7	10.7	37.501	0	10.679	611480000	15	61148000	0	42418000	17011000	22103000	55695000	0	85527000	238590000	58374000	32646000	16862000	42255000	0.552318	1	2.02295	1.24727	0.635534	1
PfIT_120040200	CCR4-NOT transcription complex subunit 4, putative	20.9474	23.2173	25.3951	26.5521	22.6244	26.4288	27.5466	22.5141	17.4017	22.7023	22.0083	21.7582							17	17	17	11.6	11.6	11.6	193.42	0	48.785	31816000000	67	467880000	137490000	663130000	3000500000	6691000000	13330000000	464060000	439680000	407310000	286860000	6142700000	11775000	241210000	0.481259	1	2.01521	1.10754	0.076942	1
PfIT_110011700	nucleic acid binding protein, putative	14.6447	19.6995	15.5338	15.5449	20.2377	20.119	16.1117	20.7784	16.1691	19.6028	19.4558	20.2729							5	5	5	11.9	11.9	11.9	69.259	0	14.094	220670000	11	7881100	0	23840000	0	0	0	22294000	34619000	50362000	20134000	31885000	2063200	35474000	0.385197	1	2.00785	0.915108	0.184248	1
PfIT_080008500	filament assembling protein, putative	15.7547	20.2721	20.4681	18.0338	22.453	21.9666	20.6471	23.2286	20.559	16.5047	22.5032	23.0029							9	9	9	16.1	16.1	16.1	86.683	0	27.385	1326300000	30	40191000	0	41786000	47867000	8856000	54188000	0	189470000	324360000	196190000	135240000	50978000	277370000	0.404765	1	1.98614	0.954766	0.679042	1
PfIT_020019200	conserved Plasmodium protein, unknown function	17.4634	20.9251	19.6076	18.2873	22.9803	22.6616	20.5231	23.1962	14.3239	21.597	22.121	22.2291							9	9	9	36.2	36.2	36.2	35.697	0	16.287	793950000	19	41787000	0	37832000	15178000	6078000	28630000	60269000	157220000	182600000	86667000	126060000	0	93405000	0.470914	1	1.97771	1.08706	0.00181878	1
PfIT_060027800	hexokinase	15.9389	22.5435	22.6079	21.3276	22.4419	23.2455	20.4832	22.8575	22.1013	18.219	21.4307	23.1436							10	10	10	29.8	29.8	29.8	55.261	0	35.532	1523800000	46	56438000	0	165060000	172590000	71058000	39573000	0	153840000	205190000	76323000	268510000	121480000	250190000	0.361046	1	1.97492	0.86575	0.247331	1
PfIT_040015600	conserved Plasmodium protein, unknown function	15.6316	19.9823	22.0094	20.8484	20.4942	22.1675	19.164	19.4736	20.5507	16.7093	19.9114	20.5122							12	12	12	9.5	9.5	9.5	180.12	0	18.455	987300000	32	17630000	0	0	236420000	105720000	32895000	0	82711000	40769000	55224000	263790000	86019000	83749000	0.430626	1	1.96227	1.00678	0.0968733	1
PfIT_100018900	conserved Plasmodium protein, unknown function	16.0992	21.8994	19.4691	18.3475	22.8917	21.9931	20.3179	22.1812	21.4257	20.7967	21.7258	22.2222							38	38	38	17.3	17.3	17.3	267.39	0	109.63	5517100000	132	36059000	10741000	598520000	111040000	51033000	199980000	278690000	1190600000	727600000	530640000	638650000	430990000	748580000	0.368417	1	1.9215	0.880865	0.537562	1
PfIT_070013700	heat shock protein 110	14.5535	21.5447	22.0911	19.0701	22.1556	22.6991	20.8394	20.5465	21.9798	21.5438	20.8203	23.0844							14	14	14	22.8	22.8	22.8	99.963	0	63.156	1881600000	46	40905000	0	140720000	205510000	25318000	86304000	140630000	214910000	70449000	85174000	313230000	190260000	409110000	0.288568	1	1.91183	0.71422	0.281821	1
PfIT_130011900	RED-like protein, putative	16.0243	18.7865	20.3221	18.4954	20.6976	21.5417	15.4669	17.8421	20.6343	16.8122	17.7212	21.6301							4	4	4	10	10	10	47.756	0	4.7503	235180000	4	11759000	0	9043500	26217000	7390700	0	0	34011000	0	0	61054000	32551000	64913000	0.530168	1	1.86722	1.20388	0.0711201	1
PfIT_070020400	protein SDA1, putative	14.7842	18.4937	15.8751	17.8536	18.5302	18.3096	15.7162	18.6039	13.4948	14.0521	14.9742	15.7504							2	2	2	2	2	2	123.3	0.0019481	3.3912	38629000	2	858420	0	16610000	2704700	0	0	764370	0	0	1448400	14621000	0	2480600	0.759255	1	1.84681	1.65102	0.0858105	1
PfIT_020023900	ribosome associated membrane protein RAMP4, putative	15.9801	23.6786	15.0268	13.8749	23.654	22.6955	14.935	23.3798	21.2642	23.357	22.8922	23.9095							2	2	2	18.8	18.8	18.8	11.604	0.0037406	2.8755	324560000	5	81139000	0	53709000	0	0	0	42978000	52802000	43661000	31138000	27169000	10075000	63027000	0.168059	1	1.84632	0.445343	0.16449	1
PfIT_130065300	conserved Plasmodium membrane protein, unknown function	14.877	19.2687	16.9741	16.5684	20.1966	19.8115	13.889	19.5748	13.7269	17.7372	19.1654	18.7382							6	6	6	4.2	4.2	4.2	249.9	0	19.515	505410000	8	5004100	0	63794000	13003000	9815500	0	22068000	121380000	78874000	59384000	92935000	0	44165000	0.458405	1	1.81893	1.06222	0.221817	1
PfIT_010013100	conserved Plasmodium protein, unknown function	14.642	25.1188	22.7046	20.6491	24.3519	22.8999	16.2876	24.1908	22.6742	22.8315	23.6014	22.943							2	2	2	13.8	13.8	13.8	19.571	0	7.5388	897740000	7	128250000	0	255040000	47849000	11511000	0	52249000	149880000	134050000	89087000	54784000	46851000	56444000	0.209797	1	1.81183	0.541548	0.0191162	1
PfIT_040027000	pre-mRNA-splicing helicase BRR2, putative	16.7403	26.1727	18.9165	25.6288	21.2866	20.3323	26.2713	26.578	18.1435	27.2623	26.9499	20.5864							17	17	17	8.6	8.6	8.6	333.93	0	39.196	81158000000	33	605660000	14670000	10136000000	66303000	6952400000	10853000000	21571000000	342770000	13424000000	17371000000	176900000	38800000	210970000	0.213493	1	1.80608	0.54989	0.314663	1
PfIT_130038600	transmembrane protein Tmp21 homologue, putative	14.9118	23.0374	23.5246	21.2754	22.5431	23.0379	22.3211	20.9482	23.9937	19.8824	20.7109	23.9544							3	3	3	16.6	16.6	16.6	24.995	0	4.3213	889260000	13	80842000	0	94696000	132730000	27921000	57639000	10632000	67229000	22255000	18879000	94732000	183740000	178800000	0.250171	1	1.79425	0.631301	0.262837	1
PfIT_100006100	Plasmodium exported protein (hyp16), unknown function	16.5562	17.9103	21.3461	20.6752	18.6477	21.8636	21.7196	21.4984	21.6467	20.4704	17.6302	19.0749							2	2	2	7.2	7.2	7.2	32.138	0	3.8876	337620000	8	19860000	0	0	45317000	28464000	58708000	24698000	0	50362000	0	64868000	55814000	9388000	0.451978	1	1.79131	1.04943	0.991457	1
PfIT_130075600	membrane associated histidine-rich protein	26.6901	29.5135	29.1246	29.6464	30.536	30.4589	29.1694	30.2296	27.6749	28.3611	29.5463	29.3508							8	8	8	32	32	32	31.865	0	86.952	73789000000	104	9223600000	866180000	6131000000	4682400000	6722800000	4830100000	2758200000	12455000000	10072000000	6272000000	11807000000	1714100000	5477200000	0.889329	1	1.77109	1.90813	0.19359	1
PfIT_130055400	lysine--tRNA ligase	14.6407	23.1536	22.8038	20.7211	22.0526	23.0938	16.8224	22.2635	23.0757	19.5161	20.7013	23.3641							12	12	12	25.2	25.2	25.2	67.59	0	39.372	1916000000	37	58061000	0	307930000	241630000	57042000	0	0	143550000	166150000	56264000	295430000	291740000	356290000	0.241893	1	1.75642	0.613131	0.05269	1
PfIT_070034800	EMP1-trafficking protein	21.9493	21.6389	24.2139	25.7211	22.2265	25.1216	26.4975	22.4137	20.9513	21.7921	21.283	24.5134							22	22	22	29.9	29.9	29.9	232.08	0	89.536	29183000000	88	255990000	461630000	372270000	2218200000	6305700000	10801000000	413990000	559440000	636960000	290890000	4161600000	231150000	2730000000	0.579545	1	1.75573	1.30048	0.13733	1
PfIT_110011800	conserved Plasmodium protein, unknown function	15.4921	17.2343	14.7801	15.9612	19.04	17.7086	17.3767	20.3042	18.6505	16.8337	16.5803	18.6345							4	4	4	7.7	7.7	7.7	84.211	0	6.6768	143200000	5	3254600	0	6784100	0	2807100	7488100	0	23717000	56968000	0	9424900	18106000	17906000	0.685097	1	1.73444	1.50616	1.23588	1
PfIT_090019600	type II NADH:ubiquinone oxidoreductase	13.2355	20.8598	18.4089	17.5655	20.4038	19.7359	18.848	20.7504	19.1302	18.1671	19.4782	19.9956							2	2	2	4.3	4.3	4.3	61.67	0.0019072	3.0925	277970000	11	9585200	0	55188000	10094000	5625300	13684000	8535800	40232000	51155000	21180000	25321000	16640000	30316000	0.29168	1	1.73366	0.720851	0.374212	1
PfIT_110028200	splicing factor, putative	15.5081	23.4862	23.1686	21.2514	22.7206	23.3826	21.7733	22.8648	19.9449	21.0458	21.0585	23.9706							2	2	2	20	20	20	16.012	0	6.5363	670870000	8	74541000	0	105750000	84854000	22467000	32260000	19483000	62205000	68743000	19656000	98420000	9084100	147950000	0.256457	1	1.73061	0.645027	0.106045	1
PfIT_060020900	mitochondrial import receptor subunit TOM40, putative	14.9377	17.9014	20.7827	18.4081	19.8092	20.5597	18.8244	19.956	21.5409	19.2775	16.2397	20.6425							6	6	6	27.6	27.6	27.6	43.624	0	13.672	262680000	17	11421000	0	0	41490000	8000700	10677000	14616000	21129000	23394000	0	35549000	70173000	37648000	0.404383	1	1.71843	0.953994	0.52779	1
PfIT_010016900	Plasmodium exported protein (hyp8), unknown function	18.0713	21.7699	23.4013	21.1723	22.9013	24.3184	19.2516	21.421	19.7798	18.2531	21.1258	23.3742							5	5	5	18.9	18.9	18.9	28.233	0	17.962	702400000	30	63854000	3029700	39336000	121870000	25995000	6866100	3436600	86175000	30886000	25170000	230130000	9901800	119600000	0.398925	1	1.71651	0.942958	0.2113	1
PfIT_120032200	DNA helicase 60	14.8908	19.6	20.42	18.5528	21.0464	20.4142	19.6377	19.7796	16.3781	19.7648	18.5374	16.7439							5	4	4	7	5.6	5.6	86.554	0	7.5455	410950000	5	9132200	0	35761000	63132000	17304000	36706000	40088000	97458000	40500000	17121000	62880000	0	0	0.380494	1	1.70085	0.905532	0.0493497	1
PfIT_050012700	subtilisin-like protease 1	14.4371	23.8376	21.6383	19.5851	22.6114	22.7833	21.9709	23.6067	20.5776	22.9076	22.4187	23.3556							9	9	9	18.9	18.9	18.9	77.7	0	225.68	2485800000	37	75326000	0	494720000	107720000	25954000	135650000	259650000	211460000	421550000	185020000	238210000	51642000	354190000	0.217412	1	1.68889	0.558705	0.282107	1
PfIT_130030100	dihydrofolate synthase/folylpolyglutamate synthase	14.4193	23.4296	13.9117	15.3839	21.0111	20.4261	19.3463	22.0967	16.5316	22.9848	20.9166	19.7952							4	4	4	11.3	11.3	11.3	60.064	0	6.0035	903680000	5	31161000	0	327640000	0	0	19330000	240710000	61284000	130070000	57399000	40859000	0	26385000	0.179649	1	1.68686	0.472452	0.233474	1
PfIT_060014800	transketolase	14.9111	13.6744	17.1551	14.2317	17.7492	18.8197	13.8969	15.8423	15.1254	15.4321	16.6833	19.211							2	2	2	3.1	3.1	3.1	75.814	0	4.7578	50784000	4	1493600	1047500	444510	4962400	654130	518650	0	0	1997400	3578200	15732000	1215300	20633000	0.41761	1	1.68668	0.980653	0.0890365	1
PfIT_130049500	heat shock protein 110, putative	15.4227	18.1042	19.5143	17.4699	19.1619	21.4498	15.3624	17.3844	19.1323	15.5897	21.122	22.974							17	17	17	20	20	20	108.18	0	32.485	844990000	25	15648000	0	0	40437000	9803200	0	0	31673000	9239100	123240000	154670000	31031000	444890000	0.432001	1	1.68014	1.00953	0.0846786	1
PfIT_130054800	conserved Plasmodium protein, unknown function	15.7797	17.5777	18.9978	19.0952	18.3352	19.9273	20.4702	18.6722	15.8016	16.2107	18.117	18.3633							5	5	5	1.7	1.7	1.7	400.55	0	5.6833	789980000	10	5231600	0	29538000	79045000	84568000	219340000	11452000	49937000	63077000	42927000	150550000	8624200	50919000	0.736147	1	1.66749	1.60579	0.20192	1
PfIT_010013800	chromatin assembly factor 1 protein WD40 domain, putative	15.8532	18.3997	20.2724	20.6484	17.5361	21.3006	21.1298	18.2034	16.8153	15.5918	16.7826	21.0751							2	2	2	5.6	5.6	5.6	50.732	0.001912	3.1071	186150000	6	10950000	0	5879000	21531000	27942000	39008000	0	3231000	5131100	0	43912000	1960400	37556000	0.405505	1	1.6533	0.95626	0.10832	1
PfIT_120019200	conserved Plasmodium protein, unknown function	13.3649	21.0953	19.0375	17.3704	20.6645	20.3758	16.0123	21.4717	17.9481	18.0723	18.9504	19.603							7	7	7	8.8	8.8	8.8	133.65	0	136.48	546220000	27	10710000	0	114260000	27443000	8641400	0	14057000	84760000	148320000	25834000	69391000	12897000	40613000	0.256316	1	1.63765	0.64472	0.0810428	1
PfIT_110023900	ATP-dependent zinc metalloprotease FTSH, putative	14.7665	20.2296	19.8649	20.4464	19.4707	19.8291	21.8841	17.1561	16.1393	17.7713	17.3871	19.8156							4	4	4	3.9	3.9	3.9	120.22	0	3.8795	486560000	7	10137000	0	59016000	45831000	68583000	185790000	0	34875000	0	0	44708000	3464500	44292000	0.383481	1	1.62838	0.911616	0.0140618	1
PfIT_020015200	conserved Plasmodium protein, unknown function	14.4334	23.1033	15.7151	13.8176	21.9402	22.2979	16.1444	23.4722	19.4475	22.3353	21.8633	22.2628							9	9	9	24.4	24.4	24.4	53.674	0	13.545	1117100000	14	44683000	0	225280000	0	0	0	132290000	100600000	290930000	95374000	128910000	17874000	125810000	0.154792	1	1.6013	0.413901	0.219897	1
PfIT_090030600	protein kinase, putative	20.2275	18.8427	22.5353	21.5092	22.0156	22.844	18.8691	21.755	22.555	16.9858	20.8503	22.6172							45	45	45	17.7	17.7	17.7	362.91	0	214	5351400000	136	41164000	159600000	61119000	790210000	388020000	62244000	16873000	551200000	460110000	245750000	978750000	801080000	836390000	0.623694	1	1.58775	1.38655	0.123439	1
PfIT_130056300	phosphatidylinositol transfer protein, putative	26.1987	20.6497	23.8597	24.9412	25.8764	24.6313	26.2425	20.0212	17.8796	26.0364	26.6112	24.4461							12	12	12	7.7	7.7	7.7	220.54	0	20.413	45926000000	23	488580000	7239700000	154640000	1430900000	3028200000	7463000000	6469200000	5790300000	100030000	9636000000	2442800000	22669000	2148500000	0.405843	1	1.58027	0.956942	0.298073	1
PfIT_140011500	conserved Plasmodium protein, unknown function	14.8184	21.5148	20.5458	19.7444	20.8197	20.9956	15.7863	22.6724	19.2714	22.3872	24.103	23.8592							4	4	4	17.8	17.8	17.8	34.725	0	9.7306	886170000	18	55385000	0	47942000	24490000	14053000	0	87770000	29613000	106960000	288300000	33452000	10125000	243470000	0.297857	1	1.56021	0.733975	0.0332169	1
PfIT_110038900	conserved Plasmodium protein, unknown function	16.6798	18.5758	13.9362	15.9949	19.6646	18.1632	16.9232	19.6538	14.2578	18.2427	17.7772	17.8637							4	4	4	2.3	2.3	2.3	262.85	0	4.7891	399650000	5	3358400	12492000	46498000	1865300	0	14789000	36912000	98896000	98156000	26731000	34932000	0	28382000	0.377279	1	1.54363	0.898977	0.0950614	1
PfIT_050036000	formin 1	15.3873	18.4808	17.2465	15.5486	20.2055	19.9833	16.5378	20.8171	17.4742	17.6568	19.3241	19.221							10	10	10	4.5	4.5	4.5	316.92	0	18.586	827530000	17	6365600	0	47557000	20214000	0	12368000	26864000	157180000	240170000	85327000	134740000	23670000	79443000	0.365066	1	1.54094	0.873999	0.321529	1
PfIT_090008600	60S ribosomal protein L32	21.7068	27.6782	27.0831	24.9529	27.81	28.3109	25.2691	28.6104	22.9475	17.7559	28.0457	27.0899							5	5	5	32.8	32.8	32.8	15.526	0	43.985	9197000000	34	1839400000	17115000	1073800000	710900000	162390000	202170000	0	1176500000	2049100000	1385400000	1664900000	40443000	714240000	0.28571	1	1.53521	0.70812	0.0157888	1
PfIT_020024600	DnaJ protein, putative	16.532	18.044	19.5412	17.7469	20.7084	20.2589	15.4845	19.6621	15.5824	17.1473	18.086	18.9069							6	6	6	6.4	6.4	6.4	117.26	0	11.797	290400000	11	5694100	4832800	0	38909000	11218000	0	0	87383000	42310000	14191000	63988000	2502300	25068000	0.533319	1	1.53236	1.21006	0.27905	1
PfIT_040014900	protein phosphatase PPM1, putative	14.6677	18.1603	15.3389	14.8915	18.7569	19.0883	17.1092	19.6414	16.0089	16.2195	20.1724	17.6697							2	2	2	3.5	3.5	3.5	105.39	0	9.2	151610000	4	2972700	0	0	0	0	7210400	0	0	41707000	60268000	28427000	3363000	10634000	0.370653	1	1.52329	0.88544	0.431781	1
PfIT_130026800	3,5-cyclic nucleotide phosphodiesterase, putative	15.0439	21.1959	16.0178	15.9483	21.4902	19.3763	17.3986	21.9471	14.7789	19.5441	20.1667	19.5204							6	6	6	7.7	7.7	7.7	133.29	0	46.087	677690000	13	13032000	0	124910000	3450300	0	8984300	39753000	153180000	210250000	61203000	35388000	1461900	39104000	0.23935	1	1.51908	0.607527	0.0773153	1
PfIT_100006000	Plasmodium exported protein (PHISTc), unknown function	16.0865	17.7031	21.1182	17.891	20.0807	21.4907	20.1668	20.959	13.9182	16.07	17.8768	21.421							2	2	2	8.1	8.1	8.1	30.407	0.0037083	2.7838	163780000	5	12598000	0	0	29591000	3160000	15302000	0	14415000	26499000	0	38308000	0	36501000	0.346707	1	1.51821	0.836205	0.00556601	1
PfIT_130070900	SNARE associated Golgi protein, putative	15.8773	22.6313	20.8018	20.2093	22.0071	21.6378	21.1054	22.7172	20.982	22.4373	22.4348	21.8406							1	1	1	2.9	2.9	2.9	47.02	0.0031526	2.9947	520110000	11	43343000	0	77962000	21935000	14548000	27074000	68151000	50582000	82746000	68036000	39156000	24854000	45066000	0.293494	1	1.51461	0.724711	0.365605	1
PfIT_080035300	Plasmodium exported protein (PHISTc), unknown function	16.8789	25.8076	25.0866	20.9211	25.667	25.7258	21.8193	25.0553	22.3587	23.465	23.867	25.4519							5	5	5	14.3	14.3	14.3	54.516	0	49.855	3540200000	30	321840000	0	646060000	391930000	21841000	40704000	127370000	586040000	383520000	168300000	610410000	59159000	504880000	0.175149	1	1.51356	0.461965	0.0553612	1
PfIT_040009400	dipeptidyl aminopeptidase 3	14.8083	22.5405	20.219	20.4617	20.4264	21.1724	21.2845	20.8814	17.4671	21.6282	18.4788	21.5071							10	10	10	13.6	13.6	13.6	107.34	0	30.883	1118200000	23	23792000	0	286730000	57364000	67874000	120050000	152350000	66234000	90785000	17170000	111080000	8516100	140080000	0.258791	1	1.49755	0.650106	0.0949478	1
PfIT_060010000	conserved Plasmodium protein, unknown function	20.8096	21.2988	24.2504	23.5691	22.6878	24.5703	22.6081	23.5203	23.8094	19.8132	23.3598	24.5589							33	33	33	36.8	36.8	36.8	123.43	0	90.548	7176700000	116	138010000	95571000	134150000	1037800000	647160000	332450000	47904000	351330000	625610000	559770000	1295400000	764440000	1285200000	0.546873	1	1.48945	1.23662	0.453266	1
PfIT_110047300	transcription factor with AP2 domain(s)	14.9246	22.0274	17.5777	16.7892	21.1996	20.9891	18.5443	22.0325	16.5724	20.4389	19.9422	21.1807							11	11	11	9.1	9.1	9.1	182.63	0	35.72	1075000000	36	18535000	0	247930000	11346000	0	22173000	82441000	139690000	248810000	58427000	120720000	5652100	137860000	0.23057	1	1.48275	0.588091	0.121892	1
PfIT_130014800	vacuolar protein sorting-associated protein 18, putative	13.8747	21.148	18.9813	17.1243	21.0714	20.232	17.4775	21.746	13.0526	17.8315	21.3911	18.8176							9	9	9	5.8	5.8	5.8	197.58	0	11.705	1046300000	28	13588000	1156600	178930000	39851000	11001000	14052000	17960000	169670000	270830000	211770000	94822000	654190	35576000	0.234833	1	1.47458	0.597544	0.0603545	1
PfIT_040028100	conserved Plasmodium protein, unknown function	17.8812	22.4527	18.1084	20.3115	21.4482	21.1037	18.1857	21.8074	14.3984	18.7173	19.4609	20.3576							13	13	13	12	12	12	191.26	0	45.396	1167800000	32	19145000	14727000	350170000	17239000	79377000	18187000	26291000	174530000	223870000	44019000	137460000	0	81952000	0.410512	1	1.47371	0.966361	0.199549	1
PfIT_040015400	conserved Plasmodium protein, unknown function	20.0872	21.9685	21.3843	21.0079	23.7089	23.1103	21.4822	23.0905	23.9822	21.973	22.0571	23.8932							28	28	28	24	24	24	149.99	0	91.34	4351400000	114	85322000	56809000	209280000	139600000	107540000	149400000	209940000	699310000	455500000	222540000	461800000	845110000	794560000	0.670308	1	1.46238	1.47734	0.863041	1
PfIT_120028900	mitochondrial carrier protein, putative	15.7889	22.8971	23.0303	21.4017	22.5115	22.1839	15.8473	22.7504	20.9151	22.2079	16.0433	21.1399							4	4	4	13.3	13.3	13.3	34.934	0	5.3632	783360000	12	46080000	0	132790000	145630000	47096000	0	82358000	101640000	119950000	0	80996000	33614000	39282000	0.238113	1	1.46025	0.604798	0.082187	1
PfIT_140027700	conserved Plasmodium protein, unknown function	15.3008	19.4645	18.4718	17.54	20.0961	19.9778	18.5832	19.9146	14.5104	18.2578	20.1525	18.7217							1	1	1	11.9	11.9	11.9	20.734	0	4.087	63597000	4	6359700	0	7234300	0	1905800	3927400	3134400	11208000	9883300	11655000	10326000	0	4323000	0.411457	1	1.45897	0.968267	0.0122626	1
PfIT_040027200	eukaryotic initiation factor 4A-III, putative	19.1231	20.3768	23.0448	20.7466	22.7264	23.4207	14.8382	21.9355	21.5787	16.1842	19.911	23.796							8	8	8	27.9	27.9	27.9	44.799	0	17.388	1170500000	25	53207000	12562000	29952000	190370000	38705000	0	0	152670000	88242000	21689000	247040000	68904000	320420000	0.442486	1	1.44968	1.0305	0.209649	1
PfIT_130024100	translocation protein SEC63	20.3105	23.2025	21.9321	22.3228	23.7266	23.7367	19.8388	23.435	20.8341	22.2416	24.1998	24.5225							13	13	13	24.6	24.6	24.6	75.871	0	32.532	3647600000	67	110530000	42912000	318550000	132050000	173110000	30944000	163640000	458070000	374240000	635870000	461290000	61686000	795270000	0.685916	1	1.44694	1.50775	0.119454	1
PfIT_050018200	conserved Plasmodium protein, unknown function	14.4497	21.2088	20.139	16.7055	21.6475	21.7813	17.0141	22.6466	15.1706	21.6477	22.1704	21.8969							1	1	1	5.2	5.2	5.2	28.852	0.0074328	2.0719	260500000	7	28944000	0	21814000	10391000	0	0	29570000	29566000	59095000	42480000	32439000	0	35144000	0.208743	1	1.44563	0.539165	0.035441	1
PfIT_120053400	RNA-binding protein, putative	15.3715	23.1225	20.5269	21.5815	19.7418	21.9679	21.9375	22.1287	14.3105	21.8631	15.7456	20.2063							2	2	2	7.3	7.3	7.3	41.967	0	13.445	421010000	7	32386000	0	118710000	19641000	40796000	52213000	49590000	11397000	59612000	0	53325000	0	15728000	0.235176	1	1.42343	0.598303	0.0208182	1
PfIT_070007300	small exported membrane protein 1	21.5541	23.3439	25.8111	25.315	23.8703	25.7632	23.508	23.7039	23.1977	22.932	24.5806	26.167							4	4	4	35	35	35	14.195	0	8.1319	2642200000	26	330280000	24632000	85175000	470990000	333950000	95436000	64021000	122680000	109310000	200710000	455620000	76966000	602750000	0.446853	1	1.41315	1.03921	0.0269551	1
PfIT_100042900	serine/threonine protein kinase, FIKK family	14.3771	20.1081	21.125	17.7044	21.0475	21.055	19.2536	20.9037	15.5353	18.5373	18.2713	21.112							4	4	4	4	4	4	107.27	0	4.8519	528410000	13	13210000	0	45206000	91475000	8543200	25002000	15218000	86690000	78472000	0	87142000	0	90657000	0.23061	1	1.39887	0.58818	0.00341217	1
PfIT_060008000	transcription factor with AP2 domain(s)	17.4018	22.8277	18.1582	18.4622	23.2864	20.8249	20.0089	22.9857	16.2075	20.5891	22.0027	21.3526							11	11	11	7.5	7.5	7.5	229.4	0	48.51	2932200000	65	38080000	0	573220000	22525000	27808000	81246000	121460000	787750000	639560000	323570000	143030000	5827100	206190000	0.252156	1	1.39529	0.635643	0.0354255	1
PfIT_100018300	conserved protein, unknown function	15.2755	21.014	19.5862	18.5014	20.2527	21.3055	19.6963	19.4938	16.8194	19.3091	19.8504	18.5328							5	5	5	1.8	1.8	1.8	283.23	0	4.212	1230600000	13	10794000	0	241400000	89733000	42304000	96848000	74052000	142420000	84161000	107770000	295460000	13184000	43234000	0.296262	1	1.39461	0.730591	0.0074768	1
PfIT_130030700	conserved Plasmodium protein, unknown function	15.3889	18.3773	18.0436	15.429	20.3466	20.1972	16.9639	20.6702	15.4083	17.0696	19.2168	20.0062							13	13	13	5.5	5.5	5.5	431.69	0	39.312	1174000000	23	6786000	0	58909000	46741000	0	22114000	23796000	230660000	288670000	105410000	207980000	7523200	182180000	0.301443	1	1.38769	0.741571	0.0794123	1
PfIT_100035100	MORN repeat-containing protein 1	15.429	20.751	20.9828	16.8269	21.4426	23.0442	19.3873	22.3706	14.3174	20.8496	21.2434	22.3135							7	7	7	25.8	25.8	25.8	41.479	0	29.585	620600000	25	31030000	0	35294000	41446000	0	13715000	37790000	57004000	108450000	49653000	173000000	0	104250000	0.205595	1	1.38366	0.532033	0.0415724	1
PfIT_140006300;PfIT_000011500	rifin	16.6338	18.0643	15.4967	14.8412	18.1767	21.2924	20.0979	18.9019	18.1966	20.6539	15.9644	18.2616							3	2	2	9.4	6.9	6.9	39.251	0.0073864	2.0395	104220000	3	6130500	0	0	0	0	19077000	28046000	0	8327100	0	43662000	5107200	0	0.274512	1	1.37186	0.684112	1.18338	1
PfIT_010007400	parasite-infected erythrocyte surface protein	19.1025	22.9962	18.0838	20.1571	21.6239	22.5083	18.8911	21.195	19.2264	21.4416	21.7726	21.8227							9	9	9	16.5	16.5	16.5	67.801	0	21.156	996430000	27	33214000	16887000	250990000	8334500	35076000	14585000	85446000	96954000	72018000	107480000	178980000	18402000	111280000	0.344421	1	1.36895	0.831477	0.0605667	1
PfIT_120034300	conserved Plasmodium protein, unknown function	19.7913	22.3136	19.4345	21.271	22.0814	22.2776	22.499	21.9246	22.6546	23.1502	21.8973	23.4235							19	19	19	22.8	22.8	22.8	115.71	0	254.87	2873200000	62	59858000	43551000	250210000	34009000	121460000	284530000	446830000	213010000	191070000	187490000	244040000	316930000	540070000	0.643276	1	1.36353	1.42469	0.924688	1
PfIT_140056800	zinc finger protein, putative	15.0556	23.3612	21.6517	19.7184	21.91	22.5162	20.1738	22.8495	16.4614	19.4525	22.2392	22.2561							15	15	15	9.2	9.2	9.2	219.36	0	34.892	3905400000	51	44380000	0	948220000	289930000	75913000	104080000	63133000	346770000	665070000	435660000	527900000	7940600	440790000	0.195357	1	1.3587	0.508696	0.0206749	1
PfIT_030024200	kinesin-8, putative	16.1263	21.3815	18.5081	19.9214	20.9423	19.1657	19.8512	16.1435	13.9649	20.7024	17.1719	18.0228							2	2	2	1.5	1.5	1.5	156.4	0.0073738	2.0249	625240000	3	9619100	0	177570000	24233000	64543000	61478000	110910000	130970000	0	0	38225000	0	17311000	0.345646	1	1.33783	0.834012	0.368087	1
PfIT_140034000	CorA-like Mg2+ transporter protein, putative	17.7642	19.7308	16.82	18.4403	20.1458	19.7415	19.2	20.7381	15.5866	16.3653	18.8764	19.399							5	5	5	9	9	9	56.682	0	5.0657	157820000	10	7173800	4897600	19141000	2545500	7825100	13250000	0	25521000	38479000	10588000	19285000	1082500	15209000	0.598601	1	1.33753	1.33765	0.0813547	1
PfIT_090039800	U2 small nuclear ribonucleoprotein B, putative	14.8499	23.712	21.6971	19.2692	22.6479	22.353	14.7964	23.1428	20.3161	16.5907	21.9368	22.1249							2	2	2	15.5	15.5	15.5	22.294	0	18.556	488560000	9	48856000	0	137410000	33999000	6318200	0	0	65721000	92616000	40145000	53569000	13054000	45735000	0.175338	1	1.33705	0.462405	0.063943	1
PfIT_140026300	conserved Plasmodium protein, unknown function	16.234	19.9815	17.9352	16.3809	21.0523	20.7272	20.5388	20.9248	14.5901	22.0342	20.9272	19.4517							3	3	3	7.2	7.2	7.2	54.73	0	4.3022	455760000	13	15716000	0	30021000	7268300	0	44176000	124550000	63064000	57727000	57827000	50338000	0	20795000	0.291513	1	1.33657	0.720494	0.0980087	1
PfIT_050028300	mitochondrial processing peptidase alpha subunit, putative	15.5205	16.7911	19.8836	16.6495	19.6147	19.9128	20.7435	17.6046	19.7693	15.6749	20.8972	21.452							5	5	5	12.4	12.4	12.4	61.772	0	5.88	289260000	6	10331000	0	0	27085000	2878300	49153000	0	22479000	0	54680000	27638000	25021000	80325000	0.328494	1	1.32727	0.798392	0.548026	1
PfIT_110018600	GTPase-activating protein, putative	15.671	22.6646	21.4228	19.7679	21.987	21.9443	20.9264	22.1819	19.8667	20.8138	21.7903	21.7832							4	4	4	10.7	10.7	10.7	44.607	0	5.6081	635960000	18	35331000	0	119680000	50604000	16070000	35871000	33178000	74818000	85642000	65286000	72637000	17209000	64965000	0.225713	1	1.31358	0.577281	0.180879	1
PfIT_140028700	conserved Plasmodium protein, unknown function	14.9646	20.5448	19.2653	14.8157	22.1948	21.6631	14.199	21.1862	15.9026	20.4925	21.0718	21.9037							4	4	4	19	19	19	38.164	0	5.6119	304050000	12	20270000	0	22945000	9451800	0	0	22128000	72012000	35790000	33063000	49812000	0	58851000	0.168308	1	1.29965	0.44593	0.16198	1
PfIT_050014100	conserved Plasmodium protein, unknown function	16.1718	17.9204	17.2217	14.3545	20.7158	20.1378	17.5861	21.3852	15.2287	18.6846	19.591	20.0091							17	17	17	5.9	5.9	5.9	369.85	0	24.985	1226500000	30	8517200	0	35722000	22009000	0	28334000	60671000	248000000	394410000	113720000	166130000	5529100	151950000	0.245032	1	1.2981	0.620034	0.198602	1
PfIT_070027600	conserved Plasmodium protein, unknown function	17.8423	17.4687	20.1596	18.8139	19.2922	21.2266	18.2554	19.2049	18.652	16.238	19.9611	20.627							7	7	7	5.5	5.5	5.5	167.57	0	93.043	533070000	16	9190800	13630000	10520000	67929000	26729000	18149000	4482700	37237000	35050000	59203000	142320000	23891000	93927000	0.50298	1	1.28739	1.15043	0.0856585	1
PfIT_050006600	parasite-infected erythrocyte surface protein	25.7168	27.6438	27.8197	26.8666	29.4111	28.7644	26.7297	29.0933	25.7132	26.8889	28.4173	27.7234							22	22	22	59.7	59.7	59.7	49.318	0	323.31	58273000000	146	3237400000	992640000	3774800000	4264200000	2202500000	2003200000	2236900000	12850000000	10309000000	6452700000	8207500000	990160000	3989000000	0.560987	1	1.28725	1.26423	0.0331977	1
PfIT_060027600	tyrosine kinase-like protein, putative	15.4432	15.9748	20.0308	17.2166	16.804	21.2487	17.2696	18.7307	17.2254	16.1593	17.8456	19.9291							11	11	11	5	5	5	281.89	0	18.34	616770000	31	5874000	0	6762200	112470000	15991000	16590000	0	12014000	45677000	24731000	261630000	16090000	104820000	0.248765	1	1.27346	0.628223	0.143556	1
PfIT_090012800	P1 nuclease, putative	16.3779	23.6629	19.9237	20.1373	21.5148	22.0957	20.0489	23.1665	20.4411	21.6375	22.7164	22.7533							4	4	4	11	11	11	51.767	0	8.0493	1249300000	13	52054000	0	318750000	23870000	27678000	26032000	78300000	71913000	225960000	165400000	107570000	34166000	169680000	0.226031	1	1.26113	0.577989	0.20485	1
PfIT_020007200	gamete antigen 27/25, putative	20.8552	23.6672	22.5367	20.1684	25.0511	25.6092	23.2001	25.6137	21.6753	23.9449	24.7249	25.1163							35	35	35	36.8	36.8	36.8	141.22	0	323.31	14169000000	133	253010000	106230000	745980000	340730000	65991000	539670000	904370000	1946800000	2875300000	1552800000	2866300000	187550000	2036800000	0.262132	1	1.25653	0.657364	0.335105	1
PfIT_130031700	translation initiation factor eIF-2B subunit gamma, putative	15.4778	22.5865	21.2245	19.0683	22.0602	21.9192	15.6294	20.2905	19.5544	19.4736	21.561	21.8557							4	4	4	8.5	8.5	8.5	55.041	0	5.3531	709970000	15	27307000	0	163750000	63705000	14292000	0	18928000	113700000	33346000	80443000	103110000	20018000	98675000	0.202515	1	1.25297	0.525036	0.185593	1
PfIT_110038400	RNA (uracil-5-)methyltransferase, putative	16.8511	23.7486	21.4144	18.9988	24.0595	22.7144	20.62	23.5034	21.1094	21.0291	23.1215	22.1547							12	12	12	14.2	14.2	14.2	101.56	0	40.101	2718700000	58	73477000	0	521460000	103410000	19383000	59626000	79175000	646890000	439960000	337660000	254640000	83705000	172750000	0.18962	1	1.25289	0.495524	0.185004	1
PfIT_030027500	conserved Plasmodium protein, unknown function	16.8956	15.556	18.1696	19.9052	18.4128	16.0548	15.9428	15.6571	11.6495	19.0377	14.6833	19.1315							3	3	3	1	1	1	367.25	0.0036563	2.6952	488780000	4	2998700	0	7852600	48061000	160050000	10267000	87723000	56886000	8422400	4288500	11096000	523660	93614000	0.390315	1	1.25053	0.925507	0.711266	1
PfIT_110020700	guanine nucleotide-exchange factor SEC12	16.4567	22.6646	19.8976	19.6128	21.3602	21.7642	20.3926	21.3707	20.8551	20.7312	21.2084	22.8209							9	9	9	19.6	19.6	19.6	56.516	0	18.86	902670000	28	32238000	0	186150000	27348000	22450000	38542000	48738000	75372000	75922000	67846000	99731000	53109000	207460000	0.257771	1	1.23947	0.647887	0.263391	1
PfIT_050024700	carbon catabolite repressor protein 4, putative	15.8501	16.298	17.4158	16.8234	18.2822	18.1663	15.1764	18.0377	14.2654	14.421	17.0477	16.5599							5	5	5	2.4	2.4	2.4	290.21	0	5.7877	119470000	5	1312800	5375100	7332000	15912000	0	0	0	29009000	24487000	0	26769000	1792000	8791600	0.871218	1	1.236	1.87201	0.220547	1
PfIT_110008900	conserved protein, unknown function	21.263	22.9017	24.0049	22.2747	24.5751	25.0098	22.3519	23.3964	22.9836	23.4257	24.4189	25.1383							12	12	12	31.1	31.1	31.1	49.266	0	22.047	4286100000	58	186350000	57882000	180230000	387180000	116700000	123120000	259160000	574860000	253940000	515890000	776990000	190760000	849420000	0.455707	1	1.22999	1.05685	0.0774113	1
PfIT_140039300	SF-assemblin, putative	17.5056	22.6644	19.5205	18.5318	23.4695	21.3579	20.4791	23.0017	19.1052	21.8615	22.0509	21.9564							4	4	4	18.2	18.2	18.2	31.248	0	8.6668	805140000	15	44730000	0	119660000	13538000	6821600	26309000	68590000	209060000	151170000	78209000	48376000	10151000	73250000	0.231326	1	1.22285	0.589771	0.196748	1
PfIT_060016200	leucine-rich repeat protein	14.0112	19.7358	18.483	13.4578	21.8467	20.5911	17.2045	21.4586	16.504	15.4135	17.2877	20.6284							17	17	17	9.6	9.6	9.6	219.54	0	32.291	936170000	38	11558000	1337500	70722000	29678000	0	12233000	3535200	305490000	233440000	12960000	127940000	7527800	131300000	0.14461	1	1.22185	0.389453	0.157642	1
PfIT_140075200	conserved Plasmodium protein, unknown function	15.1001	18.8204	21.2478	20.1033	17.3114	21.3636	19.2309	18.8735	21.0605	20.8173	17.9508	21.8632							19	19	19	24.5	24.5	24.5	97.344	0	35.153	814770000	46	15976000	0	23609000	127000000	57444000	31380000	94231000	0	24494000	12921000	137610000	111530000	194550000	0.21766	1	1.20332	0.559262	0.280439	1
PfIT_130011700	V-type proton ATPase subunit H, putative	18.2233	22.4747	22.3368	22.1883	22.0357	22.4075	21.1076	21.736	23.8259	16.4964	21.2144	22.8128							3	3	3	6.6	6.6	6.6	53.743	0	4.8039	1581900000	18	56497000	8568700	163200000	148320000	133810000	63268000	0	120390000	97799000	68125000	155770000	416360000	206300000	0.356805	1	1.1989	0.857032	0.304696	1
PfIT_070012800	ribosomal protein S8e, putative	16.0145	22.2349	22.8898	19.4181	21.5601	23.7477	15.6011	22.496	13.093	16.0925	20.9469	20.1869							4	4	4	15.8	15.8	15.8	30.268	0	7.2328	436860000	9	39715000	0	54294000	85488000	7706000	0	0	34012000	65067000	22235000	154930000	0	13130000	0.180322	1	1.19558	0.474016	0.392785	1
PfIT_100030000	conserved Plasmodium protein, unknown function	18.0318	20.2832	20.192	17.0933	22.6528	22.2799	20.2598	23.1141	16.6957	22.1682	22.2764	21.555							12	12	12	9.7	9.7	9.7	156.46	0	68.022	2386700000	46	37883000	16884000	80387000	75459000	8809500	79095000	296920000	415450000	572000000	320050000	320810000	6687700	194100000	0.238155	1	1.17302	0.60489	0.0930762	1
PfIT_060029800	conserved Plasmodium protein, unknown function	14.7354	16.8921	17.0021	16.3614	18.0143	17.7713	16.7693	18.283	13.5285	17.1044	16.3854	16.6338							2	2	2	1.4	1.4	1.4	209.32	0.00065876	3.5581	121760000	5	1623500	2045700	9122500	9844300	6314200	8377700	10569000	19856000	23922000	6420300	16778000	886180	7626800	0.580674	1	1.17243	1.30268	0.00336082	1
PfIT_140033100	phosphoenolpyruvate carboxylase	15.6388	21.6643	21.4615	19.5501	20.5123	22.1779	19.4278	19.2831	21.5127	18.4012	19.4836	22.0928							15	15	15	14.5	14.5	14.5	133.87	0	115.36	1386400000	36	23107000	0	199410000	173270000	46060000	42315000	20771000	89737000	38278000	43985000	284690000	179520000	268380000	0.212052	1	1.15858	0.546641	0.0817337	1
PfIT_100025500	endomembrane protein 70, putative	14.8246	19.8008	20.7516	18.3742	20.0186	20.4204	15.7776	17.6729	20.8003	15.5723	16.0027	21.3239							5	5	5	9.5	9.5	9.5	72.533	0	11.921	178830000	9	9935300	0	16441000	31779000	6116100	0	0	19120000	0	0	25259000	32868000	47252000	0.23141	1	1.1454	0.589956	0.0551207	1
PfIT_140061600	methyltransferase, putative	15.7419	22.2853	20.9098	19.1246	21.7287	21.4989	20.8101	22.5998	14.9075	17.743	21.3061	21.9023							5	5	5	28.8	28.8	28.8	23.99	0	9.7657	374390000	11	28800000	0	66449000	25610000	7430800	23901000	0	45177000	82636000	33707000	38526000	0	50958000	0.203526	1	1.1384	0.527335	0.0225329	1
PfIT_120030000	splicing factor 3B subunit 6, putative	21.7397	21.8688	16.7425	20.621	21.2434	21.8669	21.4198	22.804	13.798	22.476	22.1569	21.912							1	1	1	13.2	13.2	13.2	12.263	0.0095345	1.9322	239010000	7	39836000	21012000	22978000	0	9676100	16832000	35002000	14895000	43937000	28058000	22948000	0	23676000	0.260121	1	1.12678	0.652997	0.0841046	1
PfIT_060017800	transcription factor with AP2 domain(s)	17.2394	22.2095	14.9224	14.8467	22.9217	19.9324	16.9859	21.8661	15.0888	18.7692	20.8748	19.9952							30	30	30	9.4	9.4	9.4	482.33	0	73.94	3942000000	68	21194000	0	902060000	5775400	0	24142000	83102000	1477800000	710980000	357630000	186110000	0	194390000	0.127587	1	1.10988	0.347916	0.0161363	1
PfIT_120036800	asparagine-rich protein, putative	20.9227	22.0958	22.6861	22.4113	23.2026	23.4111	21.4521	23.3015	22.3183	20.2267	22.6847	22.8482							25	25	25	16.4	16.4	16.4	211.94	0	110.44	5516900000	126	73559000	149080000	336180000	506110000	418350000	215170000	92024000	724000000	775320000	505640000	836540000	392230000	566300000	0.855819	1	1.10678	1.84139	0.241527	1
PfIT_040018400	structural maintenance of chromosomes protein 3, putative	26.3526	21.6508	25.5624	25.5591	26.2561	25.0699	21.1747	22.5277	14.296	26.4878	26.5424	25.4857							8	8	8	7.9	7.9	7.9	141.22	0	15.738	36338000000	14	550570000	5655500000	217310000	3270300000	3263000000	156240000	6210900000	5289500000	399080000	6450500000	2324500000	0	3100900000	0.301036	1	1.10645	0.74071	0.819085	1
PfIT_130026000	conserved Plasmodium protein, unknown function	14.67	18.6548	18.9215	14.4219	20.1978	20.9388	18.873	20.8645	17.1426	18.4567	19.8571	20.8688							12	12	12	9.4	9.4	9.4	170.81	0	31.501	744630000	27	9928400	1955100	30955000	37240000	1646300	36009000	26982000	90202000	143180000	71227000	150760000	10852000	143620000	0.168255	1	1.10409	0.445803	0.370401	1
PfIT_130038200	isoleucine--tRNA ligase, putative	15.9997	21.1614	21.1401	18.7388	20.9562	21.9162	21.8207	20.1034	21.1193	18.1244	16.9782	22.2269							13	13	13	12.7	12.7	12.7	151.31	0	26.882	1590400000	45	23389000	0	159490000	157150000	29747000	251870000	19432000	138340000	76603000	0	269120000	154910000	333790000	0.21956	1	1.10333	0.563524	0.370007	1
PfIT_110028700	U6 snRNA-associated Sm-like protein LSm1, putative	15.6192	23.6021	23.081	22.1457	19.9302	23.5151	21.2818	23.9558	20.02	24.7134	24.0715	21.8584							3	3	3	23.8	23.8	23.8	17.341	0.00066756	3.7168	1070600000	8	107060000	0	127330000	88730000	46400000	25495000	275090000	0	162710000	176300000	119880000	10632000	38023000	0.146517	1	1.09626	0.394053	0.127782	1
PfIT_140064300	conserved Plasmodium protein, unknown function	13.8352	19.4113	18.2105	16.6398	18.6479	19.438	18.439	18.649	16.3881	15.2609	17.5962	19.5851							6	6	6	1.8	1.8	1.8	417.44	0	12.645	698410000	19	4060500	0	119930000	52172000	17563000	61123000	0	70651000	70700000	34081000	122170000	14751000	135280000	0.225626	1	1.08956	0.577087	0.134734	1
PfIT_140036600	plasmepsin IX	17.1924	22.3316	16.8675	16.695	22.0129	20.9433	19.3868	21.2976	16.4173	22.4068	20.9747	20.8892							5	5	5	9.3	9.3	9.3	74.182	0	14.08	884170000	14	24560000	0	190010000	4304500	0	24678000	200180000	152360000	92794000	74185000	72590000	3150800	69915000	0.171059	1	1.0866	0.452392	0.0353066	1
PfIT_130072900	ribosome biogenesis protein MRT4, putative	15.9347	26.1887	21.2606	19.8376	24.3152	22.4815	20.794	24.7139	18.2971	22.3742	23.5797	22.9822							7	7	7	31.5	31.5	31.5	25.827	0	37.532	1788400000	31	162580000	0	841340000	27636000	10307000	19999000	59799000	229610000	302710000	137910000	64415000	3543100	91141000	0.122394	1	1.08344	0.335069	0.0132567	1
PfIT_130037700	nucleotidyltransferase, putative	16.4794	19.4009	19.5273	16.5568	20.7534	21.3219	13.0079	20.656	14.0471	19.7528	20.5498	19.7565							4	4	4	4.8	4.8	4.8	102.01	0	5.6443	446480000	7	10890000	0	28382000	30981000	3952600	0	36220000	72476000	67740000	62936000	107480000	0	36315000	0.234279	1	1.07486	0.596317	0.421836	1
PfIT_070010600	40S ribosomal protein S29, putative	16.4504	28.5235	26.8571	22.2704	26.0469	26.7338	21.9061	29.1897	15.5271	16.1059	27.9225	25.2834							3	3	3	18.5	18.5	18.5	6.4156	0.00065963	3.571	4814600000	13	1604900000	0	1157600000	364670000	15177000	11790000	0	207980000	1836900000	763190000	334790000	0	122510000	0.0953538	1	1.07332	0.266718	0.115458	1
PfIT_130012800	conserved Plasmodium protein, unknown function	15.3685	21.263	20.7915	17.5545	21.4079	21.6734	18.4883	21.6214	18.6147	21.0045	21.6969	21.1533							8	8	8	8.5	8.5	8.5	144.13	0	50.326	1373900000	36	22524000	2580500	153510000	110710000	11743000	22431000	128320000	169730000	196790000	207380000	204010000	24486000	142260000	0.175636	1	1.07093	0.463102	0.0705909	1
PfIT_030026500	microtubule and actin binding protein, putative	14.9291	19.8783	16.9645	14.5141	21.4034	19.0481	13.4749	20.9616	15.2242	15.8833	14.6269	16.5077							13	13	13	7.6	7.6	7.6	229.59	0	20.511	629130000	23	6622500	2963700	91559000	12150000	2222800	0	0	263500000	193990000	2403600	51495000	0	8851800	0.161252	1	1.06452	0.429267	0.0938088	1
PfIT_120042400	conserved Plasmodium protein, unknown function	21.2582	21.515	22.3293	22.6045	22.549	23.1413	22.7966	21.6801	21.3785	21.0579	21.2778	22.8312							21	21	21	15.2	15.2	15.2	193.48	0	66.487	4067000000	82	58100000	175570000	209770000	368880000	446410000	510000000	152810000	429570000	235210000	177970000	647630000	190840000	522350000	1.33128	1	1.06411	2.8449	0.176736	1
PfIT_070034300	conserved Plasmodium protein, unknown function	16.5974	24.5709	22.967	20.5293	22.7724	23.9904	21.4427	23.8992	22.5154	24.2691	22.8784	24.8056							3	3	3	20.9	20.9	20.9	17.801	0	7.0655	981460000	13	140210000	0	174450000	57392000	10593000	19952000	141530000	50149000	109510000	53972000	116660000	41967000	205270000	0.148551	1	1.05223	0.39895	0.186831	1
PfIT_090028900	conserved Plasmodium protein, unknown function	15.8643	18.7677	19.7713	15.3372	21.4633	20.6712	18.3946	19.381	12.1693	20.5083	18.5576	19.7953							4	4	4	3.8	3.8	3.8	140.02	0	5.7213	507430000	11	9758300	0	23208000	46533000	2152600	17920000	77559000	150350000	35503000	20063000	86827000	0	47312000	0.171798	1	1.02281	0.454125	0.228875	1
PfIT_140045600	DEAD/DEAH box helicase, putative	19.8414	17.8635	18.1629	19.8483	18.718	20.367	19.3986	19.4132	14.8655	19.0086	16.0982	16.7605							3	3	3	1.3	1.3	1.3	292.35	0.0019194	3.1909	795020000	6	6115500	122120000	31002000	38153000	122710000	89848000	68565000	56055000	90762000	0	175800000	0	0	0.580355	1	1.02179	1.30206	0.168719	1
PfIT_060031900	HECT-domain (ubiquitin-transferase), putative	15.0693	21.5904	17.4306	17.1647	20.616	19.367	17.8867	20.6711	15.6556	18.5984	19.643	19.3997							46	46	46	5.2	5.2	5.2	1205.6	0	123.2	5018500000	105	9669600	17844000	1638800000	91687000	76250000	125780000	205990000	834070000	866540000	424920000	350910000	26789000	358980000	0.179681	1	1.01911	0.472527	0.00561183	1
PfIT_050027800	inner membrane complex protein	18.7981	24.084	21.6651	21.4379	23.6702	22.4783	22.2638	23.4661	22.9688	23.7385	23.5995	24.0715							9	9	9	21.1	21.1	21.1	55.563	0	85.697	2029800000	29	112770000	8204600	320100000	59856000	51134000	90644000	251930000	240280000	208580000	228780000	105180000	147760000	317340000	0.240892	1	1.01309	0.610927	0.369506	1
PfIT_140053100	conserved Plasmodium protein, unknown function	13.921	24.4722	21.7944	15.3539	24.6338	23.237	18.6969	23.8559	21.7446	21.4623	23.5082	23.474							9	9	9	36.4	36.4	36.4	42.631	0	44.041	2060000000	32	108420000	0	442210000	69108000	0	8073700	54896000	494620000	288450000	226700000	187840000	66762000	221360000	0.083604	1	1.01236	0.236185	0.145287	1
PfIT_070015100	conserved Plasmodium protein, unknown function	16.7725	22.1121	20.2073	18.8744	22.7467	20.4978	18.5757	23.0863	16.1937	17.1746	21.2337	20.2316							45	45	45	17.7	17.7	17.7	357.44	0	188.11	4688000000	98	28072000	18695000	757060000	202180000	80253000	65249000	24704000	1175400000	1487300000	411820000	247250000	12517000	205610000	0.202252	1	1.00898	0.524437	0.0556749	1
PfIT_120050100	cytoplasmic translation machinery associated protein, putative	14.6483	17.6142	21.2236	15.6507	18.7974	22.0601	20.0817	21.4065	15.1999	21.331	20.4538	21.6875							4	4	4	10.1	10.1	10.1	39.692	0	4.5247	272440000	9	18163000	0	0	36732000	0	16645000	39570000	0	41695000	21543000	65593000	0	50661000	0.140588	1	1.00738	0.379716	0.14834	1
PfIT_110022200	conserved Plasmodium protein, unknown function	14.141	15.8293	16.5415	13.3746	17.3784	18.7786	15.9555	16.619	13.3754	15.2801	17.8943	17.3077							3	3	3	2.3	2.3	2.3	174.23	0	4.5576	106020000	4	1308900	1463400	4715900	7726100	0	0	0	13800000	8152400	19733000	36426000	860750	13141000	0.222053	1	1.00662	0.569106	0.0528964	1
PfIT_140071000	ATP synthase (C/AC39) subunit, putative	20.7119	17.3367	21.6908	20.0657	21.0408	21.6457	20.2117	17.9896	22.2955	15.3465	18.5334	22.8745							8	8	8	22.5	22.5	22.5	44.497	0	44.017	565180000	22	25690000	37785000	0	74475000	24143000	26714000	0	47461000	0	0	72179000	113250000	169170000	0.290778	1	1.00423	0.71893	0.0477179	1
PfIT_140017300	conserved Plasmodium protein, unknown function	18.1108	22.4151	21.5008	18.7333	24.0807	22.2118	16.3412	23.6007	20.2874	20.4885	22.3629	22.2001							7	7	7	14.1	14.1	14.1	39.831	0	12.823	1093700000	27	57563000	5378400	106260000	56381000	8280000	0	27950000	337100000	241700000	102480000	92297000	24314000	91546000	0.187056	1	0.9997	0.489612	0.0859194	1
PfIT_140061100	6-phosphogluconate dehydrogenase, decarboxylating, putative	19.6012	17.3088	16.2691	19.5375	18.6887	17.9395	19.3047	17.8589	16.0758	19.7692	20.784	19.7364							2	2	2	4.1	4.1	4.1	52.993	0.0068926	2.1078	156470000	2	6519500	19089000	0	0	18264000	15542000	21446000	10140000	0	43333000	6033100	1657600	20963000	0.385483	1	0.995502	0.915689	0.00484359	1
PfIT_030013100	conserved Plasmodium protein, unknown function	16.1818	24.3043	20.7593	18.8072	22.9315	22.4865	21.749	23.2992	19.2706	19.7768	20.5369	22.9052							5	5	5	15.1	15.1	15.1	38.944	0	6.5112	1108500000	18	61581000	0	372910000	31948000	8256400	63442000	16169000	143990000	185800000	27383000	105770000	11384000	141390000	0.136284	1	0.99324	0.369245	0.144795	1
PfIT_100017300	conserved Plasmodium protein, unknown function	20.074	20.9027	21.4926	21.0002	22.0333	22.4033	21.0998	20.7713	22.5944	21.6307	22.4209	23.1934							12	12	11	19.6	19.6	18.5	75.468	0	22.244	1450100000	35	46776000	34218000	60773000	91471000	65021000	69669000	100660000	133060000	55482000	174080000	171960000	196310000	297360000	0.775424	1	0.989166	1.68273	0.405563	1
PfIT_140027100	glycine--tRNA ligase	14.8498	17.4787	19.4847	17.274	17.4906	20.0103	15.9741	18.6451	19.4113	17.4928	17.5309	20.795							6	6	6	9	9	9	104.15	0	8.4332	287840000	12	5430900	0	9680600	38883000	8400200	0	0	9760700	21728000	10037000	55976000	36953000	96422000	0.242994	1	0.987249	0.615555	0.163695	1
PfIT_120059100;PfIT_000009900	acyl-CoA synthetase	17.0901	19.0865	17.274	18.4109	19.4674	18.5323	17.4982	18.0772	16.0322	18.1109	16.661	17.3847							4	3	3	4.5	3.1	3.1	99.115	0.0037152	2.7879	87989000	4	2046300	5999200	0	0	14987000	0	12173000	31170000	0	0	16302000	0	7358600	0.616171	1	0.986626	1.3719	0.280683	1
PfIT_090036900	protein MAM3, putative	17.8423	23.3645	20.2758	18.8997	22.7961	22.7344	19.9788	23.7227	16.5005	22.1247	23.1947	22.4338							16	16	16	15	15	15	145.82	0	38.198	3155100000	58	61864000	11985000	550790000	64745000	24943000	52699000	233230000	371440000	706020000	489640000	355890000	4728500	288940000	0.182315	1	0.982536	0.478642	0.0561112	1
PfIT_040027800	conserved Plasmodium protein, unknown function	14.7995	18.1152	16.3068	14.6026	20.2189	17.3403	16.9903	20.6717	16.0483	16.245	18.5777	19.3189							2	2	2	7.4	7.4	7.4	57.609	0	60.28	100760000	6	4380900	0	0	1864500	0	2994300	0	28069000	38418000	8998300	3816600	1558600	15042000	0.200454	1	0.980098	0.520343	0.366699	1
PfIT_090020000	6-phosphofructokinase	15.6824	20.9319	19.1293	18.257	19.3742	21.0495	15.2265	20.9858	19.8556	19.9891	16.7812	20.6947							14	14	14	12.6	12.6	12.6	159.34	0	39.408	931510000	22	11500000	0	162030000	46449000	25375000	0	84293000	55041000	168200000	0	175800000	76845000	137480000	0.219085	1	0.979065	0.562459	0.0153069	1
PfIT_010005700	ring-infected erythrocyte surface antigen	28.5273	27.8539	26.4282	28.0828	28.8255	28.8342	29.1475	29.5948	25.1113	26.2449	26.1938	23.5777							42	42	42	31.8	31.8	31.8	124.94	0	323.31	117770000000	289	3568900000	12767000000	8005100000	2979900000	9381800000	19624000000	2624400000	15699000000	26757000000	2533000000	15794000000	1196100000	413150000	0.664415	1	0.977746	1.46586	0.0789508	1
PfIT_110045500	conserved Plasmodium protein, unknown function	18.7396	22.6218	21.7982	18.5935	24.4852	22.9901	21.1499	24.5666	19.9607	22.1086	23.6205	22.7061							16	16	16	17.2	17.2	17.2	120.54	0	66.429	5141300000	72	95209000	23636000	348530000	196930000	21360000	125650000	244200000	1268200000	1341800000	696450000	449900000	55101000	369510000	0.172633	1	0.969777	0.456081	0.17514	1
PfIT_010007700	StAR-related lipid transfer protein	15.2963	22.9336	22.2638	18.8397	21.7146	22.8406	20.7771	21.4641	21.6862	22.4682	21.3021	23.1671							10	10	10	30.6	30.6	30.6	53.441	0	69.986	1107500000	29	50339000	0	176250000	110790000	10321000	39531000	127650000	75712000	63644000	56885000	165240000	74237000	207200000	0.130844	1	0.96702	0.355931	0.176796	1
PfIT_080010800	serine/threonine protein kinase, FIKK family	16.1557	21.7436	18.1981	16.0787	22.6828	20.2314	18.8487	22.2817	17.01	18.9717	21.0095	20.5419							13	13	13	11.1	11.1	11.1	170.44	0	60.329	1600600000	41	21630000	0	259840000	22254000	0	34935000	38044000	498230000	377300000	156220000	91095000	9766700	112970000	0.141581	1	0.965175	0.382124	0.109582	1
PfIT_130061200	splicing factor 3B subunit 5, putative	22.3236	21.7229	22.0512	23.3153	22.9253	22.751	23.9756	17.7971	20.4136	24.5197	17.4847	22.4931							4	4	4	55.8	55.8	55.8	10.109	0	4.5077	518200000	11	86367000	31494000	20768000	26075000	62629000	98974000	144310000	47792000	0	0	42353000	8380200	35421000	1.79444	1	0.964624	4.00576	0.293525	1
PfIT_130045000	conserved Plasmodium protein, unknown function	15.8617	15.938	16.7208	15.7165	18.1912	17.499	14.9522	18.9321	14.1815	16.9717	16.6246	17.532							2	2	2	2.3	2.3	2.3	233.69	0.0019417	3.3735	152840000	5	1528400	5954500	0	10801000	5384300	3170000	0	29929000	50020000	10104000	18524000	0	18952000	0.539946	1	0.962056	1.22305	0.0342107	1
PfIT_100025400	conserved Plasmodium membrane protein, unknown function	15.9783	19.6312	19.9855	15.1849	21.9488	21.3348	16.2453	17.9736	20.9403	18.6587	21.4755	21.3655							5	5	5	10.4	10.4	10.4	55.133	0	5.3637	364910000	11	16587000	0	17864000	22838000	0	0	9104200	89056000	0	64147000	58190000	44268000	59442000	0.141315	1	0.957828	0.38148	0.025944	1
PfIT_050011000	conserved Plasmodium membrane protein, unknown function	17.4596	22.2243	21.711	19.7025	21.4016	23.1467	19.8697	23.2011	18.739	21.9359	23.3346	22.8157							14	14	14	19.2	19.2	19.2	110.68	0	199.52	2340700000	48	54434000	7750400	210700000	147610000	36687000	41196000	172510000	119120000	414660000	454840000	399330000	18813000	317440000	0.203183	1	0.951984	0.526555	0.0228931	1
PfIT_140024400	DNA replication licensing factor MCM2	15.4079	21.2587	17.012	18.4709	21.2319	16.7607	18.6782	20.0234	17.2759	18.3802	19.6661	18.0526							4	4	4	5.4	5.4	5.4	111.45	0	5.2893	470590000	12	8556200	0	137990000	7269400	19983000	23070000	18765000	135460000	58611000	45755000	0	8728000	14953000	0.159973	1	0.928299	0.426233	0.148853	1
PfIT_110049400	serine/threonine protein kinase, putative	15.6059	17.9035	17.0519	16.4071	19.4748	17.4251	16.1995	19.6929	15.2268	17.9931	18.2695	17.5864							2	2	2	0.8	0.8	0.8	237.25	0.0079007	1.9958	263240000	6	2771000	0	23292000	0	0	0	24785000	69217000	80516000	30019000	16719000	0	18696000	0.336109	1	0.915257	0.814242	0.0418745	1
PfIT_020017400	Leu/Phe-tRNA protein transferase, putative	15.6246	22.06	21.7582	20.8691	20.7074	20.603	20.2596	19.1115	19.6884	17.1177	16.4308	23.0773							5	5	5	16.2	16.2	16.2	42.939	0	9.2003	505900000	13	24090000	0	91819000	74492000	40219000	26361000	0	35957000	0	0	33446000	17742000	185860000	0.163582	1	0.912202	0.434782	0.0200486	1
PfIT_050032800	conserved Plasmodium protein, unknown function	19.3514	20.909	17.2867	20.656	21.0839	18.5341	19.4957	19.7193	19.5424	20.7506	19.6636	20.2183							3	3	3	7	7	7	52.971	0.00066979	3.7513	379120000	4	13073000	19398000	57102000	0	47914000	21438000	51161000	64462000	25032000	24083000	11008000	22144000	35377000	0.278491	1	0.908965	0.692662	0.142252	1
PfIT_010013700	phosphatidylinositol-4-phosphate 5-kinase	15.8581	20.3568	19.2095	17.877	20.1924	20.0817	16.1993	20.041	13.9783	17.3063	17.948	19.5674							8	8	8	5	5	5	199.29	0	10.68	588550000	18	6843600	0	115490000	52137000	20702000	6471000	13939000	103040000	92778000	21746000	95433000	0	66815000	0.230493	1	0.908915	0.587919	0.319391	1
PfIT_110020100	conserved Plasmodium protein, unknown function	23.9074	23.4056	23.7682	23.8912	24.6262	25.2782	24.6964	25.0067	18.0971	24.7883	24.1665	23.6939							6	6	6	18.8	18.8	18.8	33.908	0	17.057	4916600000	40	245830000	314670000	222230000	285730000	311170000	543710000	579500000	517920000	674200000	376610000	813810000	5607800	271400000	0.992222	1	0.904827	2.11594	0.184765	1
PfIT_070034400	conserved Plasmodium protein, unknown function	15.5263	19.8195	14.522	14.9719	20.0672	17.5416	11.3796	19.5179	13.0157	17.4405	18.1282	17.7886							7	7	7	2.5	2.5	2.5	329.85	0	7.4197	510010000	12	3722700	0	126760000	3223200	4402600	365020	24368000	150500000	102850000	39251000	26138000	1134600	31020000	0.154269	1	0.904327	0.412652	0.267265	1
PfIT_140045800	conserved Plasmodium protein, unknown function	17.1062	22.6264	19.9926	17.13	22.4595	22.8373	18.5606	22.2801	14.1177	20.1768	21.5082	21.1523							17	17	17	12.4	12.4	12.4	220.37	0	42.977	2677900000	52	33060000	11428000	524470000	84495000	11618000	31318000	96007000	467170000	412550000	241610000	607000000	1440000	188780000	0.136427	1	0.900536	0.369594	0.217103	1
PfIT_140040600	calmodulin	15.6458	23.1339	19.3817	14.5748	22.807	23.4749	15.2694	23.4535	21.4453	20.86	22.2714	22.9534							6	6	6	53.7	53.7	53.7	16.931	0	34.165	524840000	15	58315000	0	82839000	6147800	0	0	17128000	66043000	103390000	45563000	104930000	25699000	73096000	0.0890887	1	0.898438	0.250505	0.0715	1
PfIT_130024000	conserved Plasmodium protein, unknown function	15.7363	20.8222	16.9441	14.9959	21.4734	19.7133	15.0768	20.6635	14.454	20.1666	20.2218	19.5342							5	5	5	7.6	7.6	7.6	88.572	0	14	422850000	11	10571000	0	74161000	5043700	0	0	47077000	116470000	66437000	48910000	34383000	0	30369000	0.133282	1	0.893346	0.361909	0.16624	1
PfIT_140024300	conserved Plasmodium protein, unknown function	14.5808	23.7775	20.1375	16.691	23.5046	20.979	14.7469	23.4895	12.2943	19.7381	20.6718	18.7447							4	4	4	15.2	15.2	15.2	26.742	0	6.5577	619660000	8	44261000	0	201310000	16148000	0	0	12243000	166610000	164880000	23387000	28936000	0	6149500	0.0958317	1	0.892924	0.267949	0.242323	1
PfIT_050024900	conserved Plasmodium protein, unknown function	15.6666	24.4973	25.5577	17.0072	25.5326	25.8549	21.3636	25.9699	20.5623	22.033	25.461	24.5304							10	10	10	42.2	42.2	42.2	22.734	0	136.39	2944100000	43	327120000	0	213140000	444520000	1185600	24284000	38623000	436850000	591530000	415700000	546200000	13936000	218090000	0.0732199	1	0.891068	0.208739	0.0713014	1
PfIT_050020200	pre-mRNA-splicing factor CWC2, putative	19.3732	23.9334	23.0786	20.8414	23.8834	24.3317	21.1493	23.8488	18.3291	19.3215	22.3077	23.1398							14	14	14	19.2	19.2	19.2	98.698	0	120.84	2809400000	47	96876000	19693000	464570000	256890000	54487000	67447000	19000000	448760000	438130000	150550000	612310000	9550200	268020000	0.19194	1	0.890457	0.50086	0.183164	1
PfIT_050006400	Plasmodium exported protein, unknown function	25.8001	25.1542	27.6501	26.4707	27.1634	27.641	25.389	26.7114	25.562	25.0549	27.0564	26.8495							5	5	5	16.9	16.9	16.9	30.715	0	32.466	17608000000	27	1257700000	817980000	522760000	2948800000	1302000000	615130000	487970000	2104400000	1538400000	1954000000	2930300000	693530000	1692900000	0.469199	1	0.890196	1.08366	0.135429	1
PfIT_030015000	phd finger protein, putative	14.5447	15.4066	14.9641	14.732	16.5452	16.3015	14.6866	14.345	15.3587	11.1159	16.3332	14.6575							3	3	3	0.8	0.8	0.8	515.59	0	4.2225	77356000	5	407130	4540800	8252900	6073000	0	0	421670	18170000	3954000	15687000	15346000	0	4910300	0.64666	1	0.887783	1.43128	0.170496	1
PfIT_060017300	rhoptry protein ROP14	19.1826	24.6958	20.1498	19.1635	23.6364	23.8871	22.3521	24.6372	21.3406	23.0464	24.0665	23.6779							34	34	34	26.4	26.4	26.4	171.98	0	156.19	7382500000	142	131830000	33321000	1521900000	65142000	32884000	299800000	485100000	730220000	1461300000	983840000	868790000	148710000	751540000	0.143617	1	0.886283	0.387053	0.296827	1
PfIT_140052600	M17 leucyl aminopeptidase	18.457	22.2822	23.356	20.7367	22.4964	23.4889	20.6342	22.2224	23.5	18.2566	20.3796	23.4978							11	11	11	21.3	21.3	21.3	68.048	0	23.66	2228800000	34	67538000	11874000	168310000	354280000	57660000	53708000	10335000	195250000	161480000	45017000	388480000	391470000	390890000	0.199409	1	0.875617	0.517959	0.167011	1
PfIT_120017100	DNA replication licensing factor MCM5, putative	14.5582	21.9376	18.5792	16.4162	22.151	19.1229	15.6107	22.2108	21.2405	20.4514	21.0729	21.0025							13	13	13	21.6	21.6	21.6	85.858	0	16.153	908350000	23	22709000	0	160670000	15666000	0	0	57352000	186290000	194170000	88231000	22835000	99103000	84031000	0.117455	1	0.871708	0.322771	0.169374	1
PfIT_040020200	RING zinc finger protein, putative	17.5294	22.6617	16.3702	16.7569	21.3352	21.0792	15.1765	22.4085	19.197	21.2206	21.4927	21.115							8	8	8	10.9	10.9	10.9	105.97	0	66.25	1016600000	22	25415000	0	265400000	3388400	0	0	97746000	105820000	222690000	118030000	88619000	24039000	90843000	0.131224	1	0.869974	0.356863	0.00849205	1
PfIT_100032700	merozoite TRAP-like protein	15.6405	18.7158	14.8145	13.7669	19.1243	18.864	14.9196	15.4998	15.5548	14.4006	19.2663	18.9476							4	4	4	16	16	16	56.887	0	5.7445	66631000	4	2776300	0	10333000	0	334550	743790	519070	13715000	1112000	15134000	11451000	1155200	12134000	0.152473	1	0.861473	0.408358	0.370378	1
PfIT_130014300	protein phosphatase PPM6, putative	19.4776	22.0549	21.4927	19.3631	23.0542	23.1869	20.4928	22.4277	15.2683	20.6445	22.503	22.5086							7	7	7	10.2	10.2	10.2	96.592	0	10.086	1667300000	18	47638000	25551000	152490000	103280000	23602000	51643000	57369000	304830000	197460000	208040000	334210000	0	208840000	0.227797	1	0.859662	0.581923	0.285672	1
PfIT_110024200	conserved Plasmodium protein, unknown function	18.5363	19.4736	18.3123	18.1754	20.6694	20.0556	19.2639	20.1545	19.3317	16.7623	18.4641	19.8465							10	10	10	6.6	6.6	6.6	206.48	0	13.223	660380000	30	8359300	30033000	57511000	25715000	23387000	49731000	8781700	131750000	92204000	28567000	86095000	52125000	74479000	0.44479	1	0.859435	1.0351	0.821089	1
PfIT_070028300	conserved Plasmodium protein, unknown function	14.9502	18.7152	17.1535	14.6979	19.308	19.3786	13.4574	19.4681	13.6097	14.6057	17.4691	19.9916							6	6	6	8.4	8.4	8.4	125.11	0	8.8487	138260000	13	3950400	1108000	15062000	5102600	930210	393700	872600	22718000	25383000	6350600	23856000	0	36486000	0.170592	1	0.855187	0.451296	0.250407	1
PfIT_050034500	conserved Plasmodium protein, unknown function	20.4484	22.6901	21.1316	19.2931	24.3354	23.2052	21.023	23.9662	20.0755	21.7444	23.1226	22.9375							28	28	28	23.4	23.4	23.4	175.81	0	166.9	6171100000	122	82281000	107310000	507530000	172310000	48181000	159820000	263510000	1587700000	1229200000	684940000	725320000	82866000	602490000	0.197289	1	0.854579	0.513118	0.0687466	1
PfIT_040023000	regulator of chromosome condensation, putative	15.5183	22.8226	19.6954	17.732	20.9578	21.9082	19.1972	21.561	15.1894	20.1307	21.0046	21.4474							18	18	18	11.3	11.3	11.3	236.6	0	53.503	2405800000	45	24301000	0	734370000	84049000	21553000	59506000	113650000	201630000	306310000	208280000	389630000	3699100	283110000	0.127009	1	0.853927	0.346489	0.0878039	1
PfIT_100034000	pre-mRNA-splicing factor ATP-dependent RNA helicase PRP22, putative	18.4629	22.2746	18.7459	19.1055	22.107	20.8254	18.7849	21.7597	15.2641	20.9131	21.5781	19.9317							11	11	10	9.5	9.5	8.8	149.41	0	15.491	1492500000	31	22961000	23486000	329790000	28574000	36663000	29359000	128350000	293620000	230800000	203510000	120780000	2557800	65009000	0.220873	1	0.851489	0.566465	0.211888	1
PfIT_130061600	mitochondrial import inner membrane translocase subunit TIM23, putative	13.7422	22.0224	22.604	21.3086	18.1305	21.4794	21.5871	22.9871	23.4252	15.5551	22.8029	22.2669							2	2	2	13.2	13.2	13.2	18.171	0	4.3055	256240000	5	51249000	0	21299000	31874000	12987000	15752000	0	0	41569000	36587000	14619000	56322000	25233000	0.0995838	1	0.849979	0.277581	0.478082	1
PfIT_090008200	conserved Plasmodium protein, unknown function	23.2347	23.6717	24.6609	24.181	24.5515	25.3836	23.8577	24.8915	25.343	22.7414	24.0823	25.4762							46	46	46	47.2	47.2	47.2	155.17	0	323.31	19336000000	263	297470000	641600000	868570000	1724200000	1236300000	988040000	455770000	1598200000	2023000000	1154500000	2845300000	2766400000	3034000000	0.702359	1	0.849557	1.53982	0.620975	1
PfIT_060031300	protein DJ-1	17.681	23.9378	23.4244	20.8793	22.698	24.0103	21.6416	23.2747	22.7585	20.7	19.9059	24.4791							6	6	6	33.3	33.3	33.3	20.292	0	13.724	1095000000	24	99544000	0	176760000	123840000	21218000	35989000	18738000	74847000	111620000	10806000	185870000	78050000	257240000	0.142887	1	0.848173	0.385286	0.15957	1
PfIT_130074000	mitochondrial carrier protein, putative	17.4982	21.2664	19.1779	18.6969	22.1173	19.6548	19.5651	21.5042	18.0849	20.2396	20.3604	19.2945							5	5	5	10	10	10	66.969	0	6.9148	468960000	13	16171000	0	73151000	17200000	12323000	22494000	35902000	131940000	86260000	39036000	23938000	8063200	18648000	0.21999	1	0.842159	0.564488	0.0983038	1
PfIT_080009500	methionine aminopeptidase 1c, putative	16.1556	20.9548	18.7703	18.9293	20.4704	18.9843	14.6112	20.4259	13.9553	18.1631	20.5684	18.5111							3	3	3	3.5	3.5	3.5	88.456	0.0019317	3.282	309480000	11	8596800	0	73169000	16096000	17972000	0	10567000	52300000	50712000	55976000	18670000	571840	13449000	0.220326	1	0.834437	0.56524	0.390388	1
PfIT_130020900	CDP-diacylglycerol--inositol 3-phosphatidyltransferase	23.9178	26.1588	21.5784	22.8062	26.5443	24.8067	23.9426	26.0392	23.5393	25.6512	25.5499	24.4843							1	1	1	6.2	6.2	6.2	23.924	0.0036969	2.7752	3608000000	14	451010000	126790000	599350000	25052000	58673000	128980000	421580000	782960000	551640000	392970000	234770000	97528000	187750000	0.18658	1	0.834056	0.488512	0.151424	1
PfIT_130025300	golgi protein 1	17.6652	24.7136	21.2999	20.22	23.4285	22.525	18.1	23.5845	20.4518	21.5203	23.7424	22.6296							24	24	24	25.6	25.6	25.6	149.18	0	115.4	6153900000	98	86675000	14757000	1953400000	183300000	86713000	19947000	213560000	801570000	893100000	996430000	428510000	101830000	460740000	0.136563	1	0.831621	0.369926	0.0696315	1
PfIT_050029900	mitochondrial import receptor subunit TOM22, putative	14.6344	24.2711	24.1837	23.4116	18.1169	24.0401	23.8275	23.9781	23.2375	16.6145	17.3137	24.516							2	2	2	21.9	21.9	21.9	12.017	0.00065833	3.5464	665000000	7	133000000	0	101230000	95275000	55789000	74434000	0	0	82626000	0	86250000	49448000	119950000	0.0785373	1	0.826468	0.222849	0.34229	1
PfIT_020014700	60S ribosomal protein L37ae, putative	22.998	23.8966	27.503	23.8144	25.3116	27.7369	22.3195	25.6231	22.0764	23.7729	25.8822	26.2252							2	2	2	9.4	9.4	9.4	10.799	0.0019392	3.3688	2841000000	26	710250000	33507000	62467000	760860000	59008000	20936000	57335000	166580000	206730000	247390000	894700000	17690000	313790000	0.17401	1	0.821758	0.459304	0.336698	1
PfIT_090014600	helicase with Zn-finger motif, putative	13.9258	20.1272	18.7833	16.3902	19.7442	19.1236	16.6691	19.6317	12.9294	15.338	16.6101	18.9075							7	7	7	6	6	6	160.26	0	13.33	326630000	21	4600500	1104900	81306000	32033000	6098300	0	2940800	62351000	57676000	7101900	40554000	553850	34912000	0.139058	1	0.807225	0.376001	0.167767	1
PfIT_130069500	conserved Plasmodium protein, unknown function	24.5575	22.8451	24.0325	24.0539	24.7137	25.0754	22.8559	24.6362	25.0267	22.1223	23.6208	24.3133							35	35	35	25.2	25.2	25.2	207.12	0	323.31	14621000000	144	235830000	1530900000	467160000	1063900000	1079800000	470670000	283060000	1705900000	1616600000	799740000	2191900000	2119200000	1292400000	0.612396	1	0.8026	1.36454	0.161921	1
PfIT_130058700	conserved Plasmodium protein, unknown function	17.0603	20.8867	17.892	16.2999	22.3546	19.5883	15.0342	21.5613	13.752	17.749	20.3366	19.0398							14	14	14	8.1	8.1	8.1	248.26	0	39.936	1476400000	26	13545000	0	211320000	26513000	0	3657500	24011000	584580000	337310000	144330000	85917000	0	58746000	0.141302	1	0.801276	0.381449	0.273696	1
PfIT_040020400	RNA-binding protein, putative	16.575	21.6529	19.4503	18.5917	21.5055	19.9806	19.4853	21.339	20.397	19.3918	16.7644	18.8649							4	4	4	9	9	9	66.165	0	6.6897	401880000	11	14353000	0	92325000	20058000	11061000	20550000	19261000	83358000	74274000	0	28968000	38659000	13368000	0.179544	1	0.799873	0.472209	0.307746	1
PfIT_110008300	CCR4-NOT transcription complex subunit 1, putative	17.4122	19.8281	17.217	16.2175	20.99	19.6493	17.5882	20.0423	16.7612	19.6462	19.2258	19.3601							16	16	16	5.6	5.6	5.6	393.51	0	73.5	1152300000	44	7733200	25989000	138690000	22700000	11354000	29361000	122260000	310320000	160880000	91356000	122530000	16551000	100270000	0.184866	1	0.799832	0.48455	0.00553315	1
PfIT_110008600	syntaxin, Qa-SNARE family	16.8891	23.0669	20.5033	18.4173	22.0625	22.3626	19.7492	21.7378	17.8864	20.8321	18.4023	21.2937							3	3	3	11.8	11.8	11.8	41.388	0	54.208	441820000	14	29455000	0	131800000	22295000	5251100	13219000	28001000	65701000	52458000	0	80894000	3634400	38561000	0.133264	1	0.794387	0.361865	0.059454	1
PfIT_140027800	conserved Plasmodium protein, unknown function	22.816	17.8089	15.7543	17.9887	22.4067	18.3188	14.9719	17.7897	15.4822	22.0783	22.4542	18.424							3	3	3	3.1	3.1	3.1	150.02	0.0048048	2.5511	1497800000	4	24159000	457820000	0	3427000	16126000	0	274550000	344730000	0	356260000	20272000	2838000	21806000	0.111274	1	0.778336	0.307266	0.525671	1
PfIT_100005600	alpha/beta hydrolase, putative	14.6467	21.7314	20.5047	15.304	21.6049	22.3053	17.6193	21.9644	18.8792	17.1529	16.1185	22.1154							12	12	12	18.8	18.8	18.8	107.66	0	41.525	1100100000	35	22918000	0	167120000	71409000	1941800	9664100	6995300	153090000	196420000	3415000	248780000	23144000	218090000	0.0885403	1	0.777137	0.249078	0.0727485	1
PfIT_050020100	conserved Plasmodium protein, unknown function	14.2983	22.4634	20.0334	15.2793	22.0638	21.7831	16.5946	22.1015	18.1231	21.5357	22.1242	20.6783							3	3	3	8	8	8	51.785	0	10.219	780950000	14	28924000	0	156140000	28973000	0	0	82084000	118370000	121500000	123430000	97438000	7708200	45305000	0.083829	1	0.777064	0.236775	0.000899366	1
PfIT_060029900	oxidoreductase, short-chain dehydrogenase family, putative	16.1658	20.386	20.5963	18.5756	20.6285	20.2667	18.7919	19.9126	20.3254	17.0906	19.8254	21.4163							3	3	3	8.9	8.9	8.9	44.758	0	4.8462	241510000	12	12711000	0	26033000	30121000	7422900	8623200	0	30801000	18752000	17652000	23969000	24964000	53174000	0.187827	1	0.774262	0.49139	0.154963	1
PfIT_090040500	cytoadherence linked asexual protein 9	29.2598	29.6899	24.997	28.4446	29.1642	28.6518	25.6067	29.3087	24.964	26.9389	27.2143	27.3294							56	56	56	39.2	39.2	39.2	160.33	0	323.31	276900000000	492	4132800000	43067000000	58027000000	2243500000	24476000000	3423400000	8619600000	40306000000	44554000000	10433000000	28256000000	2192700000	11299000000	0.19583	1	0.771277	0.50978	0.268665	1
PfIT_090010500	conserved Plasmodium protein, unknown function	18.9443	17.7622	19.4543	18.5073	19.6389	20.3206	19.8169	20.1956	19.532	19.5032	19.2944	19.6296							7	7	7	8.1	8.1	8.1	139.69	0	10.416	492860000	14	8801000	28249000	0	40227000	20867000	51721000	41613000	45717000	67247000	36007000	73332000	42453000	45426000	0.454807	1	0.768639	1.05506	0.985066	1
PfIT_090010600	coatomer subunit beta, putative	16.5656	19.537	18.2219	17.3951	19.6778	19.5544	18.2575	19.4631	17.0365	19.4849	18.3996	18.8088							2	2	2	2.2	2.2	2.2	118.23	0.0058038	2.2186	265760000	5	5210900	0	38796000	15592000	8790700	15982000	37421000	42774000	36859000	0	39267000	6855800	23420000	0.270879	1	0.767605	0.676285	0.0444002	1
PfIT_030013400	pre-mRNA-processing factor 19, putative	15.806	23.7814	21.7155	18.6796	22.4654	22.4581	21.7758	23.9149	19.7431	22.6545	23.5765	22.8476							5	5	5	17.9	17.9	17.9	60.753	0	112.43	1765900000	36	76777000	0	331600000	79206000	9657300	82583000	151850000	133190000	363770000	287710000	132520000	20183000	173600000	0.102006	1	0.766725	0.283772	0.197907	1
PfIT_050010500	actin-like protein, putative	18.9979	21.7108	21.7094	19.7823	22.5548	22.3672	21.5118	22.2401	22.3252	21.717	21.6031	22.1849							11	11	11	25.3	25.3	25.3	66.439	0	26.279	1111400000	26	44457000	13088000	85810000	85724000	22542000	74755000	86178000	154030000	123840000	79639000	135250000	131370000	119190000	0.235578	1	0.762077	0.599194	0.577905	1
PfIT_070010900	importin-7, putative	15.6094	22.4175	21.6155	18.037	21.4926	22.3986	17.8515	20.5817	18.7503	19.3538	19.4682	22.5911							13	13	13	11.2	11.2	11.2	145.49	0	102.96	1734000000	46	27524000	0	352930000	202420000	16944000	14899000	42209000	185900000	98865000	45693000	348330000	27780000	398060000	0.10904	1	0.761916	0.301629	0.13144	1
PfIT_140075100	splicing factor U2AF large subunit, putative	14.2322	19.8332	18.163	15.417	19.3424	19.7265	15.5327	19.1279	14.5885	19.2451	19.1096	17.7099							2	2	2	2.5	2.5	2.5	97.355	0.0053444	2.4626	177690000	3	4802500	0	34560000	10859000	1618700	0	22992000	24594000	21197000	20930000	32096000	911560	7932600	0.127976	1	0.752486	0.348876	0.174139	1
PfIT_030012900	conserved Plasmodium protein, unknown function	16.4944	18.6209	16.9143	14.3649	19.4206	20.4501	13.8543	19.4332	17.8564	13.1716	14.7349	20.4665							9	9	9	5.7	5.7	5.7	198.49	0	10.515	460910000	14	4703200	0	0	12104000	0	1451400	904230	68773000	69373000	2672300	140390000	23256000	141990000	0.136424	1	0.73536	0.369586	0.0572331	1
PfIT_080018100	conserved Plasmodium protein, unknown function	15.6039	20.5253	15.9299	14.4255	20.2684	19.5705	18.4437	20.5465	19.3095	18.2791	16.6475	21.2542							5	5	5	9.5	9.5	9.5	78.448	0	8.684	313960000	14	8970200	0	52817000	2185000	0	12478000	11133000	44205000	53604000	0	27251000	22741000	87541000	0.109253	1	0.735145	0.30217	0.539506	1
PfIT_140074700	zinc finger protein, putative	15.2812	19.5871	14.8594	16.8236	18.8061	16.2793	15.3843	19.7812	14.5511	18.8066	18.9994	17.5191							4	4	4	5.7	5.7	5.7	99.659	0.00066313	3.6104	139330000	4	3317400	0	33078000	0	0	0	19258000	19251000	37843000	22011000	0	0	7889200	0.161187	1	0.727104	0.429113	0.000547974	1
PfIT_050011100	small ubiquitin-related modifier	23.063	26.4173	21.0311	21.568	26.6498	24.4566	22.5724	26.4497	22.3602	24.3418	26.0426	24.8417							4	4	4	46	46	46	11.06	0	11.402	2734100000	14	455680000	52577000	537700000	12857000	18654000	37423000	127580000	631760000	549930000	414730000	138140000	32302000	180400000	0.122375	1	0.721007	0.335021	0.0483678	1
PfIT_110027800	conserved Plasmodium protein, unknown function	19.4682	24.0623	21.1341	20.7686	23.097	22.9556	21.005	23.7792	21.5473	21.5205	23.47	23.2066							25	25	25	23.9	23.9	23.9	153.41	0	69.514	5748300000	104	83309000	50046000	1208700000	158810000	123260000	145200000	207570000	619060000	993340000	801700000	561250000	211460000	667940000	0.177239	1	0.718848	0.466842	0.128331	1
PfIT_030021300	kinetochore protein NUF2, putative	22.2579	22.2532	21.0076	20.6833	24.6855	22.3037	19.0666	25.2544	19.2674	21.0412	23.5341	22.3981							9	9	9	24.1	24.1	24.1	54.677	0	28.315	3103100000	32	107000000	145440000	144970000	61137000	48831000	15923000	62579000	782520000	1160700000	352260000	150130000	18300000	160290000	0.227628	1	0.717924	0.581548	0.112568	1
PfIT_100023100	eukaryotic translation initiation factor subunit eIF2A, putative	22.956	23.4702	24.5272	24.107	23.9653	25.0225	23.8999	24.3855	24.6313	23.054	23.7412	24.9601							69	69	69	33.3	33.3	33.3	275.43	0	323.31	24759000000	367	231390000	870630000	1243400000	2587100000	1933400000	1674800000	931840000	1752500000	2345200000	1500400000	3646700000	2780700000	3492400000	0.556065	1	0.713767	1.2546	0.570758	1
PfIT_090024400	regulator of chromosome condensation, putative	19.6826	21.3445	19.1421	18.9663	22.0782	21.2645	20.1367	22.2218	13.444	20.4684	21.4909	20.3902							24	24	24	12.7	12.7	12.7	397.48	0	67.431	3785900000	62	23370000	136330000	431360000	93729000	82977000	186760000	235040000	717310000	792400000	477440000	408100000	1805400	222620000	0.246763	1	0.713271	0.623836	0.20615	1
PfIT_140060200	glucose-6-phosphate dehydrogenase-6-phosphogluconolactonase	15.4925	18.6669	18.4199	15.3079	19.0496	20.3347	15.0478	18.0393	13.8291	18.9764	17.6722	19.8625							3	3	3	3.6	3.6	3.6	106.99	0	3.8065	225090000	9	4593800	0	20393000	17185000	0	0	25273000	26589000	13200000	10235000	64795000	713130	46711000	0.14359	1	0.70435	0.386989	0.512831	1
PfIT_100037100	early transcribed membrane protein 10.2	21.2696	25.9209	24.5139	23.1229	25.8192	24.871	24.6561	26.3121	22.7906	24.6065	25.3395	25.5447							11	11	11	45.1	45.1	45.1	38.925	0	220.49	6767900000	84	423000000	40449000	1016500000	383310000	146160000	423010000	408720000	947260000	1333100000	679320000	490970000	116080000	783120000	0.166961	1	0.70289	0.442758	0.148971	1
PfIT_040014200	replication protein A1, large subunit	18.8032	20.7335	16.7959	16.4449	21.3892	20.595	20.0701	20.7919	15.7394	20.6718	19.8158	20.9882							10	10	10	10.5	10.5	10.5	133.99	0	13.929	790820000	24	14379000	25159000	95889000	6258000	4906500	60544000	91875000	151060000	99847000	50761000	87117000	3008700	114400000	0.135031	1	0.698849	0.366186	0.0152643	1
PfIT_130057800	thioredoxin-related protein, putative	27.4667	27.1704	26.5115	26.5406	28.4393	28.2624	27.9611	28.8369	26.7753	29.089	28.7196	28.1375							6	6	6	30.8	30.8	30.8	23.988	0	15.833	27038000000	46	3379800000	1483900000	1208300000	765330000	780940000	2090400000	4568100000	2911900000	3835900000	3536300000	2575900000	918870000	2362100000	0.44957	1	0.697941	1.04463	0.54009	1
PfIT_080020800	vacuolar protein sorting-associated protein 9, putative	19.7178	20.8984	19.1526	18.1902	22.1476	21.517	18.978	21.5866	15.3733	20.922	19.6873	21.3852							13	13	13	7.8	7.8	7.8	213.93	0	26.194	1794300000	43	20624000	75019000	170040000	50701000	26020000	44924000	172850000	404210000	274000000	73452000	261090000	3692600	238290000	0.201368	1	0.695341	0.522424	0.273367	1
PfIT_110044600	conserved Plasmodium protein, unknown function	15.5202	22.4692	17.3831	15.7876	20.6775	20.9884	23.2167	23.2253	21.4606	22.3352	21.0128	21.962							2	2	2	18	18	18	18.602	0	8.9382	130490000	6	43497000	0	17419000	0	0	29244000	15874000	5031100	29419000	6347500	6241000	8658100	12256000	0.0925275	1	0.693634	0.259422	0.902991	1
PfIT_020021600	ATP synthase F1, alpha subunit	18.7041	21.9649	21.7531	18.5459	24.929	21.0237	20.0929	21.4686	23.3801	18.8482	21.6635	22.6768							10	10	10	18.3	18.3	18.3	61.77	0	14.257	2106400000	29	67948000	13239000	126900000	109570000	11864000	34666000	14630000	990210000	89959000	102970000	66090000	338410000	207860000	0.117972	1	0.692128	0.324062	0.23195	1
PfIT_070035200	erythrocyte binding antigen-175	15.3246	16.5452	19.1864	17.4848	17.3995	18.2443	18.1426	19.1226	13.8032	15.9905	20.3558	19.4045							3	3	3	2.3	2.3	2.3	174.61	0	3.7911	324780000	8	4009600	0	7746400	48323000	14857000	23440000	5273600	14004000	46235000	108690000	0	0	56211000	0.231421	1	0.69078	0.589981	0.000667279	1
PfIT_140065000	conserved Plasmodium protein, unknown function	14.0271	17.8256	17.9618	15.0532	19.9792	16.8185	17.87	18.5627	16.1889	18.5009	18.9103	15.9569							2	2	2	1.9	1.9	1.9	139.64	0.003757	2.9342	161120000	3	2598700	0	0	0	0	14852000	23000000	64082000	24005000	30546000	0	4631800	0	0.128868	1	0.67884	0.351071	0.252666	1
PfIT_140016000	conserved Plasmodium membrane protein, unknown function	24.0759	21.7536	20.4621	21.2306	23.5436	23.5384	22.1259	23.578	23.0724	23.0709	23.3151	24.2492							5	5	5	25.2	25.2	25.2	30.538	0	13.139	1261000000	21	114640000	194520000	38893000	15889000	27068000	50344000	96923000	134490000	137740000	114790000	134010000	97026000	219340000	0.198131	1	0.673669	0.515041	0.294443	1
PfIT_130029000	glideosome associated protein with multiple membrane spans 1	22.0592	24.0115	22.1056	21.8455	24.0003	24.3507	24.0478	25.0255	22.5959	24.8631	24.0502	24.6091							1	1	1	5.3	5.3	5.3	33.979	0	4.7242	1592400000	16	199050000	34961000	135290000	36102000	30146000	138740000	244130000	134250000	273220000	138970000	171150000	50716000	204730000	0.265408	1	0.673409	0.664463	0.538046	1
PfIT_080007400	transcription factor with AP2 domain(s)	16.06	21.1172	15.6584	15.9652	20.489	18.4014	14.4729	20.218	14.1335	18.1989	18.8692	18.6607							10	10	10	4.4	4.4	4.4	298.76	0	16.094	668820000	15	6622000	0	229740000	5223600	6461500	0	30389000	148640000	123180000	48362000	34970000	0	41856000	0.111373	1	0.673314	0.307515	0.194186	1
PfIT_110028400	beige/BEACH domain protein, putative	14.8787	19.6564	19.3526	14.959	20.9893	19.9503	17.54	20.9343	15.9038	18.8179	20.0054	19.7966							7	7	7	4.4	4.4	4.4	196.28	0	10.289	718680000	24	9333500	2319700	63627000	51548000	2452400	14674000	35584000	160290000	154290000	81039000	78009000	4720600	70124000	0.0994184	1	0.670328	0.277158	0.0255852	1
PfIT_050013700	guanidine nucleotide exchange factor	16.0822	18.6196	13.4167	14.5782	18.2265	17.3218	14.0586	18.7826	13.2669	17.3189	16.3606	17.4309							4	4	4	1.9	1.9	1.9	305.58	0	5.5054	186640000	6	1623000	0	46319000	1257500	0	1962300	0	35272000	51859000	9676400	18840000	1133500	20320000	0.132448	1	0.669338	0.359864	0.105744	1
PfIT_100032300	rRNA-processing protein EBP2, putative	15.9736	22.232	20.9439	18.1077	21.1402	21.9048	16.9286	22.0567	12.3162	16.8537	16.9329	21.9366							4	4	4	16.5	16.5	16.5	37.727	0	6.1485	262080000	9	21840000	0	59113000	24206000	3389700	0	0	27734000	52350000	0	47118000	0	48169000	0.108035	1	0.667778	0.299089	0.31473	1
PfIT_120042100	conserved Plasmodium protein, unknown function	16.3734	21.2429	20.5167	16.713	22.0494	21.3733	17.6275	21.8324	17.4551	16.8027	20.7222	20.9882							16	16	16	11.3	11.3	11.3	219.63	0	105.73	1705000000	32	19157000	7555900	220870000	133520000	9561500	18022000	0	386300000	332360000	153960000	241760000	15991000	185120000	0.106491	1	0.667545	0.29518	0.0679738	1
PfIT_110022600	insulinase, putative	14.9408	14.6687	17.8493	15.0187	15.3002	19.1194	14.2666	14.989	16.969	14.5272	15.5076	15.9808							4	4	4	2.6	2.6	2.6	167.11	0	4.617	90327000	11	1220600	0	1927300	17474000	2456500	1458500	1747200	2985800	2406300	3447400	42145000	9493500	4785600	0.147075	1	0.65986	0.395399	0.114983	1
PfIT_050023700	ATP-dependent RNA helicase DDX23, putative	19.7113	22.5511	21.8392	20.6729	22.285	23.1192	21.4777	21.9924	18.1235	21.6254	21.5005	22.3798							18	18	18	20	20	20	129.87	0	25.492	2649800000	57	45687000	49789000	356440000	217610000	96961000	169380000	187640000	296400000	241990000	172080000	528460000	16563000	316530000	0.231681	1	0.658477	0.590559	0.219663	1
PfIT_030006900	serine/threonine protein kinase	14.9828	20.2706	18.6405	14.5346	20.5522	20.778	17.7007	20.9044	14.283	19.0352	19.5573	16.7129							9	9	9	8.7	8.7	8.7	157.42	0	77.79	562470000	14	8653400	2104700	82221000	26563000	0	13847000	34921000	99943000	127580000	50147000	116870000	1295800	6982300	0.0909159	1	0.656956	0.255249	0.0464483	1
PfIT_120050800	conserved Plasmodium protein, unknown function	14.5046	22.2298	18.6299	15.8426	21.1273	20.361	14.288	21.8267	16.6001	19.9488	21.4898	20.915							3	3	3	6.7	6.7	6.7	56.208	0	4.8497	505290000	6	18714000	0	132800000	10952000	0	0	27323000	61846000	100430000	79513000	36360000	2682300	53382000	0.0836268	1	0.655527	0.236245	0.100505	1
PfIT_060023200	cell division cycle protein 48 homologue, putative	18.709	23.898	22.7474	20.2099	23.2002	23.8933	21.0323	23.572	23.1296	20.6045	22.7722	24.25							22	22	22	28.9	28.9	28.9	92.386	0	87.668	5203700000	73	102030000	21855000	797210000	359110000	61853000	109380000	81307000	491500000	635960000	365340000	794660000	468040000	1017500000	0.122508	1	0.649637	0.335354	0.170587	1
PfIT_120051500	conserved Plasmodium protein, unknown function	18.106	21.7809	21.1567	18.1152	22.014	22.8511	20.4062	20.3355	18.6173	21.1819	21.1282	21.8752							8	8	8	9	9	9	104.01	0	33.22	1137700000	41	29941000	10721000	136930000	88832000	10790000	52803000	90397000	160940000	50279000	87099000	287500000	15281000	146170000	0.128097	1	0.645584	0.349174	0.16565	1
PfIT_120040400	mRNA methyltransferase, putative	17.8777	19.6141	19.4006	18.1309	20.9218	19.7553	15.2016	19.9654	16.8518	20.151	15.4716	20.1837							3	3	3	4.9	4.9	4.9	75.165	0	26.12	195610000	9	8150500	0	19260000	16611000	6889300	0	27944000	47676000	24568000	0	21239000	2838700	28585000	0.26048	1	0.638489	0.653778	0.468956	1
PfIT_050023400	SWIB/MDM2 domain-containing protein, putative	15.3726	24.2019	22.235	18.7441	23.2148	21.7503	19.411	23.8076	17.8235	15.5343	22.2866	22.0415							2	2	2	18.3	18.3	18.3	15.496	0.0025284	3.0399	440860000	8	62980000	0	135080000	34553000	3073500	4879700	0	68148000	102780000	35812000	24693000	1623600	30218000	0.0745721	1	0.633242	0.212338	0.0266443	1
PfIT_120017900	glycerol-3-phosphate 1-O-acyltransferase	14.0452	21.3391	21.0268	19.5144	16.9448	21.8421	19.7558	20.5621	20.9083	20.2625	20.2599	20.7328							3	3	3	4.6	4.6	4.6	66.917	0.0031447	2.9835	448880000	8	17955000	0	66321000	53413000	18722000	22132000	31445000	0	38702000	31390000	93990000	49200000	43566000	0.0803088	1	0.630092	0.227524	0.266708	1
PfIT_070007400	Plasmodium exported protein, unknown function	23.7875	24.6733	25.248	24.9306	25.3064	25.3608	25.3774	26.7044	25.3124	23.3935	25.4421	25.547							10	10	10	44.3	44.3	44.3	27.731	0	233.08	6472400000	77	497880000	188230000	347800000	518010000	415730000	566650000	143250000	539440000	1421600000	592600000	560140000	541670000	637340000	0.63705	1	0.62972	1.41257	0.923677	1
PfIT_120014300	protein phosphatase, putative	18.5729	21.048	17.6646	17.8763	21.5325	19.762	17.1372	20.6609	14.0464	19.7465	19.6273	19.5701							10	10	10	7.6	7.6	7.6	166.75	0	14.784	818750000	18	11216000	28466000	158270000	15167000	17564000	10523000	64212000	221430000	121030000	59121000	64906000	1235100	56821000	0.161531	1	0.628411	0.429928	0.348041	1
PfIT_100033900	transcription elongation factor SPT4, putative	23.5907	25.2423	21.3759	22.4797	25.0091	24.5938	23.4589	25.6676	21.283	23.8607	24.6046	23.5862							4	4	4	33.1	33.1	33.1	15.178	0	47.548	1684900000	16	240700000	88431000	277840000	19049000	40942000	80709000	106630000	236360000	373080000	178580000	177240000	17862000	88158000	0.173013	1	0.624549	0.45697	0.0130746	1
PfIT_110032500	conserved Plasmodium protein, unknown function	21.8025	21.487	20.669	20.604	23.4144	21.8119	21.5314	23.1264	16.8904	23.4589	22.8572	22.054							16	16	16	9.5	9.5	9.5	212.05	0	36.036	4780500000	52	60512000	288950000	232200000	131710000	125910000	239450000	910900000	883230000	723390000	600270000	290850000	9597000	344000000	0.285679	1	0.623968	0.708054	0.158487	1
PfIT_120007800	mitochondrial phosphate carrier protein	22.268	24.2555	24.6543	23.3911	24.6644	24.8972	23.5388	24.853	25.5174	23.5596	24.71	25.6739							10	10	10	29.3	29.3	29.3	36.801	0	26.613	5475300000	71	304180000	90907000	360500000	475290000	198020000	219370000	222550000	478640000	545450000	494000000	562450000	864530000	963570000	0.271215	1	0.591664	0.67701	0.411883	1
PfIT_130058800	Ran-binding protein, putative	14.6275	15.0161	17.6315	15.7888	15.6071	17.6524	15.7425	19.6206	14.5266	15.1552	19.3606	19.0762							4	4	4	3.7	3.7	3.7	138.29	0	6.7346	170630000	10	2666100	1619900	2120700	12995000	3623200	0	2335300	3194400	51591000	43081000	13184000	1510600	35375000	0.198155	1	0.591103	0.515096	0.18443	1
PfIT_040016600	conserved Plasmodium protein, unknown function	14.7914	20.3976	19.9032	15.4161	22.4455	19.0003	13.8244	22.6193	14.7486	15.2769	20.1828	20.8881							6	6	6	12.5	12.5	12.5	90.833	0	9.8902	712980000	17	18281000	1105900	53870000	38240000	0	565740	1548400	222750000	251270000	46416000	20451000	1073600	75683000	0.0766576	1	0.589857	0.217875	0.145668	1
PfIT_130047200	V-type proton ATPase subunit D, putative	19.6907	21.8275	21.7103	20.8356	21.6262	22.5342	20.8395	21.818	22.4697	21.3051	20.1345	23.0624							6	6	6	25.1	25.1	25.1	27.801	0	8.4208	645960000	22	43064000	12693000	55822000	51469000	28070000	28146000	38866000	48553000	55457000	17265000	91107000	87123000	131390000	0.278862	1	0.589169	0.693458	0.307109	1
PfIT_030008300	spindle pole body protein, putative	18.6583	20.1006	19.3085	16.7879	22.082	20.9609	18.6525	21.1133	15.2788	18.2119	20.9783	19.8807							10	10	10	5.9	5.9	5.9	267.96	0	17.317	1528100000	24	14836000	42613000	115800000	66875000	11655000	42443000	31271000	457270000	233660000	212780000	210230000	4094500	99431000	0.12977	1	0.587814	0.353292	0.226246	1
PfIT_140061700	conserved Plasmodium protein, unknown function	23.5612	24.6044	25.1016	22.8894	25.6379	26.4957	24.694	27.0148	22.8402	25.8477	26.0814	25.9145							14	14	14	35.7	35.7	35.7	69.282	0	129.47	14241000000	65	593390000	297040000	612190000	864040000	186480000	651380000	1449300000	1253100000	3254400000	1704100000	2271000000	180220000	1518000000	0.190096	1	0.585316	0.496619	0.120831	1
PfIT_110036800	T-complex protein 1 subunit alpha	21.3107	23.2223	24.1156	22.5227	23.4956	24.3731	21.4985	22.8896	23.9086	15.4995	22.5986	24.4939							21	21	21	49.8	49.8	49.8	60.26	0	108.25	4304500000	70	126600000	88439000	332720000	618010000	204880000	100730000	0	402100000	264190000	215950000	738790000	535390000	803330000	0.23136	1	0.580936	0.589844	0.0367184	1
PfIT_130041300	conserved Plasmodium protein, unknown function	20.6271	23.0119	24.458	23.0942	22.9249	23.82	22.1993	23.4847	24.3891	16.0095	23.376	24.6242							12	12	12	39.1	39.1	39.1	47.029	0	125.84	2942600000	45	140120000	34010000	177620000	483960000	188050000	101130000	0	167220000	246510000	228610000	311000000	461400000	543060000	0.193694	1	0.580688	0.504886	0.197071	1
PfIT_130057000	inner membrane complex protein 1f, putative	20.3439	23.0034	22.5656	19.1559	24.3212	24.1592	22.4877	24.8152	21.301	23.4059	23.6526	24.1834							34	34	34	31.5	31.5	31.5	151.57	0	189.33	8804200000	150	137570000	85173000	538140000	397270000	37383000	376400000	711330000	1341500000	1889300000	843950000	1199100000	165350000	1219400000	0.110301	1	0.574499	0.304814	0.272325	1
PfIT_090026600	ubiquitin-like protein, putative	22.6725	24.9832	22.8975	22.93	25.1108	24.2246	22.6351	24.5223	20.3254	23.7057	24.2349	23.5538							16	16	16	14.1	14.1	14.1	181.92	0	130.6	9836100000	102	189160000	347630000	1724700000	406300000	415560000	338730000	711400000	1884000000	1253000000	1026700000	1019400000	68323000	640350000	0.23053	1	0.570714	0.588002	0.29185	1
PfIT_030008900	inner membrane complex protein 1e, putative	20.552	21.7747	22.2775	18.1498	23.7335	24.4297	21.1458	26.6587	19.1909	21.9154	23.921	23.9677							12	12	11	27	27	25.5	61.73	0	52.283	5188000000	62	192150000	41508000	96877000	137260000	7852500	62642000	106790000	376580000	2860300000	428850000	610150000	16158000	442950000	0.0995583	1	0.56958	0.277516	0.127408	1
PfIT_060032100	choline/ethanolaminephosphotransferase, putative	20.2893	22.4626	23.5579	21.8705	21.4952	24.6432	20.9551	21.9504	21.6737	22.3421	22.6447	24.3021							3	3	3	6.4	6.4	6.4	45.081	0.0037014	2.7783	1604700000	15	94393000	21783000	98256000	209940000	65181000	34559000	90385000	50251000	68892000	111470000	445450000	56868000	351640000	0.153173	1	0.56639	0.410031	0.224176	1
PfIT_010012100	photosensitized INA-labeled protein PHIL1, putative	17.1056	23.7722	21.3592	19.9356	19.4722	24.5161	14.8793	20.0246	19.6163	17.2612	20.0047	23.7992							3	3	3	17.4	17.4	17.4	25.477	0	7.8955	602600000	16	60260000	0	143270000	26901000	10028000	0	0	7273100	10666000	10520000	239920000	8037000	145970000	0.0783858	1	0.562255	0.222449	0.430763	1
PfIT_120019100	proline--tRNA ligase	18.9601	21.5436	21.1525	19.7771	21.7351	21.8265	19.1222	21.268	21.9128	18.9207	20.9468	22.3441							9	9	9	13.8	13.8	13.8	86.66	0	17.165	1300100000	28	28892000	22949000	137560000	104890000	40431000	25679000	22331000	157080000	113640000	90955000	167360000	177670000	239590000	0.207539	1	0.560855	0.536439	0.064393	1
PfIT_110039400	coatomer subunit delta	20.3307	21.8208	23.7051	21.5458	22.0729	23.9178	21.7362	21.2315	22.8196	22.2529	21.6885	23.9817							11	11	11	22.6	22.6	22.6	56.839	0	30.562	2008100000	56	80322000	32969000	92610000	341900000	76537000	87338000	124950000	110290000	61553000	84495000	396210000	185060000	414140000	0.175071	1	0.559946	0.461783	0.00700897	1
PfIT_140069200	glyceraldehyde-3-phosphate dehydrogenase	26.0466	26.745	27.4881	26.8812	26.8037	28.2632	26.2858	26.6918	27.4468	26.2026	27.078	28.2793							18	18	18	55.8	55.8	55.8	36.635	0	323.31	40717000000	151	1850800000	1524900000	2474400000	4141600000	2719300000	1799800000	1699000000	2577000000	2384800000	3116700000	7087800000	4024700000	7166900000	0.368756	1	0.556154	0.881558	0.0302011	1
PfIT_130064100	HVA22-like protein, putative	22.449	23.5412	24.3723	22.8231	24.334	24.8686	22.9745	24.0343	22.4903	22.3902	23.7632	24.2653							4	4	4	17	17	17	18.422	0	5.7093	1360500000	18	170060000	45804000	97657000	173740000	59364000	65932000	43977000	169180000	137450000	113900000	245060000	47136000	161310000	0.267824	1	0.554397	0.669691	0.148933	1
PfIT_140016200	conserved Plasmodium protein, unknown function	22.9071	23.7395	22.4965	22.4813	24.6247	23.6961	23.3813	24.5743	21.2497	23.464	23.5427	23.3498							16	16	16	29.4	29.4	29.4	91.878	0	176.17	5109400000	56	145980000	275300000	490220000	207110000	204930000	382390000	405000000	905370000	874300000	427700000	475700000	87273000	374140000	0.313829	1	0.552966	0.767691	0.00653845	1
PfIT_130013000	tripartite motif protein, putative	16.3241	17.7747	19.6525	14.1346	20.7294	20.5439	17.7547	22.4612	15.4789	20.3708	19.2857	20.6199							7	7	7	9.8	9.8	9.8	105.26	0	15.299	673200000	18	13739000	0	0	40382000	0	10836000	66440000	85187000	282940000	31317000	74906000	2237800	78957000	0.0822969	1	0.552199	0.232755	0.102616	1
PfIT_100007100	conserved Plasmodium protein, unknown function	22.3564	23.4584	24.0324	22.8227	23.8988	24.7773	22.8505	22.4601	24.3492	22.2291	22.9504	24.8169							6	6	6	33.9	33.9	33.9	14.517	0	12.625	1305200000	28	163150000	42956000	92211000	137270000	59347000	60505000	39331000	125130000	46159000	64840000	230030000	170970000	236430000	0.298273	1	0.550547	0.734857	0.0276847	1
PfIT_030007800	N-ethylmaleimide-sensitive fusion protein	24.1525	25.4846	23.1849	25.0315	25.5286	23.9066	23.6048	24.9014	22.2105	23.8403	24.4754	24.0109							26	26	26	44.6	44.6	44.6	89.115	0	201.67	13888000000	102	277750000	932410000	2347500000	476780000	1714800000	637840000	750970000	2420100000	1566900000	1166300000	786310000	242670000	845190000	0.266812	1	0.548244	0.667503	0.275145	1
PfIT_050023100	zinc finger protein, putative	16.1155	18.8475	19.2653	13.6164	21.6393	20.6086	20.122	22.5928	14.181	20.8528	21.5773	19.2583							3	3	3	7.1	7.1	7.1	65.057	0	4.6065	496170000	12	19084000	0	12264000	16383000	0	29670000	49235000	84929000	164470000	81355000	41569000	0	16304000	0.0704974	1	0.545324	0.201467	0.120846	1
PfIT_080011600	DnaJ protein, putative	18.8232	18.7538	17.1843	18.0804	19.1255	19.1794	14.5072	18.5206	15.673	18.5008	20.3369	19.9569							2	2	2	3.7	3.7	3.7	77.174	0	4.2451	119500000	4	4267800	12987000	12377000	4170100	7760400	0	0	0	0	37084000	16624000	0	28496000	0.34904	1	0.541327	0.841024	0.70559	1
PfIT_120011200	high mobility group protein B3, putative	19.166	22.6731	21.6448	20.1556	22.4869	22.4623	20.8825	22.0794	21.7914	20.7915	21.1458	22.3311							26	26	26	13.6	13.6	13.6	265.18	0	323.31	3636800000	115	42785000	49997000	568450000	278720000	99276000	164320000	154260000	499630000	376680000	197210000	491200000	308530000	448490000	0.155986	1	0.54033	0.416748	0.142406	1
PfIT_130012000	U1 small nuclear ribonucleoprotein A, putative	20.2713	21.8858	21.8656	20.3896	22.688	22.5532	14.4482	23.3499	21.2298	22.0464	21.431	21.8676							6	6	6	18.9	18.9	18.9	51.938	0	10.337	852890000	17	47383000	22780000	69753000	68783000	24727000	0	77963000	121630000	192440000	50891000	110780000	44266000	68879000	0.229021	1	0.536031	0.584648	0.239675	1
PfIT_060005700	conserved Plasmodium protein, unknown function	15.7322	19.9418	19.5035	18.1562	18.2391	20.3847	18.7975	19.9221	20.323	19.2899	20.4206	19.8511							2	2	2	24.2	24.2	24.2	14.725	0	4.4057	37888000	3	9472000	0	4028500	2973100	1168500	1822500	2564000	1237600	3973900	5613900	5476200	5246900	3782900	0.128797	1	0.534163	0.350898	0.383891	1
PfIT_140008800	26S proteasome regulatory subunit RPN6	14.5601	21.8579	23.0286	17.0412	20.4766	23.5295	15.728	19.2915	20.7505	15.0872	19.956	21.1937							8	8	8	14	14	14	77.339	0	21.103	1083900000	20	31880000	0	129230000	290920000	4585600	0	0	49611000	21817000	34580000	411660000	59981000	81551000	0.0568162	1	0.533585	0.164423	0.150268	1
PfIT_020016600	conserved Plasmodium protein, unknown function	21.5126	23.9009	22.6879	21.3835	24.4888	23.8209	21.5945	23.7367	22.2457	20.5428	22.7665	23.3074							32	32	32	23.9	23.9	23.9	215.46	0	123.27	7106400000	133	107670000	197460000	1033800000	445940000	180560000	209000000	100820000	1553800000	922550000	470910000	978080000	328220000	685170000	0.171748	1	0.530608	0.454006	0.0649978	1
PfIT_130064800	CUGBP Elav-like family member 1	23.6415	24.9071	24.3153	25.0527	24.7559	24.6409	25.7306	23.9717	22.3367	25.3239	25.9744	23.9193							8	8	8	21	21	21	57.114	0	79.37	7474700000	51	355940000	274810000	660700000	438380000	730880000	1169200000	881990000	594940000	345470000	1384500000	549370000	111230000	333140000	0.615466	1	0.528529	1.37052	0.0938742	1
PfIT_070024100	conserved Plasmodium membrane protein, unknown function	14.5641	20.4821	17.9703	15.8199	19.9967	18.7752	15.3417	20.3256	11.9635	19.2322	19.4765	19.5444							14	14	14	4.2	4.2	4.2	399.55	0	21.613	1035900000	31	6726400	3730500	225550000	39549000	8908200	0	94843000	161110000	202380000	112340000	69090000	615050	117750000	0.0881778	1	0.525085	0.248135	0.23767	1
PfIT_070028000	conserved Plasmodium protein, unknown function	17.7031	23.184	20.6303	17.5431	23.3269	22.2165	19.4909	22.8624	19.9673	19.9142	21.8965	22.5847							27	27	27	13.3	13.3	13.3	266.08	0	113.36	5084900000	89	47523000	22832000	1019700000	173680000	20435000	78839000	105720000	1125800000	815950000	417730000	521460000	109690000	673070000	0.0774885	1	0.523004	0.220076	0.0482503	1
PfIT_130072200	conserved Plasmodium protein, unknown function	23.5347	22.9522	22.6518	22.3976	24.0324	24.2711	24.1562	24.7686	19.7905	24.1598	24.2397	24.0279							14	14	14	22.7	22.7	22.7	77.81	0	158.73	5208700000	96	173620000	364550000	243450000	197690000	165760000	560880000	562250000	514730000	857420000	594280000	607370000	27205000	513160000	0.333885	1	0.520819	0.809619	0.0298946	1
PfIT_140052900	conserved Plasmodium protein, unknown function	22.0054	21.4542	22.494	22.5777	22.418	22.509	21.931	23.0121	22.7853	21.355	22.3873	22.7416							60	60	60	26.2	26.2	26.2	345.86	0	276.89	9853500000	213	65690000	631490000	430990000	886050000	938990000	599760000	402330000	840600000	1268900000	822880000	895320000	1084300000	1051900000	0.785002	1	0.517056	1.70154	0.593519	1
PfIT_130037500	conserved Plasmodium protein, unknown function	20.7948	23.3083	21.5083	20.0487	23.5933	23.4977	21.9122	24.1175	19.5537	23.4428	23.3215	23.353							14	14	14	16.5	16.5	16.5	113.55	0	210.14	4718200000	69	96290000	89134000	508980000	146170000	53147000	193380000	558710000	620120000	891860000	513650000	580370000	37710000	524980000	0.135686	1	0.509434	0.367786	0.00200974	1
PfIT_110024300	conserved Plasmodium protein, unknown function	19.6821	20.29	21.1694	19.3709	21.1724	22.1109	20.2285	20.5458	18.5038	21.6949	18.7438	22.3726							13	13	13	25.8	25.8	25.8	136.35	0	20.043	1246800000	27	24447000	42901000	65380000	120280000	34576000	62653000	173140000	120530000	78067000	22388000	230990000	18957000	276950000	0.214685	1	0.50424	0.552574	0.33379	1
PfIT_010010800	lipid/sterol:H+ symporter	15.8511	19.3097	17.0824	15.7852	19.7253	18.2394	14.4394	19.1378	16.2056	19.339	19.3692	17.1669							3	3	3	2.3	2.3	2.3	169.69	0	4.8844	220130000	6	3795300	0	37689000	8049500	0	0	38463000	50274000	33457000	39276000	0	4383300	8534700	0.11956	1	0.50222	0.328023	0.183524	1
PfIT_140073200	rhoptry protein, putative	16.8724	20.9245	18.673	17.412	20.4028	20.1529	18.8447	20.8557	16.4476	19.1302	20.3537	20.5933							12	12	12	8.5	8.5	8.5	163.47	0	27.591	874220000	38	11208000	9358700	155230000	32601000	13602000	36720000	44758000	108130000	148010000	104510000	90934000	6971500	123390000	0.120269	1	0.499244	0.329787	0.0206586	1
PfIT_010014500	UMP-CMP kinase, putative	15.6196	21.6984	21.4405	19.3285	18.5725	22.3273	19.2118	20.4243	17.5369	15.0577	19.9936	22.6353							4	4	4	10	10	10	44.293	0	3.8226	460590000	8	21933000	0	71462000	59767000	13825000	12751000	0	0	29549000	21922000	110510000	3993300	136810000	0.0751032	1	0.489932	0.21375	0.087112	1
PfIT_080031900	ATP-dependent RNA helicase DBP10, putative	18.4476	21.3749	20.6161	18.8533	21.4639	21.5823	18.0876	20.7202	15.0582	16.0431	20.3992	19.865							9	9	9	7.9	7.9	7.9	150.1	0	16.305	884810000	30	15255000	20735000	157730000	93220000	27468000	0	0	167770000	100190000	80204000	182110000	0	55383000	0.144655	1	0.486947	0.389562	0.51819	1
PfIT_110040400	3-oxo-5-alpha-steroid 4-dehydrogenase, putative	21.2295	24.1954	23.2925	21.7545	24.525	23.891	22.0906	24.1621	19.6301	23.5181	23.5681	23.6914							8	8	8	18.9	18.9	18.9	35.467	0	14.465	2195600000	40	137230000	39340000	307360000	164380000	56609000	71460000	192210000	386280000	300360000	198990000	248900000	12982000	216740000	0.148635	1	0.484394	0.399151	0.235599	1
PfIT_140075500	shewanella-like protein phosphatase 1, putative	22.5315	25.5974	23.1602	21.2192	26.201	25.3111	22.6789	26.3615	22.0064	25.291	26.1839	24.3969							10	10	10	30.7	30.7	30.7	42.266	0	85.256	5935100000	61	423930000	84874000	710770000	131230000	34178000	94009000	574750000	1080000000	1207000000	1067200000	582790000	58982000	309260000	0.095696	1	0.480723	0.267599	0.0162815	1
PfIT_110023700	ubiquitin-protein ligase, putative	15.727	19.5745	16.5251	15.8917	19.5596	17.8124	16.3448	17.7609	16.5107	17.0583	16.3402	17.7436							4	4	4	2	2	2	251.89	0	5.4472	279430000	10	2686800	5640900	81196000	9808300	0	8655700	14194000	80363000	23099000	0	23939000	9711000	22824000	0.109652	1	0.479008	0.303176	0.116958	1
PfIT_080027600	protein transport protein SEC23	14.5148	21.653	19.5694	15.7978	20.0208	21.3406	18.0526	20.3016	17.0591	21.1825	19.0796	20.7764							5	5	5	7.5	7.5	7.5	86.156	0	8.4974	540580000	10	14226000	0	125310000	29564000	0	10331000	90437000	40425000	49111000	21053000	100910000	5189000	68247000	0.060908	1	0.473961	0.175593	0.015387	1
PfIT_110020400	serine esterase, putative	14.9986	22.142	18.3284	15.6671	21.5251	19.6971	17.7653	21.6506	16.5344	19.0641	18.619	19.4504							16	16	16	10.7	10.7	10.7	215.75	0	38.024	1396100000	39	14102000	0	458180000	32587000	0	22055000	54262000	298760000	325920000	39858000	84147000	9396900	70922000	0.0609793	1	0.473423	0.175787	0.0207547	1
PfIT_020023200	pre-mRNA-processing protein 45, putative	15.4123	19.8399	18.3397	16.0622	20.2369	18.7127	19.2736	20.4033	13.6138	18.0569	20.3285	20.5827							2	2	2	3.9	3.9	3.9	57.525	0.0057604	2.1472	169100000	4	7686300	0	20645000	7298500	0	13943000	5999100	27186000	30511000	28967000	0	0	34549000	0.0948847	1	0.473308	0.265509	0.0134371	1
PfIT_110033000	conserved protein, unknown function	15.4019	21.1577	16.4637	16.5152	20.5031	17.4242	15.0564	20.4785	13.3475	19.8065	20.2489	16.1658							2	2	2	3.2	3.2	3.2	84.193	0.0036254	2.6242	280790000	4	7799700	0	84219000	3253600	0	0	33010000	53500000	52598000	44856000	6331600	375220	2646700	0.0778292	1	0.473084	0.220977	0.189777	1
PfIT_140046900	allantoicase, putative	16.5804	21.6448	21.7626	17.565	21.8145	22.014	18.0047	22.8253	16.4169	17.2802	21.7534	21.0331							8	8	8	13.9	13.9	13.9	64.798	0	9.3419	732020000	15	28155000	0	85254000	92505000	5041400	0	0	95893000	193230000	91918000	110110000	2274900	55790000	0.0733372	1	0.468513	0.209051	0.130395	1
PfIT_140061900	AP-1 complex subunit gamma, putative	14.655	20.9843	18.735	17.0414	19.0841	19.65	18.2508	18.7586	16.4583	20.0339	19.1146	20.222							4	4	4	5.1	5.1	5.1	124.23	0	24.799	386680000	11	7733700	0	103720000	21815000	6744300	15595000	53676000	27787000	22175000	28382000	41135000	4501900	61151000	0.0819474	1	0.467079	0.231837	0.052543	1
PfIT_090009600	copper-transporting ATPase	18.9141	22.4726	19.8455	18.1952	22.5669	21.871	20.0936	22.1275	19.5599	21.3642	21.7662	21.9325							23	23	23	10	10	10	299.39	0	76.699	3984300000	62	34347000	57300000	675120000	109280000	34815000	129790000	313130000	720720000	531500000	413750000	444920000	89653000	464320000	0.0969269	1	0.466974	0.270766	0.0474013	1
PfIT_080007100	mannose-6-phosphate isomerase, putative	18.278	21.2892	18.5588	17.2223	21.8122	20.4892	20.1076	17.9687	17.1811	20.0618	18.5079	21.098							10	10	10	8.5	8.5	8.5	117.52	0	15.439	793420000	17	13448000	18753000	151200000	22782000	9021500	66661000	64575000	217260000	15135000	0	86836000	8767300	132430000	0.100247	1	0.465888	0.279278	0.298921	1
PfIT_020020900	vacuolar protein sorting-associated protein 45, putative	14.9774	21.8441	18.5671	16.9012	19.5067	20.3565	16.8283	19.4893	18.5345	15.8518	17.4986	19.0694							8	8	8	11.8	11.8	11.8	86.141	0	10.265	321140000	20	8028600	0	150580000	15535000	4895900	0	0	29797000	29438000	0	53700000	15188000	22005000	0.0717638	1	0.458639	0.204854	0.0281979	1
PfIT_080016200	CCR4-associated factor 1	20.2116	22.7192	22.3911	20.161	22.9645	23.5716	20.505	22.7722	21.5098	21.3757	22.0354	22.8425							19	19	19	13.8	13.8	13.8	199.91	0	110.78	3820500000	101	61622000	75280000	428100000	341030000	72689000	92263000	168700000	507440000	444120000	266500000	772960000	185140000	466310000	0.128141	1	0.458418	0.349281	0.0603339	1
PfIT_080034100	prohibitin, putative	20.9235	21.7455	23.4352	21.7848	22.6255	23.0688	22.4896	23.6926	24.4133	17.3422	23.0906	23.8579							6	6	6	30.5	30.5	30.5	30.558	0	24.905	1423200000	20	101650000	27844000	49223000	158790000	50584000	82447000	0	90593000	189810000	125050000	123170000	312810000	212840000	0.214612	1	0.458322	0.552409	0.739849	1
PfIT_050012100	rhomboid protease ROM4	21.345	25.087	22.0358	20.7951	24.4888	24.5552	22.734	25.0823	20.7253	24.4293	24.5099	24.1313							17	17	17	27.8	27.8	27.8	86.825	0	132.68	7665100000	108	201710000	101220000	1354400000	163390000	69141000	265090000	858500000	894620000	1350000000	907840000	936790000	65873000	698280000	0.0966387	1	0.457078	0.270025	0.00471901	1
PfIT_130042200	tryptophan--tRNA ligase	15.0132	19.9759	17.9576	16.7575	18.689	18.863	17.5489	18.6819	18.8037	14.1488	18.5173	20.18							3	3	3	6.3	6.3	6.3	73.099	0.0036697	2.7252	177440000	3	4929000	0	37125000	9163700	3988400	6903000	0	15215000	15140000	13507000	17164000	16473000	42765000	0.102687	1	0.454257	0.285509	0.176628	1
PfIT_040028700	reticulocyte binding protein homologue 4	16.8729	20.0838	16.7074	16.2255	19.0557	19.7409	17.5394	18.7697	16.8723	19.471	18.251	18.5674							7	7	7	4.3	4.3	4.3	205.73	0	17.87	476960000	16	5020700	11402000	105580000	10166000	7279500	18097000	69038000	51767000	42460000	29637000	83239000	11397000	36903000	0.106157	1	0.452662	0.294331	0.0446189	1
PfIT_110046800	60S ribosomal protein L35ae, putative	26.4934	27.2402	26.8754	24.3583	29.6228	27.9831	24.6568	28.2233	23.8065	26.1695	27.6963	26.0395							5	5	5	21.4	21.4	21.4	16.265	0	29.419	13236000000	31	2206000000	566840000	951180000	738680000	129040000	158700000	452860000	4960200000	1880200000	1304900000	1591900000	88028000	413820000	0.103548	1	0.451749	0.287702	0.404534	1
PfIT_120006800	Plasmodium exported protein (PHISTa-like), unknown function	14.2229	21.1154	18.9041	13.3599	20.6082	21.6214	15.2965	21.6052	15.7393	20.8764	21.5559	21.3597							2	2	2	10	10	10	25.876	0	6.429	221710000	5	18476000	0	27262000	5886900	0	0	23099000	19181000	38281000	36995000	38715000	0	32292000	0.0465468	1	0.449035	0.136034	0.0646401	1
PfIT_020019400	rhoptry neck protein 6	15.546	22.7848	20.6398	14.8429	22.7666	22.6873	21.837	22.0921	19.5919	21.4377	21.2698	22.0094							7	7	7	9.2	9.2	9.2	115.82	0	16.654	1736600000	18	41347000	0	303490000	68618000	0	157340000	119300000	299690000	187780000	106200000	283660000	33189000	177310000	0.0444866	1	0.442077	0.130275	0.264584	1
PfIT_110049100	ras-related protein Rab-6	24.0057	25.6075	24.8138	24.309	25.9419	25.4989	24.6109	24.2293	24.9961	24.4216	24.8386	26.0185							10	10	10	57	57	57	23.609	0	41.884	6010500000	69	429320000	235810000	715740000	412870000	290980000	358710000	314600000	902460000	275350000	420020000	663860000	468480000	951660000	0.261618	1	0.440963	0.656248	0.142401	1
PfIT_130025900	ras-related protein Rab-11A	24.4939	25.6036	25.4951	24.6153	26.253	26.0268	25.0303	26.0714	24.5192	24.2332	25.7929	25.9667							12	12	11	57.4	57.4	52.3	24.752	0	194.9	7386600000	60	568200000	307150000	662810000	614790000	334110000	445470000	256350000	1039600000	916680000	755770000	888800000	312580000	852480000	0.280836	1	0.434179	0.697692	0.00536689	1
PfIT_020007000	EMP1-trafficking protein	19.837	23.0931	21.1645	22.6356	21.6519	21.1011	23.2582	23.7777	21.5507	22.5783	22.755	21.6736							5	5	5	20.7	20.7	20.7	33.727	0	28.042	958550000	27	68468000	13112000	125270000	32905000	91228000	140470000	87675000	46132000	201340000	99097000	31491000	43005000	46831000	0.154091	1	0.431351	0.412226	0.574485	1
PfIT_110030400	conserved Plasmodium protein, unknown function	23.5051	20.9772	20.6148	21.5782	21.2402	23.5694	22.2103	21.893	14.4305	22.0694	23.9499	22.5686							4	4	4	35.5	35.5	35.5	11.544	0	7.7973	415230000	9	69205000	71429000	12386000	9634100	18786000	29116000	26405000	14862000	23366000	97232000	74690000	0	37322000	0.136469	1	0.430251	0.369696	0.334246	1
PfIT_120028300	nucleus export protein BRR6, putative	16.271	24.2277	23.0798	16.5047	24.1605	24.1924	15.3606	24.414	19.3803	23.1676	24.1882	23.2924							5	5	5	8.8	8.8	8.8	53.257	0	8.2824	1795900000	27	128280000	0	275030000	124120000	0	0	131910000	262520000	312940000	267600000	268390000	9553800	143820000	0.0406964	1	0.426391	0.119623	0.152561	1
PfIT_060025100	mRNA binding Pumilio-homology domain protein, putative	19.5827	20.2389	21.0867	18.8455	21.7568	21.5832	14.9513	21.9372	16.5956	20.6817	21.5283	20.8231							6	6	6	7.6	7.6	7.6	93.684	0	8.8244	772890000	21	22083000	27482000	43310000	77947000	16486000	0	58871000	124030000	140550000	105860000	109960000	3466100	64931000	0.153127	1	0.425702	0.409921	0.502427	1
PfIT_040012400	conserved Plasmodium protein, unknown function	20.563	23.4284	21.8281	19.6411	23.6291	23.8248	21.7476	24.402	20.8657	23.1524	23.6244	23.539							30	30	30	22.1	22.1	22.1	226.88	0	128.03	9331200000	109	107260000	134780000	982110000	323920000	71134000	306350000	811140000	1128800000	1928600000	1125100000	1292800000	166240000	1060300000	0.0952668	1	0.425177	0.266494	0.106712	1
PfIT_120032800	conserved Plasmodium protein, unknown function	22.9192	24.9985	23.7731	22.8135	25.5082	24.6329	23.8479	25.8959	20.412	23.7578	25.1925	25.7717							24	24	24	32.2	32.2	32.2	91.294	0	151.19	13351000000	161	325640000	325200000	1374300000	587760000	302240000	619030000	581530000	1956700000	2560000000	1572100000	1066700000	57203000	2348700000	0.15842	1	0.421272	0.422543	0.108094	1
PfIT_070012200	rhoptry-associated membrane antigen	19.3841	23.4029	20.3016	19.3583	21.707	23.2785	21.3606	23.5649	20.8505	21.7459	21.2538	23.8699							5	5	5	8.9	8.9	8.9	103.65	0	48.454	2036000000	30	65678000	21210000	343820000	40063000	20835000	83471000	109030000	106130000	384680000	77516000	315430000	58611000	475240000	0.0893328	1	0.418419	0.251139	0.239478	1
PfIT_050013900	pre-mRNA-processing ATP-dependent RNA helicase PRP5, putative	17.5884	18.6618	18.548	17.2093	18.9971	19.8378	16.976	16.2839	15.1137	19.0611	18.303	19.5631							6	6	6	4	4	4	176.05	0	8.7331	368680000	15	4496100	16160000	34007000	31429000	12426000	10571000	44853000	42905000	6542600	26521000	76838000	2907300	63519000	0.187502	1	0.415312	0.490641	1.53985	1
PfIT_110010300	tRNA-splicing ligase RtcB, putative	21.9777	23.6254	24.519	23.6783	23.1135	24.5676	23.6161	23.241	24.776	20.3294	22.9035	25.0722							12	12	12	30.6	30.6	30.6	56.32	0	79.194	4610400000	72	184420000	103250000	323510000	601030000	335600000	321410000	32938000	226880000	247850000	196150000	621600000	718240000	881920000	0.183621	1	0.412403	0.48167	0.224645	1
PfIT_120017500	peripheral plastid protein 1, putative	20.0137	24.4674	20.5469	19.2036	23.9152	23.14	21.483	24.3673	20.5523	23.4303	23.6178	23.6678							9	9	9	19.9	19.9	19.9	66.372	0	80.635	2761700000	37	115070000	25407000	556740000	36765000	14490000	70346000	271290000	379680000	519410000	308950000	221840000	36904000	319850000	0.0709341	1	0.410266	0.202636	0.0898946	1
PfIT_070010400	inositol-phosphate phosphatase, putative	18.1332	22.7928	21.9469	19.4247	22.4575	22.2164	19.1463	22.5059	19.5746	20.068	21.6219	22.194							34	34	34	13.7	13.7	13.7	330.42	0	95.65	5630500000	140	39374000	41111000	1039100000	578100000	100640000	82976000	157180000	823570000	851710000	461480000	696840000	111660000	686120000	0.0834764	1	0.408585	0.235851	0.111653	1
PfIT_130050900	inner membrane complex protein	22.7654	25.2162	22.6195	22.2276	25.5751	24.0084	23.1728	25.8495	22.8998	24.5009	25.0328	24.5779							7	7	7	26.5	26.5	26.5	43.186	0	79.843	4848000000	59	285180000	121200000	662630000	109540000	83490000	160750000	403600000	849770000	1027900000	583550000	286870000	133040000	425730000	0.114165	1	0.403352	0.314534	0.1279	1
PfIT_110029400	60S ribosomal protein L35, putative	25.6637	26.709	28.3013	25.6925	27.563	28.6271	25.3013	27.2385	23.5868	25.4998	27.1174	26.8185							5	5	5	22.6	22.6	22.6	14.748	0	6.8348	5053200000	28	1684400000	159470000	329090000	992300000	162680000	124040000	142340000	594880000	475020000	436810000	1243800000	37798000	355060000	0.128504	1	0.402892	0.350177	0.509034	1
PfIT_050007300	conserved protein, unknown function	14.675	20.5102	18.9418	15.0994	20.3789	19.8459	18.1767	20.5264	18.3107	18.509	17.3213	19.5156							1	1	1	2.4	2.4	2.4	45.465	0.0095185	1.8986	128470000	8	7557200	0	25388000	8560800	0	5037200	6342100	23179000	25676000	0	16020000	5527300	12742000	0.0569976	1	0.399079	0.16492	0.194064	1
PfIT_070008400	erythrocyte membrane-associated antigen	22.7066	22.0208	22.0468	22.0552	22.3576	23.5483	22.2116	22.8652	21.0109	22.997	21.8401	23.2387							41	41	41	20.3	20.3	20.3	264.22	0	117.62	8221300000	194	74066000	759770000	472330000	480930000	483740000	539100000	929210000	596520000	848070000	416730000	1361700000	234550000	1098700000	0.319128	1	0.395612	0.778813	0.14464	1
PfIT_050009300	cation transporting P-ATPase	17.8482	19.2078	16.5814	15.6156	20.889	18.3173	14.0002	20.6919	13.399	18.5681	20.1895	17.8184							9	9	9	4.8	4.8	4.8	283	0	12.379	631450000	19	6717600	22181000	56918000	9218100	0	0	36532000	182540000	159230000	112410000	30703000	0	21728000	0.082063	1	0.39484	0.23214	0.306567	1
PfIT_100022300	serine/threonine protein phosphatase 8, putative	17.0022	21.7115	19.5355	15.1872	22.4987	21.7444	18.4917	23.4366	15.6901	20.4605	22.2618	21.3671							27	27	27	14.8	14.8	14.8	255.74	0	58.319	4027100000	71	34716000	15227000	398340000	88151000	0	42758000	167370000	687430000	1317000000	583370000	407540000	6132400	313770000	0.0502375	1	0.393697	0.146297	0.0266938	1
PfIT_050017700	ras-related protein Rab-1B	25.1909	25.6134	25.5961	24.4871	26.805	26.2838	24.7788	25.6642	25.7661	23.9984	25.8529	26.553							6	6	6	34.5	34.5	34.5	22.886	0	19.757	10843000000	54	677670000	612820000	821320000	811550000	376240000	460550000	268150000	1876100000	850770000	969660000	1307200000	913030000	1575300000	0.212496	1	0.391857	0.547642	0.0648159	1
PfIT_130035600	DnaJ protein, putative	15.3412	21.368	20.2474	15.9347	22.0326	20.1605	19.9316	21.245	19.9084	16.0673	20.1625	20.8569							2	2	2	6.9	6.9	6.9	39.573	0	3.8521	237380000	10	16956000	0	37892000	17425000	0	14000000	0	60063000	34795000	16430000	16408000	13777000	26587000	0.0519673	1	0.390416	0.151084	0.292813	1
PfIT_060009900	long chain polyunsaturated fatty acid elongation enzyme, putative	22.3564	22.6959	24.1107	23.0758	22.5964	24.6545	22.8308	22.1908	24.4648	23.0591	24.55	24.4428							5	5	5	16.4	16.4	16.4	34.732	0	35.003	1960600000	12	163380000	64437000	81531000	217380000	106090000	89524000	104870000	76097000	57447000	294760000	316910000	277850000	273660000	0.179496	1	0.387909	0.472097	0.0425035	1
PfIT_130032600	conserved Plasmodium protein, unknown function	15.9821	20.1521	16.4314	15.8885	19.1731	18.6657	16.2483	19.1009	15.7966	19.5293	18.109	19.6378							7	7	7	4.6	4.6	4.6	205.22	0	11.966	406720000	13	4785000	0	99039000	0	5156100	6616900	64315000	50246000	47792000	24031000	35348000	4837900	69341000	0.0819648	1	0.387222	0.231882	0.10132	1
PfIT_090021000	conserved Plasmodium protein, unknown function	15.8393	17.5754	17.8218	15.3534	18.4382	18.6027	15.9771	18.1861	11.6242	17.2943	18.4795	17.8798							3	3	3	1.4	1.4	1.4	305.07	0	4.7834	249050000	6	2147000	6800600	22656000	26876000	0	0	0	41200000	34596000	42398000	46177000	366190	27978000	0.114147	1	0.385922	0.31449	0.376057	1
PfIT_030006500	Plasmodium exported protein, unknown function	22.2798	23.9752	22.1849	22.4631	24.1329	22.9978	22.2494	24.4199	20.7022	22.0435	22.4373	23.4261							4	4	4	13.9	13.9	13.9	37.389	0	13.983	1421100000	25	109310000	66196000	214380000	61983000	75164000	64814000	56194000	239140000	291780000	73833000	108890000	22178000	146530000	0.193652	1	0.384635	0.504789	0.104734	1
PfIT_030007900	conserved Plasmodium protein, unknown function	17.6557	20.2918	18.3517	17.1107	20.6176	19.715	18.3449	20.3196	15.6821	19.3892	20.4374	19.8348							5	5	5	4.4	4.4	4.4	171	0	7.266	742880000	19	9171300	16726000	103970000	27095000	11464000	26968000	55620000	130320000	105990000	115010000	69709000	4258500	75746000	0.104529	1	0.381402	0.290198	0.156411	1
PfIT_130060700	histone-lysine N-methyltransferase, putative	21.3048	20.8501	21.6618	19.1128	22.989	22.859	18.4522	22.292	13.7224	22.1416	22.6753	21.7398							6	6	6	12.6	12.6	12.6	60.023	0	9.5834	1293900000	24	44618000	75124000	54816000	96217000	16441000	10401000	134180000	241420000	148920000	194240000	220620000	0	101560000	0.106448	1	0.381364	0.295069	0.554738	1
PfIT_030023100	conserved Plasmodium protein, unknown function	17.9807	16.9572	17.1285	17.9139	17.1113	18.1712	18.254	17.998	14.8398	18.4935	19.2729	17.3426							2	2	2	1.6	1.6	1.6	135.86	0.0099723	1.8435	164190000	6	2985300	14226000	6998100	7880200	13582000	17193000	20299000	7787200	14398000	34840000	16234000	1612900	9141200	0.347531	1	0.376645	0.837908	0.10222	1
PfIT_120034800	myosin D	14.3474	17.9852	16.6405	12.5882	19.2496	18.2616	15.9667	19.5818	14.1201	17.1928	17.1246	18.5558							3	3	3	1.3	1.3	1.3	270.07	0	4.3545	333570000	15	2779800	0	31137000	12259000	0	0	17977000	74798000	94165000	17149000	37711000	2136700	46242000	0.0555798	1	0.375435	0.161033	0.0410118	1
PfIT_100007800	inner membrane complex protein 1c, putative	24.6039	25.7954	24.5445	23.2319	26.4904	26.3442	26.1478	27.2333	23.2461	26.9767	26.3082	26.4805							9	8	8	34.9	32	32	32.653	0	155.37	14423000000	85	848400000	433460000	989970000	416000000	167480000	1263900000	2245200000	1602800000	2682300000	1412500000	1448300000	169140000	1591700000	0.119902	1	0.37428	0.328874	0.168388	1
PfIT_110011900	polyadenylate-binding protein-interacting protein 1, putative	23.2002	23.1978	23.6671	22.9934	23.7427	24.4465	23.4387	23.7772	23.894	23.3593	23.8056	24.3845							56	56	56	20.5	20.5	20.5	379.58	0	323.31	21976000000	340	166490000	1272100000	1270100000	1758200000	1102200000	1500900000	1420400000	1852900000	1897600000	1935300000	3017900000	2057700000	2891000000	0.344776	1	0.372517	0.832212	0.773948	1
PfIT_140036200	coatamer beta subunit, putative	18.9144	22.4031	21.6696	19.6513	21.9799	22.4717	21.0653	22.6613	20.8015	22.0735	22.1329	22.1701							16	16	16	14.2	14.2	14.2	164.48	0	31.856	3028700000	61	44540000	33598000	377160000	226840000	55995000	149200000	300110000	281260000	451070000	312730000	395530000	124280000	320910000	0.0969894	1	0.371911	0.270926	0.15916	1
PfIT_100014700	dolichyl-phosphate-mannose protein mannosyltransferase, putative	20.9678	24.7321	23.1893	22.083	24.5653	23.3546	23.0363	24.1694	21.9287	23.44	22.957	23.9297							6	6	6	30.5	30.5	30.5	25.678	0	78.965	1903700000	38	146440000	26661000	362270000	124340000	57753000	111830000	147950000	322720000	245290000	105850000	139440000	51898000	207730000	0.102153	1	0.371268	0.284147	0.0214894	1
PfIT_090039600	cAMP-dependent protein kinase catalytic subunit	21.2987	24.4973	24.2364	22.3473	23.8188	24.9743	22.1039	24.0633	24.5192	22.3178	24.2643	24.9285							13	13	13	32.5	32.5	32.5	40.196	0	22.984	4050300000	44	202520000	51592000	473660000	395300000	106720000	90152000	104560000	295940000	350600000	403030000	659230000	480900000	638670000	0.104173	1	0.369289	0.289292	0.0597011	1
PfIT_040024300	phosphatidylinositol 4-kinase, putative	17.6364	20.7739	16.5917	17.8907	20.1783	18.0386	18.672	19.8203	14.1447	19.306	19.5771	17.6319							10	10	10	2.2	2.2	2.2	599.33	0	14.893	1652200000	32	6771200	49714000	437500000	24099000	59295000	101910000	158150000	289510000	225890000	190840000	65696000	0	49559000	0.0899524	1	0.368489	0.252749	0.135912	1
PfIT_100018100	conserved Plasmodium protein, unknown function	21.588	25.3252	20.6697	20.3223	24.5392	23.821	23.0388	24.4185	20.768	24.3596	23.9307	24.2068							29	29	29	27.7	27.7	27.7	173.33	0	323.31	12749000000	142	177070000	226980000	3026700000	120090000	94397000	620460000	1549900000	1755400000	1614400000	1151300000	1067000000	128560000	1394100000	0.0662183	1	0.366573	0.189972	0.040999	1
PfIT_080027900	conserved Plasmodium protein, unknown function	19.9894	24.2182	20.0006	18.7786	23.246	23.2825	20.7114	23.6158	19.4221	23.5826	23.4165	22.7818							16	16	16	17.1	17.1	17.1	131.34	0	156.09	4687800000	55	88450000	55167000	1034400000	55598000	23834000	90994000	665760000	527270000	681330000	593370000	540730000	37232000	382180000	0.0619341	1	0.366334	0.178382	0.0273614	1
PfIT_110038300	conserved Plasmodium protein, unknown function	17.2739	20.7752	21.7649	20.1486	17.2753	23.4844	20.2473	16.5798	17.2728	17.1307	21.6463	21.3593							8	8	8	10.1	10.1	10.1	119.89	0	26.065	977730000	25	25730000	0	68195000	135420000	44166000	47296000	0	0	3722200	124730000	445950000	6017700	102230000	0.0558971	1	0.364725	0.161904	0.466394	1
PfIT_120028400	DNA gyrase subunit A	17.0829	23.9732	18.2163	17.1707	22.8074	20.3707	16.6459	22.2054	17.2742	18.9362	20.5442	20.4961							20	20	20	18.8	18.8	18.8	143.14	0	51.796	2055600000	38	34260000	8329500	988120000	18273000	8852400	0	30096000	440430000	290170000	91743000	81349000	9510700	88736000	0.0456756	1	0.358843	0.133602	0.140494	1
PfIT_060029100	DNA polymerase 1, putative	14.5863	21.8197	16.3205	15.1342	20.9521	17.7101	17.592	21.2697	15.3295	20.3301	19.9389	17.3883							5	5	5	4.3	4.3	4.3	173.12	0	6.005	756330000	10	11288000	0	248000000	5483200	0	13237000	88320000	135930000	169400000	67344000	14367000	2758800	11494000	0.0442019	1	0.356638	0.129478	0.0608307	1
PfIT_080035100	conserved Plasmodium protein, unknown function	23.3975	25.155	25.437	22.943	25.7479	26.3655	23.5393	24.9783	22.3792	23.4565	24.886	25.5621							5	5	5	33.6	33.6	33.6	15.902	0	15.635	2712200000	35	387460000	77352000	261510000	317980000	56445000	85339000	80580000	394440000	231370000	217030000	605220000	38187000	346770000	0.103987	1	0.355625	0.288819	0.45002	1
PfIT_030014300	asparagine synthetase, putative	21.0287	24.7543	23.9684	22.5174	23.8701	24.4219	21.0504	23.4433	23.0416	22.3203	23.6589	24.0239							16	16	16	24.4	24.4	24.4	69.863	0	90.678	4155700000	64	148420000	59900000	792430000	459600000	168110000	60806000	146630000	429320000	319360000	370870000	629320000	241750000	477630000	0.0998705	1	0.352661	0.278315	0.211615	1
PfIT_110028100	structural maintenance of chromosomes protein 5, putative	21.7053	22.5048	18.4523	19.7752	23.0623	20.8778	20.07	22.0403	15.4344	22.2131	21.1325	18.4712							14	14	14	10.9	10.9	10.9	152.18	0	22.094	2503500000	27	34295000	249620000	434470000	26184000	65502000	80349000	354930000	639370000	314870000	167810000	140670000	3232500	26529000	0.07873	1	0.350941	0.223359	0.298901	1
PfIT_140040900	dynein-related AAA-type ATPase, putative	14.4322	18.7289	17.0411	13.6281	18.8534	18.7724	15.3405	17.2327	15.1414	16.5162	17.8037	16.8682							12	12	12	1.8	1.8	1.8	965.82	0	28.698	847960000	27	2163200	8665500	170320000	52863000	4963000	16265000	36741000	185670000	60371000	89688000	175530000	0	46896000	0.0567962	1	0.350594	0.164369	0.229372	1
PfIT_030006800	pre-mRNA-splicing factor PRP46, putative	19.1794	18.7073	19.5235	18.7178	19.2812	20.4558	18.6424	19.8069	17.4718	17.7209	20.4312	20.101							3	3	3	7.2	7.2	7.2	69.572	0	13.385	247790000	15	8544500	17218000	12412000	21855000	12503000	11866000	6265200	18476000	26600000	41004000	41706000	5271500	32613000	0.243805	1	0.348178	0.617339	0.279492	1
PfIT_130013500	conserved Plasmodium protein, unknown function	17.957	22.979	20.1954	17.8108	23.3896	20.9712	18.4839	22.7379	17.3528	19.4663	21.9261	19.9785							75	75	75	14.8	14.8	14.8	742.41	0	323.31	10881000000	206	36269000	76331000	2480200000	360200000	68978000	109980000	217300000	3296700000	2098500000	1195500000	616720000	50214000	309930000	0.0550643	1	0.346732	0.159617	0.144468	1
PfIT_040024200	60S ribosomal protein L7ae/L30e, putative	21.79	23.3795	23.2007	21.4512	24.0031	23.9517	22.0213	24.2833	21.7394	22.7185	23.9476	23.8458							4	4	4	15.3	15.3	15.3	27.562	0	5.3478	1264200000	22	126420000	36262000	109130000	96405000	28672000	42567000	69015000	168130000	204180000	161790000	162250000	35012000	150770000	0.129248	1	0.345251	0.352008	0.0389023	1
PfIT_030026600	WD repeat-containing protein, putative	15.946	19.8649	18.0974	16.2936	19.4334	19.1994	15.3644	20.1932	14.9744	18.7756	18.3521	18.5712							8	8	8	3.2	3.2	3.2	318.9	0	16.71	639200000	26	4916900	0	124130000	36460000	0	0	58339000	92040000	155840000	43499000	78260000	0	50632000	0.0788146	1	0.339357	0.223582	0.216101	1
PfIT_070028100	conserved Plasmodium protein, unknown function	18.198	20.9666	17.418	16.4592	21.024	20.1144	18.8813	22.6152	17.2678	21.4311	21.8522	19.6727							6	6	6	4.9	4.9	4.9	143.7	0	12.685	1194100000	18	20239000	17741000	120900000	10332000	5315600	28489000	166830000	125810000	379050000	223380000	66970000	0	49308000	0.066972	1	0.338338	0.192003	0.140603	1
PfIT_070025800	40S ribosomal protein S5, putative	24.7955	25.8879	26.8318	24.4614	26.5556	27.5119	24.7813	26.4234	23.6702	24.7873	26.4392	26.5785							7	7	7	29.2	29.2	29.2	21.863	0	218.89	8761200000	37	876120000	291190000	620930000	1194500000	231000000	288340000	289550000	986360000	899990000	909890000	1913900000	133490000	1002100000	0.113976	1	0.337908	0.31406	0.371158	1
PfIT_130054500	glutamate--tRNA ligase, putative	20.165	22.9971	22.6588	20.9739	22.5271	23.3328	21.2836	22.006	21.244	22.3097	20.0576	23.7023							17	17	17	21	21	21	103.12	0	45.957	3009200000	57	64025000	55252000	393480000	311230000	96797000	119980000	244340000	284070000	197960000	51293000	496540000	116730000	641510000	0.107919	1	0.337615	0.298795	0.175596	1
PfIT_100041200	dynamin-like protein	22.9614	26.4831	22.8603	22.2772	26.0896	24.95	23.9385	26.4467	20.9372	25.3355	25.917	24.371							25	24	24	40.1	39.1	39.1	81.525	0	121.9	17762000000	131	455430000	318510000	3658300000	296960000	198230000	627010000	1651200000	2785000000	3567100000	2471000000	1264000000	78303000	846200000	0.0719943	1	0.337326	0.205469	0.0569033	1
PfIT_050011400	60S ribosomal subunit protein L24-2, putative	22.1329	24.3052	24.1507	21.9491	24.9836	24.6611	23.5754	25.04	20.8849	15.8977	24.9083	24.2275							4	4	4	22.1	22.1	22.1	24.871	0	12.94	1662200000	20	207770000	36793000	165840000	149000000	32391000	99997000	0	265410000	275970000	251900000	212240000	15491000	157140000	0.101137	1	0.334995	0.281552	0.0921797	1
PfIT_100012400	26S protease regulatory subunit 4, putative	20.9802	25.4492	23.6186	21.8756	24.451	24.7144	22.5079	24.0665	23.2778	23.412	23.5733	24.9589							12	12	12	40	40	40	49.824	0	157.96	5125700000	51	205030000	51715000	1145300000	322010000	96196000	149110000	279020000	573350000	439220000	312050000	688210000	254260000	815330000	0.073403	1	0.33098	0.209227	0.0157577	1
PfIT_100016400	hypoxanthine-guanine phosphoribosyltransferase	24.2809	26.7429	25.7697	24.2833	26.8707	26.6263	24.474	26.9793	25.8541	24.0518	26.1803	26.885							9	9	9	51.9	51.9	51.9	26.362	0	129.42	11313000000	69	870250000	264980000	1460000000	743690000	265440000	302930000	226090000	1595300000	1720000000	988520000	1346600000	788500000	1611100000	0.108873	1	0.328955	0.301209	0.0581946	1
PfIT_120054100	26S protease regulatory subunit 8, putative	19.2417	24.6959	22.6621	19.6959	24.4436	23.4414	19.9969	23.4437	22.712	21.9241	22.0093	24.2523							17	16	16	37	34.3	34.3	49.545	0	135.62	3159000000	54	117000000	16737000	733780000	179200000	22930000	28251000	107440000	616070000	308050000	113980000	307560000	185510000	539540000	0.0523617	1	0.32708	0.152173	0.0262156	1
PfIT_100025800	conserved Plasmodium membrane protein, unknown function	14.7077	20.85	17.8235	14.9176	20.3831	19.06	14.9083	20.6897	14.669	16.1561	19.9091	18.6057							26	26	26	4.3	4.3	4.3	831.52	0	43.242	2547100000	63	7298200	9338600	659600000	80950000	10801000	10731000	25486000	477250000	590270000	343600000	190750000	9091600	139220000	0.0461612	1	0.326539	0.134958	0.145598	1
PfIT_110046700	60S ribosomal protein L28	26.1897	27.1891	28.2152	25.862	27.8233	28.8835	25.733	27.7458	24.8693	26.138	27.6011	28.0511							5	5	5	38.6	38.6	38.6	14.38	0	75.563	15413000000	44	2201900000	535770000	1071100000	2181300000	426920000	390380000	516900000	1662400000	1575500000	1425100000	3466500000	214540000	1946800000	0.110912	1	0.324973	0.306356	0.450697	1
PfIT_080027800	U5 snrnp-specific protein, putative	20.0846	23.1569	19.7157	19.2374	23.0679	21.6169	20.5905	21.7121	19.9844	21.6378	21.7904	21.674							6	6	6	23.1	23.1	23.1	37.112	0	9.7977	724320000	20	40240000	20014000	168340000	15499000	11125000	28421000	58737000	158270000	61838000	65288000	57889000	18672000	60228000	0.0722179	1	0.321654	0.206066	0.0646706	1
PfIT_130018200	eukaryotic translation initation factor 4 gamma	21.6897	22.9099	22.0069	21.5357	22.3573	23.6749	22.3526	22.645	20.6932	23.3302	22.16	23.3647							22	22	22	18.5	18.5	18.5	146.28	0	162.85	4692500000	108	76926000	206340000	480740000	257070000	185450000	326680000	643300000	327750000	400100000	285850000	816910000	103420000	658870000	0.167324	1	0.320444	0.443613	0.161713	1
PfIT_100032400	nucleolar preribosomal assembly protein, putative	16.2488	21.9076	20.1284	19.1851	20.6814	19.3773	18.6229	21.3199	13.8294	20.5894	17.4342	20.0595							4	4	4	8.9	8.9	8.9	55.554	0	6.2146	398190000	12	13731000	0	114090000	33238000	17286000	11707000	45752000	48767000	75914000	0	19749000	0	31687000	0.0640754	1	0.319656	0.184185	0.211787	1
PfIT_140070900	phosphatase, putative	19.6277	21.1508	21.0828	19.9502	21.5557	21.3075	20.6054	21.2132	17.0682	20.6387	20.1597	21.5008							17	17	17	13.6	13.6	13.6	170.46	0	31.73	1692900000	34	21986000	62375000	179270000	171030000	78000000	122840000	125710000	237350000	187200000	90190000	199840000	10582000	228500000	0.170346	1	0.317343	0.450717	0.28946	1
PfIT_090025300	inosine-5-monophosphate dehydrogenase	23.5365	23.9032	24.0817	24.2526	23.286	24.9334	23.3811	23.2832	24.3259	23.1808	23.4831	25.3145							16	16	16	40.8	40.8	40.8	56.164	0	105.83	5324700000	92	212990000	304180000	392210000	443870000	499690000	273120000	237710000	255690000	255190000	293110000	801020000	525730000	1043200000	0.248923	1	0.316905	0.628569	0.18273	1
PfIT_140069500	replication factor C subunit 3, putative	22.5552	26.3995	23.7408	22.4468	25.9283	25.2696	24.028	25.7052	22.9796	24.3924	25.1561	25.3247							12	12	12	43.6	43.6	43.6	39.232	0	77.626	8004800000	98	400240000	123260000	1770400000	280370000	114340000	342120000	440420000	1277100000	1094200000	747800000	808970000	165420000	840480000	0.0710279	1	0.316401	0.202887	0.00136656	1
PfIT_100025900	schizont egress antigen-1	17.3351	23.4279	19.0011	15.3808	23.7089	21.6225	18.0547	22.8907	15.2138	20.0276	21.3242	20.4592							21	21	21	12	12	12	244.2	0	65.178	4471200000	67	42181000	17526000	1196200000	55618000	4522600	28862000	113290000	1453500000	824290000	278310000	342230000	4028300	152810000	0.034551	1	0.316033	0.102187	0.155847	1
PfIT_130022400	DNA replication licensing factor MCM4	18.5143	20.7926	16.4714	15.9135	21.9713	18.8387	16.0335	20.6126	19.1527	17.8588	20.0638	21.5189							10	10	10	11.5	11.5	11.5	115.22	0	19.096	780030000	22	13449000	21717000	105340000	5270000	3580000	0	13787000	238480000	92992000	63570000	27192000	33805000	174290000	0.0503617	1	0.315085	0.146641	0.0012131	1
PfIT_130046600	60S ribosomal protein L18-2, putative	27.2628	29.3664	28.1377	26.8454	30.2842	28.5763	27.2427	30.5882	26.1468	27.1893	28.128	28.5752							6	6	6	27.3	27.3	27.3	21.453	0	42.73	28352000000	59	5670400000	805180000	3460500000	1476600000	602890000	794070000	765180000	6537700000	8070800000	1466700000	2001200000	371470000	1999700000	0.09609	1	0.312984	0.268613	0.0622189	1
PfIT_060020100	kinetochore protein NDC80, putative	14.6928	21.4913	20.067	14.239	21.9176	21.0173	18.7856	23.0405	16.6771	20.1311	21.4566	21.8278							8	8	8	14.7	14.7	14.7	69.874	0	128.99	784830000	24	27063000	0	85488000	31853000	0	13105000	33299000	114880000	250190000	83463000	61552000	3038900	107950000	0.0325707	1	0.307642	0.0965249	0.0962482	1
PfIT_060010600	conserved Plasmodium protein, unknown function	21.5785	21.0177	21.7014	19.7078	22.9524	22.5591	20.1766	22.9551	17.0898	20.5136	22.4701	21.236							32	32	32	14.1	14.1	14.1	279.48	0	68.251	5036800000	91	43050000	366410000	248390000	398990000	100190000	138660000	175140000	949630000	951380000	679760000	723000000	16320000	288960000	0.106168	1	0.307233	0.294359	0.327342	1
PfIT_080007600	periodic tryptophan protein 2, putative	15.7866	20.2713	18.6908	17.3107	19.3353	19.0201	15.1214	16.9488	14.8641	18.5228	18.6727	18.5347							2	2	2	2.5	2.5	2.5	128.96	0.0057971	2.2099	206720000	6	4218700	0	62012000	20735000	7965900	0	18455000	32413000	0	20476000	26051000	0	18608000	0.0737073	1	0.305842	0.210037	0.821901	1
PfIT_120027400	endoplasmin, putative	24.3406	26.3215	25.3903	24.6049	26.0226	26.3421	24.5964	26.1114	24.9989	25.6245	26.5795	27.2405							41	41	41	52.3	52.3	52.3	95.017	0	323.31	36181000000	248	769800000	998520000	3941500000	2067000000	1199300000	1192200000	2431400000	3203900000	3407200000	4713200000	3998000000	1575800000	7452600000	0.14511	1	0.305706	0.390661	0.0544458	1
PfIT_140070200	conserved Plasmodium membrane protein, unknown function	17.7975	23.1254	19.6426	15.4294	23.0826	22.9612	20.5551	23.0678	18.908	22.7961	22.5584	22.2725							16	16	16	16.4	16.4	16.4	126.13	0	29.765	2888700000	60	56641000	11619000	466660000	41744000	2250500	78573000	371440000	453010000	448420000	315010000	416470000	25087000	258380000	0.0343858	1	0.302532	0.101716	0.121005	1
PfIT_020016300	asparagine--tRNA ligase	20.5511	21.6095	19.5238	20.0499	20.666	21.8736	20.2765	21.3776	13.9163	22.2728	21.0445	20.7013							3	3	3	5.4	5.4	5.4	70.497	0.0025268	3.0324	725330000	9	25011000	44556000	92792000	21861000	31479000	36832000	146950000	48248000	79014000	62720000	111430000	0	49441000	0.138379	1	0.301667	0.374348	0.35263	1
PfIT_030021600	40S ribosomal protein S15A, putative	27.4103	30.0936	29.5472	27.4568	30.497	30.0003	28.37	30.1262	26.7448	28.9013	29.5372	29.4005							9	9	9	60	60	60	14.873	0	62.173	68020000000	123	8502500000	1427000000	9165500000	6275900000	1473700000	2775300000	4011000000	12122000000	9375400000	6232800000	8592300000	899700000	5669000000	0.0855345	1	0.301006	0.241239	0.180106	1
PfIT_050018900	ras-related protein Rab-1A	20.0951	22.3534	21.0309	18.8871	22.7558	22.7373	20.2115	22.6248	22.0721	22.7005	22.2634	22.6618							6	6	6	41.1	41.1	41.1	23.859	0	47.128	645090000	22	53757000	13440000	64303000	25710000	5818000	14569000	81793000	84990000	77611000	60412000	83906000	52910000	79625000	0.0729489	1	0.30031	0.208016	0.185335	1
PfIT_050010100	conserved Plasmodium protein, unknown function	15.0185	19.6692	18.8979	15.1734	20.5172	18.7919	15.1975	21.0874	15.5529	15.937	19.657	18.9429							16	16	16	3.1	3.1	3.1	671.57	0	33.202	1929600000	36	6991300	9160900	230100000	134820000	10199000	10371000	0	414180000	614990000	228160000	125260000	13268000	139080000	0.0480253	1	0.298955	0.140154	0.0865453	1
PfIT_090026100	tetratricopeptide repeat family protein, putative	16.3293	19.4908	17.0409	16.8004	18.6076	18.3477	17.6068	20.0958	13.1818	18.6093	18.982	15.8009							5	5	5	3.3	3.3	3.3	198.37	0	10.024	324450000	8	3956700	0	60412000	11057000	9359700	16368000	32793000	32754000	91892000	42458000	27353000	0	0	0.095997	1	0.298248	0.268374	0.106228	1
PfIT_130034600	chromatin assembly factor 1 subunit, putative	19.3791	25.3953	19.3546	18.7832	24.8344	21.3916	15.7384	23.2938	13.5122	21.5861	21.2329	20.5449							9	9	9	16.5	16.5	16.5	66.511	0	18.341	2208600000	25	96026000	15682000	1015000000	15418000	10376000	0	72406000	688050000	236510000	56683000	63274000	0	35185000	0.0373088	1	0.293385	0.110037	0.467013	1
PfIT_070009700	conserved Plasmodium protein, unknown function	18.3544	23.1298	19.6286	17.8095	22.7895	21.3899	19.7872	23.1347	19.6467	21.232	21.775	21.4441							11	11	11	12.8	12.8	12.8	152.7	0	59.565	2665800000	37	40391000	22120000	605770000	53500000	15161000	59714000	162550000	478470000	607840000	236840000	181360000	54175000	188310000	0.0486379	1	0.291997	0.141857	0.0949267	1
PfIT_030026700	cyclic amine resistance locus protein	17.9756	21.1513	18.5699	17.557	21.2938	19.7189	18.7431	20.6316	16.4417	19.6642	19.2973	19.8445							6	6	6	5.2	5.2	5.2	153.17	0	12.677	793160000	14	11171000	18300000	165360000	27627000	13691000	31152000	58990000	182530000	115340000	45744000	61269000	6320000	66842000	0.0698325	1	0.290976	0.199687	0.150281	1
PfIT_060017900	myosin E, putative	16.9296	18.8765	15.4502	15.3403	19.9085	16.8617	17.6328	19.7709	12.6385	19.4405	18.7295	18.7402							7	7	7	3.6	3.6	3.6	255.5	0	8.14	473710000	14	3882900	0	58715000	5461700	0	24795000	86804000	120070000	109140000	0	14529000	777930	53421000	0.0590505	1	0.284747	0.170532	0.0600804	1
PfIT_110026600	conserved Plasmodium protein, unknown function	15.6803	21.5559	19.8212	16.2256	21.826	19.8592	18.6501	20.0591	19.377	16.6774	20.985	21.2715							3	3	3	8.3	8.3	8.3	42.578	0	62.917	262980000	7	15470000	0	52410000	15748000	0	6993500	0	63202000	18570000	35282000	16169000	11574000	43034000	0.0404228	1	0.284465	0.118851	0.0668231	1
PfIT_130027000	splicing factor 1	18.1959	16.884	20.5035	17.4978	17.5665	21.3693	20.6587	22.0782	19.1835	20.3811	16.631	19.9813							4	4	4	6.9	6.9	6.9	99.612	0	7.2438	454080000	7	13760000	9908700	0	49054000	6107500	54628000	45064000	0	146120000	0	89393000	19649000	34159000	0.0591182	1	0.283391	0.170717	0.716204	1
PfIT_060015600	conserved Plasmodium protein, unknown function	19.9156	23.7524	19.9455	17.6271	23.8027	23.0326	21.3547	24.3556	18.6301	23.0504	23.5702	22.4073							10	10	10	18.6	18.6	18.6	76.663	0	134.38	2360900000	33	90803000	25713000	367410000	26253000	5263300	69723000	225860000	380450000	558120000	323830000	223090000	10549000	144620000	0.0414689	1	0.282987	0.1218	0.0394469	1
PfIT_140034300	conserved protein, unknown function	21.9409	18.5174	23.3703	23.4471	17.1818	24.0404	24.1203	18.4297	19.4928	23.2648	21.5354	24.0285							4	4	4	15.7	15.7	15.7	33.006	0	14.398	1205900000	9	92763000	52337000	0	140960000	148660000	237070000	131030000	0	0	39514000	224300000	9590600	222460000	0.0361689	1	0.280264	0.106798	0.0938923	1
PfIT_060030600	pyruvate kinase	24.0601	25.9543	26.2014	24.6865	26.0176	26.3496	24.0795	25.1225	26.2858	23.3623	25.1982	26.6682							19	19	19	42.5	42.5	42.5	55.66	0	323.31	17699000000	137	632100000	489740000	1820500000	2160500000	756020000	496390000	301920000	1902100000	1022700000	1077900000	2394200000	2290800000	2985800000	0.120411	1	0.279287	0.330142	0.0931875	1
PfIT_110047500	DNA-directed RNA polymerases I and III subunit RPAC1, putative	20.4545	22.7067	21.1653	21.6447	22.0253	21.4913	22.4467	22.4524	20.4841	23.3588	21.9524	22.7425							5	5	5	17.4	17.4	17.4	38.962	0	4.8188	1229400000	7	55884000	31611000	150600000	51738000	72132000	125770000	236650000	93905000	126260000	89281000	64855000	32268000	154380000	0.151965	1	0.278244	0.407142	0.139654	1
PfIT_110033400	conserved Plasmodium protein, unknown function	18.8288	20.7017	21.7826	15.9895	23.3661	22.7728	19.896	23.4371	20.2276	22.8915	22.8414	22.9626							9	9	9	16.2	16.2	16.2	73.825	0	24.672	1702100000	31	60788000	13037000	47752000	101010000	0	27318000	217860000	302750000	318000000	210430000	200650000	34378000	228860000	0.0365617	1	0.271792	0.107915	0.203478	1
PfIT_030012500	conserved Plasmodium protein, unknown function	21.4553	22.3154	21.8868	19.824	23.1969	23.4501	19.9902	21.8266	19.5892	21.1835	22.2856	22.6908							21	21	21	17.6	17.6	17.6	213.42	0	103.5	4195600000	61	53790000	224280000	407090000	302480000	72397000	81234000	185760000	750000000	290100000	398770000	893880000	61521000	528090000	0.080089	1	0.271167	0.226945	0.903114	1
PfIT_140065800	conserved Plasmodium protein, unknown function	23.7506	26.407	24.0049	23.5735	25.84	25.5571	23.5816	25.3084	23.7956	25.4431	25.3147	26.1052							11	11	11	29.4	29.4	29.4	40.068	0	53.29	9401000000	55	470050000	282280000	1779600000	336680000	249660000	251080000	912390000	1201300000	831060000	834660000	987410000	291210000	1443700000	0.0863755	1	0.269393	0.243436	0.186984	1
PfIT_070018500	conserved Plasmodium protein, unknown function	21.1326	21.9281	22.1335	20.4342	21.9044	23.6587	22.1526	22.6274	21.6792	21.7129	21.0308	23.2621							23	23	23	19.9	19.9	19.9	159.73	0	81.518	3517300000	80	59615000	135640000	235430000	271450000	83592000	275080000	202800000	231610000	382290000	126400000	781310000	198130000	593570000	0.0977988	1	0.267748	0.273005	0.441541	1
PfIT_080015200	protein phosphatase PPM5, putative	15.0689	20.3894	18.1159	13.3407	19.7809	21.2549	20.7771	20.446	18.8647	21.2686	17.2628	22.5129							5	5	5	9.5	9.5	9.5	63.619	0	6.8531	345490000	15	17275000	0	27470000	5681700	0	35938000	50526000	18017000	28567000	0	50050000	9547200	119700000	0.0313214	1	0.267443	0.0929415	0.587266	1
PfIT_130045900	RNA lariat debranching enzyme, putative	18.8862	20.2865	19.1647	19.5957	19.57	19.9713	20.5707	20.9056	18.4465	20.7719	19.2444	19.7276							5	5	5	10.8	10.8	10.8	67.538	0	6.2267	387470000	19	12108000	15505000	40926000	18807000	25354000	49838000	57296000	24906000	62857000	19874000	32893000	11431000	27780000	0.234135	1	0.266515	0.595998	0.235885	1
PfIT_070008100	conserved Plasmodium protein, unknown function	17.6871	21.4628	19.1223	16.9148	21.6134	20.5386	16.9639	20.6068	14.5934	19.2556	18.7195	20.3435							9	9	9	6.5	6.5	6.5	178.02	0	13.607	891980000	15	12389000	15194000	208110000	41088000	0	0	45066000	231010000	114970000	31080000	109670000	0	95799000	0.0506143	1	0.264847	0.147341	0.41997	1
PfIT_120034500	T-complex protein 1 subunit gamma	18.74	24.0457	22.7524	19.736	23.1111	23.4854	18.1233	22.9035	22.1797	21.2902	22.645	23.6788							14	14	14	28.8	28.8	28.8	60.662	0	46.698	2949600000	41	81932000	15762000	623410000	254360000	31437000	10280000	92317000	326170000	282460000	236110000	422770000	171020000	483460000	0.0454119	1	0.264825	0.132864	0.130904	1
PfIT_100008200	60S ribosomal protein L13, putative	25.1874	28.0212	27.1902	24.7831	28.58	27.828	24.8838	28.366	23.8849	25.9296	28.0029	26.1838							9	9	9	32.7	32.7	32.7	23.754	0	45.768	21270000000	47	1933700000	420310000	2996400000	1684400000	317590000	340540000	703020000	4414100000	3805500000	2958800000	2621000000	170400000	838490000	0.0641051	1	0.264132	0.184266	0.273107	1
PfIT_070030300	conserved Plasmodium membrane protein, unknown function	14.0658	21.6042	18.1408	13.3024	21.776	19.5238	17.0045	21.4483	14.614	19.3754	20.7043	19.1917							30	30	30	6.9	6.9	6.9	598.23	0	64.769	3394300000	68	13854000	4201200	781060000	70811000	2475100	32212000	166620000	879800000	701060000	418570000	184680000	6143300	146700000	0.0264667	1	0.263769	0.0789318	0.0281525	1
PfIT_040010600	apical sushi protein	16.4008	19.222	14.8118	15.6944	17.5349	17.9924	17.0452	19.1738	17.6469	16.7793	18.0235	17.0498							2	2	2	4	4	4	85.504	0	4.2746	113870000	4	2648200	3720500	26295000	0	2280100	5815200	4836600	8165700	25430000	11457000	11213000	8825100	5834400	0.0620363	1	0.262342	0.178659	0.327362	1
PfIT_140072600	26S proteasome regulatory subunit RPN2, putative	14.6896	21.9121	20.3229	16.7136	20.2888	20.6988	17.6199	20.3039	20.4838	17.3827	20.2036	22.1112							12	12	12	11.1	11.1	11.1	132.82	0	16.725	889840000	31	17112000	0	205220000	68205000	0	10474000	8886500	66612000	67308000	62789000	88505000	76254000	235590000	0.034588	1	0.258848	0.102293	0.0728668	1
PfIT_120034200	multidrug resistance-associated protein 2	15.0153	21.4835	20.55	15.103	22.205	20.4989	16.866	22.6433	16.1884	18.6857	22.3408	18.2755							14	14	14	7.8	7.8	7.8	249.74	0	23.669	2286600000	53	23573000	3212400	284410000	148920000	3413700	11586000	40901000	468970000	635440000	515250000	143730000	0	30779000	0.0288767	1	0.252737	0.0859035	0.0539706	1
PfIT_050034100	conserved Plasmodium protein, unknown function	20.3346	22.4069	21.2871	20.9987	21.6292	22.1566	20.6023	21.5789	20.0579	16.9182	21.2646	21.5016							5	5	5	7.4	7.4	7.4	82.933	0	6.0814	861300000	19	30761000	37026000	155710000	71649000	58669000	44573000	0	90823000	87710000	70542000	130900000	30563000	83135000	0.135479	1	0.251968	0.367281	0.329043	1
PfIT_130009600	small heat shock protein, putative	23.5121	26.3145	25.2375	23.5151	25.9869	26.315	23.7074	25.8323	24.7936	24.2284	25.586	26.249							13	13	13	59.7	59.7	59.7	25.195	0	37.47	7140300000	58	549250000	155520000	1084900000	514280000	155840000	178060000	255520000	864530000	776660000	654770000	1085300000	378060000	1036800000	0.0731812	1	0.250979	0.208636	0.0845262	1
PfIT_110039900	conserved Plasmodium protein, unknown function	19.1359	21.9075	21	18.7126	23.4247	20.6558	18.9424	22.8406	18.456	20.6891	22.1823	21.1998							6	6	6	25.3	25.3	25.3	28.494	0	7.9866	669270000	15	37182000	10370000	70808000	37750000	7732800	9067600	30431000	202690000	135200000	85668000	29735000	6472700	43357000	0.0540961	1	0.249887	0.156954	0.138107	1
PfIT_040020800	histone acetyltransferase, putative	14.7699	20.9573	16.7811	15.526	17.904	19.8179	17.2667	20.8125	16.147	17.5026	20.261	20.3647							7	7	7	7.5	7.5	7.5	146.96	0	31.761	471800000	19	7996600	0	120120000	6644900	0	9303400	0	14470000	108650000	74131000	54529000	4281400	79663000	0.0379258	1	0.246478	0.111787	0.0884268	1
PfIT_140030200	conserved Plasmodium protein, unknown function	24.011	25.5061	23.7441	22.7067	25.8539	25.434	23.729	25.5954	20.6728	23.905	25.3757	24.5727							39	39	39	30.8	30.8	30.8	183.05	0	323.31	20514000000	236	341900000	1014400000	2859200000	843010000	410730000	834270000	942460000	3638800000	3041900000	2612200000	2719800000	100300000	1497100000	0.0761797	1	0.244478	0.216608	0.285805	1
PfIT_020017000	conserved Plasmodium protein, unknown function	25.8268	24.6471	24.6693	24.4781	25.791	25.6031	24.8668	26.0241	20.8814	22.3524	26.2871	24.5547							79	79	79	19.6	19.6	19.6	475.69	0	323.31	86929000000	372	457520000	11309000000	4992100000	5069500000	4440100000	5813100000	1017400000	11031000000	12966000000	15558000000	9684200000	367000000	4682200000	0.161408	1	0.242971	0.429637	0.281839	1
PfIT_110026000	protein GCN20	22.1848	23.61	22.6474	22.5322	23.5737	23.0542	21.8071	23.1801	21.49	21.7876	22.5092	23.3144							15	15	15	21.7	21.7	21.7	95.374	0	63.952	3326500000	74	87540000	181170000	486530000	249660000	230490000	139440000	137570000	474420000	361150000	226850000	330980000	111920000	396370000	0.175797	1	0.239305	0.463478	0.418111	1
PfIT_010009100	conserved Plasmodium protein, unknown function	16.1891	22.3939	19.5756	15.6547	22.8209	20.3994	15.2204	22.2782	14.4985	19.6373	21.6339	20.0144							9	9	9	12.5	12.5	12.5	99.309	0	28.016	1171400000	27	25464000	3436800	253510000	35943000	2372900	1756100	37511000	340840000	233970000	149700000	63616000	0	48716000	0.0290316	1	0.238784	0.0863502	0.268312	1
PfIT_100012200	conserved Plasmodium protein, unknown function	21.2071	23.9877	23.6555	21.8714	23.8761	23.8099	21.5364	23.7926	23.2475	21.5311	23.1067	23.643							88	88	88	27.7	27.7	27.7	453.57	0	323.31	23067000000	385	118900000	469630000	3227200000	2563400000	744300000	590090000	587910000	2987000000	2819000000	1752300000	2853000000	1931900000	2541200000	0.0756147	1	0.23574	0.215109	0.0276035	1
PfIT_110047400	DnaJ protein, putative	22.5204	26.6889	22.7914	21.6875	26.6039	24.4106	22.9373	26.3808	20.671	24.904	25.8419	24.7251							10	10	10	24.3	24.3	24.3	39.363	0	45.478	7913200000	51	465480000	102280000	1839100000	123410000	57415000	136550000	533700000	1733800000	1485500000	1022400000	379120000	28381000	471450000	0.0406031	1	0.233753	0.119359	0.113832	1
PfIT_030013500	conserved Plasmodium protein, unknown function	16.2078	22.8276	21.8496	15.2918	23.3127	22.9749	19.8327	24.0993	18.8887	22.7561	23.6545	23.1206							6	6	6	15	15	15	57.958	0	12.744	2203200000	25	78685000	0	208430000	105810000	0	26145000	198340000	291730000	503230000	369710000	230830000	13590000	255360000	0.0231987	1	0.231464	0.0694235	0.0877358	1
PfIT_130076400	antigen 332, DBL-like protein	21.0068	23.4664	22.3838	19.9533	24.33	23.2633	19.845	24.0184	20.1118	20.8006	22.8651	22.4628							70	70	70	19.6	19.6	19.6	663.64	0	323.31	18245000000	265	85656000	448820000	2468700000	1165700000	216250000	200590000	389030000	4491900000	3619400000	1627300000	2144500000	241360000	1231300000	0.0528393	1	0.229856	0.153491	0.249517	1
PfIT_020018200	conserved protein, unknown function	20.7453	22.3162	21.0601	19.9292	22.7538	22.1077	15.873	22.2865	19.3943	21.7318	21.7558	21.7681							2	2	2	22.1	22.1	22.1	17.808	0	22.43	381570000	10	38157000	17577000	52221000	21863000	9983600	0	34828000	70727000	51157000	35411000	45193000	6890600	35716000	0.0803439	1	0.223061	0.227617	0.499178	1
PfIT_040009000	conserved Plasmodium protein, unknown function	16.0662	21.9408	18.8843	14.8458	20.8799	21.822	14.6396	22.1172	18.7238	21.7974	20.4623	22.4589							7	7	7	13.2	13.2	13.2	74.822	0	18.282	415740000	7	25984000	0	64411000	7742000	0	0	58317000	30874000	72791000	23115000	59320000	6926900	92244000	0.0265243	1	0.218823	0.0790986	0.0592649	1
PfIT_050033900	nucleolar preribosomal GTPase, putative	21.8737	23.8339	22.9885	21.7517	24.0003	23.5945	21.2445	23.8024	19.6067	21.7527	23.472	22.1877							12	12	12	27	27	27	63.933	0	44.541	3134500000	54	97954000	122970000	478490000	266300000	113000000	79502000	113070000	537000000	468150000	372320000	405300000	25548000	152870000	0.0859153	1	0.216785	0.242234	0.427664	1
PfIT_030028600	conserved Plasmodium protein, unknown function	20.0128	21.6629	21.9549	19.2884	21.9713	23.019	19.256	22.1964	21.9736	14.3849	21.5099	22.3388							13	13	13	17.5	17.5	17.5	115.76	0	69.088	1423300000	41	39536000	38083000	119530000	146340000	23051000	22539000	0	148020000	173020000	107500000	306000000	148250000	190960000	0.0591537	1	0.216038	0.170814	0.0202426	1
PfIT_010010100	ras-related protein Rab-5C	23.9279	25.6913	24.6191	23.4825	25.8961	25.4941	24.318	25.5013	24.19	24.5757	25.107	25.2536							10	10	10	52.8	52.8	52.8	24.3	0	45.722	5278300000	63	406030000	207470000	704330000	335000000	152360000	271880000	325050000	811790000	617450000	469800000	614370000	248810000	520030000	0.0825558	1	0.21146	0.233435	0.0392041	1
PfIT_140007700	Plasmodium exported protein, unknown function	15.9608	20.7694	21.2146	14.6282	21.8357	22.0976	15.155	21.9339	18.2589	18.2346	21.3894	21.3781							3	3	3	11.4	11.4	11.4	31.38	0	4.0916	293180000	5	22553000	0	23235000	31636000	0	0	4009600	48656000	52085000	35711000	58341000	4077800	35432000	0.0231289	1	0.205554	0.0692197	0.122463	1
PfIT_140030600	60S ribosomal protein L5, putative	27.0083	28.0673	28.0755	25.9841	28.971	28.8103	27.1182	28.6772	24.4262	27.1737	28.4062	27.5964							12	12	12	38.4	38.4	38.4	33.998	0	236.67	42978000000	54	3069900000	1889800000	3937600000	3960100000	929220000	2039500000	2119500000	7366500000	6009200000	4980300000	6590000000	315620000	2841100000	0.0693045	1	0.204749	0.198271	0.308409	1
PfIT_140064700	conserved Plasmodium protein, unknown function	18.1873	22.155	17.8413	16.7437	21.2697	20.7817	17.8789	21.4213	14.1168	19.9372	21.6237	20.8612							12	12	12	8	8	8	183.54	0	18.853	1583500000	40	18851000	25072000	392270000	19726000	9218000	20248000	84331000	212380000	235900000	271440000	151430000	1492300	160000000	0.034593	1	0.203901	0.102307	0.249518	1
PfIT_030009200	60S ribosomal protein L44	25.9797	27.6464	29.2677	25.7151	28.4412	29.3482	25.2175	29.0811	25.4615	25.1271	28.6888	28.1818							3	3	3	20.2	20.2	20.2	12.157	0	32.299	6905000000	22	3452500000	132340000	420180000	1292700000	110170000	78027000	73290000	728940000	1135800000	865380000	1366900000	92409000	608970000	0.0482318	1	0.203588	0.140728	0.266026	1
PfIT_050008800	actin-depolymerizing factor 1	15.6934	24.9599	22.061	16.7275	22.4501	24.1444	21.114	24.6877	22.0601	16.9549	24.2847	25.0026							2	2	2	23.8	23.8	23.8	13.741	0	76.778	1043000000	7	149000000	0	228440000	30627000	0	15887000	0	40109000	189170000	143060000	129800000	30609000	235310000	0.0190418	1	0.202561	0.0572363	0.228727	1
PfIT_130013100	conserved Plasmodium membrane protein, unknown function	16.5445	22.8909	16.2306	15.796	21.5672	18.9075	19.2928	20.7998	14.6479	20.865	19.7471	21.1555							5	5	5	6.7	6.7	6.7	100.23	0	6.5191	550130000	14	18970000	0	225550000	0	0	18626000	55386000	90112000	52936000	25519000	14261000	0	67737000	0.0246554	1	0.2016	0.0736695	0.0366494	1
[truncated: 929 more rows]
[truncated: 9 more columns]

## Sheet: Abbreviations
PHISTS						Candidates
P1	PfIT_080035300	PF3D7_0830600				1	PfIT_130058500	PF3D7_1353100	EMPIC1
P2	PfIT_120006500	PF3D7_1200900				2	PfIT_100006200	PF3D7_1002000	EMPIC2	HYP2
[truncated: 6 more rows]
